# Supplementary material for: A 4000-year long Late Holocene climate record from Hermes Cave (Peloponnese, Greece)
Source: Copernicus journal article supplement (doi:10.5194/cp-2020-47), 2020-05-07
Supplement: Supplementary file 1 [file cp-2020-47-supplement.zip]

Archive with 4 entries (4 files):
- GH1705-ClumpedIsotopeData.xlsx
- GH1705-IsotopeData.xls
- GH1705-ElementalData.xlsx
- Kluge-etal-CP-HermesCave-supplement.pdf
