# Supplementary material for: A 4000-year long Late Holocene climate record from Hermes Cave (Peloponnese, Greece)
Source: Copernicus journal article supplement (doi:10.5194/cp-2020-47), 2020-05-07
Supplement: Supplementary file 1 [file cp-2020-47-supplement.zip › GH1705-ElementalData.xlsx]

## Sheet: Tabelle1
final evaluated		Mg25	Mg26	Al27	P31	Ca43	Mn55	Fe56	Fe57	Sr86	Sr88	Ba135	Ba137	Ba138	Pb208		Depth from top
elemental ratios																	(mm)
		Mg/Ca	Mg/Ca	Al/Ca	P/Ca	Ca	Mn/Ca	Fe/Ca	Fe/Ca	Sr/Ca	Sr/Ca	Ba/Ca	Ba/Ca	Ba/Ca	Pb/Ca
procedure:
see Mischel et al., 2017a
		0.00143592	0.00136789	0.000148984	0.000222378	1	1.41142e-06	0.000117693	0.000756082	2.76095e-05	3.03152e-05	3.41789e-06	3.99414e-06	5.97552e-06	4.18668e-06		53.503
		0.00128349	0.00133945	0.000109828	0.000281316	1	2.67928e-07	0.0001144	0.000759337	2.57008e-05	3.20361e-05	6.40316e-06	6.50657e-06	6.13305e-06	2.73516e-06		53.5007
		0.00133079	0.00137557	8.72167e-05	0.000244366	1	1.23722e-06	9.50481e-05	0.000590866	2.40427e-05	3.13439e-05	5.01151e-06	4.86009e-06	5.81686e-06	2.86027e-06		53.4985
		0.00132024	0.00123251	8.92932e-05	0.000256265	1	1.09177e-06	7.47698e-05	0.000557384	2.29149e-05	2.75645e-05	6.64293e-06	6.75022e-06	4.7348e-06	2.83759e-06		53.4962
		0.00122871	0.00136504	7.46462e-05	0.000284022	1	2.31324e-06	0.000103286	0.000778391	2.57334e-05	4.35279e-05	4.97317e-06	7.71679e-06	6.80865e-06	5.25035e-06		53.494
		0.00142658	0.0013989	0.000139743	0.000295794	1	1.66772e-06	0.000213252	0.000696106	3.67709e-05	3.5553e-05	6.77863e-06	4.92004e-06	6.19065e-06	7.40677e-06		53.4917
		0.00144685	0.00143853	0.000204948	0.000245729	1	9.61316e-07	0.000206309	0.000878917	2.77499e-05	2.97576e-05	3.31863e-06	2.90854e-06	5.3556e-06	9.31853e-06		53.4894
		0.00132053	0.00125951	0.000108977	0.000270588	1	2.13398e-06	0.000135174	0.000668712	3.99175e-05	2.99573e-05	6.51188e-06	6.61705e-06	5.5118e-06	3.56947e-06		53.4872
		0.00151649	0.00142573	0.000116317	0.000277067	1	2.4227e-06	0.000112297	0.000675055	2.73125e-05	3.38423e-05	1.61275e-06	2.8627e-06	6.00344e-06	7.58054e-06		53.4849
		0.00131878	0.00139629	0.000105076	0.000263311	1	7.1712e-06	0.000133861	0.000885314	3.92543e-05	3.36392e-05	1.68757e-06	6.98973e-06	6.74174e-06	6.89172e-06		53.4827
		0.0013743	0.00138337	0.000188832	0.000275516	1	4.06979e-07	9.26119e-05	0.00155017	2.62374e-05	3.16517e-05	3.24803e-06	6.64241e-06	5.09605e-06	5.36278e-06		53.4804
		0.00124508	0.0012954	0.000292985	0.000293394	1	9.4205e-07	0.000108981	0.000965367	2.07308e-05	3.49609e-05	6.54507e-06	4.75051e-06	5.39409e-06	2.39985e-06		53.4781
		0.00140623	0.00140595	9.76419e-05	0.000262797	1	5.46364e-07	5.2665e-05	0.00086963	2.37278e-05	2.84852e-05	8.27066e-06	6.71508e-06	5.00457e-06	2.82281e-06		53.4759
		0.00129435	0.00128958	8.01435e-05	0.000217365	1	1.38937e-07	7.24666e-05	0.000684685	2.78586e-05	2.60733e-05	3.22223e-06	1.8827e-06	5.20002e-06	1.20096e-06		53.4736
		0.00143132	0.0013909	9.12286e-05	0.000299103	1	7.01881e-07	3.52059e-05	0.00063026	2.34844e-05	3.01135e-05	-4.22848e-08	3.95312e-06	7.73433e-06	2.90811e-06		53.4714
		0.00135596	0.00130655	8.38368e-05	0.000246388	1	6.49055e-09	4.33273e-05	0.000614471	3.85475e-05	2.60862e-05	1.57911e-06	5.60617e-06	4.87446e-06	2.74942e-06		53.4691
		0.0012876	0.00117921	6.72912e-05	0.000222039	1	6.53921e-07	2.85364e-05	0.000578028	2.8143e-05	2.94861e-05	7.93834e-06	2.76218e-06	4.66219e-06	1.55833e-06		53.4668
		0.00126097	0.00118615	0.000137538	0.000296395	1	7.90437e-07	3.48147e-05	0.000583197	3.38117e-05	2.85128e-05	3.17982e-06	9.2896e-07	6.55734e-06	1.76581e-06		53.4646
		0.00135098	0.00134726	6.53485e-05	0.000236194	1	1.55102e-07	5.5161e-05	0.000628354	2.80362e-05	2.87572e-05	1.27027e-05	5.25448e-06	4.99866e-06	2.21651e-06		53.4623
		0.00125454	0.00128698	6.46787e-05	0.000236998	1	1.54224e-07	2.38718e-05	0.000645597	3.9048e-05	3.06809e-05	1.44417e-05	3.13477e-06	6.57402e-06	8.9769e-07		53.4601
		0.00126498	0.00129501	5.48454e-05	0.000213652	1	5.9574e-07	3.43552e-05	0.000531715	3.70536e-05	2.53744e-05	9.01809e-06	5.22991e-06	4.17271e-06	2.4241e-06		53.4578
		0.00132502	0.00130255	6.38426e-05	0.000249321	1	1.79809e-06	8.08827e-05	0.000877267	3.13969e-05	2.609e-05	1.79304e-06	2.12182e-06	6.51176e-06	1.57454e-06		53.4555
		0.00137563	0.00123958	0.00012312	0.000262241	1	9.78435e-07	3.24113e-05	0.000737375	2.63261e-05	3.02875e-05	6.79786e-06	9.86778e-07	4.69377e-06	2.08132e-06		53.4533
		0.00126527	0.00123959	6.39247e-05	0.000206052	1	1.50731e-06	2.95194e-05	0.000608854	2.87014e-05	2.7938e-05	3.31971e-06	1.93966e-06	4.46431e-06	1.64143e-06		53.451
		0.00135108	0.0012756	5.67364e-05	0.000275273	1	7.03117e-07	3.38007e-05	0.00075949	3.5071e-05	2.92878e-05	8.53556e-06	2.96998e-06	5.31681e-06	2.29439e-06		53.4487
		0.00143121	0.00133927	5.38319e-05	0.000238942	1	1.27199e-06	5.43074e-05	0.000627363	2.95739e-05	2.87873e-05	5.15233e-06	6.99538e-06	5.06012e-06	2.10775e-06		53.4465
		0.00131091	0.00129827	5.91815e-05	0.00026438	1	1.27613e-06	2.30896e-05	0.000699264	1.89532e-05	4.14562e-05	8.64391e-06	4.01035e-06	3.69188e-06	2.53241e-06		53.4442
		0.00135112	0.00128048	5.96776e-05	0.000242292	1	1.45734e-06	1.97364e-05	0.000678046	2.95098e-05	3.09584e-05	7.10249e-06	5.1551e-06	6.16994e-06	1.31533e-06		53.442
		0.00117185	0.00126728	5.4975e-05	0.000211824	1	9.60764e-07	0.00042647	0.000675826	3.15007e-05	2.71604e-05	-4.14591e-08	8.721e-06	5.64994e-06	1.84184e-06		53.4397
		0.00124804	0.00136197	5.60652e-05	0.000263365	1	2.792e-07	3.48643e-05	0.000656286	3.80783e-05	2.98367e-05	1.63701e-06	2.90577e-06	5.0532e-06	2.24479e-06		53.4374
		0.00126711	0.00120822	5.42169e-05	0.000217962	1	3.97793e-07	2.51383e-05	0.000637657	2.38425e-05	2.94963e-05	4.78192e-06	3.70997e-06	5.83507e-06	1.56974e-06		53.4352
		0.0012251	0.00127363	0.000163857	0.000203954	1	8.9976e-07	1.92187e-05	0.000741322	2.15638e-05	3.19811e-05	4.67861e-06	3.62982e-06	4.03785e-06	7.79572e-07		53.4329
		0.00133025	0.00125402	4.96019e-05	0.000152496	1	6.47076e-07	2.45256e-05	0.000680815	3.31612e-05	3.20088e-05	6.27643e-06	3.64445e-06	5.73201e-06	2.68103e-06		53.4307
		0.0013526	0.00139427	5.473e-05	0.000194181	1	3.84578e-07	2.91191e-05	0.000553993	2.56647e-05	3.07057e-05	-3.83657e-08	3.58673e-06	4.67793e-06	1.89124e-06		53.4284
		0.00128722	0.00119445	4.84564e-05	0.000190283	1	8.96689e-07	2.26692e-05	0.000621751	2.14902e-05	3.41811e-05	3.09553e-06	3.61743e-06	4.44041e-06	1.71901e-06		53.4261
		0.00129662	0.0012258	0.00013082	0.000186648	1	3.91913e-07	1.76613e-05	0.00075559	3.8587e-05	3.10885e-05	4.71123e-06	5.48274e-06	5.88906e-06	1.35615e-06		53.4239
		0.00136689	0.00129262	4.21408e-05	0.000189386	1	2.01236e-06	1.70639e-05	0.000603978	2.63801e-05	2.72608e-05	1.38646e-05	7.13139e-06	5.33446e-06	2.62307e-06		53.4216
		0.0012905	0.00118207	0.000238791	0.000204789	1	3.87262e-07	1.16029e-05	0.000602799	3.81291e-05	3.08198e-05	3.09067e-06	6.3206e-06	5.95776e-06	2.65699e-06		53.4194
		0.00120493	0.00128446	0.000147706	0.000182744	1	1.12746e-06	1.2202e-05	0.000794172	2.44919e-05	3.53477e-05	3.03195e-06	7.97221e-06	5.84456e-06	1.49915e-06		53.4171
		0.00130087	0.00124236	4.18298e-05	0.000176041	1	7.48335e-07	1.61847e-05	0.000700974	3.28655e-05	3.16794e-05	6.05868e-06	3.51801e-06	4.04842e-06	9.38802e-07		53.4148
		0.00127943	0.00129442	5.69952e-05	0.000135876	1	8.80372e-07	4.19961e-05	0.000654633	2.36876e-05	2.95181e-05	6.11655e-06	9.76721e-06	5.44972e-06	2.98276e-06		53.4126
		0.00134596	0.00124729	3.84162e-05	0.000162196	1	8.46811e-07	2.26734e-05	0.000612672	3.02545e-05	3.41763e-05	1.03233e-05	5.12436e-06	5.24197e-06	1.62339e-06		53.4103
		0.00133872	0.00133981	3.78812e-05	0.000169211	1	2.54083e-07	2.27485e-05	0.000597245	3.29392e-05	2.80328e-05	4.54467e-06	4.40736e-06	5.81613e-06	1.12455e-06		53.4081
		0.00133428	0.00139679	4.53786e-05	0.000176935	1	1.0548e-06	2.12836e-05	0.000538508	3.30036e-05	3.49026e-05	3.18897e-06	9.31681e-06	5.5753e-06	1.18857e-06		53.4058
		0.00130524	0.00128669	0.000121991	0.000183351	1	8.99048e-07	2.96137e-05	0.0012735	4.44587e-05	3.34657e-05	4.67491e-06	8.1608e-06	6.53949e-06	1.34569e-06		53.4035
		0.00131689	0.00138015	3.84741e-05	0.000155014	1	1.4394e-06	2.8704e-05	0.000830369	2.74083e-05	3.49021e-05	3.17014e-06	8.33557e-06	5.54238e-06	3.6902e-06		53.4013
		0.00132144	0.00126164	4.44959e-05	0.000171197	1	2.59195e-05	0.000137557	0.00054853	3.23007e-05	3.29709e-05	7.08394e-06	4.10822e-06	5.04308e-06	4.12987e-06		53.399
		0.0012969	0.00124337	3.3729e-05	0.000152813	1	1.07037e-06	2.48168e-05	0.000586521	2.48864e-05	3.15039e-05	7.25024e-06	2.52275e-06	4.90334e-06	1.24804e-06		53.3968
		0.00122421	0.001318	3.58895e-05	0.000143907	1	1.05061e-06	2.10272e-05	0.000582551	3.55779e-05	3.19826e-05	1.5683e-06	6.49571e-06	5.98039e-06	2.73059e-06		53.3945
		0.00133621	0.00129948	5.1513e-05	0.000132694	1	2.929e-06	5.79745e-05	0.000684042	2.67347e-05	3.54486e-05	6.22328e-06	8.13071e-06	4.71295e-06	1.15251e-06		53.3922
		0.00136956	0.00129341	6.74895e-05	0.000156776	1	8.45894e-07	0.000208513	0.000612009	3.60257e-05	3.4613e-05	4.39851e-06	2.55932e-06	6.67663e-06	2.86594e-06		53.39
		0.00133953	0.00128336	4.91871e-05	0.000158164	1	1.24431e-06	2.76092e-05	0.000596456	3.6318e-05	2.75074e-05	3.01322e-06	8.80334e-06	3.91707e-06	2.5904e-06		53.3877
		0.00137548	0.00131703	5.27843e-05	0.000133288	1	5.16829e-07	5.62138e-05	0.000687104	3.56733e-05	4.03441e-05	4.67852e-06	6.35209e-06	5.56963e-06	2.67022e-06		53.3855
		0.00133585	0.00120617	6.79111e-05	0.00017346	1	6.03118e-07	2.6634e-05	0.000448593	4.24638e-05	3.42657e-05	2.90679e-06	3.39687e-06	4.95162e-06	2.8528e-06		53.3832
		0.00137004	0.00145216	0.000327192	0.000177171	1	1.79997e-06	3.5333e-05	0.00065232	3.59071e-05	3.06282e-05	7.33113e-06	6.80264e-06	6.78518e-06	1.79345e-06		53.3809
		0.00133418	0.00125614	6.37112e-05	0.000153569	1	5.93503e-07	3.33309e-05	0.000624449	4.01622e-05	3.26987e-05	4.30854e-06	3.34271e-06	5.64222e-06	3.3297e-06		53.3787
		0.001273	0.00125528	6.18577e-05	0.000151477	1	1.07312e-06	4.28465e-05	0.00062999	2.65888e-05	3.11167e-05	2.88583e-06	5.90168e-06	5.95108e-06	3.00789e-06		53.3764
		0.00144644	0.00138617	0.000101001	0.000132805	1	4.23198e-07	3.56991e-05	0.000619448	4.26264e-05	3.30226e-05	1.53471e-05	3.94691e-06	4.99627e-06	5.78212e-06		53.3742
		0.00141765	0.00137311	7.05218e-05	0.000143995	1	1.07978e-06	3.80391e-05	0.001178	2.63704e-05	3.74235e-05	4.91715e-06	6.67608e-06	6.29283e-06	3.80004e-06		53.3719
		0.0013401	0.00131069	6.02301e-05	0.000169249	1	1.32774e-06	3.61322e-05	0.000510809	3.19242e-05	3.09617e-05	5.88516e-06	5.98021e-06	5.89915e-06	2.15789e-06		53.3696
		0.00132739	0.00125359	5.3471e-05	0.000168592	1	1.26912e-07	2.69689e-05	0.000556943	2.62829e-05	3.56515e-05	4.43339e-06	6.87923e-06	5.40979e-06	2.70949e-06		53.3674
		0.00125241	0.00133727	7.87184e-05	0.000128352	1	1.08205e-06	3.48518e-05	0.000499836	2.92887e-05	3.29803e-05	1.43674e-06	4.25054e-06	4.43498e-06	1.6159e-06		53.3651
		0.00127683	0.00137631	5.47844e-05	0.000147001	1	2.47112e-07	3.97538e-05	0.000725948	3.20355e-05	2.93568e-05	2.93443e-06	2.57181e-06	4.34087e-06	2.16541e-06		53.3629
		0.00138238	0.00129122	0.000109501	0.00016147	1	6.03837e-07	3.32811e-05	0.000686108	3.42506e-05	3.1852e-05	5.85703e-06	5.95163e-06	4.56608e-06	1.61612e-06		53.3606
		0.00130577	0.0013055	5.4421e-05	0.000145808	1	8.33166e-07	0.000262749	0.000594435	3.14003e-05	3.50254e-05	4.33233e-06	3.36117e-06	5.5444e-06	1.24708e-06		53.3583
		0.00133875	0.00120841	5.33554e-05	0.000130512	1	9.16495e-07	2.67378e-05	0.000685477	3.65436e-05	3.40116e-05	4.17357e-06	3.23799e-06	5.5897e-06	1.37004e-06		53.3561
		0.00139074	0.00124133	6.8582e-05	0.000131581	1	1.25226e-07	3.24263e-05	0.000684691	3.25306e-05	3.24456e-05	4.37451e-06	5.09088e-06	4.81707e-06	2.49671e-06		53.3538
		0.00131092	0.0013092	5.10086e-05	0.000203245	1	1.06372e-06	2.15675e-05	0.000582876	2.79803e-05	3.4092e-05	5.75702e-06	7.52155e-06	3.59037e-06	1.93678e-06		53.3516
		0.00143333	0.00124182	4.6964e-05	0.000150244	1	8.29142e-07	1.63172e-05	0.000608214	2.55598e-05	3.28133e-05	5.76062e-06	6.68995e-06	3.97758e-06	2.98342e-06		53.3493
		0.00137847	0.00145398	4.59659e-05	0.000148568	1	1.22043e-07	2.56279e-05	0.000634357	3.09e-05	2.99684e-05	4.26331e-06	9.09622e-06	5.20225e-06	7.08589e-06		53.347
		0.00123925	0.0012849	4.67128e-05	0.000138929	1	2.85229e-05	1.59307e-05	0.000694862	3.4669e-05	3.31611e-05	2.87641e-06	5.88241e-06	1.67703e-05	8.07678e-06		53.3448
		0.00128877	0.00127261	3.93622e-05	0.000141899	1	1.1559e-06	2.08014e-05	0.000586639	3.61219e-05	3.58122e-05	1.38207e-06	4.90662e-06	5.39575e-06	4.792e-06		53.3425
		0.00148426	0.00143101	4.45649e-05	0.000159679	1	4.94895e-07	2.09766e-05	0.000588742	4.17601e-05	3.26489e-05	5.98583e-06	6.95149e-06	6.26679e-06	2.5569e-06		53.3402
		0.00134263	0.00139954	4.89946e-05	0.000134473	1	8.26991e-07	2.19882e-05	0.000664759	3.35994e-05	3.51364e-05	8.63642e-06	8.34084e-06	5.37529e-06	4.5399e-06		53.338
		0.00138157	0.00132071	2.88123e-05	0.00018129	1	3.62477e-07	1.77428e-05	0.000572633	3.40461e-05	3.53219e-05	1.46097e-05	9.29694e-06	6.6142e-06	2.66304e-06		53.3357
		0.0014454	0.00134786	7.96357e-05	0.000162834	1	8.68888e-07	2.37513e-05	0.00063737	4.3819e-05	3.38997e-05	9.07396e-06	7.88703e-06	6.58912e-06	2.39605e-06		53.3335
		0.0016822	0.00129572	4.27843e-05	0.00017651	1	1.53979e-06	3.81233e-05	0.000752133	3.29787e-05	3.36629e-05	5.77895e-06	5.87229e-06	6.56524e-06	3.34252e-06		53.3312
		0.00131637	0.00132486	0.000108629	0.000154016	1	1.1221e-06	2.73973e-05	0.000759171	3.66088e-05	3.27369e-05	5.46864e-06	8.7326e-06	6.57826e-06	1.01276e-06		53.3289
		0.00132019	0.00130358	3.43515e-05	0.000147546	1	1.45747e-06	3.38776e-05	0.000545912	3.04439e-05	3.25687e-05	2.71795e-06	3.97022e-06	5.60487e-06	1.17845e-06		53.3267
		0.00140825	0.0014058	3.07043e-05	0.000185293	1	8.17436e-07	0.000213853	0.000558592	2.43978e-05	3.116e-05	7.10789e-06	2.47322e-06	4.80707e-06	1.91063e-06		53.3244
		0.00142448	0.00133793	3.47323e-05	0.000146791	1	5.9379e-07	2.12674e-05	0.000608104	3.44933e-05	3.46643e-05	7.20837e-06	7.52489e-06	5.25998e-06	1.41503e-06		53.3222
		0.00139757	0.0012908	4.21188e-05	0.000174681	1	1.13403e-06	1.49112e-05	0.000692357	3.41591e-05	3.13994e-05	6.13753e-06	6.23666e-06	7.38287e-06	2.06479e-06		53.3199
		0.00136276	0.00151728	7.27866e-05	0.000159378	1	6.37271e-07	1.80072e-05	0.000750898	4.13797e-05	4.74721e-05	1.70663e-05	8.0759e-06	6.33373e-06	2.6404e-06		53.3177
		0.00136332	0.00141977	3.80967e-05	0.000208223	1	8.56134e-07	1.97256e-05	0.0010149	4.23366e-05	3.34021e-05	2.95553e-06	6.90774e-06	5.69724e-06	2.90064e-06		53.3154
		0.00141307	0.0014391	2.91952e-05	0.000183487	1	7.34842e-07	1.39747e-05	0.000817318	3.4791e-05	3.45601e-05	8.94271e-06	3.45458e-06	6.36125e-06	1.82156e-06		53.3131
		0.00141636	0.00147755	5.35163e-05	0.000165002	1	2.58814e-07	2.38371e-05	0.000608366	3.44252e-05	3.67282e-05	9.29731e-06	4.48943e-06	8.68085e-06	2.08088e-06		53.3109
		0.00144458	0.00153639	4.81034e-05	0.000184939	1	5.00608e-07	0.000303104	0.00069179	3.96793e-05	3.43921e-05	4.53168e-06	5.27379e-06	6.06933e-06	1.67073e-06		53.3086
		0.00132303	0.00136118	3.45992e-05	0.000157091	1	9.36505e-07	2.0275e-05	0.000626327	3.41257e-05	3.34681e-05	2.83133e-06	6.61746e-06	5.58479e-06	1.91699e-06		53.3064
		0.00140371	0.0013843	3.34731e-05	0.000209594	1	2.4229e-07	2.72967e-05	0.000703414	2.81427e-05	3.27031e-05	2.87717e-06	4.20279e-06	4.64316e-06	2.47344e-06		53.3041
		0.00132345	0.00134905	0.000280913	0.000134202	1	4.86444e-07	2.39396e-05	0.000663714	2.69356e-05	2.99107e-05	-3.65433e-08	5.12458e-06	6.68415e-06	3.40306e-06		53.3018
		0.00147007	0.00142271	4.52679e-05	0.000154963	1	6.2685e-07	2.29418e-05	0.000606815	2.78357e-05	3.60061e-05	7.60971e-06	6.17845e-06	6.0947e-06	1.30992e-06		53.2996
		0.00131063	0.00148937	3.778e-05	0.000169952	1	-1.25054e-07	3.5223e-05	0.000847839	2.31332e-05	3.79451e-05	3.20129e-06	2.8057e-06	6.88872e-06	2.5572e-06		53.2973
		0.00135446	0.00129427	4.00104e-05	0.00019138	1	8.44291e-07	1.96103e-05	0.000585419	2.85093e-05	3.43583e-05	2.91464e-06	5.9606e-06	5.09568e-06	5.541e-07		53.295
		0.001462	0.00146461	4.07049e-05	0.000188009	1	1.26302e-06	1.71047e-05	0.000614319	3.59956e-05	3.60544e-05	1.38978e-05	7.14846e-06	4.52445e-06	2.81553e-06		53.2928
		0.00145177	0.00133673	0.000488939	0.000179773	1	1.16709e-06	3.77606e-05	0.000539117	3.24815e-05	3.30272e-05	4.72742e-06	6.41847e-06	7.31663e-06	6.32847e-06		53.2905
		0.00128858	0.00145222	4.83598e-05	0.000170544	1	8.71584e-07	3.35944e-05	0.000674351	4.22461e-05	3.57619e-05	7.57872e-06	4.39517e-06	5.39532e-06	1.67088e-06		53.2883
		0.00138709	0.00134185	3.22515e-05	0.00021546	1	1.3886e-06	3.94441e-05	0.000632053	3.25191e-05	3.84328e-05	4.6065e-06	7.14784e-06	5.89526e-06	1.13985e-06		53.286
		0.00133847	0.00141578	8.81943e-05	0.000183418	1	1.13161e-06	3.513e-05	0.000876768	3.32222e-05	3.42933e-05	1.99907e-05	8.00158e-06	5.04743e-06	2.6161e-06		53.2837
		0.00143518	0.00143695	4.29585e-05	0.000142458	1	6.11974e-07	2.38334e-05	0.000695354	3.88996e-05	3.21856e-05	8.92245e-06	3.44675e-06	5.68556e-06	1.27883e-06		53.2815
		0.00125441	0.00140935	4.79848e-05	0.000178525	1	7.82943e-07	0.000374561	0.000742553	2.45486e-05	3.11017e-05	6.33888e-06	7.3615e-06	5.22416e-06	2.13253e-06		53.2792
		0.00124619	0.00127963	4.43597e-05	0.00018367	1	7.88842e-07	2.08364e-05	0.0007943	3.37434e-05	3.46292e-05	-3.96675e-08	5.5627e-06	4.83667e-06	2.34176e-06		53.277
		0.00138067	0.00145159	4.79633e-05	0.000216146	1	6.5322e-07	2.74837e-05	0.00068728	4.50973e-05	3.22107e-05	3.14826e-06	4.59879e-06	7.19811e-06	2.51484e-06		53.2747
		0.00137007	0.00130171	5.94865e-05	0.000180604	1	1.44852e-06	3.23535e-05	0.000849	3.63931e-05	3.56122e-05	5.43643e-06	8.68116e-06	4.72263e-06	1.33564e-06		53.2724
		0.00144427	0.0014339	5.35761e-05	0.000186952	1	2.91505e-06	3.52681e-05	0.000570694	3.59133e-05	3.28949e-05	5.48026e-06	7.15997e-06	4.27236e-06	3.00399e-06		53.2702
		0.00135596	0.00149919	6.1606e-05	0.000178438	1	3.67304e-07	3.36815e-05	0.000622886	4.53206e-05	3.63629e-05	1.33201e-05	1.71277e-06	6.30794e-06	1.98474e-06		53.2679
		0.0013422	0.00138128	5.15777e-05	0.000140285	1	8.1119e-07	5.18954e-05	0.000611334	3.29574e-05	3.20119e-05	2.80037e-06	6.5451e-06	4.8959e-06	1.38464e-06		53.2657
		0.00135872	0.00143561	5.57496e-05	0.000143165	1	1.06272e-06	3.20632e-05	0.000673757	3.3634e-05	3.10932e-05	1.1539e-05	5.84448e-06	7.17494e-06	2.10891e-06		53.2634
		0.00149738	0.00128494	6.95603e-05	0.000169494	1	1.14837e-06	2.61239e-05	0.000692129	3.37141e-05	3.51017e-05	1.55961e-05	3.60885e-06	5.53756e-06	1.33898e-06		53.2611
		0.00134441	0.0013508	6.01106e-05	0.000232002	1	2.56082e-06	0.000182361	0.000759877	#VALUE!	3.40176e-05	1.53463e-06	6.35627e-06	6.96696e-06	1.726e-06		53.2589
		0.00139244	0.0012918	5.4643e-05	0.000164226	1	1.0232e-06	0.000136306	0.000666316	3.72849e-05	3.33553e-05	4.6595e-06	7.23007e-06	8.04384e-06	1.34126e-06		53.2566
		0.00130732	0.00131952	8.80101e-05	0.000174645	1	1.08829e-06	3.0617e-05	0.000630387	3.02886e-05	3.45947e-05	5.89001e-06	9.40545e-06	5.90401e-06	2.69413e-06		53.2544
		0.00138613	0.00127342	4.70927e-05	0.000166098	1	8.3999e-07	2.73545e-05	0.000489676	9.17831e-05	3.03269e-05	2.8998e-06	6.77748e-06	5.19975e-06	1.25729e-06		53.2521
		0.00145494	0.00139497	6.53107e-05	0.000138638	1	1.21545e-06	1.63014e-05	0.000770959	2.87899e-05	3.4792e-05	8.90388e-06	6.87923e-06	5.80571e-06	1.99282e-06		53.2498
		0.00123013	0.00126835	5.14929e-05	0.000151368	1	7.42238e-07	2.96212e-05	0.000912407	2.92065e-05	3.63611e-05	1.20561e-05	4.36166e-06	6.29138e-06	2.02166e-06		53.2476
		0.00129156	0.00132932	4.94776e-05	0.000177223	1	1.07209e-06	1.9086e-05	0.000612617	3.72051e-05	3.79154e-05	1.01811e-05	6.73838e-06	7.3675e-06	1.77651e-06		53.2453
		0.00139072	0.00149983	5.08591e-05	0.000129957	1	4.83672e-07	2.88364e-05	0.000651478	3.1734e-05	3.28514e-05	1.43523e-06	7.64315e-06	4.30001e-06	9.0648e-07		53.2431
		0.00138356	0.00142161	5.00113e-05	0.000196203	1	2.3446e-06	3.20427e-05	0.000588945	3.45094e-05	4.03399e-05	9.56245e-06	1.10823e-05	5.38472e-06	7.93352e-07		53.2408
		0.0014358	0.00139961	5.87853e-05	0.000163081	1	5.16967e-07	3.95668e-05	0.000732468	3.83293e-05	3.43066e-05	6.25279e-06	2.72297e-06	5.4318e-06	9.68879e-07		53.2385
		0.00145431	0.00126283	4.51639e-05	0.000170744	1	7.40989e-07	0.000247128	0.000486035	3.42357e-05	3.24318e-05	-3.72612e-08	6.0961e-06	3.87505e-06	9.29586e-07		53.2363
		0.0013212	0.00141512	0.000265069	0.000158754	1	6.27537e-07	3.75346e-05	0.00060748	3.81713e-05	3.02577e-05	4.55562e-06	5.30165e-06	5.69454e-06	3.52064e-06		53.234
		0.00128857	0.00139508	4.64483e-05	0.000166409	1	1.34728e-06	2.99178e-05	0.000492438	2.48117e-05	3.26684e-05	5.97175e-06	1.73372e-06	6.25205e-06	1.64777e-06		53.2317
		0.00140498	0.00144799	6.61059e-05	0.00020826	1	4.65942e-06	2.45617e-05	0.000757035	3.08008e-05	3.55765e-05	3.06009e-06	1.07284e-05	5.89879e-06	1.14053e-06		53.2295
		0.00132059	0.001309	4.65158e-05	0.000138352	1	1.06504e-05	5.90523e-05	0.000698672	3.02128e-05	3.40719e-05	2.69731e-06	5.51616e-06	6.04613e-06	8.41151e-07		53.2272
		0.00141154	0.001439	4.77945e-05	0.000171219	1	1.77656e-05	5.43406e-05	0.000714639	2.38967e-05	3.30493e-05	2.95827e-06	3.45703e-06	5.17196e-06	1.46272e-06		53.225
		0.00153947	0.00131169	4.9173e-05	0.000139306	1	1.79267e-05	0.000207551	0.00065271	3.80655e-05	3.2927e-05	3.15821e-06	3.69068e-06	3.53919e-06	7.92642e-07		53.2227
		0.00125681	0.00131368	7.75511e-05	0.000134077	1	1.7168e-05	5.84857e-05	0.000939513	4.11551e-05	4.14027e-05	6.56272e-06	3.81068e-06	4.67763e-06	2.20784e-06		53.2204
		0.00140512	0.00129578	0.00016629	0.000130471	1	1.25554e-05	4.17724e-05	0.00114855	3.01603e-05	3.21474e-05	4.64442e-06	2.7024e-06	5.66729e-06	2.65076e-06		53.2182
		0.00133758	0.00124267	0.00074802	0.000175985	1	9.94659e-06	0.000126414	0.00144183	3.97321e-05	3.38078e-05	1.04143e-05	5.16951e-06	5.55261e-06	1.09916e-06		53.2159
		0.00142735	0.00136545	0.000829529	0.000200201	1	7.65073e-06	0.000109631	0.000665608	3.41518e-05	3.27771e-05	7.67978e-06	9.79864e-06	4.92044e-06	2.80675e-06		53.2137
		0.00142886	0.00147256	0.000181874	0.000160855	1	4.498e-06	0.00042515	0.000973981	3.43733e-05	3.41648e-05	5.14386e-06	4.98845e-06	5.20491e-06	1.68855e-06		53.2114
		0.00138307	0.00129063	6.77409e-05	0.000124487	1	3.33178e-06	4.36627e-05	0.000588885	2.72322e-05	3.12124e-05	5.07785e-06	4.92443e-06	4.38241e-06	2.07729e-06		53.2092
		0.00131762	0.00131612	5.78451e-05	0.000153695	1	3.115e-06	0.000182197	0.000770478	4.04589e-05	3.27204e-05	5.17814e-06	5.02169e-06	5.08546e-06	2.58285e-08		53.2069
		0.00152487	0.00140523	0.000177921	0.000174459	1	1.11204e-06	6.10281e-05	0.000479743	3.5749e-05	3.41797e-05	6.76623e-06	3.92885e-06	5.12414e-06	2.2763e-06		53.2046
		0.00133709	0.00152499	0.000100114	0.000159964	1	1.86861e-06	0.000137235	0.000639107	3.80425e-05	3.54265e-05	3.48466e-06	6.10831e-06	4.37369e-06	1.51088e-06		53.2024
		0.00157766	0.00157454	0.000100671	0.000183236	1	3.0453e-06	9.69854e-05	0.000905816	3.14246e-05	4.20724e-05	5.85958e-06	4.54606e-06	5.5803e-06	1.9235e-06		53.2001
		0.00143949	0.00143543	0.000116755	0.000193838	1	1.78771e-06	0.000277368	0.000735686	2.19904e-05	3.34281e-05	1.09221e-05	4.21923e-06	8.41689e-06	3.10387e-06		53.1979
		0.00150469	0.00132262	0.000128484	0.000133119	1	1.98474e-06	0.00011651	0.00110049	2.67942e-05	3.71798e-05	1.214e-05	7.03047e-06	6.62688e-06	3.16467e-06		53.1956
		0.0014427	0.0013196	0.0001067	0.000196454	1	1.78325e-06	0.000198744	0.000783999	4.57472e-05	3.40238e-05	3.32547e-06	6.80077e-06	5.06844e-06	6.90789e-06		53.1933
		0.00141343	0.00135157	8.47156e-05	0.00018694	1	3.92621e-06	0.000452452	0.0010507	3.1382e-05	3.39647e-05	1.68174e-06	4.97536e-06	5.95482e-06	3.55012e-06		53.1911
		0.00130781	0.00134812	0.00023733	0.000162886	1	4.60497e-06	0.000339142	0.00110132	2.19119e-05	4.07149e-05	1.62485e-06	2.01914e-05	4.86811e-06	3.43003e-06		53.1888
		0.00155995	0.00135447	0.000144326	0.000208126	1	5.28914e-06	0.000238301	0.000865674	4.52998e-05	3.29253e-05	7.38991e-06	7.50926e-06	5.59646e-06	4.05076e-06		53.1865
		0.00134911	0.00139733	0.000118453	0.00016821	1	1.96201e-06	0.00018771	0.000820964	2.45577e-05	4.02816e-05	-4.24801e-08	5.95712e-06	5.02724e-06	1.14051e-05		53.1843
		0.00175822	0.00129616	9.65227e-05	0.000142292	1	2.56687e-06	9.51059e-05	0.00104742	2.20604e-05	3.51829e-05	6.96484e-06	4.04417e-06	5.74004e-06	5.29252e-06		53.182
		0.00138189	0.00136526	0.000157928	0.000164273	1	3.12049e-06	0.000159996	0.00101225	2.78189e-05	3.42296e-05	5.18726e-06	4.02445e-06	4.16804e-06	3.58949e-06		53.1798
		0.00149651	0.00139801	0.000258368	0.000142073	1	1.87463e-06	0.00011042	0.000859548	2.73589e-05	3.28444e-05	5.70275e-06	5.53045e-06	4.58224e-06	5.09861e-06		53.1775
		0.00147043	0.00146195	0.000158234	0.00014167	1	2.60354e-06	0.000164953	0.00126525	3.2128e-05	3.57305e-05	3.71604e-06	3.25684e-06	3.16479e-06	2.06359e-06		53.1752
		0.00132979	0.0013644	0.000139319	0.00021061	1	9.43588e-07	0.000119366	0.00108262	2.74302e-05	3.73601e-05	1.14831e-05	2.2179e-06	5.61529e-06	3.95649e-06		53.173
		0.00151828	0.00158083	0.000157806	0.000199245	1	1.72351e-06	7.17838e-05	0.000839696	4.46734e-05	3.41599e-05	5.71753e-06	2.21787e-06	5.6152e-06	1.41476e-06		53.1707
		0.00124608	0.00139724	0.000107812	0.000166106	1	2.24272e-06	5.68916e-05	0.000670872	4.67624e-05	3.56576e-05	6.44225e-06	7.48155e-06	4.87879e-06	2.557e-06		53.1685
		0.00140583	0.00141978	0.000303673	0.000163293	1	2.47694e-06	8.18059e-05	0.000738732	4.02501e-05	3.54665e-05	6.72083e-06	6.82938e-06	4.79032e-06	2.87086e-06		53.1662
		0.00139323	0.0013779	7.01515e-05	0.000142047	1	1.59179e-06	5.0342e-05	0.0006022	3.62822e-05	2.99584e-05	1.73098e-06	4.09684e-06	4.24302e-06	3.01384e-06		53.1639
		0.00143534	0.00142315	0.000114885	0.000178519	1	2.00935e-06	0.000142748	0.000618085	3.20671e-05	3.63991e-05	3.48041e-06	4.0672e-06	4.83646e-06	1.72089e-06		53.1617
		0.00141294	0.00127064	6.70497e-05	0.000187567	1	1.63852e-06	4.87737e-05	0.00113635	3.04895e-05	3.24623e-05	4.98447e-06	1.54693e-05	3.41168e-06	1.4348e-06		53.1594
		0.00138924	0.00148454	0.000255816	0.000192544	1	9.55429e-07	2.91868e-05	0.000883782	2.34099e-05	3.47137e-05	1.89776e-06	5.61444e-06	4.82415e-06	2.83629e-06		53.1572
		0.00149331	0.00136565	6.50399e-05	0.000181018	1	1.19521e-06	5.20843e-05	0.000736293	3.22671e-05	3.05274e-05	9.10163e-06	5.27836e-06	5.5074e-06	1.56673e-06		53.1549
		0.0013847	0.00138581	8.8078e-05	0.000197144	1	4.45219e-07	0.000128727	0.000558687	3.8791e-05	3.03638e-05	7.15104e-06	1.03805e-06	5.25625e-06	3.48723e-06		53.1526
		0.00130552	0.00145464	7.48995e-05	0.000181548	1	1.08882e-06	4.54267e-05	0.000962689	3.4632e-05	3.58978e-05	5.66169e-06	4.39252e-06	4.04371e-06	4.1466e-06		53.1504
		0.00147443	0.00142214	0.000200627	0.000211903	1	1.86673e-06	0.000149789	0.000608094	3.5039e-05	3.39234e-05	7.006e-06	5.08506e-06	4.36929e-06	3.84032e-06		53.1481
		0.00139064	0.00150465	6.4321e-05	0.000213985	1	2.81333e-06	4.3855e-05	0.000785145	3.24301e-05	3.40498e-05	5.14322e-06	6.98302e-06	6.12284e-06	2.31189e-06		53.1459
		0.00130811	0.00136491	7.18523e-05	0.000212156	1	1.4538e-06	3.85225e-05	0.000708292	4.49558e-05	3.14093e-05	4.82279e-06	3.74168e-06	4.01873e-06	1.58316e-06		53.1436
		0.00146759	0.00147893	6.44289e-05	0.000198694	1	1.73857e-06	4.0472e-05	0.000902718	2.87566e-05	3.1728e-05	7.70614e-06	8.94934e-06	5.14925e-06	1.89327e-06		53.1413
		0.0013985	0.00132992	0.000162671	0.000227148	1	2.2193e-06	3.68015e-05	0.000638702	3.46068e-05	3.7513e-05	4.13865e-06	6.0455e-06	5.56561e-06	4.31371e-06		53.1391
		0.00144325	0.00135027	4.88777e-05	0.000209479	1	4.39958e-06	5.87349e-05	0.000777704	2.97475e-05	3.66984e-05	1.8845e-06	4.4602e-06	4.79046e-06	1.65485e-06		53.1368
		0.00127875	0.00142637	4.88464e-05	0.000177084	1	1.9702e-06	2.86835e-05	0.000645737	4.50076e-05	3.27021e-05	1.68497e-06	9.97012e-06	5.66024e-06	1.89508e-06		53.1346
		0.00141471	0.00140382	4.03454e-05	0.000247575	1	1.66904e-06	2.81502e-05	0.000510407	3.39287e-05	3.09906e-05	5.07733e-06	4.92392e-06	5.74212e-06	1.05119e-06		53.1323
		0.00137886	0.001398	4.44053e-05	0.000229292	1	6.08808e-07	2.85759e-05	0.000724256	3.57887e-05	3.13851e-05	9.21592e-06	1.06891e-06	3.11608e-06	1.58641e-06		53.13
		0.00143212	0.00129489	4.38189e-05	0.000206126	1	5.71552e-06	2.51176e-05	0.000642823	3.58467e-05	2.95102e-05	3.5614e-06	1.04043e-06	3.03308e-06	1.76093e-06		53.1278
		0.00133589	0.00136623	4.3807e-05	0.000213061	1	2.91883e-07	2.74454e-05	0.000726419	2.99669e-05	3.28775e-05	3.46608e-06	6.07574e-06	3.7288e-06	1.7138e-06		53.1255
		0.00139296	0.00137069	0.00498814	0.000234201	1	7.60875e-07	2.56649e-05	0.000629913	4.10755e-05	3.10993e-05	5.52358e-06	6.42812e-06	5.58914e-06	1.14358e-06		53.1233
		0.00148676	0.00134975	6.87498e-05	0.000241996	1	6.13243e-07	5.85127e-05	0.000665225	3.1864e-05	4.22498e-05	3.68551e-06	4.30688e-06	6.11291e-06	1.8223e-06		53.121
		0.00166931	0.0013242	7.50347e-05	0.00021813	1	2.02892e-06	2.82075e-05	0.000613886	3.43749e-05	3.18539e-05	7.07273e-06	7.18696e-06	4.41091e-06	1.95156e-06		53.1187
		0.00134182	0.00125654	4.89083e-05	0.000197764	1	7.08963e-07	1.76309e-05	0.00528741	3.34223e-05	3.58459e-05	1.20663e-05	7.98611e-06	5.05462e-06	1.48151e-06		53.1165
		0.00129883	0.00130387	4.68339e-05	0.000221208	1	5.93009e-07	1.60769e-05	0.000695097	3.08126e-05	3.01086e-05	5.36813e-06	1.04117e-06	4.63293e-06	2.41299e-06		53.1142
		0.0012269	0.00124559	4.20635e-05	0.00021015	1	-1.33548e-07	5.68702e-05	0.000567364	4.21762e-05	2.91037e-05	-4.27341e-08	2.99626e-06	5.36385e-06	3.14712e-06		53.112
		0.00131074	0.00132628	0.000101966	0.000211994	1	5.37215e-07	1.89288e-05	0.000592141	3.24968e-05	3.30326e-05	9.7668e-06	4.71613e-06	4.48652e-06	3.75823e-06		53.1097
		0.00136907	0.00131198	3.98458e-05	0.000232332	1	1.57779e-06	8.17314e-05	0.000677746	4.08964e-05	3.13844e-05	5.23413e-06	4.06081e-06	6.69849e-06	8.72135e-07		53.1074
		0.00136349	0.00132541	4.84538e-05	0.00024588	1	7.69943e-07	6.39409e-05	0.000594256	1.83876e-05	3.4838e-05	-4.63852e-08	7.58882e-06	3.82574e-06	1.38306e-06		53.1052
		0.00141851	0.00141809	3.71216e-05	0.000256427	1	4.41064e-07	3.43486e-05	0.000625126	4.14274e-05	2.68863e-05	5.30209e-06	8.22718e-06	5.99631e-06	1.31196e-06		53.1029
		0.00130741	0.00136937	4.83237e-05	0.000206716	1	7.04611e-07	3.03809e-05	0.000514208	2.74322e-05	3.30931e-05	1.19923e-05	4.96059e-06	4.11009e-06	2.29927e-06		53.1007
		0.00136837	0.00128309	4.68437e-05	0.000210896	1	6.48671e-07	3.47368e-05	0.000591571	4.12322e-05	3.15809e-05	6.29191e-06	6.39353e-06	5.74614e-06	2.68764e-06		53.0984
		0.00128199	0.00135521	5.35322e-05	0.000183302	1	-1.2245e-07	2.83824e-05	0.000675186	2.88811e-05	3.33927e-05	-3.91828e-08	2.74727e-06	4.49649e-06	4.41218e-06		53.0961
		0.00142314	0.00137356	7.82066e-05	0.000250636	1	8.69549e-07	2.46711e-05	0.000692432	3.42161e-05	3.49957e-05	8.81096e-06	7.15376e-06	4.39053e-06	7.47943e-06		53.0939
		0.00131557	0.00137741	0.000117283	0.00023212	1	4.42948e-07	2.37849e-05	0.000668918	3.65857e-05	3.07818e-05	7.11456e-06	4.13111e-06	5.38793e-06	6.26718e-06		53.0916
		0.00141166	0.0014308	5.00396e-05	0.000215698	1	4.23187e-07	2.85703e-05	0.00108115	2.92e-05	3.08318e-05	5.08718e-06	7.89371e-06	1.27206e-05	5.1651e-06		53.0894
		0.00126871	0.00135107	5.32223e-05	0.00022455	1	2.80318e-07	2.54575e-05	0.000697636	4.29565e-05	3.54606e-05	3.32874e-06	4.86243e-06	5.07342e-06	3.26692e-06		53.0871
		0.00128797	0.00126022	4.67547e-05	0.00017571	1	7.96963e-07	2.4018e-05	0.000672632	3.23794e-05	3.06473e-05	-3.43907e-08	3.21512e-06	5.05676e-06	2.3652e-06		53.0848
		0.0014194	0.00130182	5.42676e-05	0.000193506	1	6.39032e-06	0.000369563	0.000732711	3.45632e-05	3.40061e-05	4.03424e-06	3.91236e-06	4.56246e-06	2.95467e-06		53.0826
		0.00138591	0.00137556	6.15507e-05	0.000193893	1	4.1125e-07	4.07321e-05	0.000668774	2.65127e-05	2.97493e-05	6.60543e-06	3.83548e-06	5.88531e-06	2.82157e-06		53.0803
		0.00147746	0.00131289	5.60348e-05	0.000180183	1	1.48013e-07	3.55398e-05	0.000579668	3.16276e-05	2.96678e-05	3.43272e-06	2.00568e-06	4.30849e-06	2.74206e-06		53.078
		0.00131364	0.00119485	9.8127e-05	0.000229665	1	5.76736e-07	3.75739e-05	0.000867562	2.50468e-05	3.27654e-05	6.97571e-06	6.07578e-06	3.88423e-06	1.29186e-06		53.0758
		0.00126861	0.00131103	5.28753e-05	0.000183368	1	1.45646e-07	3.80796e-05	0.000511465	2.92038e-05	3.35736e-05	6.79804e-06	3.94732e-06	4.54246e-06	2.08138e-06		53.0735
		0.00131802	0.00134656	4.57806e-05	0.000198935	1	1.07045e-06	3.4557e-05	0.000612374	3.07366e-05	3.32161e-05	4.87464e-06	7.56391e-06	4.3521e-06	3.96421e-06		53.0713
		0.00138572	0.00135274	6.0875e-05	0.000183381	1	6.85774e-07	2.50983e-05	0.000644631	2.85756e-05	3.24227e-05	1.33451e-05	5.79365e-06	3.55568e-06	1.43305e-06		53.069
		0.00139303	0.00139196	5.65349e-05	0.000188562	1	2.60861e-07	2.4696e-05	0.00070327	3.20589e-05	3.52098e-05	9.37085e-06	5.43e-06	5.41572e-06	1.72021e-06		53.0667
		0.00134128	0.00137118	6.1543e-05	0.000211909	1	1.03905e-06	3.6434e-05	0.000649226	3.69703e-05	3.32606e-05	1.55104e-06	4.58869e-06	4.78781e-06	4.06006e-07		53.0645
		0.00130842	0.00136095	7.03058e-05	0.000188602	1	1.44958e-06	4.18678e-05	0.000557682	3.48536e-05	3.17323e-05	4.8088e-06	7.46174e-06	3.86394e-06	1.1899e-06		53.0622
		0.00143361	0.00137159	5.93008e-05	0.000230191	1	3.92709e-07	6.67463e-05	0.00076624	4.31151e-05	3.00338e-05	-3.91768e-08	7.3252e-06	3.51222e-06	7.86602e-07		53.06
		0.00124677	0.00131534	4.24372e-05	0.000207959	1	1.02881e-06	3.79274e-05	0.000751389	3.39567e-05	2.98063e-05	4.68504e-06	6.36094e-06	5.01956e-06	1.34861e-06		53.0577
		0.00142147	0.00130842	4.0219e-05	0.00019561	1	1.37211e-07	2.79521e-05	0.000926093	2.84159e-05	2.9772e-05	3.18219e-06	3.7187e-06	5.13541e-06	9.92359e-07		53.0555
		0.001406	0.00139267	0.000124992	0.00020131	1	3.8769e-07	2.55042e-05	0.000612463	3.72926e-05	3.29609e-05	-3.86761e-08	5.42366e-06	3.60603e-06	9.64884e-07		53.0532
		0.00133635	0.00125316	3.57484e-05	0.000207186	1	1.2789e-07	2.84607e-05	0.000656121	3.23804e-05	3.39055e-05	7.4708e-06	5.19916e-06	4.78654e-06	3.83345e-07		53.0509
		0.00130632	0.00139943	3.45744e-05	0.000207304	1	3.7507e-07	1.80354e-05	0.000618644	2.75797e-05	3.41211e-05	4.50877e-06	6.99619e-06	4.42807e-06	3.86881e-07		53.0487
		0.001333	0.00129757	3.49441e-05	0.000195255	1	1.34344e-07	2.33227e-05	0.000580501	3.13607e-05	3.11705e-05	1.53838e-06	9.10232e-07	3.07254e-06	2.29919e-06		53.0464
		0.00135501	0.00139422	4.44931e-05	0.000217226	1	9.1652e-07	2.09457e-05	0.000552691	2.82533e-05	3.02172e-05	3.16399e-06	2.77301e-06	4.68047e-06	7.94093e-07		53.0441
		0.00127168	0.00119896	3.45047e-05	0.000194365	1	6.19832e-07	1.83222e-05	0.000799865	3.93991e-05	2.54313e-05	6.01217e-06	2.61819e-06	4.28522e-06	1.29525e-06		53.0419
		0.00136028	0.00135339	3.61929e-05	0.000179896	1	7.56973e-07	0.00191617	0.000567363	4.18916e-05	3.03663e-05	1.50357e-06	6.2276e-06	4.09515e-06	5.7892e-07		53.0396
		0.00136941	0.00130782	3.4522e-05	0.000176312	1	8.47356e-07	2.70295e-05	0.000647098	#VALUE!	3.6761e-05	2.92522e-06	4.27299e-06	6.42584e-06	9.12225e-07		53.0374
		0.00137901	0.00130984	4.05293e-05	0.000199487	1	4.71147e-07	2.33399e-05	0.000692256	3.17161e-05	2.81438e-05	9.99911e-06	4.13613e-06	3.55392e-06	7.10652e-07		53.0351
		0.00134145	0.00129027	4.33488e-05	0.000168424	1	1.11567e-05	1.56193e-05	0.000677829	#VALUE!	3.35432e-05	6.90131e-06	6.40382e-06	4.05314e-06	4.19022e-06		53.0328
		0.00131485	0.0013294	4.05869e-05	0.000154035	1	1.06691e-06	1.72868e-05	0.00073483	4.02841e-05	3.2891e-05	5.77426e-06	4.19105e-06	3.85837e-06	8.9473e-07		53.0306
		0.00130269	0.00146221	5.27124e-05	0.000196321	1	5.21264e-07	3.03994e-05	0.000711222	3.77583e-05	3.29661e-05	1.54678e-06	6.40659e-06	6.17929e-06	1.54897e-06		53.0283
		0.00136934	0.00134979	3.8158e-05	0.000223551	1	5.02361e-07	2.65197e-05	0.000782028	2.69597e-05	2.9421e-05	1.49069e-06	1.76402e-06	4.19543e-06	1.4928e-06		53.0261
		0.00138457	0.00152286	3.46567e-05	0.000222495	1	5.29993e-07	2.98743e-05	0.00076019	1.93999e-05	3.37247e-05	4.79769e-06	3.7222e-06	5.28306e-06	7.99413e-07		53.0238
		0.00132903	0.00125625	3.79862e-05	0.000159978	1	4.90353e-07	7.66685e-05	0.000703332	3.88664e-05	3.15847e-05	1.45506e-06	8.6093e-07	4.22729e-06	1.27774e-06		53.0215
		0.00141129	0.00140284	3.91834e-05	0.000160339	1	3.78434e-07	3.78088e-05	0.000826239	3.03995e-05	3.26637e-05	1.06654e-05	3.52942e-06	3.38455e-06	1.12567e-06		53.0193
		0.00127797	0.00133552	4.18948e-05	0.000181215	1	1.01699e-06	0.000374492	0.000636813	2.75277e-05	2.47893e-05	1.35036e-06	3.99498e-06	5.76247e-06	1.51874e-06		53.017
		0.00145342	0.00135442	0.000254047	0.000220585	1	5.84057e-05	0.000261026	0.000797651	2.49105e-05	3.6761e-05	4.48722e-06	1.7408e-05	5.47547e-06	1.11033e-06		53.0148
		0.00140621	0.0013513	0.000222083	0.000199866	1	2.63882e-05	4.51177e-05	0.000671363	2.19246e-05	0.00015135	1.38892e-06	1.6436e-06	4.91799e-06	5.15829e-06		53.0125
		0.00140176	0.00141235	6.4695e-05	0.000180586	1	8.50993e-07	2.83488e-05	0.000590067	3.62429e-05	3.2058e-05	5.91243e-06	1.7165e-06	6.84863e-06	1.27376e-06		53.0102
		0.0012796	0.00126048	2.8869e-05	0.000196223	1	4.51915e-07	2.13587e-05	0.000616601	2.88792e-05	3.14874e-05	4.09089e-06	4.76081e-06	4.38298e-06	1.50822e-06		53.008
		0.00132001	0.0012847	2.3607e-05	0.0001982	1	9.71832e-07	3.26457e-05	0.000684135	3.12418e-05	3.25384e-05	1.4507e-06	1.03008e-05	6.9812e-06	1.45276e-06		53.0057
		0.00140079	0.00129097	2.41295e-05	0.000191218	1	1.20258e-06	1.66012e-05	0.000703501	2.9312e-05	3.13063e-05	2.91217e-06	5.95555e-06	4.17739e-06	1.26266e-06		53.0035
		0.00132373	0.00137257	3.47533e-05	0.000262047	1	2.4624e-07	3.18564e-05	0.000587314	3.77343e-05	2.97273e-05	8.84562e-06	2.56274e-06	4.58776e-06	1.08983e-06		53.0012
		0.0012974	0.00136351	2.93397e-05	0.00023555	1	7.26167e-07	1.09669e-05	0.000714197	2.52566e-05	3.39626e-05	-3.65159e-08	3.41379e-06	4.84532e-06	1.26661e-06		52.9989
		0.00150797	0.00140323	3.09744e-05	0.000219184	1	1.11885e-06	1.34102e-05	0.000788109	3.54105e-05	3.53707e-05	4.53202e-06	2.637e-06	4.5858e-06	1.30456e-06		52.9967
		0.00141002	0.00136932	3.23161e-05	0.000227357	1	3.4311e-07	1.69428e-05	0.000557964	3.06719e-05	2.74835e-05	2.7383e-06	3.19997e-06	4.41906e-06	5.20576e-07		52.9944
		0.00137106	0.00140014	4.76539e-05	0.00020496	1	8.2863e-07	2.49723e-05	0.000582879	3.20415e-05	2.8618e-05	1.41241e-06	6.68582e-06	4.61639e-06	8.92065e-07		52.9922
		0.00134458	0.00137867	8.92551e-05	0.000182429	1	1.23166e-07	2.54001e-05	0.000582041	3.60508e-05	3.1356e-05	5.74878e-06	1.66899e-06	4.09748e-06	7.16911e-07		52.9899
		0.00142044	0.00150742	3.4856e-05	0.000272417	1	-1.18745e-07	1.42056e-05	0.000707805	3.14596e-05	3.25796e-05	7.65661e-06	5.32848e-06	4.49673e-06	7.6292e-07		52.9876
		0.00140223	0.00153216	4.5173e-05	0.000252517	1	4.98859e-07	1.85501e-05	0.000532426	3.01766e-05	2.96047e-05	4.51585e-06	9.63503e-06	4.83828e-06	2.21238e-06		52.9854
		0.00133576	0.00133831	3.68336e-05	0.000201003	1	1.21964e-06	2.5144e-05	0.000713477	3.39206e-05	3.24208e-05	2.95346e-06	4.31425e-06	5.29598e-06	1.10079e-06		52.9831
		0.00133446	0.00120851	4.05784e-05	0.000255759	1	1.22239e-07	2.0761e-05	0.000585905	3.33645e-05	2.97407e-05	2.83496e-06	4.96944e-06	4.44795e-06	1.05662e-06		52.9808
		0.00125801	0.00133157	0.000221087	0.000208277	1	7.89268e-07	1.78902e-05	0.000460107	2.81986e-05	3.03514e-05	2.72469e-06	7.95998e-07	5.1301e-06	8.49689e-07		52.9786
		0.00132836	0.00136739	5.39882e-05	0.00023341	1	6.79206e-07	2.11921e-05	0.000707749	3.06053e-05	3.23868e-05	-3.41544e-08	3.99126e-06	4.77699e-06	5.19445e-07		52.9763
		0.00141189	0.00130887	5.45163e-05	0.000251308	1	2.72918e-06	2.1256e-05	0.000603855	2.73649e-05	3.45258e-05	7.25735e-06	4.20879e-06	4.64978e-06	1.07388e-06		52.9741
		0.00140569	0.00139694	4.91914e-05	0.000221071	1	1.33404e-06	2.72389e-05	0.000658491	3.45783e-05	3.19662e-05	1.45069e-06	6.867e-06	6.7176e-06	9.16239e-07		52.9718
		0.0013536	0.00131778	3.62232e-05	0.000216204	1	1.23582e-06	1.55159e-05	0.000554597	2.27591e-05	3.21731e-05	2.72178e-06	9.54231e-06	4.14833e-06	1.18011e-06		52.9695
		0.00135902	0.00129514	3.36226e-05	0.000210525	1	9.03878e-07	1.69081e-05	0.000715784	3.29368e-05	3.38981e-05	4.11611e-06	8.78215e-06	4.9001e-06	1.68385e-06		52.9673
		0.00140972	0.00149483	3.26895e-05	0.000240162	1	9.49895e-07	2.91109e-05	0.00133717	2.31983e-05	3.22697e-05	1.41796e-06	5.03403e-06	5.7934e-06	1.66348e-05		52.965
		0.00132413	0.00237339	4.29687e-05	0.000208414	1	1.69349e-06	2.11639e-05	0.000563576	3.45219e-05	3.0487e-05	2.9333e-06	1.02839e-05	3.55016e-06	2.70026e-06		52.9628
		0.00134265	0.00214441	2.90105e-05	0.000240279	1	6.42138e-07	1.84794e-05	0.000639615	3.37868e-05	3.64826e-05	3.09485e-06	7.23336e-06	4.8557e-06	1.90701e-06		52.9605
		0.00124393	0.00136279	0.000423203	0.000199109	1	1.05994e-06	1.3937e-05	0.000522778	3.75929e-05	3.33235e-05	2.85039e-06	9.16042e-06	6.64491e-06	1.40938e-06		52.9582
		0.00133163	0.00131898	3.43236e-05	0.000265622	1	8.75082e-07	1.9947e-05	0.000531387	3.18874e-05	3.15305e-05	1.30628e-06	5.41046e-06	2.065e-05	1.63021e-06		52.956
		0.00131869	0.00126235	2.75265e-05	0.000220599	1	3.66151e-06	2.07627e-05	0.000737489	3.47886e-05	3.16037e-05	4.06055e-06	2.36267e-06	7.49345e-06	1.00476e-06		52.9537
		0.00147316	0.00133144	2.93734e-05	0.000217293	1	1.16311e-06	2.666e-05	0.000633725	3.45121e-05	2.89506e-05	9.04607e-06	4.49034e-06	6.89077e-06	2.51407e-06		52.9515
		0.00135406	0.00136083	3.41866e-05	0.000242331	1	8.10376e-07	2.47249e-05	0.000667678	3.61017e-05	2.70805e-05	4.21383e-06	7.3559e-06	4.38927e-06	1.38325e-06		52.9492
		0.00132771	0.00135453	3.75526e-05	0.000248557	1	5.64158e-07	1.69706e-05	0.000664749	1.81044e-05	3.1964e-05	-3.39877e-08	9.53263e-06	6.33864e-06	2.503e-06		52.947
		0.00140924	0.00131349	3.36546e-05	0.000257041	1	5.83416e-07	6.00346e-05	0.000581124	2.75037e-05	3.05012e-05	1.38834e-06	8.21495e-06	6.42891e-06	1.048e-06		52.9447
		0.00136555	0.00129164	4.14033e-05	0.000261683	1	1.10805e-06	1.81145e-05	0.00145682	2.40702e-05	3.1453e-05	7.50541e-06	4.35265e-06	8.95094e-06	2.38024e-06		52.9424
		0.00141305	0.00161738	4.55167e-05	0.000259908	1	9.22297e-07	2.73597e-05	0.000706037	3.59832e-05	3.35031e-05	5.61174e-06	5.70238e-06	4.7499e-06	2.05763e-06		52.9402
		0.00144165	0.0014585	4.40745e-05	0.000273018	1	1.95179e-06	2.23601e-05	0.000591947	3.35768e-05	3.11224e-05	4.1961e-06	8.13889e-06	3.8712e-06	1.0383e-06		52.9379
		0.00141735	0.00127868	3.77752e-05	0.000238173	1	5.74468e-07	1.29388e-05	0.000652738	3.41571e-05	3.15602e-05	1.36705e-06	6.47109e-06	7.07527e-06	2.54874e-06		52.9357
		0.00144196	0.00133283	3.08127e-05	0.000231481	1	4.60577e-07	1.38336e-05	0.000700879	2.47173e-05	3.58632e-05	8.37349e-06	3.23469e-06	5.45988e-06	1.53713e-06		52.9334
		0.00141342	0.00118698	0.000447882	0.000276116	1	1.17061e-06	1.9686e-05	0.000726021	2.85325e-05	3.1853e-05	5.70504e-06	6.62541e-06	5.84571e-06	4.16263e-06		52.9311
		0.00138422	0.00124655	3.95376e-05	0.000462495	1	4.46554e-07	2.72043e-05	0.000648316	3.23466e-05	3.18104e-05	5.40114e-06	6.27248e-06	5.41398e-06	2.79724e-06		52.9289
		0.0013009	0.00126338	3.58605e-05	0.000234746	1	1.01475e-06	1.88031e-05	0.000619533	3.44404e-05	2.85392e-05	8.25507e-06	5.58067e-06	5.01559e-06	6.84885e-07		52.9266
		0.001334	0.0012836	0.000116904	0.000276684	1	5.96717e-07	1.82611e-05	0.00104615	2.40481e-05	3.26891e-05	7.2439e-06	1.00828e-05	4.89906e-06	1.422e-06		52.9243
		0.00128907	0.00127262	5.6433e-05	0.000246543	1	1.24912e-06	2.40164e-05	0.000520563	2.69094e-05	3.3412e-05	6.9294e-06	1.60741e-06	6.6601e-06	1.69518e-06		52.9221
		0.00131856	0.00135572	5.136e-05	0.000255925	1	3.46255e-07	2.45726e-05	0.000627376	3.17378e-05	2.8542e-05	6.96047e-06	4.84401e-06	6.44212e-06	1.53457e-06		52.9198
		0.00128828	0.00142624	3.22849e-05	0.000273348	1	4.97552e-07	2.0604e-05	0.000661475	2.83996e-05	2.72004e-05	-3.73777e-08	7.86247e-06	5.49596e-06	9.32492e-07		52.9176
		0.0014005	0.00141547	7.14972e-05	0.000302166	1	6.1445e-09	4.65927e-05	0.00077544	3.2194e-05	3.09771e-05	7.62614e-06	3.53815e-06	5.97211e-06	7.59884e-07		52.9153
		0.00131774	0.00144762	3.5616e-05	0.000304546	1	9.25959e-07	3.01955e-05	0.000619274	2.81774e-05	3.06393e-05	2.79944e-06	8.99669e-06	4.01569e-06	1.38418e-06		52.913
		0.00122707	0.00128555	3.84816e-05	0.000266548	1	7.92687e-07	2.38891e-05	0.00054168	2.5213e-05	2.83528e-05	5.50734e-06	2.39834e-06	4.90693e-06	1.18649e-06		52.9108
		0.00140436	0.00129024	0.00010042	0.00028753	1	9.52946e-07	3.06077e-05	0.000654081	3.30887e-05	2.87292e-05	1.16326e-05	6.73363e-06	6.07038e-06	8.98444e-07		52.9085
		0.00132546	0.00133345	4.2498e-05	0.000305164	1	1.52948e-06	3.36986e-05	0.00134467	7.3261e-05	2.85347e-05	4.2962e-06	3.33313e-06	5.24237e-06	1.41029e-06		52.9063
		0.00132697	0.00127539	4.49215e-05	0.000256175	1	1.48329e-06	8.24752e-05	0.000547539	2.70564e-05	2.73141e-05	2.7661e-06	4.04056e-06	5.08404e-06	1.87283e-06		52.904
		0.00133365	0.00129497	3.97373e-05	0.000248586	1	3.49905e-07	0.000170857	0.000593379	3.20723e-05	3.25565e-05	1.4103e-05	9.79037e-06	4.25617e-06	1.89072e-06		52.9017
		0.00136436	0.00137027	3.6115e-05	0.000273395	1	1.67186e-06	2.13635e-05	0.000724826	3.32588e-05	2.83135e-05	8.76022e-06	5.07616e-06	4.41363e-06	9.03062e-07		52.8995
		0.00144011	0.00132357	4.54094e-05	0.000272472	1	4.04836e-06	1.79586e-05	0.000642016	2.40773e-05	3.20422e-05	4.48957e-06	6.9664e-06	4.14194e-06	1.83663e-06		52.8972
		0.00130337	0.00129973	3.87055e-05	0.000175179	1	2.05376e-06	1.54851e-05	0.000612519	2.70839e-05	2.64441e-05	2.76891e-06	3.23574e-06	4.34432e-06	1.26653e-05		52.895
		0.0013757	0.00266752	3.86108e-05	0.000296241	1	2.41276e-07	1.74176e-05	0.00056714	2.15174e-05	3.12651e-05	1.41465e-06	6.69644e-06	4.3668e-06	2.46308e-06		52.8927
		0.00133916	0.00125061	5.56501e-05	0.000216358	1	5.91909e-07	2.69108e-05	0.000523212	3.68141e-05	2.94649e-05	5.74133e-06	4.16714e-06	5.37123e-06	1.58419e-06		52.8904
		0.00128819	0.00119839	4.36413e-05	0.000311631	1	7.12072e-07	1.40064e-05	0.00118373	2.31398e-05	2.93082e-05	8.66561e-06	5.02134e-06	3.85224e-06	1.9395e-06		52.8882
		0.00127992	0.00133999	4.97052e-05	0.000219508	1	1.16754e-06	0.00173653	0.000789917	3.64857e-05	2.71852e-05	2.82732e-06	1.07384e-05	6.84468e-06	1.05377e-06		52.8859
		0.00121348	0.00123112	5.00824e-05	0.000224141	1	1.90512e-06	3.62015e-05	0.000569884	2.96857e-05	2.7468e-05	2.71918e-06	3.97202e-06	4.63204e-06	1.84106e-06		52.8837
		0.00138149	0.00135885	5.02464e-05	0.000257622	1	7.2427e-07	0.000329624	0.000610639	2.76723e-05	3.04716e-05	2.91364e-06	1.70239e-06	6.79235e-06	1.08595e-06		52.8814
		0.00130615	0.00125428	3.17873e-05	0.000245508	1	8.21001e-07	0.000263892	0.000701163	3.01371e-05	2.67923e-05	4.26907e-06	2.48401e-06	5.59053e-06	1.91896e-06		52.8791
		0.00133642	0.00140552	4.00708e-05	0.000226351	1	8.25425e-07	5.34239e-05	0.00078783	2.62542e-05	2.99858e-05	8.62007e-06	2.49739e-06	4.59854e-06	1.06205e-06		52.8769
		0.00141964	0.00142829	4.08711e-05	0.000252795	1	2.9247e-06	2.64745e-05	0.000568568	3.81888e-05	2.96056e-05	5.95572e-06	8.64577e-06	4.51033e-06	2.18376e-06		52.8746
		0.00155761	0.00139605	8.83693e-05	0.00022911	1	1.55839e-06	2.41123e-05	0.000718953	3.2552e-05	3.45411e-05	2.90615e-06	8.49009e-07	4.82024e-06	1.61384e-06		52.8724
		0.0014051	0.00145268	3.47027e-05	0.000271219	1	1.24976e-06	3.62479e-05	0.000634275	3.30398e-05	2.75297e-05	3.02642e-06	4.42081e-06	5.5625e-06	1.12798e-06		52.8701
		0.00132496	0.00142285	7.41942e-05	0.000208857	1	4.77057e-07	7.73905e-05	0.000759317	1.74622e-05	2.84038e-05	1.4156e-06	5.86327e-06	5.65524e-06	2.46474e-06		52.8678
		0.00149169	0.00142394	0.000183122	0.000265439	1	1.48644e-06	2.52328e-05	0.000620437	4.38555e-05	2.85733e-05	3.00205e-06	2.63108e-06	9.96041e-06	2.03258e-06		52.8656
		0.00145227	0.00145452	0.000332602	0.00024667	1	1.48171e-06	7.70412e-05	0.000601056	1.99254e-05	3.21698e-05	4.50745e-06	4.37126e-06	4.69512e-06	2.39041e-06		52.8633
		0.0014696	0.00155925	0.000118606	0.000237891	1	1.30111e-07	7.73585e-05	0.00074651	2.69456e-05	2.82316e-05	3.01754e-06	7.05268e-06	4.05795e-06	2.41042e-06		52.861
		0.00137954	0.00146749	0.000109876	0.00030015	1	1.85991e-06	0.000249991	0.000840252	2.34404e-05	2.7065e-05	3.00748e-06	2.63584e-06	5.93225e-06	2.40238e-06		52.8588
		0.00159265	0.00148844	3.92609e-05	0.00029721	1	4.01703e-06	2.74823e-05	0.000623154	3.5262e-05	2.96572e-05	6.3357e-06	4.59855e-06	5.78614e-06	1.7482e-06		52.8565
		0.00144226	0.00147936	0.000106901	0.000260202	1	3.87092e-07	0.0014954	0.000674412	2.67094e-05	3.0706e-05	9.34548e-06	5.4153e-06	4.57e-06	5.87306e-07		52.8543
		0.00148945	0.00152395	0.000580959	0.000226046	1	2.4709e-07	0.000136222	0.00101611	2.28689e-05	2.79271e-05	7.39057e-06	3.42886e-06	4.34048e-06	3.23689e-06		52.852
		0.00143894	0.00149086	4.09243e-05	0.000229285	1	2.52593e-07	0.000126942	0.000646085	4.21149e-05	3.15643e-05	9.07385e-06	4.38152e-06	5.24407e-06	1.48311e-06		52.8498
		0.00147222	0.00150992	0.0003246	0.000264644	1	3.53791e-06	9.79087e-05	0.00083384	3.2135e-05	3.06214e-05	3.92349e-06	4.56599e-06	5.25476e-06	1.28794e-06		52.8475
		0.00142011	0.00136442	0.000335594	0.000213276	1	9.62137e-07	0.000140655	0.000549786	2.23698e-05	2.71434e-05	-3.23422e-08	7.5592e-06	5.45164e-06	2.0668e-06		52.8452
		0.0016968	0.00148603	0.000147397	0.000259687	1	1.04967e-06	4.86641e-05	0.000628176	2.02294e-05	3.12337e-05	4.78003e-06	4.63561e-06	5.26362e-06	3.50088e-06		52.843
		0.00135791	0.00149083	5.49089e-05	0.000323378	1	1.81512e-05	3.39101e-05	0.00061587	3.21387e-05	3.11199e-05	4.55262e-06	6.18115e-06	3.38709e-06	2.04641e-06		52.8407
		0.00151465	0.0014948	6.59527e-05	0.000351631	1	1.78234e-06	0.000103255	0.000628932	3.43987e-05	3.07735e-05	6.68928e-06	6.79732e-06	5.66196e-06	1.23881e-06		52.8385
		0.00131891	0.00149173	0.000406273	0.000271002	1	2.92298e-06	3.12808e-05	0.000646736	2.66797e-05	3.07719e-05	3.08587e-06	8.11399e-06	4.14985e-06	1.15014e-06		52.8362
		0.0015447	0.00157905	6.61837e-05	0.000295902	1	2.67332e-07	3.93969e-05	0.000776115	2.6545e-05	3.18618e-05	6.38891e-06	5.56468e-06	4.26907e-06	9.89971e-07		52.8339
		0.00142462	0.00153208	0.00026282	0.000249468	1	1.61119e-06	3.92402e-05	0.000883153	3.36548e-05	3.02538e-05	3.00461e-06	7.02245e-06	5.38769e-06	3.68044e-06		52.8317
		0.00145436	0.00136897	7.3623e-05	0.000263525	1	7.72256e-07	4.71352e-05	0.000759526	4.00908e-05	3.00728e-05	-3.88335e-08	4.53806e-06	5.57072e-06	3.04899e-06		52.8294
		0.00149561	0.00139022	6.94317e-05	0.000302721	1	9.97306e-07	3.07271e-05	0.00078977	3.37729e-05	2.7916e-05	6.06814e-06	7.04709e-06	5.2714e-06	2.40851e-06		52.8272
		0.00133479	0.00140695	5.75006e-05	0.000230949	1	8.3589e-07	0.000172615	0.000629949	3.23222e-05	2.87752e-05	7.26836e-06	6.7444e-06	7.63291e-06	2.30506e-06		52.8249
		0.00145431	0.00145608	6.54532e-05	0.000292621	1	9.75676e-07	4.29967e-05	0.000686841	3.05278e-05	3.36239e-05	7.42984e-06	5.17066e-06	6.0829e-06	1.45851e-06		52.8226
		0.00151619	0.00143854	0.000129378	0.00032424	1	9.91294e-07	4.90425e-05	0.000828599	3.78242e-05	3.50372e-05	7.54878e-06	5.25343e-06	4.8365e-06	3.30618e-06		52.8204
		0.00154253	0.00143358	7.84667e-05	0.000284168	1	1.63405e-06	5.27578e-05	0.000609647	2.44705e-05	2.88663e-05	8.56209e-06	4.96136e-06	4.44072e-06	2.60549e-06		52.8181
		0.00156939	0.00155648	7.32185e-05	0.000285143	1	1.06244e-06	3.70045e-05	0.000573864	2.87578e-05	3.24752e-05	1.00895e-05	6.67772e-06	6.1481e-06	1.76052e-06		52.8158
		0.00140266	0.00143493	8.66625e-05	0.000301238	1	1.45948e-06	3.33892e-05	0.000574896	2.71581e-05	3.12093e-05	2.94761e-06	3.44457e-06	5.15332e-06	2.17514e-06		52.8136
		0.00150999	0.00142808	7.14392e-05	0.000282445	1	2.13762e-06	4.26332e-05	0.000679443	2.98264e-05	3.14491e-05	5.80013e-06	5.89381e-06	7.36473e-06	2.82846e-06		52.8113
		0.0013701	0.00141355	8.13796e-05	0.000325243	1	1.84891e-06	0.000242286	0.000643967	3.17899e-05	3.17518e-05	7.53043e-06	6.11408e-06	4.42262e-06	1.84221e-06		52.8091
		0.00145402	0.00143438	7.77827e-05	0.000246367	1	2.20087e-06	2.92754e-05	0.000690916	2.39692e-05	3.11286e-05	4.46942e-06	6.06819e-06	7.18345e-06	2.73151e-06		52.8068
		0.00149428	0.00143144	0.000219454	0.000252892	1	1.9771e-06	3.15072e-05	0.000788409	3.0006e-05	2.85973e-05	8.53659e-06	4.12209e-06	4.554e-06	2.59773e-06		52.8045
		0.00135606	0.0013532	7.03552e-05	0.000266157	1	2.78622e-06	0.000196059	0.00075484	2.11724e-05	2.96666e-05	4.24639e-06	3.29449e-06	5.68723e-06	8.79155e-07		52.8023
		0.00149733	0.0014	8.66162e-05	0.000284822	1	9.21836e-07	0.000310689	0.000640834	3.7548e-05	3.30343e-05	1.37607e-06	6.5138e-06	6.12216e-06	2.0566e-06		52.8
		0.00143858	0.00137457	8.94587e-05	0.000310093	1	1.36621e-06	5.20305e-05	0.000794978	2.15056e-05	3.09152e-05	1.11409e-05	9.67366e-06	6.8036e-06	2.03614e-06		52.7978
		0.00150337	0.00153537	9.22848e-05	0.00031088	1	1.08658e-06	5.98525e-05	0.000680387	2.27744e-05	3.5678e-05	8.83946e-06	6.82946e-06	7.33606e-06	1.08908e-06		52.7955
		0.00143683	0.00155333	0.00010068	0.000263701	1	1.40985e-06	6.49627e-05	0.000870068	3.18935e-05	3.08867e-05	2.84736e-06	2.49551e-06	6.76553e-06	1.5812e-06		52.7932
		0.00153998	0.00145959	0.000102384	0.000283568	1	7.37276e-07	5.86618e-05	0.000638857	2.5643e-05	3.63105e-05	2.96596e-06	6.06555e-06	7.31332e-06	2.73033e-06		52.791
		0.00152383	0.0014448	0.000216027	0.000302502	1	1.72915e-06	4.56031e-05	0.000740513	3.05248e-05	3.13276e-05	8.45832e-06	3.26746e-06	9.77856e-06	1.8931e-06		52.7887
		0.0014912	0.00147879	0.000102392	0.000244436	1	1.93688e-06	0.000138076	0.000748244	4.11703e-05	3.09743e-05	1.11621e-05	1.21153e-05	6.32072e-06	1.53519e-06		52.7865
		0.00150686	0.0015368	0.000156916	0.000320731	1	8.22312e-07	4.55308e-05	0.000528901	3.09912e-05	3.16221e-05	7.15029e-06	5.80543e-06	7.38161e-06	1.23083e-06		52.7842
		0.00151659	0.00143753	0.000141767	0.000273034	1	1.44108e-06	6.56865e-05	0.000664833	2.47605e-05	3.28129e-05	6.76899e-06	7.06621e-06	5.30086e-06	1.49236e-06		52.782
		0.00158244	0.00155026	0.000193746	0.000294643	1	2.11365e-06	5.65161e-05	0.000605519	3.67741e-05	3.21132e-05	7.17773e-06	5.82772e-06	6.89878e-06	1.9294e-06		52.7797
		0.00151111	0.0014287	0.000128776	0.000300443	1	3.51859e-07	4.77781e-05	0.000678368	2.66702e-05	3.22828e-05	1.276e-05	9.0246e-06	6.92415e-06	1.73034e-06		52.7774
		0.00141411	0.00149548	0.000100355	0.00026736	1	2.24768e-06	6.65325e-05	0.000603481	8.40218e-05	2.98579e-05	1.34698e-06	7.17314e-06	8.07249e-06	2.01312e-06		52.7752
		0.00153856	0.00171099	0.00019893	0.000283242	1	8.42335e-07	0.000140166	0.00079551	3.17458e-05	8.75375e-05	7.32439e-06	8.4956e-06	7.95257e-06	3.38493e-06		52.7729
		0.00139919	0.001514	0.000124552	0.000287849	1	9.65594e-07	0.000131016	0.00078164	3.35279e-05	3.06252e-05	8.83109e-06	7.67593e-06	6.15095e-06	1.79882e-06		52.7706
		0.00141673	0.00155977	0.000131044	0.000314834	1	1.51843e-06	0.000185469	0.000807595	4.69946e-05	3.05322e-05	2.00352e-05	5.79083e-06	7.744e-06	1.91719e-06		52.7684
		0.00149957	0.00154328	0.000257908	0.000293521	1	1.28896e-06	0.000334618	0.00322441	2.53496e-05	3.30961e-05	1.40167e-06	4.9762e-06	6.99981e-06	3.82298e-06		52.7661
		0.00156294	0.00145171	0.000174497	0.000268905	1	8.09656e-07	0.000275294	0.000927277	1.94043e-05	3.45812e-05	8.45539e-06	1.06159e-05	7.5187e-06	2.06258e-06		52.7639
		0.00157713	0.00151321	0.000208175	0.000308463	1	1.12743e-06	0.000560614	0.00116792	2.36045e-05	2.86415e-05	5.49463e-06	6.38105e-06	6.1198e-06	1.68231e-06		52.7616
		0.00158419	0.00149302	0.000194455	0.000303496	1	1.13332e-06	0.000274833	0.000926449	4.08715e-05	3.02153e-05	5.52333e-06	7.21623e-06	6.02871e-06	2.19227e-06		52.7593
		0.00144771	0.00133684	0.000173814	0.000295735	1	3.29726e-07	0.000141187	0.000850036	3.5453e-05	3.2045e-05	9.2927e-06	6.91922e-06	5.78058e-06	1.94186e-06		52.7571
		0.00153556	0.00144525	0.00036856	0.000294702	1	1.27932e-06	0.000123383	0.000754411	#VALUE!	2.9467e-05	1.13764e-05	7.40853e-06	6.69475e-06	1.39315e-06		52.7548
		0.00147382	0.00154118	0.000201528	0.000275014	1	1.40664e-06	0.000116828	0.000735861	3.42408e-05	2.99872e-05	4.27908e-06	1.07899e-05	7.13232e-06	3.47989e-06		52.7526
		0.0015943	0.00150136	0.000298585	0.000304978	1	1.93221e-06	0.000175664	0.000770507	3.71554e-05	3.1168e-05	5.5503e-06	5.63995e-06	6.67649e-06	1.53148e-06		52.7503
		0.00151717	0.00163741	0.000394728	0.000273556	1	1.55448e-06	0.00011908	0.000807086	3.01591e-05	3.18272e-05	6.78192e-06	3.93307e-06	7.36357e-06	1.82301e-06		52.748
		0.00160179	0.00159695	0.00223386	0.000317294	1	1.62999e-06	0.000380507	0.00152007	3.48308e-05	3.93291e-05	1.13996e-05	6.59873e-06	7.97451e-06	3.28648e-06		52.7458
		0.00161872	0.00151213	0.000288818	0.000345265	1	2.43663e-06	0.000121512	0.00109843	3.23517e-05	3.02817e-05	-3.52108e-08	9.05267e-06	6.69306e-06	1.3928e-06		52.7435
		0.00162378	0.00160208	0.000230329	0.00030187	1	7.09302e-07	0.000105081	0.000656112	3.11512e-05	2.90091e-05	5.74266e-06	6.6691e-06	7.41972e-06	1.41087e-06		52.7413
		0.00150389	0.00146256	0.000281028	0.000285906	1	4.97585e-07	0.000241853	0.00119222	2.24584e-05	3.24384e-05	1.20743e-05	8.73671e-06	6.70313e-06	2.20673e-06		52.739
		0.0013853	0.00165462	0.000284727	0.000306533	1	2.1582e-06	0.000247313	0.000770261	2.61843e-05	3.67044e-05	2.75696e-06	8.05466e-06	8.65263e-06	2.70576e-06		52.7367
		0.00164042	0.00182396	0.000354189	0.000283679	1	2.16027e-06	0.000168843	0.000771001	2.30755e-05	3.23518e-05	6.95092e-06	4.03108e-06	8.16587e-06	2.54037e-06		52.7345
		0.00155177	0.00152591	0.000349431	0.000300956	1	1.99693e-06	0.000111596	0.000744362	3.55078e-05	2.8506e-05	2.6923e-06	7.07912e-06	7.24223e-06	1.16733e-06		52.7322
		0.00143544	0.00158915	0.00028387	0.000307896	1	2.48247e-06	0.000100297	0.000773406	2.99096e-05	3.14072e-05	6.90074e-06	8.80466e-06	6.87827e-06	2.35525e-06		52.73
		0.00139958	0.00153912	0.000283026	0.000306539	1	1.63455e-06	8.55546e-05	0.000869157	2.96051e-05	3.27863e-05	2.64306e-06	7.7219e-06	6.51714e-06	2.27218e-06		52.7277
		0.00145077	0.00150871	0.000237021	0.00032633	1	1.60782e-06	9.52919e-05	0.00076187	3.04034e-05	2.83127e-05	4.19479e-06	8.95002e-06	6.49228e-06	2.2246e-06		52.7254
		0.00152036	0.00139476	0.000269845	0.000275438	1	8.04286e-07	8.45961e-05	0.000654585	3.18886e-05	3.05687e-05	1.5428e-05	4.05581e-06	6.59725e-06	2.0489e-06		52.7232
		0.0014852	0.00155715	0.000286113	0.00030273	1	3.6475e-07	8.64798e-05	0.000703222	1.85564e-05	2.85562e-05	2.91101e-06	6.80369e-06	7.56947e-06	1.08497e-06		52.7209
		0.00169194	0.00159254	0.000528662	0.000328077	1	1.89502e-06	8.77004e-05	0.00101175	3.38158e-05	3.24729e-05	8.69205e-06	6.71557e-06	6.95602e-06	2.12031e-06		52.7186
		0.00153409	0.00139695	0.000223527	0.00037615	1	2.54581e-06	0.000183534	0.000508568	3.39207e-05	3.19445e-05	5.40909e-06	3.92601e-06	4.57838e-06	1.81973e-06		52.7164
		0.0015465	0.0014879	0.000289672	0.000295355	1	1.90606e-06	8.99381e-05	0.000731781	2.49866e-05	2.93814e-05	4.35313e-06	8.44346e-06	6.47814e-06	5.49423e-07		52.7141
		0.00160266	0.00158499	0.000248487	0.000293706	1	1.62694e-06	0.000193584	0.00083883	2.6231e-05	3.27141e-05	7.64198e-06	9.75042e-06	6.25659e-06	3.16231e-06		52.7119
		0.00159249	0.0015157	0.000257687	0.000274767	1	3.61703e-06	0.000200811	0.000622369	3.36392e-05	3.23418e-05	5.89468e-06	4.27845e-06	6.56537e-06	2.33966e-06		52.7096
		0.00151709	0.00156554	0.000683876	0.00028541	1	2.8782e-06	0.000233456	0.00097462	2.43517e-05	3.22516e-05	8.80982e-06	6.80656e-06	5.09148e-06	2.85815e-06		52.7073
		0.00159587	0.00166319	0.000770792	0.000320271	1	1.66302e-06	0.000238017	0.00106458	3.22649e-05	3.25545e-05	2.88053e-06	6.73244e-06	6.06931e-06	1.42428e-06		52.7051
		0.00140997	0.00168081	0.000305632	0.000338771	1	7.07808e-07	0.000277476	0.000778966	3.27026e-05	3.24573e-05	1.14969e-05	8.31892e-06	5.48883e-06	1.58122e-06		52.7028
		0.00159192	0.00153519	0.000333694	0.000359543	1	9.60855e-07	0.000348342	0.000963726	3.25385e-05	3.03807e-05	8.78775e-06	1.01845e-05	5.20898e-06	1.08271e-06		52.7006
		0.00155853	0.00168846	0.000337605	0.000283316	1	2.48545e-06	0.000317622	0.000911433	3.70792e-05	3.21001e-05	8.69205e-06	1.67883e-06	5.66759e-06	2.29521e-06		52.6983
		0.00163467	0.00161225	0.000394193	0.000314039	1	1.3253e-06	0.000366443	0.00102779	2.27496e-05	2.91064e-05	7.35201e-06	8.52764e-06	6.41185e-06	2.33159e-06		52.696
		0.00160848	0.00151061	0.00035934	0.000298538	1	1.39162e-06	0.000313499	0.000972215	2.99793e-05	3.20538e-05	3.06492e-06	6.26794e-06	6.04555e-06	2.26171e-06		52.6938
		0.00147003	0.00162291	0.000321231	0.000308017	1	1.69049e-06	0.000335618	0.00100549	2.44844e-05	3.0338e-05	7.37531e-06	2.56627e-06	6.03826e-06	3.58672e-06		52.6915
		0.00162076	0.00157154	0.000336168	0.000293194	1	1.19877e-06	0.000386422	0.00138546	3.41645e-05	3.1207e-05	8.78167e-06	7.63297e-06	6.11653e-06	1.96547e-06		52.6893
		0.00153181	0.0015083	0.00027907	0.000355132	1	2.06018e-06	0.000326182	0.00106963	2.95971e-05	3.33276e-05	1.45187e-06	4.2953e-06	5.66826e-06	2.34887e-06		52.687
		0.00161365	0.00154911	0.000519627	0.00032777	1	5.98756e-07	0.000253958	0.000789456	4.6254e-05	3.24264e-05	1.16517e-05	4.21535e-06	5.04519e-06	2.1295e-06		52.6847
		0.00147948	0.00149742	0.000215878	0.000276926	1	9.7641e-07	0.00018932	0.000962151	3.30652e-05	3.1447e-05	7.43543e-06	1.03494e-05	8.47029e-06	2.53775e-06		52.6825
		0.00158617	0.00159429	0.000606598	0.000357187	1	9.73411e-07	0.00145087	0.000736607	2.96214e-05	3.16367e-05	5.92275e-06	7.73808e-06	7.65241e-06	3.24654e-06		52.6802
		0.00145545	0.00144215	0.00015633	0.000310826	1	8.46286e-07	0.000139868	0.000773747	3.93607e-05	2.9891e-05	2.92153e-06	1.19499e-05	6.41773e-06	2.86728e-06		52.678
		0.00145743	0.00142329	0.000152168	0.00037447	1	5.80009e-07	6.0442e-05	0.000699688	2.89305e-05	3.24993e-05	7.04108e-06	8.16698e-06	5.13791e-06	3.93472e-06		52.6757
		0.00163504	0.00151686	0.000144453	0.000369146	1	8.51585e-07	0.000131458	0.000923979	3.54333e-05	3.46552e-05	1.187e-05	7.72996e-06	5.79879e-06	4.85389e-06		52.6734
		0.00155067	0.00161316	0.00015004	0.000341294	1	1.26886e-07	6.10742e-05	0.000805041	3.71396e-05	3.58352e-05	-3.67841e-08	8.59739e-06	7.51998e-06	4.50038e-06		52.6712
		0.00154399	0.00135769	0.000126392	0.000322627	1	7.0983e-07	7.35156e-05	0.000806112	4.49589e-05	3.10681e-05	1.00839e-05	9.177e-06	7.16914e-06	4.8886e-06		52.6689
		0.0015183	0.00144134	0.000151407	0.000312104	1	9.1858e-07	0.000136133	0.000638571	3.18955e-05	2.97646e-05	2.77714e-06	8.1136e-06	6.10053e-06	4.58528e-06		52.6667
		0.0015318	0.00147116	0.000224929	0.000367117	1	1.60372e-06	7.7847e-05	0.000646805	3.11144e-05	3.47282e-05	9.80943e-06	6.49238e-06	6.60027e-06	5.432e-06		52.6644
		0.00147878	0.00151222	0.000153985	0.000315122	1	1.20261e-06	6.80451e-05	0.000732293	3.56842e-05	3.09649e-05	3.98952e-06	3.86898e-06	6.64968e-06	6.79211e-06		52.6621
		0.00148402	0.00138681	0.000140651	0.000283664	1	9.91459e-07	8.03662e-05	0.000644089	3.59211e-05	3.23815e-05	4.01601e-06	2.33676e-06	6.81339e-06	7.81131e-06		52.6599
		0.00153415	0.0014243	0.000171777	0.000321805	1	1.45777e-06	6.33499e-05	0.000704161	3.43097e-05	3.08115e-05	2.7185e-06	7.14803e-06	6.58125e-06	5.81258e-06		52.6576
		0.00151417	0.00145724	0.000140484	0.000366201	1	1.33563e-06	5.93485e-05	0.000635945	2.63851e-05	3.32862e-05	1.08915e-05	4.72844e-06	7.01422e-06	8.88847e-06		52.6554
		0.00149379	0.00134041	0.000500142	0.000361889	1	1.23768e-06	7.1213e-05	0.000555435	3.74989e-05	3.48752e-05	8.24609e-06	1.03532e-05	5.74349e-06	7.9861e-06		52.6531
		0.00147697	0.00155137	0.000148094	0.000363708	1	5.81556e-07	0.000104744	0.000644487	3.13951e-05	3.08585e-05	9.8979e-06	4.91318e-06	6.53411e-06	7.69961e-06		52.6508
		0.00149119	0.00150166	0.000127632	0.000350763	1	6.94386e-07	0.000374779	0.000788573	3.4462e-05	3.68271e-05	1.12789e-05	4.89662e-06	5.38475e-06	8.52417e-06		52.6486
		0.00138729	0.0014386	0.000133476	0.000311198	1	5.07283e-06	5.49326e-05	0.000645937	2.29103e-05	3.73661e-05	6.90116e-06	4.80273e-06	6.63295e-06	8.69442e-06		52.6463
		0.00151247	0.00156913	0.000605263	0.000350901	1	1.12508e-06	0.000502743	0.00088051	4.5058e-05	3.58622e-05	9.15262e-06	6.18744e-06	8.00301e-06	9.78528e-06		52.6441
		0.00151732	0.00139347	0.000243982	0.00033701	1	1.05866e-06	8.00937e-05	0.00101904	3.10805e-05	3.59621e-05	8.61232e-06	7.48577e-06	5.36029e-06	1.19818e-05		52.6418
		0.0015414	0.00139051	0.000241427	0.000369937	1	1.734e-06	5.48452e-05	0.000673142	3.62004e-05	3.23852e-05	3.00347e-06	5.26481e-06	7.4058e-06	1.19088e-05		52.6395
		0.00153031	0.00135659	0.000343435	0.000347254	1	2.51208e-06	6.07446e-05	0.000574853	3.83011e-05	3.3857e-05	2.90409e-06	7.636e-06	6.3794e-06	1.45219e-05		52.6373
		0.0015068	0.00144121	0.000161123	0.000339877	1	1.65762e-06	0.000486673	0.000843932	3.46059e-05	3.34733e-05	5.77838e-06	2.51637e-06	5.40589e-06	1.10345e-05		52.635
		0.00136784	0.00133888	0.000521858	0.000331878	1	1.41687e-06	9.6203e-05	0.000891051	4.34281e-05	3.80039e-05	1.44515e-05	6.68808e-06	6.67091e-06	1.16946e-05		52.6328
		0.00150199	0.00148798	0.000276235	0.000390556	1	1.36658e-06	8.3367e-05	0.000875914	4.90964e-05	3.58703e-05	1.06285e-05	7.91388e-06	5.80179e-06	2.53204e-05		52.6305
		0.00154328	0.00155599	0.000143591	0.000352867	1	2.01704e-06	0.000183278	0.000721014	3.25197e-05	4.15106e-05	4.60658e-06	7.14797e-06	7.81534e-06	1.38028e-05		52.6282
		0.00138938	0.00145632	0.000124424	0.000341182	1	1.22111e-06	6.20126e-05	0.00103263	3.64805e-05	3.64892e-05	7.4482e-06	9.50317e-06	5.96535e-06	1.875e-05		52.626
		0.00145981	0.00161963	0.000433325	0.000347989	1	1.20178e-06	5.48778e-05	0.00094008	3.50767e-05	3.49673e-05	2.91023e-06	4.2511e-06	7.17592e-06	1.59709e-05		52.6237
		0.00146536	0.00136261	0.000360159	0.000329329	1	1.19106e-06	8.59986e-05	0.000763878	2.65744e-05	3.78376e-05	1.3106e-05	7.58389e-06	6.85322e-06	1.56527e-05		52.6215
		0.00170015	0.00136621	0.000243537	0.000359084	1	1.78556e-06	8.89103e-05	0.000672289	3.31602e-05	3.40355e-05	5.81075e-06	8.43532e-06	7.24874e-06	1.63725e-05		52.6192
		0.00141731	0.00141578	0.000484799	0.000277195	1	8.27037e-06	4.28538e-05	0.000663231	2.85067e-05	3.48218e-05	9.46724e-06	6.2659e-06	6.49025e-06	1.32426e-05		52.6169
		0.0014562	0.00150506	0.000104182	0.000293852	1	4.70167e-07	4.73105e-05	0.000682598	4.44879e-05	3.50511e-05	1.14089e-05	4.12753e-06	6.5872e-06	1.72281e-05		52.6147
		0.0015362	0.00156292	0.0010548	0.000372897	1	9.54925e-07	7.29157e-05	0.00068063	#VALUE!	3.59061e-05	2.88702e-06	8.43462e-06	5.69463e-06	1.79541e-05		52.6124
		0.00135948	0.00152435	0.000762068	0.000319213	1	1.23692e-06	4.76786e-05	0.000737332	2.89669e-05	3.67987e-05	6.8617e-06	6.36706e-06	5.73992e-06	1.32904e-05		52.6101
		0.00142299	0.00140088	0.000109384	0.000303491	1	1.89201e-06	6.04718e-05	0.000609572	3.78349e-05	3.45618e-05	5.77348e-06	4.19048e-06	5.40131e-06	1.53936e-05		52.6079
		0.00142214	0.00146835	0.000129476	0.000381341	1	8.47361e-07	3.83621e-05	0.000689642	5.10406e-05	3.72359e-05	1.44434e-06	8.5463e-06	7.21292e-06	1.1955e-05		52.6056
		0.00145142	0.00145171	0.000103171	0.000360047	1	1.6066e-06	4.90276e-05	0.000828346	3.69619e-05	3.88179e-05	4.51281e-06	7.87783e-06	7.5219e-06	1.57118e-05		52.6034
		0.00158379	0.00150455	0.000109346	0.000351693	1	1.96941e-06	5.14534e-05	0.000608457	2.66649e-05	3.78168e-05	6.00968e-06	1.0469e-05	7.49691e-06	1.38406e-05		52.6011
		0.0014358	0.00141614	0.000101704	0.000351499	1	9.67464e-07	0.000171133	0.000561967	3.77454e-05	3.46694e-05	5.88656e-06	5.12714e-06	5.63825e-06	1.32008e-05		52.5988
		0.00148433	0.00148452	0.000117241	0.00034994	1	6.07219e-07	4.39266e-05	0.000911292	4.27525e-05	3.3929e-05	8.85311e-06	4.27493e-06	5.37894e-06	1.42776e-05		52.5966
		0.00136616	0.00154523	0.000165471	0.000325455	1	3.05133e-06	5.34394e-05	0.000779766	4.56863e-05	4.46111e-05	5.73646e-06	5.82911e-06	6.38915e-06	1.42531e-05		52.5943
		0.00143009	0.00139279	0.000156436	0.00030648	1	1.16337e-06	0.000180832	0.000893642	4.35554e-05	3.75981e-05	5.6698e-06	4.93834e-06	7.45192e-06	1.30578e-05		52.5921
		0.00170245	0.00145747	0.000111362	0.000366735	1	1.05582e-06	7.91079e-05	0.000677641	4.38969e-05	4.28707e-05	8.58919e-06	4.97706e-06	7.76502e-06	1.17767e-05		52.5898
		0.00150456	0.00140324	0.000112926	0.000356554	1	7.12654e-07	0.000230137	0.00067589	3.29265e-05	3.85404e-05	7.22118e-06	8.37588e-06	6.94053e-06	1.11927e-05		52.5876
		0.0015247	0.00145002	0.000154818	0.000305606	1	1.54905e-06	4.78974e-05	0.000689437	4.4661e-05	3.60212e-05	5.81372e-06	5.0637e-06	7.1229e-06	9.6946e-06		52.5853
		0.0014764	0.00144694	0.00015025	0.000371299	1	1.05913e-06	0.000217871	0.000886898	3.91816e-05	3.44069e-05	1.0058e-05	9.1534e-06	4.85183e-06	9.73205e-06		52.583
		0.00157345	0.00154898	9.30278e-05	0.000363301	1	1.4821e-06	0.000206039	0.000662153	3.94774e-05	3.84905e-05	4.50863e-06	4.37241e-06	6.44111e-06	6.7646e-06		52.5808
		0.00144707	0.00148657	8.79174e-05	0.00032617	1	1.96656e-06	4.33021e-05	0.000616249	3.08593e-05	3.66977e-05	6.00099e-06	2.61332e-06	5.61416e-06	7.82796e-06		52.5785
		0.00149814	0.00149026	0.000116236	0.000366388	1	1.72576e-06	4.50288e-05	0.000626474	4.96097e-05	3.6401e-05	6.01591e-06	1.13532e-05	6.96849e-06	5.1174e-06		52.5763
		0.00156035	0.00149348	0.000117925	0.000344366	1	1.85542e-06	3.91829e-05	0.000611333	2.59391e-05	4.0722e-05	4.51908e-06	7.01219e-06	5.11077e-06	8.42443e-06		52.574
		0.00152314	0.00147873	9.28624e-05	0.000359591	1	9.75148e-07	0.00155545	0.000609299	4.2231e-05	3.9537e-05	-3.6852e-08	6.89052e-06	6.07961e-06	5.76512e-06		52.5717
		0.00153341	0.00141407	9.92223e-05	0.000322255	1	7.32314e-07	5.94657e-05	0.000660262	3.80173e-05	3.51103e-05	5.92897e-06	6.88547e-06	7.39622e-06	5.2228e-06		52.5695
		0.00140578	0.00149049	7.66734e-05	0.000350586	1	3.74889e-07	5.07432e-05	0.000653153	3.35128e-05	3.77935e-05	4.50659e-06	7.86697e-06	4.96252e-06	5.12208e-06		52.5672
		0.00149771	0.00141784	9.29133e-05	0.000360032	1	1.14255e-06	4.11257e-05	0.000813741	3.44157e-05	3.60203e-05	4.62802e-06	8.07894e-06	7.43835e-06	3.95069e-06		52.5649
		0.00138082	0.00146778	9.45897e-05	0.000319138	1	1.20479e-06	0.00012109	0.000518118	3.0194e-05	3.496e-05	4.39449e-06	9.3761e-06	7.58634e-06	2.68572e-06		52.5627
		0.00145922	0.00148387	9.47018e-05	0.00037654	1	1.89983e-06	0.000311354	0.000902968	3.96436e-05	3.66122e-05	6.1826e-06	5.38499e-06	6.33504e-06	9.00017e-06		52.5604
		0.00141052	0.00139285	0.000145062	0.000328966	1	1.0885e-06	0.000194128	0.000664557	3.69433e-05	2.98538e-05	5.89109e-06	1.02624e-05	7.08643e-06	2.16006e-06		52.5582
		0.00147901	0.00151576	0.000112946	0.000314984	1	1.74865e-06	0.000229368	0.000766927	3.90864e-05	3.81615e-05	6.09571e-06	5.3093e-06	8.28337e-06	2.41945e-06		52.5559
		0.00147639	0.00150777	0.000114766	0.000379214	1	1.13933e-06	9.83435e-05	0.000677768	4.04084e-05	3.85034e-05	6.16619e-06	5.3707e-06	6.45562e-06	1.70143e-06		52.5536
		0.00139817	0.0013616	0.000551457	0.000353514	1	1.13346e-06	0.000128334	0.000860466	3.93348e-05	3.90964e-05	9.22079e-06	7.12408e-06	6.9691e-06	2.24929e-06		52.5514
		0.00136242	0.00147868	0.000241381	0.000347881	1	8.64412e-07	5.33595e-05	0.000677481	4.78303e-05	3.692e-05	7.51637e-06	5.23088e-06	7.09044e-06	2.92869e-06		52.5491
		0.00141505	0.00147767	0.000411888	0.000328821	1	1.91136e-06	0.000331779	0.000494946	3.37413e-05	3.68345e-05	1.09143e-05	8.12661e-06	6.92786e-06	2.09258e-06		52.5469
		0.0014855	0.00147598	0.000103244	0.000333227	1	4.88166e-07	9.9908e-05	0.00123796	3.7027e-05	3.75354e-05	1.03603e-05	5.99981e-06	7.23405e-06	3.05791e-06		52.5446
		0.00144933	0.0014376	0.000162702	0.000340034	1	2.28331e-06	4.94689e-05	0.000747038	2.02493e-05	3.78856e-05	5.87019e-06	1.70424e-06	4.96866e-06	3.39529e-06		52.5423
		0.00148599	0.0014649	0.00642785	0.000317794	1	5.73728e-06	0.00032067	0.000735624	3.25416e-05	3.98099e-05	5.8469e-06	9.33663e-06	7.03328e-06	1.79016e-06		52.5401
		0.00142005	0.00134888	8.25397e-05	0.000330592	1	9.33188e-07	4.66264e-05	0.00286715	4.28173e-05	3.61875e-05	1.39302e-06	8.24263e-06	6.83012e-06	3.11239e-06		52.5378
		0.00140925	0.00144938	8.10772e-05	0.000271987	1	3.60981e-07	4.24617e-05	0.000997672	3.96318e-05	3.64849e-05	5.79802e-06	4.2083e-06	6.84529e-06	2.12594e-06		52.5356
		0.00143304	0.00160387	7.29303e-05	0.000386731	1	1.77741e-06	3.25563e-05	0.000635784	3.79053e-05	4.03162e-05	5.78423e-06	5.03801e-06	7.47344e-06	1.59603e-06		52.5333
		0.00143785	0.00142879	6.61345e-05	0.000319875	1	1.65206e-06	0.000126399	0.00111586	4.26154e-05	3.50322e-05	1.41289e-06	8.3602e-06	6.02932e-06	1.06653e-06		52.531
		0.0014881	0.00144825	0.00113313	0.000338693	1	1.10886e-06	0.000169261	0.000668315	6.04986e-05	3.55385e-05	6.00128e-06	7.84068e-06	5.07962e-06	2.01896e-06		52.5288
		0.00136065	0.00159922	0.000311051	0.000325106	1	9.51772e-07	2.63655e-05	0.000536115	3.71331e-05	3.7375e-05	8.70469e-06	1.68127e-06	5.80485e-06	1.77307e-06		52.5265
		0.00147396	0.00142575	0.000178606	0.000322365	1	1.30258e-06	2.85608e-05	0.000862928	4.608e-05	3.64675e-05	6.34825e-06	1.29021e-05	6.78767e-06	1.55966e-06		52.5243
		0.00144129	0.00141991	6.06724e-05	0.000344442	1	9.82331e-07	2.4641e-05	0.000544691	3.24225e-05	3.4624e-05	5.97702e-06	7.80898e-06	7.1898e-06	1.28768e-06		52.522
		0.00142464	0.00140189	4.92209e-05	0.000307714	1	6.06944e-07	3.74115e-05	0.000519489	2.86128e-05	3.79951e-05	2.92522e-06	6.83691e-06	4.85188e-06	1.26832e-06		52.5197
		0.00146149	0.00145173	7.74442e-05	0.000339662	1	1.43527e-06	0.000177037	0.000852023	3.57608e-05	3.56752e-05	1.31716e-05	5.08117e-06	7.79744e-06	1.08038e-06		52.5175
		0.00137439	0.00144803	0.000211617	0.00028747	1	2.13647e-06	0.000251592	0.0011316	4.86225e-05	3.4983e-05	5.797e-06	9.25694e-06	7.23159e-06	1.59955e-06		52.5152
		0.00146115	0.00154561	6.03393e-05	0.000308903	1	5.95718e-07	0.000130418	0.00151237	3.29749e-05	3.66401e-05	1.41762e-06	3.35519e-06	6.0495e-06	1.41963e-06		52.513
		0.00143306	0.00151189	0.000695506	0.000306168	1	2.38445e-06	0.000235963	0.000530785	3.48816e-05	3.75902e-05	5.82442e-06	5.91849e-06	7.78494e-06	1.60712e-06		52.5107
		0.00147242	0.00156551	5.89275e-05	0.000346445	1	4.70308e-07	5.28389e-05	0.000871911	2.92521e-05	3.86392e-05	2.82649e-06	7.43196e-06	6.20894e-06	8.81433e-07		52.5084
		0.00145928	0.00146883	0.000175472	0.000712543	1	8.26438e-07	2.76851e-05	0.000631123	4.41087e-05	3.47426e-05	1.0075e-05	5.83456e-06	5.8834e-06	1.23701e-06		52.5062
		0.00151847	0.00150842	8.93589e-05	0.000266518	1	5.57437e-07	0.000274066	0.000719348	2.78046e-05	3.18447e-05	5.40696e-06	7.84915e-06	5.29936e-06	1.3284e-06		52.5039
		0.00155378	0.00154958	0.00020167	0.00025987	1	1.66302e-06	0.000120339	0.000628833	3.30829e-05	3.53581e-05	5.7972e-06	7.57405e-06	4.51944e-06	4.05452e-06		52.5016
		0.00156222	0.00166044	8.51161e-05	0.000279841	1	4.901e-07	4.1498e-05	0.000617302	3.13194e-05	3.28103e-05	4.43656e-06	2.58146e-06	5.67778e-06	1.63566e-06		52.4994
		0.00168725	0.00163279	7.92547e-05	0.000301636	1	1.06628e-06	3.71384e-05	0.000701038	2.9676e-05	3.6221e-05	2.86745e-06	1.67541e-06	6.42749e-06	3.51242e-06		52.4971
		0.00168597	0.00164989	0.000255756	0.000273825	1	1.07174e-06	9.95574e-05	0.000872302	3.39195e-05	3.34139e-05	5.80041e-06	8.4203e-06	6.8481e-06	1.60049e-06		52.4949
		0.00167145	0.00163396	0.00012163	0.000265447	1	1.30987e-06	0.00160124	0.000629783	4.13245e-05	3.16679e-05	1.42441e-06	3.37127e-06	5.30235e-06	1.60203e-06		52.4926
		0.00167037	0.00179365	0.000161827	0.000270489	1	3.80735e-07	5.46029e-05	0.00191025	2.62708e-05	3.41436e-05	4.57686e-06	6.21406e-06	5.03989e-06	1.68738e-06		52.4903
		0.00166503	0.00154382	0.000197839	0.000271905	1	1.3245e-06	4.82094e-05	0.000628329	2.77051e-05	3.08861e-05	5.87078e-06	6.81789e-06	6.01553e-06	2.50775e-06		52.4881
		0.00156797	0.00160747	0.000117441	0.000249274	1	8.16652e-07	4.87308e-05	0.000549857	2.99774e-05	2.93014e-05	5.67384e-06	6.58917e-06	5.56092e-06	1.05076e-06		52.4858
		0.00162352	0.0016483	7.98779e-05	0.000278922	1	9.53018e-07	4.98029e-05	0.000670891	3.55455e-05	2.91986e-05	5.79867e-06	6.73414e-06	8.91348e-06	1.42463e-06		52.4836
		0.00167948	0.00165623	0.000291971	0.000255259	1	1.63351e-06	0.000103121	0.000790504	3.41026e-05	3.33537e-05	4.26181e-06	2.47978e-06	3.93182e-06	1.22678e-06		52.4813
		0.00164277	0.00163174	0.000118352	0.000213341	1	1.40391e-06	6.56119e-05	0.000429327	3.25643e-05	2.9745e-05	4.27078e-06	3.31341e-06	5.84702e-06	2.43751e-06		52.4791
		0.00156944	0.00149511	0.000285957	0.000249061	1	2.23016e-06	4.75207e-05	0.000567288	3.41619e-05	2.94496e-05	4.0771e-06	6.32639e-06	5.0964e-06	1.00885e-06		52.4768
		0.00160368	0.00170493	0.000103406	0.000271126	1	4.80901e-07	5.01132e-05	0.00203581	4.46829e-05	3.20069e-05	5.81656e-06	1.68867e-06	5.18244e-06	1.42903e-06		52.4745
		0.00177376	0.00170327	9.64476e-05	0.000209734	1	7.33777e-07	5.34233e-05	0.000790372	2.71974e-05	3.25949e-05	1.45749e-06	5.17439e-06	6.61676e-06	8.6482e-06		52.4723
		0.00167618	0.00181844	0.00010673	0.000198198	1	1.61862e-06	7.13225e-05	0.00127368	2.69539e-05	3.25469e-05	6.07482e-06	1.76365e-06	5.41254e-06	1.30875e-06		52.47
		0.00170528	0.00166451	0.000164005	0.000198273	1	6.50246e-07	0.000149354	0.000656806	2.44259e-05	3.08446e-05	3.13392e-06	9.15552e-07	3.79297e-06	2.50339e-06		52.4678
		0.00181667	0.00163866	0.000191755	0.000215027	1	1.18532e-06	4.9053e-05	0.00077003	4.02296e-05	3.17859e-05	3.18757e-06	4.65621e-06	8.57449e-06	1.96414e-06		52.4655
		0.00171817	0.00178893	0.00012192	0.000237616	1	1.02819e-06	0.000195623	0.00064244	3.92319e-05	3.37194e-05	-3.88564e-08	9.08128e-07	6.13153e-06	3.61846e-06		52.4632
		0.0018032	0.00181027	0.000107665	0.000250954	1	1.39245e-06	0.000472615	0.000669485	3.17386e-05	3.22717e-05	3.06674e-06	7.16767e-06	6.04914e-06	4.87674e-06		52.461
		0.0017791	0.00172002	0.000278532	0.000212495	1	1.84956e-06	0.000205537	0.000644195	3.51979e-05	3.41882e-05	7.53309e-06	4.3687e-06	4.69237e-06	2.38901e-06		52.4587
		0.00164915	0.00172165	8.50063e-05	0.000209366	1	1.06002e-06	0.000205105	0.000680338	3.11204e-05	3.10143e-05	7.18011e-06	2.49835e-06	4.34468e-06	2.4506e-06		52.4565
		0.00160138	0.00197652	0.000178218	0.000238221	1	1.29256e-05	9.19022e-05	0.000870602	2.52672e-05	3.121e-05	1.06708e-05	6.17959e-06	4.33454e-06	8.30081e-06		52.4542
		0.00183238	0.00189483	8.51019e-05	0.000213376	1	1.72903e-05	6.58251e-05	0.000558944	3.51958e-05	3.19336e-05	4.98568e-06	5.80213e-06	5.93529e-06	3.6515e-06		52.4519
		0.00171097	0.0017389	0.000797785	0.000201396	1	1.07808e-05	6.05378e-05	0.00464883	3.2047e-05	3.28834e-05	1.32286e-05	2.87145e-06	6.1687e-06	5.21e-06		52.4497
		0.00179775	0.00178917	0.00032769	0.00024502	1	2.92171e-06	5.19796e-05	0.000807945	2.31652e-05	3.29592e-05	3.08454e-06	4.50571e-06	4.42464e-06	1.90066e-06		52.4474
		0.00160629	0.00171848	7.86811e-05	0.000222654	1	3.26345e-06	0.000300128	0.000880003	4.45546e-05	3.2798e-05	1.44954e-06	1.71533e-06	3.81639e-06	1.98771e-06		52.4451
		0.00169313	0.00166216	9.77433e-05	0.000252013	1	2.63619e-06	7.34794e-05	0.000660507	2.51534e-05	2.99549e-05	2.90934e-06	3.39985e-06	5.3473e-06	9.0727e-07		52.4429
		0.00165637	0.00158865	6.81627e-05	0.000182616	1	8.13041e-07	0.000270429	0.00139676	3.62205e-05	3.28134e-05	5.64875e-06	1.63995e-06	4.78123e-06	2.0712e-06		52.4406
		0.00164562	0.00165252	0.000165624	0.000218663	1	1.08933e-06	3.61963e-05	0.000699146	2.61587e-05	3.41523e-05	2.92941e-06	1.71161e-06	6.96049e-06	2.34002e-06		52.4384
		0.00171101	0.00161859	0.00078647	0.000289215	1	1.79134e-06	4.15306e-05	0.000713451	2.94688e-05	3.14436e-05	-3.87849e-08	3.62592e-06	6.25937e-06	1.34531e-06		52.4361
		0.00172598	0.00164719	0.000694418	0.000241124	1	1.41015e-06	4.12337e-05	0.000885773	3.65513e-05	3.47975e-05	1.53346e-06	5.44409e-06	5.56903e-06	1.72468e-06		52.4338
		0.00174576	0.00172756	6.71549e-05	0.000206751	1	1.00484e-06	3.77015e-05	0.000574841	4.09288e-05	3.52202e-05	7.65192e-06	7.10031e-06	4.35778e-06	#VALUE!		52.4316
		0.00176121	0.00170322	0.000553008	0.000225212	1	1.29059e-07	4.62231e-05	0.000757884	4.54251e-05	3.30504e-05	1.47786e-06	6.12112e-06	5.36712e-06	1.29507e-05		52.4293
		0.00181104	0.00182519	8.84861e-05	0.000250601	1	1.37043e-06	3.6967e-05	0.000588673	2.78089e-05	3.2153e-05	1.49026e-06	5.29072e-06	3.65296e-06	1.85981e-06		52.4271
		0.00181275	0.00162341	8.43743e-05	0.000239182	1	1.27219e-06	6.19337e-05	0.000842791	4.41299e-05	3.63161e-05	6.20011e-06	4.50014e-06	4.00481e-06	2.27337e-06		52.4248
		0.00185787	0.00182146	8.68554e-05	0.000202537	1	1.70058e-06	0.000239462	0.000766103	3.7323e-05	3.22409e-05	6.38242e-06	4.63246e-06	4.26474e-06	2.53325e-06		52.4225
		0.00182933	0.00174768	8.41131e-05	0.000260209	1	8.76221e-07	5.2941e-05	0.000686736	4.59067e-05	3.22235e-05	9.15054e-06	6.18602e-06	6.78036e-06	4.25769e-06		52.4203
		0.00161016	0.00158237	8.20595e-05	0.000257306	1	1.12798e-06	5.5391e-05	0.000644552	3.31156e-05	3.7234e-05	1.49772e-06	3.54478e-06	4.35123e-06	1.86912e-06		52.418
		0.00170095	0.00187479	7.61759e-05	0.000238683	1	8.63882e-07	5.47814e-05	0.000729111	2.74774e-05	3.29305e-05	2.98227e-06	2.61375e-06	5.48136e-06	1.65611e-06		52.4158
		0.00194311	0.00177451	7.36179e-05	0.0002537	1	1.34847e-06	0.000519607	0.000596513	3.41091e-05	3.16377e-05	2.96987e-06	3.47059e-06	5.19225e-06	3.45708e-06		52.4135
		0.0017012	0.00180126	9.66073e-05	0.000280791	1	1.07197e-06	0.000298035	0.000629313	3.96565e-05	3.32339e-05	4.34211e-06	1.01066e-05	5.42765e-06	1.95179e-06		52.4112
		0.00170842	0.00164503	9.7568e-05	0.000243222	1	9.4176e-07	0.000109188	0.000588437	3.27003e-05	3.41177e-05	2.84722e-06	5.82271e-06	4.85014e-06	1.92775e-06		52.409
		0.00172423	0.00178844	0.000136343	0.000208068	1	7.04208e-07	0.000241695	0.000601964	3.65582e-05	3.22923e-05	1.14384e-05	5.7935e-06	4.44477e-06	2.43541e-06		52.4067
		0.00162813	0.00166238	0.000122759	0.000252214	1	6.04127e-07	6.2008e-05	0.00085583	3.17869e-05	3.53622e-05	1.02821e-05	1.70123e-06	7.44055e-06	2.85758e-06		52.4045
		0.00179383	0.00178089	0.000120822	0.000256906	1	2.74429e-06	0.00023781	0.00070521	#VALUE!	3.47196e-05	7.62854e-06	2.65438e-06	6.10978e-06	1.31316e-06		52.4022
		0.00164186	0.00173969	9.59857e-05	0.00024267	1	1.32706e-06	8.06389e-05	0.000918607	2.44395e-05	3.61606e-05	7.36178e-06	6.83109e-06	4.58566e-06	1.97888e-06		52.3999
		0.00174402	0.00170428	0.000358628	0.000215382	1	1.78012e-06	5.07902e-05	0.000664143	3.71633e-05	3.47467e-05	3.08335e-06	1.17108e-05	4.28469e-06	2.08763e-06		52.3977
		0.00167399	0.00163427	7.71226e-05	0.000244865	1	1.01198e-06	6.25026e-05	0.000694601	3.42698e-05	3.84486e-05	7.70631e-06	5.36306e-06	5.48615e-06	2.6302e-06		52.3954
		0.00180963	0.00183935	7.64954e-05	0.000271054	1	1.12471e-06	4.58894e-05	0.000739452	3.81725e-05	3.31032e-05	-3.78071e-08	2.65082e-06	4.06741e-06	2.9684e-06		52.3932
		0.00169779	0.00164831	0.000434525	0.000248548	1	1.26352e-06	7.6116e-05	0.00371637	3.25349e-05	4.06361e-05	6.15789e-06	4.46949e-06	4.25189e-06	1.88538e-06		52.3909
		0.00173552	0.00160665	0.000228962	0.000233415	1	3.42118e-06	5.06965e-05	0.000940442	3.44731e-05	3.31852e-05	1.5196e-06	3.59656e-06	4.82875e-06	3.95728e-06		52.3886
		0.00173761	0.00164499	7.88657e-05	0.000190832	1	1.08073e-06	5.65363e-05	0.000752802	2.34768e-05	4.02962e-05	4.3776e-06	5.94352e-06	5.99327e-06	2.85231e-06		52.3864
		0.00162682	0.00166868	7.9313e-05	0.000229043	1	1.7032e-06	9.50132e-05	0.00054107	3.89083e-05	3.28626e-05	4.44363e-06	5.17131e-06	4.62864e-06	1.27912e-06		52.3841
		0.00175691	0.00183588	9.41896e-05	0.000250456	1	2.55918e-06	6.31182e-05	0.00102143	3.65559e-05	4.07481e-05	1.53365e-06	9.07478e-06	5.98755e-06	2.29212e-06		52.3819
		0.00169582	0.00179295	8.55675e-05	0.00023137	1	6.37438e-06	0.000278832	0.000709868	4.27328e-05	3.37322e-05	4.32207e-06	5.02985e-06	6.04592e-06	1.94278e-06		52.3796
		0.00169203	0.00170711	7.29847e-05	0.000247904	1	1.58962e-06	0.00026039	0.000621274	4.16216e-05	3.43677e-05	2.96438e-06	7.79455e-06	4.78391e-06	1.46574e-06		52.3773
		0.00164732	0.00188496	8.4585e-05	0.000295478	1	3.70061e-06	4.28687e-05	0.000906965	3.27147e-05	3.88255e-05	6.0309e-06	7.00384e-06	6.58272e-06	2.75857e-06		52.3751
		0.00169507	0.00170168	8.76253e-05	0.00025621	1	2.8638e-06	0.000160368	0.000952884	3.49253e-05	3.66969e-05	4.36462e-06	7.61913e-06	4.15659e-06	2.31467e-06		52.3728
		0.00156052	0.00158633	7.34298e-05	0.000228276	1	1.04499e-06	0.000284971	0.00080148	3.06792e-05	3.54977e-05	2.81019e-06	3.28398e-06	4.66107e-06	6.69303e-06		52.3706
		0.0016977	0.00166022	0.000117083	0.000260049	1	9.7281e-07	8.68942e-05	0.000958604	4.04594e-05	3.75331e-05	1.0386e-05	8.5926e-06	5.66941e-06	2.34935e-06		52.3683
		0.00180698	0.00180111	8.8795e-05	0.000236287	1	7.50744e-07	0.000331857	0.000676879	4.32621e-05	3.51121e-05	6.07819e-06	4.41164e-06	4.19685e-06	9.41824e-07		52.366
		0.0017004	0.0016476	8.70808e-05	0.00023976	1	9.55144e-07	5.38264e-05	0.000663989	4.30046e-05	3.31037e-05	5.8116e-06	3.37454e-06	6.21387e-06	1.77935e-06		52.3638
		0.00177333	0.00168012	9.29384e-05	0.000281347	1	1.69893e-06	5.05466e-05	0.000582503	2.62776e-05	3.679e-05	7.41215e-06	3.43887e-06	5.40868e-06	5.5944e-07		52.3615
		0.00165094	0.00168119	9.52147e-05	0.000201239	1	3.78315e-06	4.42216e-05	0.000899744	3.91081e-05	3.75346e-05	5.60569e-06	3.25497e-06	4.86967e-06	1.54677e-06		52.3593
		0.00171962	0.00169221	0.000104792	0.000260723	1	1.08913e-06	4.2851e-05	0.000750132	3.53013e-05	3.81376e-05	2.92887e-06	4.27833e-06	5.64586e-06	2.51789e-06		52.357
		0.0017996	0.00162187	0.000116484	0.000242575	1	5.0596e-06	4.78807e-05	0.000765688	4.58362e-05	3.8629e-05	4.30741e-06	2.50631e-06	3.97389e-06	1.76211e-06		52.3547
		0.00171866	0.00173131	0.000354693	0.000260901	1	1.17859e-06	5.41278e-05	0.00057325	3.35892e-05	3.37367e-05	5.74393e-06	5.8367e-06	4.22198e-06	1.41119e-06		52.3525
		0.00164974	0.00175578	9.24847e-05	0.000263844	1	2.21584e-06	5.52173e-05	0.000609699	3.33131e-05	3.60311e-05	4.26358e-06	5.78872e-06	4.82183e-06	1.57188e-06		52.3502
		0.00172467	0.00171045	9.35243e-05	0.000275793	1	1.07268e-06	5.2988e-05	0.000780759	3.96828e-05	3.4379e-05	1.42429e-06	6.74206e-06	5.68995e-06	1.07514e-06		52.3479
		0.00174505	0.0017096	0.000500441	0.000245517	1	1.46414e-06	0.000154138	0.000671333	3.64803e-05	4.23437e-05	4.45402e-06	1.72774e-06	6.0979e-06	2.00209e-06		52.3457
		0.00165697	0.00179646	0.000112381	0.000272102	1	1.03879e-06	5.46454e-05	0.00083736	3.04972e-05	3.54685e-05	8.45067e-06	9.79382e-06	4.50817e-06	2.23147e-06		52.3434
		0.00178991	0.00178653	0.000116497	0.000283844	1	2.45398e-07	6.49041e-05	0.000865019	3.59504e-05	3.95528e-05	5.86472e-06	8.51366e-06	6.532e-06	2.32777e-06		52.3412
		0.0018	0.00154142	0.000107418	0.000278407	1	1.00128e-06	0.000248638	0.000760122	2.93959e-05	3.50615e-05	1.08719e-05	5.50659e-06	8.08845e-06	3.95397e-06		52.3389
		0.00168207	0.00177801	0.000116114	0.000227507	1	3.02047e-06	7.41706e-05	0.00328707	2.92006e-05	3.17045e-05	2.82151e-06	1.64857e-06	5.18588e-06	2.42559e-06		52.3366
		0.0016294	0.00168661	0.000514274	0.000260859	1	5.73297e-07	6.37888e-05	0.000619262	3.33029e-05	3.49921e-05	4.16186e-06	4.84341e-06	6.06962e-06	4.73027e-06		52.3344
		0.00172821	0.00175879	0.000107675	0.000273603	1	1.18175e-06	5.55144e-05	0.000724611	2.96168e-05	3.54059e-05	2.86173e-06	1.67206e-06	6.41467e-06	2.46016e-06		52.3321
		0.00181694	0.00171476	0.000117001	0.000267909	1	9.88818e-07	7.04756e-05	0.000583064	3.94274e-05	3.9509e-05	6.01649e-06	3.49351e-06	4.55635e-06	2.02407e-06		52.3299
		0.00185533	0.00166261	0.000192468	0.000271037	1	3.48659e-07	0.000448448	0.00072076	4.30199e-05	4.14721e-05	1.54616e-05	7.31653e-06	5.73817e-06	3.59637e-07		52.3276
		0.00169129	0.00155827	0.00013315	0.000268955	1	7.03692e-07	0.000292983	0.00371925	4.77858e-05	3.64019e-05	7.13036e-06	4.96224e-06	5.32999e-06	1.91667e-06		52.3254
		0.00181788	0.00166515	0.00020475	0.000265604	1	1.34569e-06	0.000283113	0.000664242	4.3296e-05	4.15741e-05	7.46511e-06	2.59752e-06	6.90919e-06	3.26954e-06		52.3231
		0.00167078	0.00169786	0.000418468	0.00026773	1	2.62091e-07	0.000132901	0.000914806	3.221e-05	3.8203e-05	9.41501e-06	7.27414e-06	5.72034e-06	1.15999e-06		52.3208
		0.00177012	0.00182743	0.000152887	0.000272776	1	5.09874e-07	5.71181e-05	0.000704594	3.60633e-05	3.83095e-05	1.51298e-06	4.47611e-06	3.98343e-06	1.70165e-06		52.3186
		0.00165912	0.00179854	0.000111298	0.000310628	1	7.17686e-07	4.89662e-05	0.000630279	3.56183e-05	3.55331e-05	7.27216e-06	4.21738e-06	4.52984e-06	1.95479e-06		52.3163
		0.00167689	0.00179336	0.000102308	0.000290142	1	2.63425e-06	6.52241e-05	0.000736125	3.75166e-05	4.00257e-05	8.79457e-06	4.24667e-06	4.95232e-06	9.06604e-07		52.314
		0.00178376	0.00162199	0.000139231	0.000283519	1	1.65001e-06	5.46673e-05	0.00056573	3.44471e-05	4.17608e-05	2.85799e-06	5.00982e-06	4.8685e-06	2.10901e-06		52.3118
		0.00169761	0.00176717	0.00022064	0.000337815	1	1.53808e-06	0.000100638	0.000526056	3.94576e-05	3.96759e-05	8.6768e-06	4.1898e-06	5.14321e-06	1.5928e-06		52.3095
		0.0016085	0.00169633	8.01525e-05	0.000260355	1	7.07972e-07	9.12623e-05	0.000886856	4.24148e-05	3.77325e-05	7.17373e-06	6.6566e-06	6.00094e-06	1.92833e-06		52.3073
		0.0017444	0.00185278	8.66981e-05	0.000301455	1	5.15841e-06	8.47145e-05	0.000789123	4.92153e-05	4.08978e-05	4.39154e-06	3.4071e-06	6.27383e-06	1.44159e-06		52.305
		0.0016622	0.00171546	7.77652e-05	0.000327485	1	1.80628e-06	4.64494e-05	0.000550092	4.70089e-05	3.69954e-05	8.28502e-06	4.80081e-06	6.26184e-06	5.35563e-06		52.3027
		0.00169892	0.00172904	9.4618e-05	0.000300552	1	2.21524e-06	4.54545e-05	0.000712079	4.08046e-05	4.19936e-05	4.04983e-06	3.92747e-06	4.82119e-06	1.16576e-06		52.3005
		0.00156216	0.00170468	9.97856e-05	0.000266253	1	4.22252e-06	0.000109428	0.000997958	5.01824e-05	4.10342e-05	8.16854e-06	1.57772e-06	5.93164e-06	2.81447e-06		52.2982
		0.00162869	0.00156793	5.58852e-05	0.000243891	1	1.16556e-06	0.000214647	0.000620129	3.53138e-05	3.70927e-05	3.86661e-06	2.24983e-06	5.52391e-06	1.58178e-06		52.296
		0.00167978	0.0016647	6.16527e-05	0.0003532	1	1.66788e-06	4.3695e-05	0.00129502	4.47599e-05	4.05464e-05	9.52396e-06	1.02433e-05	5.31977e-06	3.3036e-06		52.2937
		0.00161932	0.00157365	0.000425874	0.000339105	1	3.28791e-06	0.000108331	0.000457339	4.87237e-05	3.72611e-05	9.40206e-06	2.33345e-06	8.83367e-06	3.09923e-06		52.2914
		0.00172812	0.00166412	6.49971e-05	0.000305509	1	1.69018e-06	0.000203225	0.000564837	3.99254e-05	3.89586e-05	8.26767e-06	5.58918e-06	5.39088e-06	4.01328e-06		52.2892
		0.00189138	0.00173422	8.16846e-05	0.000311346	1	7.97684e-06	9.9915e-05	0.000765955	3.02448e-05	3.76926e-05	4.17291e-06	8.0939e-06	6.45842e-06	4.74282e-06		52.2869
		0.00173137	0.00181493	0.000156176	0.000321723	1	7.87274e-07	0.000120494	0.00109935	4.97368e-05	3.76829e-05	6.84562e-06	7.14621e-06	6.70145e-06	3.82549e-06		52.2847
		0.00177075	0.00175964	0.000102253	0.00033623	1	1.35164e-06	0.000191187	0.000595928	4.45295e-05	3.89127e-05	1.34784e-06	6.38016e-06	7.34311e-06	5.67052e-06		52.2824
		0.00173668	0.00181796	0.000233523	0.00037705	1	1.21804e-06	0.00010419	0.0027888	4.45218e-05	4.07664e-05	9.4733e-06	6.26991e-06	1.04649e-05	6.38922e-06		52.2801
		0.00178	0.00176212	0.000183525	0.000318506	1	2.17285e-06	0.000227746	0.00101304	4.22704e-05	4.12756e-05	9.31297e-06	5.39327e-06	6.26623e-06	4.51484e-06		52.2779
		0.00176097	0.00177324	0.00247618	0.000348338	1	2.98404e-06	0.000113753	0.00207859	3.8453e-05	4.42814e-05	8.12063e-06	7.84271e-06	5.89686e-06	8.35501e-06		52.2756
		0.00179864	0.00180234	0.000202396	0.000330887	1	1.58427e-06	0.000155899	0.000700821	3.16041e-05	3.51867e-05	9.04649e-06	8.98132e-06	6.2018e-06	5.00952e-06		52.2734
		0.0017408	0.00172712	0.000168742	0.000376968	1	1.26332e-06	8.30047e-05	0.000542151	4.45184e-05	3.82757e-05	1.25977e-06	7.45421e-06	6.86333e-06	6.23213e-06		52.2711
		0.00182076	0.00190363	0.000171619	0.000375612	1	2.71624e-06	8.88521e-05	0.000668121	4.97866e-05	3.92409e-05	6.64618e-06	9.25081e-06	8.39959e-06	7.08777e-06		52.2688
		0.00174519	0.00179543	0.000150329	0.000352198	1	2.59056e-06	0.000277353	0.000710412	4.7483e-05	3.79973e-05	8.8868e-06	8.82278e-06	7.55949e-06	4.61466e-06		52.2666
		0.00169574	0.00184366	0.000161867	0.00042134	1	4.82892e-06	0.000244851	0.000698004	4.45188e-05	3.87732e-05	6.42664e-06	5.96336e-06	7.77882e-06	6.38755e-06		52.2643
		0.0017696	0.00163572	0.000196524	0.000374034	1	7.64346e-07	0.000209646	0.00069883	3.62989e-05	3.94984e-05	1.19899e-05	7.70903e-06	7.80796e-06	1.01409e-05		52.2621
		0.00169149	0.00168221	0.000205819	0.000371219	1	1.43312e-06	0.000119652	0.00167622	3.34433e-05	3.76417e-05	1.00227e-05	6.52699e-06	6.12077e-06	7.42366e-06		52.2598
		0.00175893	0.00179358	0.000469309	0.000372118	1	2.82218e-06	9.96657e-05	0.00424119	4.30041e-05	4.04903e-05	1.06444e-05	3.08077e-06	7.09157e-06	7.56307e-06		52.2575
		0.00177586	0.00183092	0.000245202	0.000335891	1	1.85643e-06	0.000172684	0.000747998	3.49459e-05	3.8631e-05	9.35697e-06	1.00637e-05	7.95944e-06	1.05061e-05		52.2553
		0.00272899	0.00178271	0.00028319	0.000378891	1	1.03794e-06	0.000119374	0.000848477	3.95729e-05	3.79508e-05	8.87592e-06	5.14017e-06	6.76117e-06	7.82293e-06		52.253
		0.00190656	0.00197494	0.000373064	0.000393501	1	1.92089e-06	0.000226064	0.000798892	3.19497e-05	3.51511e-05	6.52314e-06	6.80956e-06	6.50189e-06	7.58733e-06		52.2507
		0.00181718	0.00192007	0.00183456	0.000431962	1	2.27122e-06	0.000164863	0.00115981	3.0923e-05	3.40215e-05	2.50656e-06	9.52011e-06	5.28135e-06	1.00912e-05		52.2485
		0.00182085	0.00205735	0.000402214	0.000422566	1	4.53755e-06	0.000146889	0.00074121	2.71735e-05	3.22294e-05	7.94283e-06	7.67099e-06	7.06292e-06	1.24897e-05		52.2462
		0.00188486	0.00179921	0.00040293	0.000456339	1	1.80685e-06	0.00012884	0.000751463	2.79778e-05	2.99809e-05	1.23026e-05	3.5584e-06	6.22512e-06	1.09943e-05		52.244
		0.00186123	0.0018427	0.000307217	0.000450919	1	5.00238e-06	0.00013234	0.000936649	3.41523e-05	3.22832e-05	8.4194e-06	1.18418e-05	6.52033e-06	9.59855e-06		52.2417
		0.00188294	0.00187296	0.000310761	0.000464209	1	2.41047e-06	0.00027176	0.000880107	2.66267e-05	4.70502e-05	2.43898e-06	7.83825e-06	5.68582e-06	8.9279e-06		52.2394
		0.00182914	0.00188191	0.000277525	0.000535431	1	3.54537e-06	0.000148515	0.000958491	2.62211e-05	3.09354e-05	1.25097e-06	5.92164e-06	5.45198e-06	1.14347e-05		52.2372
		0.00167512	0.00180267	0.00034596	0.000472082	1	1.53877e-06	0.000222247	0.000839945	2.36316e-05	2.82819e-05	2.48819e-06	5.81546e-06	6.35842e-06	1.01688e-05		52.2349
		0.00202184	0.00189348	0.000256685	0.00054056	1	2.68488e-06	0.000130187	0.0012481	2.31079e-05	3.13554e-05	3.77772e-06	5.12906e-06	9.10878e-06	8.26422e-06		52.2327
		0.00175986	0.0017707	0.000267428	0.000556289	1	2.97517e-06	0.000192769	0.00104402	2.37803e-05	2.66581e-05	6.50104e-06	1.35736e-05	5.32248e-06	7.87598e-06		52.2304
		0.00189179	0.00182366	0.0003173	0.000506782	1	3.90789e-06	0.000177094	0.000997875	2.58007e-05	2.42505e-05	9.31472e-06	8.47696e-06	4.13849e-06	1.0298e-05		52.2281
		0.00187282	0.00183464	0.000315163	0.000518943	1	2.35902e-06	0.000159289	0.000712224	2.39871e-05	2.90008e-05	3.92145e-06	3.80297e-06	4.55162e-06	1.2067e-05		52.2259
		0.00182391	0.00200425	0.000361645	0.000543192	1	2.79122e-06	0.000182184	0.000834659	2.40232e-05	2.28726e-05	2.60736e-06	4.57048e-06	4.67538e-06	7.00378e-06		52.2236
		0.00193733	0.00189321	0.000420353	0.000557894	1	2.87179e-06	0.000164269	0.000833755	1.72956e-05	2.0482e-05	2.49132e-06	3.63918e-06	3.12693e-06	7.14718e-06		52.2214
		0.0018116	0.00174451	0.000416583	0.000501984	1	5.4745e-06	0.000250747	0.00101562	2.31336e-05	2.23512e-05	-3.13852e-08	4.40124e-06	4.95257e-06	7.2031e-06		52.2191
		0.0019081	0.00185336	0.00035627	0.000542497	1	1.76313e-06	0.000363991	0.000918001	2.3113e-05	2.23249e-05	2.67333e-06	5.46711e-06	4.91353e-06	8.8089e-06		52.2169
		0.00194967	0.00182749	0.000436601	0.000520634	1	6.43778e-06	0.000224938	0.0009034	1.99963e-05	1.84323e-05	3.86443e-06	4.49726e-06	3.79527e-06	7.36025e-06		52.2146
		0.00196846	0.00184689	0.000352741	0.000543379	1	3.29968e-06	0.000189456	0.00112879	1.42818e-05	1.97513e-05	2.58592e-06	7.55456e-07	3.47751e-06	4.74187e-06		52.2123
		0.00177645	0.00194066	0.00267746	0.000571867	1	5.6132e-06	0.00121174	0.000726751	1.78725e-05	2.03309e-05	2.57443e-06	7.52099e-07	4.27003e-06	8.16945e-06		52.2101
		0.00184703	0.00197831	0.000529385	0.000587569	1	2.68661e-06	0.00152216	0.00087342	1.36731e-05	1.93421e-05	2.60985e-06	1.52489e-06	3.27569e-06	6.85153e-06		52.2078
		0.00185576	0.00183093	0.000373682	0.000521706	1	1.50652e-06	0.000333297	0.000721459	1.95974e-05	2.03539e-05	6.57271e-06	6.0989e-06	3.15821e-06	4.30843e-06		52.2056
		0.00204182	0.00184515	0.00033331	0.00058451	1	2.31366e-06	0.000339189	0.000840652	1.9328e-05	2.2163e-05	4.02877e-06	6.25138e-06	3.47701e-06	2.78784e-06		52.2033
		0.00180228	0.00184362	0.000267432	0.000553777	1	1.79515e-06	0.00133795	0.000723306	1.6333e-05	2.04006e-05	-3.20277e-08	1.49707e-06	4.47954e-06	4.38643e-06		52.201
		0.00187965	0.00185336	0.000279493	0.000520951	1	3.63151e-06	0.00378393	0.0016909	2.11923e-05	1.95959e-05	2.45118e-06	2.14828e-06	2.19744e-06	1.95801e-06		52.1988
		0.00174977	0.00170913	0.000289399	0.00055778	1	3.95148e-06	0.000271788	0.000782476	1.18958e-05	1.77922e-05	2.40071e-06	9.8196e-06	3.33608e-06	3.5253e-06		52.1965
		0.00211532	0.00186407	0.00024918	0.000492	1	2.73282e-06	8.3604e-05	0.000765207	1.6273e-05	1.79269e-05	7.7225e-06	1.49157e-06	2.74631e-06	2.97159e-06		52.1942
		0.00192832	0.00185625	0.000300936	0.000592338	1	1.50692e-06	7.82507e-05	0.00085074	2.25667e-05	2.23049e-05	2.61015e-06	6.10052e-06	2.22295e-06	1.92612e-06		52.192
		0.00195395	0.00189244	0.000271505	0.000577352	1	2.26665e-06	7.86989e-05	0.00096843	1.67036e-05	1.90804e-05	1.2938e-06	4.59325e-06	2.81897e-06	1.29563e-06		52.1897
		0.00198962	0.00186852	0.000169373	0.000526517	1	1.79657e-06	6.62946e-05	0.0046424	2.21699e-05	1.85057e-05	1.2661e-06	1.49825e-06	2.87359e-06	2.82882e-06		52.1875
		0.00188516	0.0018667	0.000853342	0.000541059	1	1.78364e-06	6.45738e-05	0.000866797	1.55056e-05	2.19199e-05	3.8346e-06	2.2312e-06	2.73876e-06	4.3583e-06		52.1852
		0.00200141	0.00201393	0.000503341	0.000490581	1	1.36497e-06	9.63697e-05	0.000703761	2.273e-05	1.78752e-05	5.12284e-06	0	3.99371e-06	4.83912e-07		52.1829
		0.00208188	0.00206358	0.00054795	0.00051575	1	1.20753e-06	9.12887e-05	0.000766235	1.39331e-05	2.16059e-05	1.31312e-06	1.55389e-06	3.57644e-06	1.1531e-06		52.1807
		0.00185968	0.00179967	0.000176334	0.000514793	1	1.32507e-06	5.69132e-05	0.000733511	1.50504e-05	2.01551e-05	2.47105e-06	2.88767e-06	3.76619e-06	1.22181e-06		52.1784
		0.00202321	0.00196091	0.00019166	0.000553384	1	1.37681e-06	0.000137615	0.000717335	2.21982e-05	2.06925e-05	-3.20941e-08	2.25025e-06	3.56789e-06	2.20725e-06		52.1762
		0.00200116	0.00201669	0.000192312	0.000583101	1	1.69911e-06	6.00353e-05	0.000869677	2.22737e-05	2.07629e-05	7.79346e-06	4.51596e-06	4.27308e-06	5.66531e-06		52.1739
		0.00206508	0.00200338	0.000723797	0.000534446	1	1.73697e-06	0.000154667	0.000559621	2.42654e-05	1.96893e-05	2.63366e-06	7.69404e-07	4.25019e-06	1.17258e-05		52.1716
		0.00200233	0.00192902	0.000506769	0.000590378	1	6.46805e-06	5.24766e-05	0.000617454	2.01615e-05	2.11665e-05	3.75941e-06	3.64582e-06	5.14692e-06	1.97802e-05		52.1694
		0.00208854	0.00211121	0.000111249	0.000546247	1	1.7096e-06	6.7438e-05	0.000663894	2.6827e-05	2.1731e-05	3.90444e-06	3.78647e-06	4.41566e-06	1.09095e-05		52.1671
		0.00210692	0.0019675	0.000149893	0.000543802	1	1.68211e-06	7.44543e-05	0.000570052	2.89221e-05	2.245e-05	5.4741e-06	3.97319e-06	3.41392e-06	7.63755e-06		52.1649
		0.00196746	0.00204426	0.000438214	0.000510093	1	2.4992e-06	0.000103766	0.000775534	1.5321e-05	2.12642e-05	1.06532e-05	7.7081e-07	5.5593e-06	7.56933e-06		52.1626
		0.00184595	0.0018134	0.000202502	0.000530941	1	2.07878e-06	6.6565e-05	0.000671416	2.41887e-05	1.99909e-05	3.61978e-06	4.91462e-06	6.35671e-06	4.99202e-06		52.1603
		0.00196539	0.00191048	0.000126051	0.000663	1	1.84895e-06	7.45969e-05	0.000464442	1.94289e-05	1.95247e-05	5.01687e-06	1.4565e-06	3.35228e-06	2.90173e-06		52.1581
		0.0019089	0.0020011	0.000135514	0.0006061	1	2.2221e-06	6.69713e-05	0.000568265	2.14804e-05	2.45335e-05	6.47044e-06	2.25142e-06	4.37597e-06	2.67752e-06		52.1558
		0.00190794	0.0018663	0.000111297	0.000527894	1	1.84754e-06	8.10345e-05	0.000703167	1.30498e-05	2.14471e-05	1.00573e-05	7.27692e-07	4.35482e-06	3.05116e-06		52.1536
		0.00216212	0.00199133	0.000146538	0.000549784	1	3.1677e-06	8.16377e-05	0.000806208	1.63514e-05	2.22526e-05	3.8637e-06	8.99306e-06	2.75954e-06	3.61056e-06		52.1513
		0.00194357	0.00174475	0.00028981	0.000568379	1	2.2398e-06	0.000504531	0.00060433	1.92659e-05	1.95211e-05	2.47188e-06	2.88864e-06	3.76746e-06	6.18831e-06		52.149
		0.00197329	0.00207142	0.000149676	0.000562704	1	8.38996e-06	0.000129383	0.000751426	1.64592e-05	1.85502e-05	2.58201e-06	3.77165e-06	4.05108e-06	4.57751e-06		52.1468
		0.00195896	0.00205141	0.000144564	0.000596973	1	3.16555e-06	8.00699e-05	0.000756256	2.21725e-05	2.34328e-05	2.65162e-06	3.87333e-06	3.80364e-06	3.57089e-06		52.1445
		0.00205571	0.00203674	0.000172739	0.000567651	1	4.01778e-06	0.000119648	0.000874812	2.51317e-05	2.49545e-05	1.26861e-06	2.25183e-06	4.14638e-06	1.7396e-06		52.1423
		0.00193146	0.00194181	0.00016707	0.000564664	1	2.93814e-06	8.08443e-05	0.000823354	2.05897e-05	1.98814e-05	2.54888e-06	1.48927e-06	4.22767e-06	4.42974e-05		52.14
		0.00205134	0.00210611	0.000141712	0.000592285	1	4.07088e-06	8.94473e-05	0.00146279	2.2356e-05	2.17203e-05	2.67356e-06	7.81062e-07	4.43447e-06	3.27493e-06		52.1377
		0.00202093	0.00196991	0.000206857	0.000617671	1	3.35103e-06	7.98623e-05	0.000696485	1.85291e-05	2.14033e-05	3.71624e-06	0	2.98605e-06	2.57157e-06		52.1355
		0.00216676	0.00196528	0.000216616	0.000568517	1	4.02392e-06	0.000247083	0.000973485	2.517e-05	1.94878e-05	2.57325e-06	2.25527e-06	3.57584e-06	4.40531e-06		52.1332
		0.00206256	0.00199108	0.000304235	0.000556632	1	1.13962e-05	0.00189171	0.000721095	2.15212e-05	2.21623e-05	5.36184e-06	3.89171e-06	3.94113e-06	6.34534e-06		52.1309
		0.00200591	0.00207198	0.00030386	0.00059733	1	9.54868e-06	0.00213314	0.000727606	1.33656e-05	1.96512e-05	6.42587e-06	2.98129e-06	6.40495e-06	2.96968e-06		52.1287
		0.00198775	0.00200956	0.000142115	0.00054266	1	2.17116e-06	0.00013067	0.000559943	2.50276e-05	2.37999e-05	3.96923e-06	2.30954e-06	3.07119e-06	2.2654e-06		52.1264
		0.00188526	0.00195568	0.000574488	0.000501164	1	3.48843e-06	0.00135263	0.00195132	2.14764e-05	2.0949e-05	3.86861e-06	3.75173e-06	3.10849e-06	2.52068e-06		52.1242
		0.00217101	0.00203123	0.000200728	0.000590876	1	4.07155e-06	0.000441828	0.000780466	2.10326e-05	2.03934e-05	3.92184e-06	1.52131e-06	3.61818e-06	2.39686e-06		52.1219
		0.00199684	0.00188837	0.00424946	0.000573762	1	2.59579e-06	0.000154007	0.000975969	2.18014e-05	2.2284e-05	2.52163e-06	2.94677e-06	4.74776e-06	2.4748e-06		52.1197
		0.00198157	0.00194646	0.000463089	0.000491005	1	1.67502e-06	0.000343132	0.00207757	2.05158e-05	2.04685e-05	2.53974e-06	4.45195e-06	3.87089e-06	2.33797e-06		52.1174
		0.00210691	0.00201127	0.000727226	0.000601181	1	3.23093e-06	0.000476824	0.000787623	2.33988e-05	1.883e-05	5.44674e-06	4.74406e-06	4.24622e-06	4.3037e-06		52.1151
		0.00205309	0.00203144	0.000297721	0.000599923	1	4.3893e-06	0.000411088	0.000767884	1.94864e-05	2.26217e-05	2.80691e-06	1.64003e-06	2.64218e-06	1.90046e-06		52.1129
		0.00201172	0.00191959	0.000366688	0.000538763	1	1.69191e-06	0.000109679	0.00313935	1.58863e-05	2.08077e-05	2.73583e-06	4.79567e-06	3.67911e-06	2.35193e-06		52.1106
		0.00215407	0.00204415	0.00022273	0.000557457	1	4.44012e-06	9.91624e-05	0.000892418	1.40696e-05	1.73642e-05	2.83941e-06	4.14764e-06	3.18193e-06	2.26813e-06		52.1084
		0.00207774	0.00207988	0.000211096	0.000596765	1	3.92273e-06	0.000138986	0.000721247	9.62903e-06	2.00065e-05	4.10197e-06	2.38677e-06	4.02856e-06	2.34116e-06		52.1061
		0.00223549	0.00211521	0.000222275	0.000533434	1	1.80854e-06	0.000103371	0.00106931	2.21512e-05	1.95233e-05	1.35395e-06	1.60222e-06	2.70418e-06	2.52433e-06		52.1038
		0.00215116	0.00219272	0.000207781	0.000602531	1	3.18698e-06	0.00034206	0.00174616	1.60543e-05	2.12069e-05	2.76476e-06	8.07704e-07	3.84197e-06	1.19875e-06		52.1016
		0.00204403	0.00214777	0.000651243	0.000472449	1	3.5519e-06	8.97499e-05	0.000657479	1.61804e-05	1.79894e-05	1.25328e-06	6.67416e-06	2.38932e-06	1.40956e-06		52.0993
		0.002022	0.00231333	0.00016207	0.000541713	1	2.28033e-06	0.000159969	0.000668596	2.31429e-05	2.04222e-05	4.16881e-06	3.2343e-06	2.10896e-06	1.53694e-06		52.0971
		0.00212286	0.00208132	0.000128383	0.000525674	1	3.63897e-06	0.00014881	0.000672332	2.30368e-05	2.03962e-05	4.29555e-06	0	3.19584e-06	2.79885e-06		52.0948
		0.00223115	0.00199747	0.0028943	0.000524187	1	2.91789e-06	0.000298821	0.00134456	2.85304e-05	2.11909e-05	1.00097e-05	3.31242e-06	3.30352e-06	7.11403e-07		52.0925
		0.00214071	0.00208956	0.000178774	0.000533368	1	2.61338e-06	9.05385e-05	0.000847751	1.26539e-05	1.64236e-05	2.88417e-06	1.68517e-06	3.10278e-06	2.47945e-06		52.0903
		0.0020154	0.00209247	0.00031995	0.000524615	1	2.7856e-06	0.000121585	0.000705479	1.55666e-05	1.64151e-05	2.81855e-06	1.64683e-06	3.53763e-06	2.25146e-06		52.088
		0.00194178	0.00208052	0.000187225	0.000518152	1	2.72493e-06	4.31764e-05	0.000641997	1.83584e-05	1.80222e-05	1.36135e-06	1.61097e-06	2.71895e-06	1.53111e-06		52.0857
		0.00209173	0.00201702	0.000213692	0.000459158	1	5.75146e-06	0.00222673	0.000631123	1.57569e-05	1.84639e-05	-3.56626e-08	1.66697e-06	2.81347e-06	1.41067e-06		52.0835
		0.00218426	0.0021118	0.000106457	0.000452605	1	2.00016e-06	6.44468e-05	0.00082252	1.65774e-05	1.84757e-05	2.85484e-06	1.66804e-06	2.17538e-06	1.75912e-06		52.0812
		0.00209933	0.00204136	0.00221598	0.000533205	1	1.61231e-06	6.2655e-05	0.000634024	2.89023e-05	1.88877e-05	1.37889e-06	8.15863e-07	2.62879e-06	1.55083e-06		52.079
		0.00203873	0.00194372	0.000129409	0.000513271	1	3.81239e-06	5.49303e-05	0.000739455	1.46175e-05	1.89292e-05	1.30681e-06	3.09293e-06	6.05136e-06	1.63087e-06		52.0767
		0.0019341	0.0021583	0.000511827	0.00052459	1	2.22187e-06	4.6321e-05	0.000745586	2.63777e-05	1.86754e-05	1.22538e-05	1.57565e-06	2.78024e-06	8.40966e-07		52.0744
		0.00208238	0.00199401	0.0001061	0.000481823	1	2.7907e-06	4.97977e-05	0.000788955	2.11293e-05	1.9301e-05	5.45595e-06	3.96002e-06	2.30881e-06	1.01041e-06		52.0722
		0.00201734	0.00215099	8.56425e-05	0.000441223	1	4.92906e-06	4.81807e-05	0.00062763	1.99935e-05	2.01615e-05	4.00995e-06	3.8888e-06	2.50597e-06	1.31633e-06		52.0699
		0.00203036	0.0019923	9.08875e-05	0.000475539	1	2.15359e-06	4.22066e-05	0.000654244	2.40829e-05	1.81015e-05	2.61385e-06	3.05454e-06	2.2261e-06	4.95224e-06		52.0677
		0.00194338	0.00205096	7.50557e-05	0.000465358	1	2.96809e-06	4.43675e-05	0.000599551	1.49517e-05	1.88326e-05	1.27134e-06	1.50446e-06	2.42376e-06	5.03515e-06		52.0654
		0.00182625	0.00189112	7.83115e-05	0.000488462	1	2.91244e-06	3.92919e-05	0.000595657	1.68231e-05	1.74972e-05	1.2475e-06	2.95257e-06	3.05791e-06	1.09548e-06		52.0631
		0.00201806	0.00219179	7.35103e-05	0.000493921	1	2.37389e-06	4.10264e-05	0.000777686	2.11631e-05	1.94164e-05	1.29356e-06	1.53075e-06	1.29171e-06	9.76453e-07		52.0609
		0.00187304	0.00185155	0.000226833	0.000401772	1	2.95099e-06	0.00035646	0.000687632	1.46616e-05	2.07927e-05	5.3427e-06	7.75547e-07	1.78487e-06	2.60539e-06		52.0586
		0.00201139	0.00193732	7.81296e-05	0.000454171	1	2.09218e-06	5.8657e-05	0.000614541	1.70368e-05	1.68637e-05	4.02565e-06	2.34237e-06	2.03654e-06	1.1588e-06		52.0564
		0.00200925	0.0018958	7.80028e-05	0.000488045	1	1.95113e-06	3.5922e-05	0.000673728	2.57305e-05	1.90694e-05	-3.28819e-08	5.37963e-06	2.94788e-06	1.30068e-06		52.0541
		0.0019336	0.0019219	0.000233936	0.000474411	1	1.96657e-06	2.91723e-05	0.000717619	2.06648e-05	1.71589e-05	-3.3142e-08	2.32373e-06	2.61462e-06	2.27932e-06		52.0518
		0.00184523	0.00194625	7.44571e-05	0.00041662	1	2.17335e-06	3.2165e-05	0.000959539	1.6815e-05	2.00624e-05	2.63784e-06	3.08257e-06	4.25693e-06	9.83151e-07		52.0496
		0.00209808	0.00185201	0.000387312	0.000512945	1	2.10973e-06	2.9653e-05	0.000690246	2.25356e-05	1.82273e-05	1.33068e-06	7.87338e-07	3.62427e-06	8.40444e-07		52.0473
		0.00179548	0.00197532	7.69317e-05	0.000444819	1	2.61163e-06	2.91501e-05	0.000539084	1.11308e-05	1.92133e-05	2.53701e-06	2.96475e-06	1.9332e-06	7.91161e-07		52.0451
		0.00177786	0.00190823	0.000147251	0.00041945	1	3.2698e-06	3.05807e-05	0.000581992	1.90146e-05	1.80805e-05	2.73894e-06	8.00161e-07	2.33263e-06	1.85444e-06		52.0428
		0.00199758	0.00208162	0.0001042	0.000395704	1	2.06959e-06	2.88243e-05	0.000687813	1.37986e-05	1.84472e-05	8.93593e-06	1.72593e-06	3.57512e-06	2.1798e-06		52.0405
		0.00181118	0.00186137	0.000110436	0.000508827	1	2.28745e-06	0.000106497	0.000493438	2.36043e-05	1.82483e-05	-3.65259e-08	1.70732e-06	3.01257e-06	1.62268e-06		52.0383
		0.00188831	0.00186131	9.15167e-05	0.000437379	1	2.83373e-06	4.76964e-05	0.000567561	1.50216e-05	1.67915e-05	1.4157e-06	6.7014e-06	2.44191e-06	8.94144e-07		52.036
		0.0019544	0.00191472	8.50195e-05	0.000448136	1	2.70817e-06	4.41531e-05	0.000657416	1.41672e-05	1.96146e-05	4.30651e-06	5.847e-06	2.17862e-06	1.41368e-06		52.0338
		0.00171216	0.00173007	7.1666e-05	0.000442599	1	1.70711e-06	4.14328e-05	0.000723044	1.838e-05	1.5987e-05	4.15786e-06	4.03224e-06	1.85594e-06	3.04521e-06		52.0315
		0.00181488	0.00180565	8.97933e-05	0.000398031	1	3.47997e-06	0.00205417	0.000682617	1.66105e-05	1.57948e-05	1.34656e-06	2.3902e-06	3.30072e-06	5.33304e-06		52.0292
		0.00185552	0.00189664	7.82138e-05	0.000421966	1	3.09507e-06	6.3092e-05	0.000715255	1.59678e-05	1.96476e-05	1.42753e-06	2.53393e-06	2.72152e-06	1.78152e-06		52.027
		0.00190855	0.00189489	0.000134148	0.000414658	1	4.22197e-06	0.00147273	0.000669831	1.68882e-05	1.58792e-05	1.36907e-06	8.10049e-07	4.35041e-06	2.21491e-06		52.0247
		0.0018194	0.00186574	0.000191938	0.000428549	1	3.18552e-06	6.07961e-05	0.000650593	2.96576e-05	1.78032e-05	2.86567e-06	2.51155e-06	2.3121e-06	8.93653e-07		52.0225
		0.0018112	0.00174554	9.61895e-05	0.00043075	1	3.57136e-06	0.000180417	0.000774334	1.92561e-05	1.67491e-05	2.89199e-06	1.68974e-06	3.11119e-06	3.19036e-06		52.0202
		0.00193171	0.00184529	8.46067e-05	0.00045364	1	2.68409e-06	5.39311e-05	0.000767285	1.55191e-05	1.88827e-05	4.46181e-06	4.32701e-06	3.31954e-06	1.64497e-06		52.0179
		0.00213094	0.00172081	9.52515e-05	0.000401881	1	3.58149e-06	5.2994e-05	0.000829445	1.91239e-05	1.68891e-05	3.00003e-06	1.75287e-06	1.88258e-06	2.57906e-06		52.0157
		0.00185755	0.00176071	8.91717e-05	0.000427486	1	5.58363e-06	0.000326724	0.000623267	2.8642e-05	1.61963e-05	-3.76968e-08	2.64308e-06	2.83876e-06	3.32689e-06		52.0134
		0.00177683	0.00178546	0.000101481	0.000456011	1	2.23486e-06	0.000120958	0.000789227	1.40748e-05	1.77431e-05	3.01307e-06	4.40132e-06	2.1609e-06	2.22345e-06		52.0112
		0.00187606	0.0018426	0.000232779	0.000443596	1	3.00388e-06	4.57852e-05	0.000707717	2.28263e-05	1.66186e-05	6.11696e-06	2.66382e-06	2.72478e-06	1.87285e-06		52.0089
		0.00185254	0.00176633	8.97508e-05	0.000451893	1	4.08787e-06	4.74574e-05	0.000657035	2.08944e-05	1.90881e-05	3.00971e-06	2.63779e-06	2.02356e-06	2.03777e-06		52.0066
		0.00178205	0.00181436	8.22051e-05	0.000533959	1	2.32825e-06	4.60917e-05	0.00076174	2.31809e-05	1.60694e-05	-3.71774e-08	2.60666e-06	2.53299e-06	1.47059e-06		52.0044
		0.00175228	0.00177716	8.41503e-05	0.000418242	1	1.76308e-06	3.97179e-05	0.000551211	1.42653e-05	1.64998e-05	4.59985e-06	1.78431e-06	2.32702e-06	2.25353e-06		52.0021
		0.00181237	0.00176828	9.18287e-05	0.000457846	1	2.53917e-06	0.000115572	0.000585468	1.51518e-05	1.56348e-05	1.60154e-06	0	4.21659e-06	1.99869e-06		51.9999
		0.00170737	0.00172263	9.75952e-05	0.000448899	1	1.16772e-06	5.27481e-05	0.000703796	1.02118e-05	1.58481e-05	-3.9253e-08	9.17397e-07	2.2521e-06	9.79277e-07		51.9976
		0.00179033	0.0016415	0.00010975	0.000426954	1	2.42976e-06	8.36147e-05	0.000776896	1.4499e-05	1.63681e-05	-3.87984e-08	2.72032e-06	2.78257e-06	2.47938e-06		51.9953
		0.00178396	0.00171698	0.000120159	0.00043245	1	2.535e-06	4.16823e-05	0.000725368	1.78662e-05	1.75204e-05	3.07678e-06	1.79772e-06	2.06866e-06	3.39422e-06		51.9931
		0.0018071	0.00182565	0.000111831	0.000456443	1	1.88003e-06	7.01825e-05	0.000645966	1.33377e-05	1.54407e-05	3.04001e-06	8.88116e-07	2.31648e-06	2.61343e-06		51.9908
		0.00153979	0.00162008	0.000126227	0.000440098	1	2.07121e-06	0.000137918	0.000754609	1.16083e-05	1.75517e-05	3.9853e-06	2.31889e-06	2.96502e-06	9.86135e-07		51.9886
		0.00163556	0.0016678	0.000114147	0.000427342	1	2.11676e-06	5.24851e-05	0.000702842	1.49185e-05	1.4713e-05	2.56915e-06	4.5035e-06	1.26671e-06	1.58308e-06		51.9863
		0.00172165	0.0016166	0.000103337	0.00042197	1	1.42355e-06	4.6095e-05	0.000739107	1.01182e-05	1.59575e-05	1.21746e-06	2.88145e-06	2.5421e-06	2.72013e-06		51.984
		0.00176193	0.00168543	0.000150633	0.000441768	1	1.96567e-06	4.65332e-05	0.000621201	3.52561e-05	1.6576e-05	5.05355e-06	1.46715e-06	2.02596e-06	3.22868e-06		51.9818
		0.00158669	0.00166254	0.000156978	0.000456837	1	1.24333e-06	4.8984e-05	0.000781913	1.1017e-05	1.63322e-05	2.51106e-06	1.46717e-06	2.36369e-06	1.54729e-06		51.9795
		0.00164186	0.00153378	8.61622e-05	0.000446648	1	1.80313e-06	4.33377e-05	0.000665049	1.54966e-05	1.3607e-05	2.43101e-06	1.4204e-06	1.41653e-06	1.34998e-06		51.9772
		0.00166413	0.00169435	0.000295015	0.000480413	1	1.15334e-06	5.14791e-05	0.000724461	1.97979e-05	1.68504e-05	2.54014e-06	2.9684e-06	1.70785e-06	3.26612e-06		51.975
		0.00184366	0.00182959	0.000183512	0.000519006	1	1.40896e-06	5.211e-05	0.00065766	1.74951e-05	1.71746e-05	2.6275e-06	5.37338e-06	2.94446e-06	3.05854e-06		51.9727
		0.00156646	0.00152341	0.00011145	0.000459311	1	1.73451e-06	5.1515e-05	0.000691672	1.57813e-05	1.68238e-05	2.47567e-06	7.23249e-07	1.77549e-06	2.4297e-06		51.9705
		0.00164256	0.0016287	0.000100293	0.000501569	1	1.72151e-06	0.000114958	0.000607866	2.33365e-05	1.63793e-05	3.70103e-06	2.15348e-06	2.42306e-06	1.66363e-06		51.9682
		0.0015819	0.00169629	0.000109729	0.000458091	1	2.36167e-06	5.08e-05	0.00068934	1.30624e-05	1.62974e-05	3.75551e-06	7.28394e-07	3.24117e-06	1.53633e-06		51.9659
		0.00166233	0.00159838	0.000104978	0.000445521	1	1.84681e-06	3.87215e-05	0.000623221	1.5872e-05	1.48236e-05	5.01106e-06	2.18222e-06	1.56247e-06	7.76472e-07		51.9637
		0.00159512	0.00176342	9.2059e-05	0.000415744	1	2.03751e-06	0.000161773	0.000719535	1.59513e-05	1.59095e-05	2.74701e-06	0	2.21636e-06	1.19105e-06		51.9614
		0.00164204	0.00156446	0.000136645	0.000470503	1	3.68259e-06	3.17401e-05	0.000615551	1.72835e-05	1.42102e-05	2.71132e-06	3.96054e-06	2.5522e-06	2.16581e-06		51.9592
		0.00143867	0.00161042	9.25377e-05	0.000405496	1	1.51093e-06	3.84311e-05	0.00197308	1.3711e-05	1.26147e-05	6.59192e-06	2.29368e-06	2.58082e-06	3.52438e-06		51.9569
		0.00166091	0.00167769	9.37491e-05	0.000442575	1	3.18793e-06	3.68995e-05	0.000746066	1.92966e-05	1.45143e-05	2.67036e-06	7.80126e-07	2.15452e-06	4.24642e-06		51.9546
		0.00156735	0.00157192	9.64611e-05	0.00046078	1	2.12173e-06	5.24686e-05	0.00335327	1.71467e-05	1.43305e-05	3.87887e-06	4.51407e-06	1.61598e-06	2.21383e-06		51.9524
		0.00165057	0.00161874	0.000102072	0.00044982	1	2.05043e-06	6.92812e-05	0.000609894	1.29789e-05	1.44064e-05	3.94531e-06	3.82611e-06	2.23073e-06	2.0923e-06		51.9501
		0.00166456	0.00155723	0.000104972	0.000410598	1	1.43212e-06	5.49936e-05	0.000761694	2.46066e-05	1.53809e-05	2.67068e-06	4.68148e-06	2.75339e-06	1.97079e-06		51.9479
		0.00173871	0.00167944	0.000129481	0.00042358	1	1.49489e-06	0.000216146	0.000665333	1.4605e-05	1.61454e-05	5.61047e-06	1.62883e-06	2.62413e-06	2.39656e-06		51.9456
		0.0017277	0.00167638	0.000263427	0.000527803	1	1.85246e-06	0.000113176	0.000610598	2.2302e-05	1.60015e-05	2.49752e-06	2.9186e-06	2.01507e-06	2.90724e-06		51.9433
		0.00163002	0.00157892	0.000140436	0.000466857	1	2.12809e-06	7.83989e-05	0.000719976	1.5014e-05	1.4952e-05	4.12593e-05	3.17684e-06	3.65581e-06	2.50253e-06		51.9411
		0.00166539	0.00149876	0.000193721	0.000442836	1	2.17004e-06	7.69577e-05	0.000689886	1.90325e-05	1.67041e-05	-3.29227e-08	2.30835e-06	3.66001e-06	2.42457e-06		51.9388
		0.0016475	0.00163355	0.000228912	0.000412332	1	2.0049e-06	0.000139868	0.000590089	1.5696e-05	1.74934e-05	4.07147e-06	2.36903e-06	2.66559e-06	1.33652e-06		51.9366
		0.00167716	0.00154679	0.000260375	0.000459599	1	1.94994e-06	7.02925e-05	0.000769482	1.37909e-05	1.62991e-05	1.37418e-06	1.62615e-06	7.73626e-06	1.88437e-06		51.9343
		0.00165193	0.00158695	0.000302128	0.000432958	1	2.70924e-06	8.90318e-05	0.00068614	1.98091e-05	1.72968e-05	5.51697e-06	4.00431e-06	4.66969e-06	2.69037e-06		51.932
		0.00164827	0.00164665	0.000448664	0.000497636	1	1.50652e-06	0.000339366	0.000711365	2.26942e-05	1.73627e-05	-3.51177e-08	8.20749e-07	3.65213e-06	3.78339e-06		51.9298
		0.00152539	0.00153662	0.000374697	0.0004385	1	4.98841e-06	0.000436267	0.00074579	1.52181e-05	1.64937e-05	4.15039e-06	2.41495e-06	3.3349e-06	1.36243e-06		51.9275
		0.00166539	0.00154836	0.000510011	0.000474519	1	2.45003e-06	9.93782e-05	0.000939646	1.48388e-05	1.68624e-05	2.83236e-06	3.30989e-06	4.31687e-06	1.74527e-06		51.9253
		0.00168301	0.00169912	0.000430332	0.000444464	1	1.43806e-06	0.000343788	0.000889684	1.7095e-05	1.75293e-05	2.68176e-06	5.48435e-06	4.92903e-06	2.63196e-06		51.923
		0.00171636	0.00169897	0.000346265	0.000437923	1	4.85704e-06	0.000103598	0.000656612	1.67224e-05	1.62126e-05	1.29526e-06	3.0656e-06	2.23416e-06	1.61645e-06		51.9207
		0.00165612	0.00155967	0.00031987	0.000424264	1	2.52996e-06	9.84476e-05	0.000797116	1.9225e-05	1.71473e-05	3.85582e-06	2.99147e-06	4.36067e-06	1.10991e-06		51.9185
		0.00161452	0.0017458	0.000508998	0.000436628	1	5.84998e-06	9.02012e-05	0.000640341	1.86264e-05	1.68423e-05	4.0413e-06	3.13538e-06	3.6081e-06	2.14321e-06		51.9162
		0.00163989	0.00173681	0.000279699	0.000419743	1	2.18136e-06	8.44054e-05	0.000724291	1.01128e-05	1.70485e-05	3.98788e-06	3.86739e-06	2.49218e-06	2.75954e-06		51.914
		0.00164079	0.00168498	0.000265799	0.00044745	1	3.32718e-06	0.000144214	0.000808642	1.39514e-05	1.83122e-05	5.08389e-06	2.95199e-06	2.37784e-06	4.017e-06		51.9117
		0.00177874	0.00160883	0.000247447	0.000430447	1	3.42832e-06	8.49961e-05	0.000697864	9.64129e-06	1.59266e-05	5.07991e-06	2.2122e-06	3.50757e-06	7.8714e-07		51.9094
		0.00163006	0.00169082	0.000449581	0.000505585	1	3.19804e-06	8.49396e-05	0.000722091	2.02454e-05	1.60574e-05	1.23747e-06	3.661e-06	3.03331e-06	2.30715e-06		51.9072
		0.00158028	0.00175756	0.000172742	0.000439375	1	3.24202e-06	9.08032e-05	0.000591601	2.77375e-05	1.86652e-05	2.54073e-06	7.42254e-07	2.84722e-06	2.18421e-06		51.9049
		0.00157419	0.00157206	0.00017803	0.00040155	1	2.00346e-06	0.000106615	0.000608635	1.20491e-05	1.95972e-05	2.43163e-06	3.55199e-06	3.81514e-06	2.38647e-06		51.9027
		0.00172072	0.00197557	0.000246424	0.000479099	1	1.87596e-06	0.000166748	0.000981781	1.93487e-05	1.72417e-05	2.67756e-06	3.129e-06	2.52042e-06	2.62784e-06		51.9004
		0.00168703	0.00187017	0.000195286	0.000450758	1	2.60317e-06	0.000113048	0.000850835	2.20248e-05	1.55106e-05	-3.29245e-08	3.07804e-06	3.06977e-06	2.10401e-06		51.8981
		0.00158335	0.00160848	0.000182515	0.000398896	1	2.38325e-06	0.000108537	0.000710277	1.96103e-05	1.8158e-05	2.51607e-06	4.41045e-06	4.17323e-06	2.77566e-06		51.8959
		0.00173099	0.00168324	0.000204169	0.000461213	1	2.13655e-06	9.05567e-05	0.000869723	1.64461e-05	1.49448e-05	-3.08744e-08	4.32962e-06	3.32157e-06	3.32624e-06		51.8936
		0.00160164	0.0016181	0.000226639	0.000456094	1	2.11433e-06	8.75288e-05	0.00080655	1.34444e-05	2.20956e-05	3.86534e-06	2.99886e-06	4.25639e-06	2.67474e-06		51.8914
		0.00156032	0.00168459	0.00376257	0.000406319	1	2.38838e-06	0.000225407	0.00075954	1.74631e-05	1.5718e-05	2.41663e-06	2.82407e-06	2.49147e-06	7.52154e-06		51.8891
		0.00163906	0.00166012	0.00138663	0.000431673	1	3.85879e-06	9.79004e-05	0.000712534	1.80819e-05	1.7953e-05	3.92315e-06	0	1.63443e-06	2.39766e-06		51.8868
		0.00175617	0.00151584	0.000222835	0.000389755	1	2.41069e-06	9.64926e-05	0.000674035	1.8391e-05	1.75425e-05	1.25661e-06	4.46123e-06	2.16749e-06	2.03298e-06		51.8846
		0.00158986	0.00147163	0.000229921	0.000421963	1	3.92835e-06	0.000160928	0.000733092	1.61496e-05	1.89638e-05	-3.31442e-08	3.8732e-06	2.61479e-06	1.79526e-06		51.8823
		0.00162678	0.00159725	0.000227746	0.000383439	1	1.90179e-06	0.000116469	0.000738734	9.79373e-06	1.62615e-05	-3.20503e-08	4.49452e-06	2.64343e-06	1.89208e-06		51.88
		0.00156752	0.00153725	0.000379501	0.000406667	1	2.19648e-06	0.000105136	0.000814621	1.16964e-05	1.65622e-05	2.66591e-06	1.55765e-06	2.03142e-06	1.31816e-06		51.8778
		0.0015455	0.00162535	0.000269497	0.000450242	1	2.21373e-06	0.000109561	0.000811791	2.50325e-05	1.72255e-05	2.55919e-06	7.47647e-07	2.17954e-06	1.73273e-06		51.8755
		0.00168284	0.00165542	0.000289097	0.000418636	1	2.33717e-06	0.000131414	0.000912084	2.48941e-05	1.77484e-05	-3.37736e-08	1.57867e-06	3.02782e-06	3.4741e-06		51.8733
		0.00169469	0.00169093	0.000368821	0.000385848	1	2.41536e-06	0.000170228	0.000806782	1.24519e-05	1.54382e-05	6.7142e-06	3.11506e-06	2.9872e-06	2.12932e-06		51.871
		0.00155257	0.00193544	0.000292685	0.000504187	1	6.68932e-06	0.000160777	0.000822355	2.07776e-05	0.000102628	2.66584e-06	4.67298e-06	3.82404e-06	2.94088e-06		51.8687
		0.00188953	0.0016571	0.000318521	0.000373198	1	2.42662e-06	0.000362412	0.000818334	1.32701e-05	1.69847e-05	4.03383e-06	2.81705e-05	2.04068e-06	3.11739e-06		51.8665
		0.00201585	0.00182144	0.00032974	0.00053706	1	3.08421e-05	0.000153357	0.000750506	1.02606e-05	1.82548e-05	4.04617e-06	7.06323e-06	4.57595e-06	3.12693e-06		51.8642
		0.0016487	0.00162109	0.00026121	0.000414379	1	0.000103838	0.000120406	0.000795666	1.4381e-05	1.71046e-05	-3.25485e-08	4.56437e-06	1.44803e-05	1.92149e-06		51.862
		0.00172379	0.00163304	0.000439135	0.000397118	1	2.31561e-06	0.000128598	0.000732335	2.08643e-05	1.81917e-05	2.67696e-06	3.91035e-06	2.87987e-06	#VALUE!		51.8597
		0.00171395	0.00168099	0.000224732	0.000451403	1	1.64276e-06	0.000439472	0.000850338	1.61789e-05	1.53844e-05	1.31157e-06	4.65634e-06	2.38137e-06	1.81213e-05		51.8575
		0.00168062	0.00209872	0.000230451	0.000412193	1	2.63942e-06	8.55766e-05	0.000691763	1.39916e-05	1.97061e-05	-3.3383e-08	2.34062e-06	4.54935e-06	1.97075e-06		51.8552
		0.0016554	0.00166174	0.000379939	0.000383613	1	6.48104e-06	9.74865e-05	0.000802372	2.51219e-05	1.52002e-05	2.81331e-06	2.46566e-06	2.77432e-06	3.44611e-06		51.8529
		0.00177407	0.00165969	0.000255936	0.000437036	1	3.40172e-06	0.000368582	0.000892173	1.01828e-05	2.02757e-05	2.66588e-06	3.11535e-06	3.8241e-06	2.77864e-06		51.8507
		0.00179572	0.00156829	0.000268797	0.000437228	1	2.37019e-06	0.00025237	0.000830139	1.66613e-05	1.65993e-05	2.50227e-06	4.38627e-06	3.25286e-06	2.4558e-06		51.8484
		0.00186637	0.00183915	0.000252698	0.000456419	1	3.05293e-06	0.000102287	0.000709133	2.51539e-05	2.22031e-05	3.98926e-06	3.095e-06	3.08669e-06	7.27548e-06		51.8462
		0.00169652	0.00164871	0.000373349	0.000528129	1	2.70305e-06	9.89844e-05	0.00136787	1.82293e-05	2.19282e-05	3.95515e-06	2.30134e-06	5.76815e-06	3.85586e-06		51.8439
		0.00170905	0.0017732	0.00026591	0.000468416	1	2.44686e-06	9.07772e-05	0.00102236	1.06003e-05	2.78538e-05	3.89098e-06	5.28283e-06	2.77903e-06	3.007e-06		51.8416
		0.00173201	0.00169667	0.000271325	0.000493194	1	7.72907e-06	0.00171571	0.000671888	1.48254e-05	1.88506e-05	4.04329e-06	4.70542e-06	2.64714e-06	2.47108e-06		51.8394
		0.00173643	0.00181543	0.000215477	0.000509153	1	3.58818e-06	0.000156696	0.000799572	1.98403e-05	2.06063e-05	3.97923e-06	3.859e-06	3.07893e-06	1.94948e-06		51.8371
		0.0017162	0.00184423	0.00022786	0.000522415	1	2.78057e-06	0.000149278	0.000740797	2.3194e-05	1.7567e-05	3.91235e-06	4.55304e-06	4.1917e-06	3.18165e-06		51.8348
		0.00157839	0.00168307	0.000201204	0.000457116	1	3.55107e-06	8.86255e-05	0.000856656	1.83379e-05	1.9054e-05	2.53769e-06	5.18972e-06	3.18513e-06	2.49056e-06		51.8326
		0.00170723	0.00168925	0.000240957	0.000407835	1	8.26025e-06	0.000200827	0.00092276	2.13452e-05	1.71865e-05	1.06691e-05	3.08792e-06	2.8427e-06	5.64988e-06		51.8303
		0.00163407	0.00158762	0.000607504	0.00045874	1	3.13423e-06	0.000109537	0.000832791	1.5245e-05	1.96274e-05	1.19296e-05	6.90319e-06	4.82541e-06	3.05608e-06		51.8281
		0.00174054	0.00161514	0.000173957	0.000375805	1	2.57657e-06	0.00037575	0.000705625	#VALUE!	1.88146e-05	7.88658e-06	3.80822e-06	3.85658e-06	3.35216e-06		51.8258
		0.00160939	0.00160615	0.000256076	0.000415113	1	4.04892e-06	7.97468e-05	0.000697534	1.60825e-05	1.87797e-05	1.24569e-06	5.15952e-06	3.73214e-06	3.39757e-06		51.8235
		0.00159683	0.00159593	0.000590015	0.000422416	1	4.40686e-06	8.95111e-05	0.000814642	1.96634e-05	1.99336e-05	3.66653e-06	5.68931e-06	2.5096e-06	5.05651e-06		51.8213
		0.00164787	0.00154385	0.00016464	0.00044124	1	2.14114e-06	7.86715e-05	0.000708309	2.51262e-05	1.88143e-05	3.55926e-06	2.76139e-06	3.17772e-06	2.46294e-06		51.819
		0.00159768	0.00149913	0.000280358	0.0003812	1	2.49403e-06	7.96086e-05	0.000902457	2.09467e-05	2.03895e-05	6.10248e-06	3.53904e-06	5.10482e-06	3.8527e-06		51.8168
		0.00164969	0.00171939	0.000348242	0.000434361	1	4.07764e-06	0.000238692	0.000735385	2.35288e-05	2.16519e-05	1.2232e-06	1.01331e-05	4.7755e-06	5.14614e-06		51.8145
		0.00167577	0.00166774	0.000397179	0.000422976	1	3.53289e-06	0.000116882	0.000639273	2.32615e-05	1.91201e-05	7.63748e-06	3.68793e-06	4.75355e-06	2.93888e-06		51.8122
		0.00169005	0.00170723	0.00020226	0.000412068	1	2.07097e-06	0.00220356	0.000760761	3.45783e-05	1.96875e-05	5.05871e-06	3.67169e-06	5.97243e-06	3.84407e-06		51.81
		0.00160257	0.00159263	0.000200806	0.000457177	1	3.56099e-06	0.000773959	0.000935245	3.19027e-05	1.96035e-05	2.47217e-06	5.05572e-06	4.43295e-06	3.93125e-06		51.8077
		0.00173704	0.00168591	0.000259643	0.000470895	1	3.07936e-06	0.00012961	0.000793585	2.29199e-05	1.86671e-05	4.85679e-06	2.82012e-06	3.7863e-06	4.1314e-06		51.8055
		0.00167271	0.00185218	0.000333277	0.000513758	1	3.93569e-06	0.000114462	0.000959463	2.24744e-05	2.05285e-05	7.61366e-06	2.94116e-06	4.51303e-06	3.23615e-06		51.8032
		0.00158973	0.00166436	0.000309827	0.000459559	1	2.74946e-06	0.000113029	0.000650328	2.0747e-05	2.06159e-05	6.46919e-06	7.50327e-07	4.02967e-06	#VALUE!		51.8009
		0.00169561	0.00165097	0.000244247	0.000469744	1	2.84498e-06	0.000294048	0.000768526	2.27397e-05	2.03708e-05	2.46807e-06	4.32631e-06	6.63905e-06	6.47932e-06		51.7987
		0.00174866	0.00163631	0.000275345	0.00043637	1	2.27069e-06	9.26946e-05	0.000729296	1.66859e-05	1.92218e-05	1.23732e-06	3.66057e-06	4.38119e-06	1.54415e-06		51.7964
		0.00162743	0.00162563	0.000237808	0.000428572	1	2.5282e-06	9.90751e-05	0.00110176	2.06642e-05	1.82956e-05	2.55811e-06	5.97887e-06	4.93115e-06	3.28923e-06		51.7942
		0.00168587	0.00179559	0.00219632	0.000439577	1	3.33569e-06	9.34529e-05	0.000699665	2.87218e-05	1.73935e-05	4.0686e-06	5.52399e-06	5.81248e-06	2.65098e-06		51.7919
		0.00166267	0.00168064	0.000271482	0.000576558	1	2.09408e-06	0.000120201	0.000786286	1.93305e-05	2.68487e-05	4.0293e-06	4.68913e-06	4.79675e-06	2.13684e-06		51.7896
		0.00165631	0.00214381	0.000722346	0.000418275	1	2.9439e-06	9.1913e-05	0.000816949	2.28967e-05	2.3146e-05	5.32987e-06	4.64226e-06	5.81755e-06	2.92155e-06		51.7874
		0.00154526	0.00170192	0.000241393	0.000395041	1	2.91947e-06	8.84633e-05	0.000704583	1.55889e-05	1.96297e-05	7.39787e-06	7.14469e-06	3.6176e-06	3.2933e-06		51.7851
		0.00176434	0.00173226	0.000273269	0.000453497	1	2.69952e-06	0.00212252	0.000747919	3.08627e-05	2.57249e-05	3.94997e-06	3.83063e-06	5.29023e-06	3.69117e-06		51.7829
		0.00164447	0.00166208	0.00023181	0.000419732	1	5.70943e-06	0.000171476	0.000631605	1.75183e-05	1.87015e-05	1.01886e-05	5.1605e-06	4.29853e-06	2.47654e-06		51.7806
		0.00173751	0.0017448	0.00032208	0.000445745	1	2.12369e-06	0.000120733	0.000877615	1.35039e-05	2.25277e-05	5.18747e-06	1.50603e-06	4.0441e-06	3.94192e-06		51.7783
		0.00168463	0.00174074	0.000182898	0.0004016	1	1.56655e-06	7.52535e-05	0.000737198	1.9024e-05	2.14003e-05	5.09803e-06	5.18037e-06	3.40651e-06	2.79447e-06		51.7761
		0.00158751	0.00165986	0.000143723	0.000446302	1	1.86502e-06	7.01305e-05	0.000624045	1.38343e-05	1.78112e-05	2.38245e-06	1.39203e-06	2.56304e-06	2.91833e-06		51.7738
		0.00164787	0.00164521	0.00011926	0.000337605	1	2.84152e-06	0.000344774	0.000631344	2.27121e-05	1.88282e-05	-3.08133e-08	3.60082e-06	3.53604e-06	2.41929e-06		51.7715
		0.00169873	0.00162499	0.000117786	0.000442309	1	1.48893e-05	0.000110987	0.000626233	1.68549e-05	1.68742e-05	3.81286e-06	4.43725e-06	3.85811e-06	4.95006e-06		51.7693
		0.00151037	0.0015611	9.97144e-05	0.000332039	1	2.37529e-06	0.00187035	0.00188199	1.53205e-05	1.62547e-05	4.83693e-06	1.40426e-06	4.52513e-06	1.34822e-05		51.767
		0.00167284	0.00154437	0.000113821	0.000416427	1	2.17235e-06	8.77834e-05	0.00118929	1.75558e-05	1.81738e-05	1.30183e-06	6.16237e-06	2.24549e-06	4.67432e-06		51.7648
		0.00162087	0.00159249	0.000113528	0.00035656	1	4.74365e-06	6.06263e-05	0.000842388	1.91198e-05	1.81012e-05	1.21124e-06	1.43333e-06	3.079e-06	5.54391e-06		51.7625
		0.0017566	0.0016256	0.000103661	0.000391793	1	1.86831e-06	8.1809e-05	0.000850311	2.60687e-05	1.85048e-05	5.0694e-06	2.94358e-06	4.62968e-06	1.58183e-05		51.7602
		0.00166055	0.00157949	0.000356646	0.000396068	1	2.30731e-06	6.47271e-05	0.00073365	2.92453e-05	1.83768e-05	3.83549e-06	2.9757e-06	2.62525e-06	1.1027e-05		51.758
		0.00164589	0.00162645	8.94238e-05	0.000329047	1	1.16209e-06	0.000409492	0.000566173	1.34088e-05	1.90512e-05	-3.19925e-08	2.99091e-06	2.52393e-06	4.69324e-06		51.7557
		0.00154871	0.00147665	0.000140203	0.000334633	1	8.04658e-07	5.65582e-05	0.000679671	9.98269e-06	1.9606e-05	4.89597e-06	3.55357e-06	3.48963e-06	4.75717e-06		51.7535
		0.00162734	0.00153692	0.000101398	0.000370396	1	2.78546e-06	0.000132511	0.00067398	1.80638e-05	1.72607e-05	1.28473e-06	4.56106e-06	2.09935e-06	3.02884e-06		51.7512
		0.00182742	0.00165479	9.3353e-05	0.000428165	1	1.89934e-06	9.30549e-05	0.000749515	1.65114e-05	2.26389e-05	5.45589e-06	2.37594e-06	5.83354e-06	5.30122e-06		51.749
		0.00159915	0.00165782	0.000245818	0.000382434	1	1.92474e-06	5.20957e-05	0.000686938	1.63713e-05	1.79035e-05	2.45873e-06	1.4366e-06	4.18837e-06	3.16145e-06		51.7467
		0.00160321	0.00158531	0.000115157	0.000366763	1	1.98877e-06	7.0005e-05	0.000597153	1.60722e-05	1.74982e-05	1.19182e-06	4.2312e-06	3.02964e-06	4.71079e-05		51.7444
		0.00152401	0.00158384	0.000119968	0.000365201	1	1.3299e-06	4.69339e-05	0.000636878	2.18778e-05	1.69227e-05	1.13737e-06	6.7296e-07	1.96182e-06	2.82167e-06		51.7422
		0.00167631	0.00167874	7.98409e-05	0.000376598	1	2.66382e-06	9.31256e-05	0.000622832	2.50461e-05	1.72324e-05	-3.11044e-08	2.90789e-06	3.23476e-06	3.35102e-06		51.7399
		0.00148952	0.00149846	0.000144871	0.000352879	1	1.48307e-06	3.61251e-05	0.000663032	1.18831e-05	1.78508e-05	4.82636e-06	4.90431e-06	2.90244e-06	3.22952e-06		51.7377
		0.00170939	0.00162386	0.000106499	0.000329245	1	4.28793e-05	7.98283e-05	0.000645296	1.94168e-05	1.94318e-05	2.49125e-06	2.1834e-06	3.23852e-06	2.89993e-06		51.7354
		0.00176845	0.00160982	9.15582e-05	0.000388906	1	1.23802e-06	0.000465756	0.000633104	1.38091e-05	1.94217e-05	6.29785e-06	3.65234e-06	2.91404e-06	3.21495e-06		51.7331
		0.00168156	0.00171873	8.83813e-05	0.000305691	1	8.26865e-06	5.85085e-05	0.00071506	2.14576e-05	1.73483e-05	2.48186e-06	3.62536e-06	2.78125e-06	8.48028e-06		51.7309
		0.00182123	0.00165582	0.000165375	0.00040431	1	1.42908e-06	5.92942e-05	0.000576369	2.56177e-05	1.65808e-05	2.47531e-06	7.23144e-07	2.88488e-06	1.82662e-06		51.7286
		0.00167169	0.00160746	0.00032332	0.000409344	1	1.53856e-06	0.000565147	0.000651656	1.79778e-05	2.05342e-05	2.39013e-05	2.18043e-06	3.90336e-06	3.80474e-06		51.7264
		0.00161499	0.00180079	8.88913e-05	0.000372053	1	1.03568e-06	0.000213148	0.000795556	1.45634e-05	2.73682e-05	3.77768e-06	2.93085e-06	2.24838e-06	4.29361e-06		51.7241
		0.00163943	0.00176526	9.69273e-05	0.000448213	1	1.99435e-06	0.00142453	0.000667317	1.91332e-05	2.01195e-05	6.41703e-06	2.23283e-06	3.6545e-06	5.91263e-06		51.7218
		0.00171338	0.00178001	9.06858e-05	0.000415836	1	1.58609e-06	9.15416e-05	0.000627024	1.92613e-05	2.52423e-05	1.26633e-06	4.49571e-06	3.10405e-06	4.70298e-06		51.7196
		0.00188187	0.00179988	0.000271567	0.000441987	1	-1.03057e-07	0.000103037	0.000691028	2.2809e-05	1.87828e-05	2.63818e-06	2.31217e-06	2.36508e-06	5.15895e-06		51.7173
		0.0018379	0.00196719	8.31321e-05	0.000488357	1	1.51967e-06	0.00011928	0.000620564	1.82738e-05	1.75467e-05	1.29966e-06	4.61407e-06	6.01828e-06	3.70503e-06		51.715
		0.00184811	0.00173554	0.000122644	0.000435995	1	1.23929e-06	4.70305e-05	0.000675232	1.73988e-05	1.94324e-05	9.63854e-06	1.59476e-06	4.64948e-06	3.50951e-06		51.7128
		0.00176475	0.00173303	7.75036e-05	0.000386816	1	1.89574e-06	0.000122084	0.000662034	1.84693e-05	1.99359e-05	2.55587e-06	4.48021e-06	3.32252e-06	2.5084e-06		51.7105
		0.00205963	0.00177644	0.000116935	0.000499005	1	1.21337e-06	4.98125e-05	0.0010032	1.0966e-05	1.79006e-05	5.37822e-06	3.9036e-06	3.59373e-06	1.64667e-06		51.7083
		0.00222138	0.00185236	8.41009e-05	0.000419465	1	2.84313e-06	4.36043e-05	0.000633857	2.44699e-05	1.58116e-05	2.65585e-06	2.32766e-06	3.33343e-06	3.89996e-06		51.706
		0.00182668	0.00169748	7.27563e-05	0.000453873	1	2.21647e-06	8.33596e-05	0.000626448	1.4879e-05	2.00695e-05	-3.20294e-08	4.49158e-06	2.87145e-06	2.67074e-06		51.7037
		0.00171812	0.00182438	7.89183e-05	0.000455476	1	2.04253e-06	5.44084e-05	0.000634926	2.07295e-05	1.97384e-05	6.24424e-06	#VALUE!	4.6676e-06	3.03667e-06		51.7015
		0.00190937	0.00190736	7.01464e-05	0.000490718	1	7.30727e-07	4.34668e-05	0.000631404	1.96612e-05	2.27014e-05	5.07686e-06	2.94791e-06	3.73166e-06	3.55072e-06		51.6992
		0.00198797	0.00174339	9.27197e-05	0.000439938	1	1.12391e-06	0.000155098	0.00071317	1.99953e-05	2.66901e-05	3.72842e-06	2.16942e-06	4.43857e-06	3.18276e-06		51.697
		0.00212892	0.00189595	7.67191e-05	0.000448288	1	8.2317e-07	4.97617e-05	0.000492626	1.44512e-05	2.64309e-05	1.22879e-06	3.63532e-06	4.35098e-06	3.65448e-06		51.6947
		0.00192789	0.00178951	0.000136527	0.000447944	1	1.0586e-06	0.000327897	0.000719211	2.6777e-05	1.94701e-05	8.23326e-06	2.72456e-06	3.13534e-06	5.8368e-06		51.6924
		0.00171843	0.00196667	0.000145497	0.000422029	1	1.1524e-06	6.0045e-05	0.000602857	1.68184e-05	1.80785e-05	3.50566e-06	0	3.96466e-06	4.69293e-06		51.6902
		0.00197558	0.00187771	9.34671e-05	0.000513262	1	9.40529e-07	5.53733e-05	0.000677216	1.82771e-05	1.93186e-05	2.52927e-06	2.9557e-06	3.85492e-06	5.40797e-06		51.6879
		0.00192157	0.00189667	0.000158934	0.000517145	1	3.2138e-06	0.000291042	0.000703668	2.17753e-05	2.32371e-05	2.51861e-06	4.4149e-06	3.49992e-06	2.18024e-05		51.6857
		0.00192486	0.00192019	8.31852e-05	0.000501375	1	4.23633e-07	0.000147155	0.000785379	2.6349e-05	2.13439e-05	2.54597e-06	2.97522e-06	3.4238e-06	1.42821e-05		51.6834
		0.00184818	0.00188634	0.000131594	0.0005431	1	5.64764e-06	0.000158029	0.000998783	2.32836e-05	1.92016e-05	2.45154e-06	5.72981e-06	#VALUE!	7.92879e-06		51.6811
		0.00177693	0.00193136	0.000106507	0.00052396	1	1.39187e-06	0.000101243	0.00075773	2.49507e-05	2.2243e-05	8.51363e-06	4.22604e-06	3.67447e-06	6.76958e-06		51.6789
		0.001929	0.00191844	8.92494e-05	0.000578666	1	4.00951e-07	0.000287356	0.000855504	1.94651e-05	1.64533e-05	3.62955e-06	4.92789e-06	2.80837e-06	5.29894e-06		51.6766
		0.00212794	0.00195064	0.000256533	0.000561302	1	2.1682e-06	5.65071e-05	0.000765924	1.81128e-05	1.90638e-05	-3.13318e-08	4.39375e-06	3.37077e-06	4.90154e-06		51.6744
		0.00191171	0.0018394	0.000183073	0.000552685	1	3.99948e-07	6.65778e-05	0.000517733	1.46397e-05	1.78138e-05	-3.00454e-08	4.91556e-06	2.69358e-06	3.96859e-06		51.6721
		0.00183252	0.00179493	0.000359056	0.000560591	1	5.00625e-07	5.36089e-05	0.000730263	2.29157e-05	1.77255e-05	-3.01602e-08	1.40977e-06	4.00197e-06	5.30588e-06		51.6698
		0.00186964	0.00179377	7.08068e-05	0.000538577	1	8.75565e-07	0.00162108	0.00132254	1.50093e-05	1.55432e-05	3.54657e-06	2.06361e-06	3.79979e-06	3.17085e-06		51.6676
		0.00181606	0.00184975	0.000119837	0.000563848	1	8.8866e-07	0.000142129	0.000737197	1.31985e-05	1.87178e-05	2.38978e-06	4.18908e-06	2.67807e-06	4.38221e-06		51.6653
		0.00184127	0.00180372	7.22088e-05	0.000513386	1	5.65339e-07	4.83109e-05	0.000542789	1.96629e-05	1.71499e-05	5.72846e-06	2.65772e-06	2.75255e-06	4.58581e-06		51.6631
		0.002042	0.00205731	5.63969e-05	0.000593509	1	7.95594e-07	0.000121053	0.000825966	1.87471e-05	1.56444e-05	3.62301e-06	4.21631e-06	3.45033e-06	3.6785e-06		51.6608
		0.00168479	0.00172874	0.00186192	0.000613349	1	2.84786e-06	0.000100233	0.000624173	1.40458e-05	1.70911e-05	1.13864e-06	2.02114e-06	2.89446e-06	7.17756e-06		51.6585
		0.00201197	0.00195546	0.000134962	0.000588074	1	7.11139e-07	6.44021e-05	0.000671607	1.84372e-05	1.71604e-05	3.69781e-06	2.86888e-06	3.63163e-06	3.15663e-06		51.6563
		0.00180305	0.00189233	7.46003e-05	0.000761628	1	4.00483e-07	3.96465e-05	0.000679445	2.28591e-05	1.54985e-05	-3.00856e-08	3.51578e-06	3.45253e-06	5.87895e-06		51.654
		0.00197915	0.00192705	8.16883e-05	0.000706026	1	4.07633e-07	3.49134e-05	0.000598935	1.42255e-05	1.67275e-05	1.2096e-06	4.29432e-06	4.50272e-06	3.8957e-06		51.6517
		0.00197497	0.00187501	0.000120798	0.00071958	1	9.18894e-07	4.45879e-05	0.000640074	2.41707e-05	1.79935e-05	7.47529e-06	5.05351e-06	1.88296e-06	4.8322e-06		51.6495
		0.00200389	0.00199457	0.00059899	0.000683135	1	8.23529e-07	5.00534e-05	0.000869456	1.79916e-05	1.92589e-05	2.48977e-06	3.63691e-06	3.57147e-06	4.71715e-06		51.6472
		0.00192755	0.00192206	6.28503e-05	0.000617154	1	7.98153e-07	3.64806e-05	0.00117976	2.63436e-05	1.56947e-05	3.63466e-06	2.81989e-06	3.46142e-06	6.92263e-06		51.645
		0.00187063	0.00189098	0.000188675	0.000636822	1	1.36083e-06	0.000185339	0.000836843	1.90405e-05	1.67816e-05	4.74378e-06	2.7545e-06	2.32443e-06	4.03527e-06		51.6427
		0.00190718	0.00188408	0.000184361	0.000733108	1	1.67731e-06	7.08613e-05	0.000620113	1.72998e-05	1.37876e-05	6.03007e-06	3.49705e-06	4.07814e-06	4.82726e-06		51.6405
		0.00179958	0.002043	6.12621e-05	0.000743804	1	1.26212e-06	5.15209e-05	0.000726993	1.69725e-05	1.64139e-05	5.13002e-06	3.72345e-06	3.08506e-06	4.98459e-06		51.6382
		0.00195111	0.00181097	7.8821e-05	0.000621155	1	4.74922e-07	3.94405e-05	0.000646158	1.97895e-05	1.71862e-05	5.76536e-06	4.68099e-06	5.64394e-06	4.33665e-06		51.6359
		0.00187737	0.00185138	8.39859e-05	0.00072882	1	1.64052e-06	7.71382e-05	0.000521312	2.50367e-05	1.71454e-05	6.26532e-06	5.81367e-06	8.36451e-06	5.31849e-06		51.6337
		0.00177921	0.00187051	9.16671e-05	0.000632644	1	1.16723e-06	4.95644e-05	0.000891811	2.03812e-05	1.70126e-05	4.74431e-06	2.06605e-06	3.69861e-06	3.31813e-06		51.6314
		0.00197686	0.00187148	0.000549067	0.000729739	1	8.51736e-07	6.75518e-05	0.000614571	1.78768e-05	1.62479e-05	2.57505e-06	4.51383e-06	3.80925e-06	3.62454e-06		51.6292
		0.00195288	0.00199843	0.000103638	0.000791475	1	8.70277e-07	5.13257e-05	0.000650909	2.87241e-05	1.87324e-05	3.9631e-06	3.84336e-06	4.59997e-06	3.54326e-06		51.6269
		0.00222473	0.00174548	7.00045e-05	0.000769675	1	1.0659e-06	0.000106251	0.000751484	1.02996e-05	1.87673e-05	2.34754e-06	3.42915e-06	3.4727e-06	4.16182e-06		51.6246
		0.00195497	0.00196272	0.000249844	0.000779264	1	5.02362e-07	6.41725e-05	0.000556723	1.95581e-05	1.79439e-05	2.42118e-06	2.12199e-06	3.36453e-06	3.99757e-06		51.6224
		0.0019396	0.00190398	0.000149718	0.000865941	1	2.96286e-06	0.000132481	0.000592325	2.14573e-05	1.82326e-05	2.48183e-06	4.35044e-06	3.89391e-06	5.00432e-06		51.6201
		0.00184638	0.00190859	0.000175551	0.000774888	1	8.80478e-07	6.77701e-05	0.000585765	9.04413e-06	2.11547e-05	3.56647e-06	6.91763e-06	3.92728e-06	8.52307e-06		51.6178
		0.00202578	0.00208939	6.83464e-05	0.000761849	1	1.26666e-06	3.93674e-05	0.000647748	1.26761e-05	1.85447e-05	5.14845e-06	5.2316e-06	5.73424e-06	4.53525e-06		51.6156
		0.00199396	0.001999	9.60061e-05	0.000753167	1	1.1483e-06	0.000208002	0.000574163	1.61214e-05	1.83334e-05	6.3701e-06	3.69425e-06	4.87508e-06	4.79152e-06		51.6133
		0.00202588	0.00203517	0.000140003	0.000842989	1	9.30505e-07	0.000263524	0.000451661	1.16889e-05	1.78966e-05	2.50231e-06	4.38634e-06	5.1602e-06	2.76049e-06		51.6111
		0.00202626	0.0019901	7.41434e-05	0.000792782	1	2.64676e-06	2.9211e-05	0.000683571	1.71643e-05	2.00862e-05	7.47932e-06	5.7786e-06	4.10084e-06	7.84575e-06		51.6088
		0.00194367	0.00205483	0.000121947	0.000878236	1	8.76363e-07	0.000231568	0.000670873	1.91459e-05	1.92068e-05	6.67356e-06	1.54806e-06	4.51334e-06	4.37455e-06		51.6065
		0.00210919	0.00230196	0.000104805	0.00073985	1	2.78891e-06	8.67356e-05	0.000621769	1.51278e-05	2.07428e-05	2.60521e-06	4.5667e-06	6.19014e-06	3.82558e-06		51.6043
		0.0018371	0.001888	8.33752e-05	0.000836908	1	7.893e-07	7.58167e-05	0.000833318	1.31792e-05	1.76852e-05	4.80252e-06	6.27449e-06	5.13494e-06	3.79467e-06		51.602
		0.00208065	0.0018606	9.32778e-05	0.000741069	1	4.37908e-07	4.04999e-05	0.000735283	1.67763e-05	1.9334e-05	1.06262e-05	5.38211e-06	5.19115e-06	4.50549e-06		51.5998
		0.00198972	0.00191548	9.10375e-05	0.000715032	1	7.04017e-07	0.000270937	0.000961875	1.82525e-05	1.63586e-05	2.43039e-06	2.84015e-06	6.53771e-06	5.04857e-06		51.5975
		0.00193437	0.00192357	0.000117794	0.000732414	1	1.80592e-06	3.193e-05	0.000736908	2.10504e-05	0.000245363	-3.04346e-08	2.84527e-06	3.49258e-06	6.0954e-06		51.5953
		0.00194915	0.00193911	8.2204e-05	0.000758372	1	6.36861e-07	3.77611e-05	0.000604007	1.56043e-05	1.77425e-05	5.15617e-06	6.73653e-06	4.70892e-06	6.56994e-06		51.593
		0.00192519	0.00197599	8.26415e-05	0.000815835	1	1.60969e-06	9.37316e-05	0.000734781	1.14198e-05	1.87001e-05	6.55611e-06	6.0835e-06	4.31721e-06	3.02987e-06		51.5907
		0.00190973	0.00194981	0.000117684	0.000798391	1	2.23519e-06	4.11685e-05	0.000682014	2.06269e-05	1.51654e-05	7.46229e-06	5.04472e-06	4.3127e-06	6.02536e-06		51.5885
		0.00205966	0.00179903	8.79193e-05	0.000821336	1	3.09352e-07	4.8429e-05	0.000926818	2.27473e-05	1.61379e-05	6.21863e-06	1.44253e-06	3.87359e-06	3.47511e-06		51.5862
		0.00187034	0.00186487	0.000102849	0.000860265	1	4.60013e-06	4.49414e-05	0.000560031	6.24095e-06	1.58159e-05	6.54888e-06	3.79793e-06	4.66217e-06	4.29282e-06		51.5839
		0.00197448	0.00189278	0.000239019	0.000871226	1	1.40687e-06	5.04681e-05	0.000946724	1.15107e-05	1.61294e-05	3.95178e-06	5.36539e-06	4.23394e-06	4.4915e-06		51.5817
		0.00199685	0.00187041	0.000141608	0.000829859	1	7.45493e-07	6.77926e-05	0.00108595	1.27524e-05	1.86564e-05	2.57357e-06	4.51125e-06	3.5763e-06	5.03262e-06		51.5794
		0.0019467	0.00191147	0.000236093	0.000877588	1	4.48672e-07	7.52742e-05	0.000706293	2.25474e-05	1.78874e-05	2.69645e-06	4.72665e-06	3.74705e-06	4.28791e-06		51.5772
		0.00199966	0.00189815	0.000177006	0.000856525	1	7.72328e-07	0.000136073	0.00100865	2.30514e-05	1.73414e-05	2.66621e-06	7.78914e-07	2.2707e-06	3.91517e-06		51.5749
		0.00213274	0.00216988	0.000217121	0.000874649	1	3.46117e-06	0.000120406	0.000742051	1.11307e-05	1.93118e-05	2.71248e-06	3.96223e-06	4.49901e-06	6.62547e-06		51.5726
		0.00180934	0.00198135	0.000246703	0.000833948	1	4.36026e-07	0.000457305	0.000716876	2.11678e-05	1.73832e-05	7.92714e-06	6.12459e-06	3.75893e-06	4.64566e-06		51.5704
		0.0018595	0.00197044	0.000258411	0.000820544	1	6.50754e-07	0.000112787	0.000860881	1.44584e-05	1.65183e-05	5.26865e-06	3.05927e-06	4.81164e-06	5.11929e-06		51.5681
		0.00191985	0.00192109	0.000290206	0.000909541	1	1.12091e-06	0.000125812	0.000884717	2.03855e-05	2.03808e-05	1.34023e-06	5.55109e-06	4.38049e-06	3.32495e-06		51.5659
		0.00208429	0.00278785	0.000321894	0.000833961	1	5.63955e-07	0.000128646	0.000822642	1.34682e-05	1.97036e-05	2.71804e-06	3.17629e-06	5.23944e-06	4.81866e-06		51.5636
		0.00205337	0.00200748	0.000425433	0.000768241	1	1.85476e-06	0.000148126	0.000695726	1.55319e-05	1.71982e-05	4.23597e-06	4.92965e-06	3.7819e-06	3.44483e-06		51.5613
		0.00188247	0.00187901	0.000432689	0.000860534	1	1.08585e-06	0.000164328	0.000665805	3.16928e-05	2.1277e-05	3.96066e-06	6.1457e-06	4.59714e-06	5.14194e-06		51.5591
		0.00206162	0.00205968	0.000526328	0.000904615	1	4.61637e-07	0.000182326	0.000912338	1.61102e-05	1.83144e-05	1.36985e-06	3.24213e-06	4.22849e-06	7.28345e-06		51.5568
		0.00200352	0.00208881	0.000554458	0.00100668	1	1.71624e-06	0.0001798	0.000734981	1.29635e-05	1.59826e-05	1.37023e-06	6.48617e-06	4.22969e-06	6.44063e-06		51.5546
		0.00198692	0.00198812	0.000655316	0.00087666	1	1.14402e-06	0.000191301	0.000709535	1.53004e-05	1.88264e-05	1.36787e-06	2.42802e-06	3.97397e-06	6.93555e-06		51.5523
		#VALUE!	0.00198726	0.000635119	0.000946296	1	1.2357e-06	0.000221746	0.000974141	1.81211e-05	1.51449e-05	2.72152e-06	3.97543e-06	6.46651e-06	4.99052e-06		51.55
		0.00196941	0.002036	0.000712696	0.000971952	1	1.36871e-06	0.000237232	0.000817072	1.69952e-05	1.77588e-05	6.42905e-06	5.96559e-06	4.00466e-06	3.90347e-06		51.5478
		0.0021595	0.00202801	0.000976129	0.000936546	1	1.931e-06	0.000390378	0.000886415	2.25084e-05	1.76919e-05	6.55747e-06	4.56355e-06	5.83564e-06	7.15169e-06		51.5455
		0.00218803	0.00221918	0.000824881	0.000910322	1	2.20667e-06	0.000356665	0.000950871	2.16349e-05	1.58583e-05	5.39017e-06	4.69479e-06	5.1628e-06	6.8681e-06		51.5433
		0.00213906	0.00206482	0.000942952	0.000948348	1	2.69533e-06	0.000318	0.00111789	1.49078e-05	1.97981e-05	5.72678e-06	4.98797e-06	6.37836e-06	6.25744e-06		51.541
		0.00191039	0.00206693	0.00101242	0.00097891	1	1.47482e-06	0.000321836	0.00100358	2.35366e-05	1.71116e-05	9.02101e-06	5.22419e-06	1.74162e-05	8.26193e-06		51.5387
		0.00203868	0.00197967	0.00112276	0.000939374	1	1.19968e-06	0.000319896	0.000953438	1.53426e-05	1.46179e-05	-3.30275e-08	5.40344e-06	6.98896e-06	5.97118e-06		51.5365
		0.00213682	0.00203948	0.00125766	0.000900338	1	1.86937e-06	0.000438699	0.00112178	1.56542e-05	1.50389e-05	1.14444e-05	4.96849e-06	6.86188e-06	5.88785e-06		51.5342
		0.00197363	0.00203246	0.00133384	0.000945355	1	1.70798e-06	0.000511225	0.00141458	1.91733e-05	1.8142e-05	5.55827e-06	5.64804e-06	6.68608e-06	6.74596e-06		51.532
		0.00199117	0.00205976	0.00147713	0.00096832	1	2.35979e-06	0.000558314	0.00117521	2.63888e-05	1.62167e-05	1.01142e-05	5.02055e-06	7.31908e-06	6.29831e-06		51.5297
		0.0020976	0.0018233	0.00150616	0.000896565	1	3.41452e-06	0.000571785	0.00109429	1.37008e-05	1.86107e-05	6.96443e-06	7.27023e-06	6.44579e-06	6.41701e-06		51.5274
		0.00201419	0.00189651	0.00188817	0.000922196	1	3.8006e-06	0.000536326	0.00130535	1.90665e-05	1.56229e-05	5.31015e-06	1.15632e-05	8.75425e-06	7.4088e-06		51.5252
		0.00210654	0.00198763	0.00175358	0.000894834	1	3.92826e-06	0.000617522	0.00134264	1.76547e-05	1.52703e-05	1.07057e-05	1.162e-05	8.67833e-06	7.76809e-06		51.5229
		0.00212794	0.00205993	0.00175442	0.000948601	1	3.16636e-06	0.000508991	0.00122372	1.70724e-05	1.64275e-05	5.16023e-06	4.49452e-06	6.89718e-06	8.60488e-06		51.5207
		0.00189364	0.00210024	0.00174962	0.000951243	1	1.30701e-05	0.000499228	0.00113757	1.89402e-05	1.63213e-05	6.35229e-06	5.89437e-06	8.3675e-06	7.84934e-06		51.5184
		0.00194049	0.00188894	0.00184209	0.000923846	1	2.32699e-06	0.000530785	0.00121819	1.41834e-05	1.71192e-05	7.76878e-06	9.00356e-06	8.29027e-06	8.46217e-06		51.5161
		0.00211529	0.00198268	0.0020088	0.000931865	1	2.45777e-06	0.000638506	0.00140455	2.16968e-05	1.58679e-05	3.90832e-06	6.06449e-06	6.86342e-06	6.02191e-06		51.5139
		0.00208142	0.00214348	0.00214454	0.000856998	1	2.5368e-06	0.000636554	0.00136701	2.21919e-05	1.86905e-05	6.46527e-06	8.99899e-06	8.86171e-06	9.08315e-06		51.5116
		0.00192795	0.00202685	0.0022412	0.000941049	1	3.64612e-06	0.000683817	0.0013702	1.97287e-05	1.75296e-05	8.93879e-06	1.18328e-05	9.30671e-06	1.31202e-05		51.5093
		0.00199217	0.00207915	0.00235078	0.000844155	1	3.66168e-06	0.000745001	0.00149447	2.84739e-05	1.60399e-05	7.69002e-06	6.68412e-06	8.6623e-06	9.46007e-06		51.5071
		0.00217609	0.0020092	0.0024421	0.000867577	1	3.15323e-06	0.00072611	0.00163742	9.3391e-06	2.00887e-05	6.65291e-06	4.62997e-06	9.82976e-06	9.34678e-06		51.5048
		0.00198274	0.00196383	0.00230827	0.00093257	1	4.09192e-06	0.000764935	0.00143215	1.62533e-05	1.60055e-05	5.13144e-06	8.19413e-06	8.23092e-06	8.24631e-06		51.5026
		0.00233905	0.00210674	0.00237719	0.000895169	1	6.67117e-06	0.000762309	0.00156491	2.37901e-05	1.84125e-05	7.16616e-06	7.48082e-06	8.54635e-06	9.89457e-06		51.5003
		0.0020289	0.00197134	0.00255009	0.000837009	1	4.12143e-06	0.000820833	0.00164647	2.41704e-05	1.9008e-05	1.22994e-05	1.18623e-05	6.43145e-06	9.74327e-06		51.498
		0.00202295	0.00199428	0.00234468	0.000945152	1	3.49258e-06	0.000727901	0.00150425	1.49317e-05	1.80577e-05	5.17513e-06	5.25872e-06	8.07034e-06	7.37699e-06		51.4958
		0.00188467	0.00205968	0.00239628	0.000870306	1	4.49271e-06	0.00154361	0.00162853	1.81745e-05	1.89911e-05	8.25714e-06	7.17705e-06	7.34242e-06	9.16035e-06		51.4935
		0.00213149	0.00218622	0.00230581	0.000894572	1	5.31507e-06	0.00120441	0.00184806	2.06426e-05	1.96583e-05	4.14014e-06	8.83341e-06	8.37995e-06	8.72228e-06		51.4913
		0.00216492	0.00228924	0.00262238	0.000959499	1	4.65472e-06	0.000841976	0.00191787	1.96327e-05	1.93095e-05	1.14184e-05	6.6096e-06	1.14125e-05	1.15574e-05		51.489
		0.00210743	0.00206242	0.00487845	0.000922241	1	4.56951e-06	0.000744906	0.00151348	1.26524e-05	1.77922e-05	9.56486e-06	8.70459e-06	8.74367e-06	7.77038e-06		51.4868
		0.0021135	0.00200649	0.0023484	0.000932985	1	4.25478e-06	0.00079988	0.00139363	2.04342e-05	1.87546e-05	9.6084e-06	1.11292e-05	7.80722e-06	9.297e-06		51.4845
		0.00203718	0.00204202	0.0023446	0.000976852	1	4.89662e-06	0.000803364	0.0015317	1.91111e-05	1.76297e-05	1.06783e-05	8.49935e-06	1.07915e-05	7.58716e-06		51.4822
		0.00198106	0.00206986	0.00228252	0.000931919	1	2.86532e-06	0.000721024	0.00161295	1.64311e-05	1.88527e-05	1.30176e-05	1.28026e-05	1.12116e-05	8.33654e-06		51.48
		0.00203978	0.00197286	0.00254025	0.000986728	1	4.10103e-06	0.000728979	0.00148147	2.09921e-05	1.9263e-05	6.78404e-06	1.18035e-05	6.88272e-06	9.03893e-06		51.4777
		0.00197508	0.00201325	0.00191123	0.000938947	1	2.43967e-06	0.000724413	0.0014692	1.93433e-05	2.009e-05	6.48749e-06	6.77235e-06	8.77665e-06	6.91853e-06		51.4755
		0.00212851	0.00203733	0.00189435	0.00105292	1	5.70937e-06	0.00073802	0.00116675	2.00312e-05	2.24622e-05	1.16783e-05	8.25954e-06	8.98826e-06	8.15563e-06		51.4732
		0.00197891	0.00207304	0.00184452	0.000908075	1	2.57217e-06	0.000694689	0.00156037	2.6196e-05	2.28308e-05	7.87311e-06	9.88487e-06	6.88421e-06	7.4664e-06		51.4709
		0.00188826	0.00190321	0.00176097	0.00095498	1	3.76908e-06	0.000728088	0.00141414	2.12728e-05	1.9926e-05	6.40791e-06	7.43257e-06	6.61522e-06	9.00258e-06		51.4687
		0.00188797	0.00201006	0.00200276	0.000909032	1	2.71472e-06	0.000736333	0.00134306	1.23188e-05	2.0399e-05	7.97766e-06	6.16363e-06	8.63146e-06	8.5291e-06		51.4664
		0.00200573	0.00211853	0.00196412	0.000892991	1	3.72667e-06	0.000664511	0.00142932	1.51536e-05	2.06904e-05	5.522e-06	3.20638e-06	7.25767e-06	7.37022e-06		51.4641
		0.00217482	0.00208699	0.00185591	0.000969012	1	3.97985e-06	0.000607928	0.00152779	1.99657e-05	1.77916e-05	9.75696e-06	9.68668e-06	1.04064e-05	1.39844e-05		51.4619
		0.0019937	0.00195481	0.00176816	0.000882065	1	4.33978e-06	0.00137342	0.00110042	1.85886e-05	1.67311e-05	6.47933e-06	6.76383e-06	8.65023e-06	8.00632e-06		51.4596
		0.00199638	0.00200073	0.0016603	0.000901197	1	2.93698e-06	0.000681844	0.00133019	1.68421e-05	1.75267e-05	-3.3026e-08	8.49097e-06	6.98866e-06	9.18863e-06		51.4574
		0.00197671	0.00192279	0.00155481	0.000880024	1	2.74793e-06	0.000525733	0.00141389	1.77742e-05	1.55465e-05	6.72374e-06	4.67926e-06	7.77927e-06	1.17224e-05		51.4551
		0.00201565	0.00199632	0.0013952	0.000919232	1	3.01703e-06	0.000529981	0.00145336	8.05566e-06	1.93233e-05	2.7141e-06	7.92943e-06	8.5181e-06	8.94323e-06		51.4528
		0.00193802	0.00199539	0.00129414	0.00098105	1	1.66494e-06	0.00050523	0.0011387	1.32257e-05	1.65011e-05	6.3586e-06	8.85052e-06	7.69646e-06	7.85714e-06		51.4506
		0.0019013	0.0020048	0.00128908	0.000951096	1	3.33458e-06	0.000488688	0.001232	1.29491e-05	1.59812e-05	1.18746e-05	6.1078e-06	6.91244e-06	1.09983e-05		51.4483
		0.00200637	0.00189269	0.00123842	0.000932827	1	2.46031e-06	0.000466599	0.00107333	7.70933e-06	1.58002e-05	5.22743e-06	4.55304e-06	7.33645e-06	8.2424e-06		51.4461
		0.00192815	0.00180468	0.0013522	0.000925354	1	2.04788e-06	0.000459886	0.00121047	1.81614e-05	1.48121e-05	1.58607e-05	8.40727e-06	7.38905e-06	5.91206e-06		51.4438
		0.00183808	0.00192022	0.00129561	0.000870268	1	3.20732e-06	0.000583854	0.00115639	1.28694e-05	1.45371e-05	2.59719e-06	9.86436e-06	6.63698e-06	9.82339e-06		51.4415
		0.00206694	0.00203947	0.0012493	0.000952572	1	2.15289e-06	0.000470128	0.0012547	1.9624e-05	2.58023e-05	6.58163e-06	6.10718e-06	6.0915e-06	9.72403e-06		51.4393
		0.00187747	0.00186082	0.00101472	0.000872889	1	2.58889e-06	0.00128487	0.000978229	1.26699e-05	1.53376e-05	3.64266e-06	8.47858e-06	5.7462e-06	7.96877e-06		51.437
		0.00187936	0.00192991	0.00101574	0.000941131	1	2.04924e-06	0.000558487	0.00131014	1.65609e-05	1.87556e-05	1.00425e-05	6.53986e-06	6.35591e-06	8.80148e-06		51.4348
		0.00178396	0.00195929	0.000972537	0.000843573	1	2.69688e-06	0.000378463	0.0010096	1.68427e-05	1.93953e-05	3.6543e-06	3.54389e-06	6.19973e-06	7.40325e-06		51.4325
		0.00173724	0.00181386	0.00095063	0.000871141	1	2.88131e-06	0.00036137	0.000997342	1.47e-05	1.64797e-05	1.09669e-05	9.16677e-06	7.03354e-06	7.80583e-06		51.4302
		0.00181278	0.00182112	0.00103311	0.000910549	1	6.9421e-06	0.000366334	0.000974565	1.98039e-05	1.99703e-05	1.06471e-05	6.16317e-06	7.9212e-06	8.36788e-06		51.428
		0.00186955	0.00179066	0.000836469	0.000898887	1	1.89888e-06	0.000328128	0.00103061	1.06425e-05	1.61699e-05	4.88186e-06	6.37815e-06	5.98119e-06	9.17477e-06		51.4257
		0.00172571	0.00176037	0.000765354	0.000808176	1	2.6715e-06	0.000291101	0.00284188	2.0778e-05	1.64096e-05	4.83669e-06	4.91481e-06	5.71032e-06	9.23625e-06		51.4235
		0.00191543	0.00186691	0.000780091	0.00087971	1	1.81016e-06	0.000328498	0.000781966	1.79365e-05	2.81936e-05	9.12375e-06	1.13227e-05	5.90719e-06	6.15347e-06		51.4212
		0.0018426	0.00193033	0.00072645	0.000792606	1	1.73084e-06	0.000282879	0.00117613	1.89643e-05	1.80894e-05	9.2676e-06	7.6673e-06	5.29425e-06	7.84852e-06		51.4189
		0.00182429	0.00181419	0.000729299	0.000886166	1	1.78259e-06	0.000282857	0.0010697	2.1066e-05	1.93308e-05	4.07115e-06	5.52746e-06	6.30093e-06	8.41235e-06		51.4167
		0.00192542	0.00189109	0.000641717	0.000878413	1	1.57048e-06	0.00022836	0.000724269	2.33976e-05	1.43785e-05	7.68214e-06	7.41923e-06	5.92007e-06	8.21315e-06		51.4144
		0.00184708	0.00184458	0.000648939	0.000826122	1	2.02825e-06	0.000220768	0.000912334	2.68146e-05	1.51736e-05	1.04614e-05	4.54174e-06	5.69158e-06	8.22194e-06		51.4121
		0.00187183	0.0018646	0.00065429	0.00093739	1	2.45589e-06	0.000237279	0.000769636	1.06394e-05	1.71155e-05	1.28017e-06	7.57489e-06	2.61755e-05	7.28028e-06		51.4099
		0.00184873	0.00183574	0.0007195	0.000788461	1	1.72179e-06	0.000248379	0.00087369	1.44184e-05	1.698e-05	9.21913e-06	1.06783e-05	6.5543e-06	8.12542e-06		51.4076
		0.00186707	0.00183566	0.000668808	0.000838485	1	1.22167e-06	0.000334669	0.000720417	1.33323e-05	1.86331e-05	-3.36327e-08	4.71641e-06	5.42787e-06	9.02971e-06		51.4054
		0.00179837	0.00176363	0.000698121	0.000750314	1	1.28641e-06	0.000192053	0.000710754	2.02494e-05	1.76556e-05	5.22876e-06	6.83137e-06	6.40621e-06	7.61164e-06		51.4031
		0.00170041	0.00174995	0.000591029	0.000758272	1	1.2309e-06	0.000172477	0.000716241	1.51412e-05	1.52832e-05	5.00312e-06	7.2629e-06	6.12976e-06	1.01597e-05		51.4008
		0.0017828	0.00194265	0.000609374	0.000752611	1	1.32906e-06	0.000178748	0.000828023	2.2445e-05	1.96323e-05	2.68421e-06	6.27361e-06	5.53531e-06	7.37366e-06		51.3986
		0.00182558	0.00185562	0.000623937	0.000765019	1	1.32821e-06	0.000178633	0.000788469	2.47153e-05	2.77061e-05	1.32447e-06	5.48582e-06	5.05062e-06	8.02229e-06		51.3963
		0.00179927	0.00184185	0.000653826	0.000862993	1	1.6278e-06	0.000181758	0.000850255	8.55959e-06	1.83136e-05	5.29736e-06	6.921e-06	6.13616e-06	7.23068e-06		51.3941
		0.00189235	0.00184083	0.00054267	0.00083268	1	2.04822e-06	0.000260579	0.000753843	1.22222e-05	2.14261e-05	2.61647e-06	4.58645e-06	4.22245e-06	6.55028e-06		51.3918
		0.00185372	0.00174472	0.000545524	0.000759214	1	1.5337e-06	0.000178938	0.00105137	1.69342e-05	1.65039e-05	6.69127e-06	3.10442e-06	6.19297e-06	8.59176e-06		51.3895
		0.00185578	0.0018588	0.000574012	0.000759161	1	1.91002e-06	0.000206855	0.000861801	1.56843e-05	1.74162e-05	5.18257e-06	6.01866e-06	6.34963e-06	7.54441e-06		51.3873
		0.00191708	0.00192806	0.000581475	0.000722968	1	1.0881e-06	0.000197231	0.000743836	1.67966e-05	1.63698e-05	1.301e-06	6.15847e-06	4.96112e-06	4.35052e-06		51.385
		0.00185893	0.00194752	0.000586526	0.000718662	1	1.54949e-06	0.00018577	0.000820115	8.7278e-06	1.6587e-05	8.11904e-06	7.05701e-06	5.29396e-06	8.35336e-06		51.3828
		0.00195679	0.00184962	0.000599253	0.00076091	1	1.69647e-06	0.000208787	0.000806316	1.67079e-05	1.79309e-05	4.13194e-06	6.41148e-06	6.14898e-06	9.03912e-06		51.3805
		0.0017248	0.00167208	0.000564764	0.000728598	1	1.28666e-06	0.000196499	0.000809163	1.87778e-05	2.36378e-05	3.9141e-06	8.35113e-06	5.00915e-06	7.45485e-06		51.3783
		0.00181535	0.00178703	0.000552904	0.000726552	1	7.58748e-07	0.000180012	0.000830871	1.52099e-05	1.58487e-05	5.27154e-06	4.59146e-06	5.51898e-06	7.99294e-06		51.376
		0.00168796	0.0018355	0.000523353	0.000692454	1	1.98431e-06	0.000175453	0.000818816	1.61584e-05	1.91969e-05	3.81809e-06	7.4057e-06	4.54532e-06	6.80896e-06		51.3737
		0.00180383	0.00185058	0.000526955	0.000658336	1	1.54788e-06	0.000194815	0.000881661	2.01353e-05	1.81329e-05	1.08253e-05	2.34978e-06	5.64909e-06	7.52834e-06		51.3715
		0.00184865	0.001828	0.000562699	0.000678652	1	9.82115e-07	0.00017862	0.000991468	1.9835e-05	1.69214e-05	5.31535e-06	4.62962e-06	5.68327e-06	8.54186e-06		51.3692
		0.00186201	0.00173163	0.000513662	0.00071926	1	1.40571e-06	0.00017944	0.00086967	1.81988e-05	1.95979e-05	1.29433e-06	6.12688e-06	5.7585e-06	5.2858e-06		51.367
		0.00182049	0.00176423	0.00053216	0.000701015	1	1.29337e-06	0.000196523	0.000798186	2.18422e-05	1.58897e-05	-3.26516e-08	3.05253e-06	5.38665e-06	8.60722e-06		51.3647
		0.0018333	0.00177265	0.000505472	0.000691598	1	8.42959e-07	0.000182533	0.000823235	1.91396e-05	1.72362e-05	2.54851e-06	5.21185e-06	5.14121e-06	7.15608e-06		51.3624
		0.00187137	0.00184745	0.000529947	0.000736129	1	1.46433e-06	0.000182145	0.00102512	1.50816e-05	1.94418e-05	5.49576e-06	6.38236e-06	5.01905e-06	8.3329e-06		51.3602
		0.00185207	0.00174722	0.000531177	0.000652252	1	2.11562e-06	0.00019963	0.000951632	2.49004e-05	1.69651e-05	4.07075e-06	7.10614e-06	5.08845e-06	6.60128e-06		51.3579
		0.00186997	0.00189233	0.000581238	0.00073008	1	2.18837e-06	0.000196553	0.000772897	1.70265e-05	1.95406e-05	4.21073e-06	2.45006e-06	6.51695e-06	9.21148e-06		51.3556
		0.00199331	0.00195862	0.000543076	0.000753199	1	5.70826e-07	0.000176891	0.000960733	1.44134e-05	1.69136e-05	1.35838e-06	1.60746e-06	3.57639e-06	9.23287e-06		51.3534
		0.00176408	0.00194956	0.00054941	0.000707955	1	5.70321e-07	0.000173131	0.0009039	1.75218e-05	1.83231e-05	6.92347e-06	1.60603e-06	4.68235e-06	1.10661e-05		51.3511
		0.00168989	0.00171358	0.000565188	0.000768928	1	1.19156e-06	0.000153545	0.000740833	2.1199e-05	1.75788e-05	1.29575e-06	6.1336e-06	6.35321e-06	1.12046e-05		51.3489
		0.00188146	0.00187138	0.000556403	0.000672032	1	2.81736e-06	0.000165808	0.000764646	1.66694e-05	1.7269e-05	2.73686e-06	7.19631e-06	4.66216e-06	8.18493e-06		51.3466
		0.00186544	0.00183488	0.000598148	0.000672711	1	1.66977e-06	0.000175226	0.0012336	1.72114e-05	1.59871e-05	5.43392e-06	4.73289e-06	4.59939e-06	6.92385e-06		51.3443
		0.00187476	0.00185037	0.000737942	0.000681081	1	1.64562e-06	0.000164595	0.000680286	1.97883e-05	1.74314e-05	5.73656e-06	5.82921e-06	3.83317e-06	6.61523e-06		51.3421
		0.00170946	0.00179793	0.000507505	0.000631956	1	1.28691e-06	0.000161434	0.000839568	1.2141e-05	1.64838e-05	5.23078e-06	4.55596e-06	4.89359e-06	9.03907e-06		51.3398
		0.00186887	0.00175448	0.000493228	0.000637057	1	8.90821e-07	0.000159634	0.00069761	1.56389e-05	1.97854e-05	6.78367e-06	4.72097e-06	4.1048e-06	7.72637e-06		51.3376
		0.00188677	0.00176557	0.000489947	0.000662835	1	1.82039e-06	0.000150951	0.000755095	2.62146e-05	1.77735e-05	1.11446e-05	5.64467e-06	9.03404e-06	7.75036e-06		51.3353
		0.00189568	0.0017987	0.000441843	0.000682902	1	8.13576e-07	0.000141044	0.000735671	2.18904e-05	1.6812e-05	5.65247e-06	6.56436e-06	4.91031e-06	6.51827e-06		51.333
		0.00179956	0.00178003	0.000388657	0.000726358	1	1.99412e-06	0.000128859	0.000813704	1.33219e-05	1.60931e-05	-3.36063e-08	3.92721e-06	4.45925e-06	6.89433e-06		51.3308
		0.0018518	0.00177851	0.000355958	0.00077215	1	7.64942e-07	0.000150325	0.000829971	1.30851e-05	1.76888e-05	3.97758e-06	7.71504e-06	4.97199e-06	7.57577e-06		51.3285
		0.0018124	0.00186466	0.000383263	0.00065865	1	7.80826e-07	0.000152564	0.000800153	1.56525e-05	1.58733e-05	4.06017e-06	5.51255e-06	4.22922e-06	7.07652e-06		51.3263
		0.00182341	0.00182572	0.000372249	0.000735257	1	1.00975e-06	0.000152799	0.000782348	1.73095e-05	1.71335e-05	4.09008e-06	6.34652e-06	5.47788e-06	1.02705e-05		51.324
		0.00179831	0.00187221	0.000339681	0.000656565	1	2.30703e-06	0.000156735	0.000885971	1.89831e-05	1.95502e-05	1.20257e-06	9.25058e-06	5.56868e-06	7.28393e-06		51.3217
		0.00183228	0.00184053	0.000400348	0.000798164	1	1.06589e-06	0.000492625	0.000878834	2.30487e-05	1.74569e-05	5.19468e-06	2.26218e-06	4.16544e-06	7.71922e-06		51.3195
		0.00185095	0.00201596	0.000359126	0.000736679	1	1.36503e-06	0.00012825	0.000674175	2.41765e-05	1.42482e-05	3.83426e-06	5.20582e-06	5.47769e-06	5.44281e-06		51.3172
		0.00186208	0.00188542	0.000346768	0.000708831	1	1.40066e-06	0.000124908	0.000927345	1.29429e-05	1.7158e-05	1.18689e-05	3.81548e-06	4.09815e-06	5.42585e-06		51.315
		0.00185116	0.00181461	0.000301294	0.000629851	1	1.38908e-06	0.000107514	0.000716196	1.94544e-05	1.79393e-05	5.21335e-06	7.5681e-06	4.76114e-06	4.90785e-06		51.3127
		0.00184602	0.00182803	0.000313396	0.000681143	1	1.79011e-06	0.000148587	0.00082149	8.82648e-06	1.69503e-05	6.83661e-06	3.96479e-06	4.01514e-06	7.78667e-06		51.3104
		0.00187098	0.00196006	0.000318524	0.000737562	1	7.71917e-07	0.0015493	0.000783271	2.1526e-05	2.04401e-05	1.31574e-06	3.11408e-06	5.73426e-06	6.1845e-06		51.3082
		0.00189779	0.00180929	0.000301223	0.000654206	1	1.18366e-06	0.000162055	0.000637337	1.29175e-05	1.83912e-05	1.28715e-06	5.33124e-06	5.72656e-06	8.27248e-06		51.3059
		0.00190011	0.00179575	0.000299462	0.000656607	1	1.81577e-06	0.000104463	0.000633611	1.2842e-05	1.69403e-05	7.84001e-06	5.30007e-06	4.1824e-06	5.54135e-06		51.3037
		0.00189446	0.0018659	0.000336471	0.000654935	1	2.07275e-06	0.000110905	0.000708957	2.06371e-05	1.62783e-05	3.98827e-06	3.86777e-06	3.44205e-06	4.85537e-06		51.3014
		0.0017992	0.00184182	0.00032387	0.000687951	1	1.94489e-06	0.000121393	0.000740219	1.00157e-05	2.09626e-05	2.62213e-06	5.36241e-06	5.40729e-06	4.96793e-06		51.2991
		0.00196748	0.00198745	0.000362537	0.000733329	1	1.12337e-06	0.000113795	0.000696728	2.04302e-05	2.21005e-05	5.47486e-06	3.97374e-06	4.63404e-06	5.81654e-06		51.2969
		0.00186502	0.00190765	0.000314262	0.000728636	1	9.8535e-07	0.000107672	0.000724905	2.21572e-05	2.20425e-05	8.01592e-06	3.87067e-06	5.22673e-06	3.56844e-06		51.2946
		0.0018005	0.00199057	0.000280121	0.000689788	1	2.28997e-06	9.30295e-05	0.000785834	1.91301e-05	1.90194e-05	1.30711e-06	4.64051e-06	4.50961e-06	5.01564e-06		51.2924
		0.0019689	0.00187065	0.000292405	0.0006654	1	2.1742e-06	9.97632e-05	0.000583753	1.45742e-05	1.88732e-05	1.30294e-06	5.39664e-06	4.37692e-06	3.07178e-06		51.2901
		0.00193976	0.00199324	0.000304404	0.000662769	1	2.476e-06	0.000111629	0.000803187	1.9746e-05	2.06942e-05	5.4994e-06	7.98334e-06	4.40978e-06	3.34719e-06		51.2878
		0.00194973	0.00183394	0.000301891	0.000639173	1	2.59163e-06	0.000123828	0.000862325	1.5227e-05	2.07089e-05	-3.27786e-08	3.83048e-06	5.40761e-06	4.80856e-06		51.2856
		0.0019126	0.00190519	0.000490064	0.000580935	1	2.28071e-06	0.000127952	0.000721298	2.27955e-05	1.89425e-05	3.9714e-06	8.47341e-06	4.49139e-06	6.60072e-06		51.2833
		0.00192885	0.00195896	0.00036406	0.000637872	1	2.52023e-06	0.000124978	0.000631454	2.08884e-05	1.91715e-05	-3.47671e-08	7.31333e-06	3.86505e-06	3.74562e-06		51.2811
		0.00181319	0.00173419	0.000370546	0.000627648	1	2.74796e-06	0.000123272	0.00080109	2.24603e-05	2.06966e-05	2.78046e-06	6.49856e-06	5.60911e-06	3.40587e-06		51.2788
		0.00187197	0.00182359	0.000362827	0.000582401	1	2.61041e-06	0.000125934	0.000753924	2.53915e-05	1.79245e-05	-3.44485e-08	4.02562e-06	5.55953e-06	3.87907e-06		51.2765
		0.00176299	0.00188444	0.000419518	0.0005927	1	2.01722e-06	0.000122353	0.000799394	2.27413e-05	2.01559e-05	5.47343e-06	7.94564e-06	3.77928e-06	3.00024e-06		51.2743
		0.00190567	0.00197229	0.000433895	0.000677472	1	2.25925e-06	0.000126068	0.000730769	1.67586e-05	2.05476e-05	2.88605e-06	8.43179e-06	5.3045e-06	4.0623e-06		51.272
		0.00183153	0.00178582	0.00043622	0.0006	1	2.03207e-06	0.00164083	0.000793212	1.28628e-05	1.8145e-05	1.2817e-06	6.06708e-06	3.72364e-06	4.60204e-06		51.2698
		0.00191115	0.00179894	0.000455087	0.000587621	1	1.58998e-06	0.000149683	0.000736663	1.67365e-05	1.81793e-05	3.63125e-06	1.40859e-06	3.67434e-06	3.54009e-06		51.2675
		0.0021421	0.00174778	0.000467664	0.000721024	1	1.67094e-06	0.000113981	0.000693103	2.83785e-05	1.92692e-05	7.66425e-06	3.70086e-06	4.77022e-06	3.10343e-06		51.2652
		0.00191848	0.00187432	0.000447075	0.000674628	1	1.51394e-06	0.0001152	0.00075517	1.56052e-05	1.86189e-05	4.92682e-06	1.43036e-06	3.07261e-06	2.55159e-06		51.263
		0.00187224	0.00196054	0.000493222	0.000680735	1	2.27038e-06	0.000319657	0.000824928	1.15154e-05	1.81765e-05	5.28229e-06	4.60082e-06	4.00033e-06	2.09659e-06		51.2607
		0.00191108	0.00188581	0.000503092	0.000663198	1	1.34625e-06	0.000123749	0.000672203	2.74079e-05	1.90942e-05	1.23958e-06	3.66726e-06	3.71383e-06	3.99227e-06		51.2585
		0.00185235	0.00180639	0.00052353	0.000650152	1	1.6122e-06	0.000143023	0.000896319	1.41946e-05	1.97008e-05	4.91965e-06	4.99911e-06	3.83531e-06	4.3337e-06		51.2562
		0.00191091	0.00187424	0.000559608	0.000623756	1	1.56084e-06	0.000124266	0.00117772	1.5758e-05	1.85364e-05	4.76293e-06	6.91423e-06	3.92535e-06	4.19564e-06		51.2539
		0.00189794	0.00192271	0.000579581	0.000668419	1	2.06597e-06	0.000459536	0.000831874	1.17132e-05	1.60654e-05	1.23808e-06	2.19764e-06	3.48448e-06	4.75076e-06		51.2517
		0.00184566	0.0019015	0.000514393	0.000691873	1	1.95683e-06	0.000110145	0.000742023	1.5225e-05	1.58536e-05	6.29631e-06	6.57277e-06	2.80127e-06	5.6492e-06		51.2494
		0.00186892	0.00181773	0.000501637	0.000575344	1	2.3216e-06	0.000150228	0.000763206	2.04947e-05	2.08652e-05	2.45098e-06	7.16071e-06	4.17517e-06	3.44991e-06		51.2471
		0.00186834	0.00185046	0.000476272	0.000624018	1	2.77077e-06	0.000193533	0.000602136	2.08424e-05	1.75038e-05	6.27827e-06	4.36925e-06	4.02249e-06	3.50844e-06		51.2449
		0.00186364	0.00203128	0.000469322	0.000653452	1	2.26198e-06	0.000168831	0.000799123	1.80392e-05	1.85819e-05	2.49635e-06	5.10518e-06	4.36439e-06	5.18559e-06		51.2426
		0.00194208	0.00162398	0.00163559	0.000609326	1	2.36571e-06	0.000124252	0.000766258	2.13748e-05	1.98344e-05	7.24115e-06	6.29396e-06	3.219e-06	4.68085e-06		51.2404
		0.00186215	0.00175035	0.000534932	0.000611358	1	2.07675e-06	0.00010928	0.000726219	1.82143e-05	1.65575e-05	3.79664e-06	2.94556e-06	3.61568e-06	3.39443e-06		51.2381
		0.00181273	0.00197898	0.000567825	0.00065614	1	2.0165e-06	0.000112246	0.000783293	1.8874e-05	1.87394e-05	6.84782e-06	5.55986e-06	4.5093e-06	6.30957e-06		51.2358
		0.00201161	0.00189785	0.000454692	0.000608759	1	3.3843e-06	0.00011255	0.000821469	2.6028e-05	1.77358e-05	1.35312e-06	2.40185e-06	5.77428e-06	5.69275e-06		51.2336
		0.00205037	0.00176598	0.000428173	0.000790715	1	2.10526e-06	0.000109157	0.000759975	1.72875e-05	2.00241e-05	2.83836e-06	5.80459e-06	3.94424e-06	5.5504e-06		51.2313
		0.0019309	0.00181079	0.00040637	0.000617239	1	1.0679e-06	0.000110756	0.000877533	1.66759e-05	1.74692e-05	4.32564e-06	2.51692e-06	4.50574e-06	5.44094e-06		51.2291
		0.00199202	0.00191703	0.000408949	0.000651606	1	8.73319e-07	0.000111846	0.000772153	2.34978e-05	2.20506e-05	3.01485e-06	7.04639e-06	3.78402e-06	8.28194e-06		51.2268
		0.00166294	0.00168045	0.000339451	0.00063489	1	1.86161e-06	0.000102475	0.000750083	2.07093e-05	1.63352e-05	6.69264e-06	3.10506e-06	4.64538e-06	4.71059e-06		51.2245
		0.00170662	0.00200707	0.000349144	0.000626726	1	1.28899e-06	0.000115842	0.000712179	1.88119e-05	1.72694e-05	3.9212e-06	6.08446e-06	2.91732e-06	4.77371e-06		51.2223
		0.00200853	0.00185075	0.000352089	0.000679883	1	1.96711e-06	0.000121047	0.000887558	1.46472e-05	1.75931e-05	6.68009e-06	6.97341e-06	4.99341e-06	7.7699e-06		51.22
		0.00166643	0.00171911	0.000356173	0.000572243	1	1.68535e-06	0.000123872	0.000780853	1.77404e-05	1.74484e-05	3.84907e-06	2.98624e-06	5.26968e-06	7.48662e-06		51.2178
		0.00182128	0.0018475	0.000366779	0.000659253	1	2.07133e-06	0.000136772	0.000716168	1.53647e-05	1.92671e-05	8.00442e-06	7.73048e-06	5.21923e-06	8.87999e-06		51.2155
		0.00177931	0.00164386	0.000374606	0.000604269	1	1.30369e-06	0.000128053	0.000672168	1.48075e-05	1.80179e-05	6.12364e-06	4.26164e-06	3.48742e-06	9.19545e-06		51.2132
		0.00187479	0.00179434	0.000359682	0.000607338	1	1.50915e-06	0.000117458	0.00086721	1.22107e-05	1.75099e-05	9.23102e-06	8.40078e-06	4.3357e-06	7.18083e-06		51.211
		0.00180511	0.00175848	0.000343696	0.000581703	1	1.73178e-06	0.00014217	0.000725976	1.67383e-05	2.02261e-05	7.9433e-06	5.3699e-06	4.00204e-06	4.97487e-06		51.2087
		0.0016897	0.00168627	0.000345881	0.000624497	1	1.98123e-06	0.000113172	0.000869091	2.33187e-05	1.74451e-05	7.65623e-06	7.39383e-07	3.85741e-06	7.41483e-06		51.2065
		0.00178511	0.00163682	0.000322066	0.000598438	1	1.48704e-06	0.00011153	0.000779565	1.6419e-05	2.15097e-05	-3.21964e-08	8.27766e-06	3.46378e-06	7.0756e-06		51.2042
		0.0016163	0.00154879	0.000314327	0.000576242	1	1.73767e-06	0.000111309	0.000793945	2.42597e-05	1.86222e-05	6.24708e-06	4.34754e-06	4.89215e-06	8.62556e-06		51.2019
		0.00178723	0.00184969	0.00035266	0.000583056	1	1.09277e-06	0.00013967	0.000685444	2.66353e-05	2.48436e-05	3.9859e-06	5.41171e-06	4.50779e-06	8.07505e-06		51.1997
		0.00172041	0.00184688	0.000327335	0.000639776	1	2.01124e-06	0.000111511	0.000718146	1.88247e-05	2.1502e-05	2.71159e-06	2.37651e-06	3.52496e-06	9.76066e-06		51.1974
		0.0019365	0.00183803	0.000384271	0.000641594	1	1.63656e-06	0.000109325	0.000602339	1.80699e-05	1.81617e-05	8.57525e-06	4.14076e-06	4.95592e-06	7.78705e-06		51.1952
		0.00173234	0.00187797	0.000354933	0.000589047	1	1.8937e-06	0.000109388	0.000707978	2.18337e-05	2.29221e-05	2.70289e-06	4.73792e-06	3.51364e-06	8.74168e-06		51.1929
		0.00179432	0.00166728	0.000522333	0.000690723	1	1.34991e-06	0.000139883	0.000642743	2.4345e-05	2.07353e-05	4.10651e-06	7.16856e-06	4.15524e-06	9.14951e-06		51.1906
		0.001647	0.00170785	0.000434922	0.000615406	1	2.6801e-06	0.000133079	0.000631435	2.34456e-05	2.4492e-05	5.45764e-06	4.75355e-06	4.25472e-06	9.26597e-06		51.1884
		0.00179036	0.0017966	0.000427413	0.000693371	1	3.95139e-06	0.000132727	0.000862858	3.00257e-05	2.44049e-05	7.11251e-06	4.94982e-06	4.30378e-06	1.01644e-05		51.1861
		0.00179421	0.00178297	0.000399344	0.000602933	1	2.03672e-06	0.000134912	0.000673927	2.91427e-05	2.24863e-05	1.28463e-06	3.80053e-06	5.132e-06	9.20692e-06		51.1839
		0.00168747	0.0017004	0.000402498	0.000562929	1	2.97709e-06	0.000173291	0.000624184	1.87284e-05	2.62421e-05	8.80632e-06	3.64273e-06	4.35984e-06	1.15586e-05		51.1816
		0.00187378	0.00170512	0.000427376	0.000556329	1	4.61494e-06	0.000179435	0.000691707	2.61205e-05	2.55035e-05	1.31852e-06	3.12065e-06	5.38714e-06	9.93771e-06		51.1793
		0.00168828	0.0016164	0.000520582	0.000587507	1	3.45556e-06	0.000169404	0.000809314	2.78969e-05	2.82888e-05	6.60823e-06	5.36533e-06	5.41024e-06	9.92312e-06		51.1771
		0.00164464	0.00169545	0.000465272	0.000539861	1	2.29958e-05	0.000174357	0.00115513	2.02793e-05	2.3425e-05	2.70027e-06	7.10008e-06	4.35768e-06	9.22655e-06		51.1748
		0.00174767	0.00177376	0.00310982	0.000604552	1	2.54687e-06	0.000337312	0.000839731	2.71276e-05	2.79282e-05	2.9443e-06	8.60199e-06	5.41157e-06	1.25708e-05		51.1726
		0.00172442	0.00169154	0.000491322	0.000581723	1	4.45559e-06	0.000189283	0.000848359	2.24269e-05	2.61548e-05	4.18183e-06	8.11121e-06	5.2273e-06	1.30374e-05		51.1703
		0.00177733	0.00161224	0.000436733	0.000599662	1	3.10701e-06	0.000165206	0.000973777	2.17524e-05	2.7455e-05	6.33721e-06	5.14528e-06	4.51148e-06	1.15083e-05		51.168
		0.00180806	0.00176326	0.000519084	0.00059649	1	4.21047e-06	0.000193438	0.00088543	3.55111e-05	2.76355e-05	2.69255e-06	7.86647e-06	4.46595e-06	1.3136e-05		51.1658
		0.00184252	0.00186106	0.000486732	0.000663837	1	3.21177e-06	0.000202407	0.000962979	3.08985e-05	3.1365e-05	6.77641e-06	6.28792e-06	7.23695e-06	1.11588e-05		51.1635
		0.00186239	0.00177009	0.000498806	0.000610496	1	4.53588e-06	0.000243879	0.000954328	2.30433e-05	2.76589e-05	6.94124e-06	7.24602e-06	5.43575e-06	1.29409e-05		51.1613
		0.00173426	0.00178189	0.000504615	0.000624097	1	4.38169e-06	0.000195058	0.000863277	2.76798e-05	3.16982e-05	3.81902e-06	9.62985e-06	5.56962e-06	1.20607e-05		51.159
		0.00187359	0.0019108	0.0005032	0.00062442	1	3.62221e-06	0.000206628	0.000845948	2.83573e-05	2.84098e-05	6.7173e-06	3.1165e-06	5.73872e-06	1.34981e-05		51.1567
		0.0018015	0.00248814	0.000490332	0.000656676	1	3.86414e-06	0.000203439	0.000930529	2.62642e-05	2.5471e-05	6.39217e-06	5.18991e-06	6.82659e-06	1.36177e-05		51.1545
		0.0016881	0.00180559	0.000531592	0.000682754	1	4.2357e-06	0.000200311	0.000738506	2.81752e-05	2.46492e-05	6.03007e-06	5.59538e-06	5.90307e-06	9.92979e-06		51.1522
		0.00195892	0.00183728	0.000541879	0.000557773	1	2.86875e-06	0.000217488	0.000893703	3.11049e-05	2.79104e-05	7.8069e-06	5.27769e-06	5.78475e-06	7.08933e-06		51.15
		0.00195187	0.00192497	0.00054956	0.00058358	1	4.62318e-06	0.000221071	0.000806064	3.07526e-05	3.14811e-05	6.5817e-06	6.10724e-06	6.67744e-06	1.11565e-05		51.1477
		0.00162261	0.00166272	0.000469694	0.000558084	1	6.86535e-06	0.000208714	0.00101191	1.74097e-05	2.52965e-05	8.18624e-06	4.74076e-06	6.75562e-06	8.48563e-06		51.1454
		0.00182012	0.00183744	0.000483287	0.000567781	1	4.88797e-06	0.000379656	0.000905861	2.59415e-05	2.56218e-05	8.39126e-06	4.1653e-06	7.24453e-06	9.27703e-06		51.1432
		0.00178882	0.00176951	0.000438318	0.000501424	1	3.39841e-06	0.000160852	0.000775843	1.77186e-05	2.47507e-05	5.9426e-06	6.89286e-06	4.7595e-06	7.05577e-06		51.1409
		0.00172697	0.00189909	0.000385016	0.000603564	1	3.88773e-06	0.000145307	0.000796621	1.75054e-05	2.67492e-05	7.32826e-06	6.36968e-06	5.10421e-06	6.9497e-06		51.1386
		0.0016992	0.00161807	0.000369204	0.000517654	1	3.19104e-06	0.000384382	0.000724745	2.29806e-05	2.41137e-05	2.34941e-06	5.49112e-06	4.52886e-06	5.02341e-06		51.1364
		0.00187961	0.00182725	0.000395907	0.000556372	1	3.11191e-06	0.000147481	0.000865835	1.62384e-05	2.22632e-05	3.67339e-06	5.69994e-06	5.79467e-06	5.21445e-06		51.1341
		0.00185467	0.00188051	0.000348035	0.000558685	1	1.98494e-06	0.000150156	0.000855961	2.76818e-05	2.47095e-05	5.10309e-06	5.18551e-06	5.68372e-06	6.8111e-06		51.1319
		0.00188299	0.00186606	0.000290588	0.000521245	1	1.23885e-06	0.000137106	0.000699033	2.16318e-05	2.3814e-05	3.76867e-06	5.84778e-06	6.50597e-06	5.04502e-06		51.1296
		0.00188698	0.0018617	0.000302432	0.000595114	1	2.09953e-06	0.000158694	0.000756423	1.84141e-05	3.13619e-05	-3.18529e-08	3.72231e-06	4.79786e-06	5.60367e-06		51.1273
		0.00179532	0.00173672	0.000273518	0.000586123	1	2.34709e-06	0.000132811	0.000749958	2.49408e-05	1.98897e-05	7.49586e-06	5.79138e-06	5.77651e-06	5.14723e-06		51.1251
		0.00182505	0.00181682	0.000271598	0.000645729	1	2.90198e-06	0.000132949	0.000873671	2.03471e-05	2.23933e-05	7.89732e-06	6.10156e-06	3.39367e-06	7.3304e-06		51.1228
		0.00167513	0.00159035	0.000215312	0.000555338	1	1.68574e-06	0.00010856	0.000634976	1.96496e-05	1.94216e-05	4.57401e-06	5.97595e-06	4.07535e-06	4.85947e-06		51.1206
		0.00181785	0.00175888	0.000232262	0.000530724	1	1.73003e-06	0.000105308	0.000740167	2.4153e-05	2.13411e-05	4.96953e-06	5.0498e-06	4.87063e-06	4.37764e-06		51.1183
		0.00186493	0.00194288	0.000221198	0.00060727	1	1.77172e-06	0.000103167	0.000816858	1.4684e-05	2.03801e-05	5.08928e-06	8.12682e-06	4.8746e-06	4.17522e-06		51.1161
		0.00188683	0.00178435	0.000197132	0.000545251	1	1.34906e-06	7.96577e-05	0.00069556	2.74651e-05	2.37003e-05	1.24217e-06	5.87995e-06	6.65458e-06	4.4601e-06		51.1138
		0.00168058	0.00179711	0.000194213	0.000524693	1	1.38616e-06	9.15533e-05	0.000691758	1.59868e-05	2.21518e-05	4.8321e-06	6.31314e-06	4.62827e-06	5.86462e-06		51.1115
		0.00171867	0.0017095	0.000205733	0.000524771	1	2.51539e-06	8.58926e-05	0.000772689	1.89808e-05	2.48787e-05	4.7289e-06	7.55135e-06	5.4777e-06	3.4504e-06		51.1093
		0.00181306	0.0018976	0.000245949	0.000524162	1	1.91443e-06	8.28827e-05	0.000640578	1.83665e-05	2.09777e-05	1.2075e-06	5.00132e-06	4.71422e-06	2.99565e-06		51.107
		0.00169399	0.00174186	0.000227617	0.000613492	1	1.71476e-06	8.37552e-05	0.000692985	1.86751e-05	1.9681e-05	5.82314e-06	6.75429e-06	4.35283e-06	4.6616e-06		51.1047
		0.00175968	0.00164268	0.000225377	0.000613073	1	2.34637e-06	8.04699e-05	0.000822497	2.68253e-05	1.88869e-05	4.58727e-06	1.99767e-06	5.92692e-06	2.65325e-06		51.1025
		0.0018225	0.00179099	0.000260301	0.000545816	1	1.86794e-06	6.45622e-05	0.00091609	1.81985e-05	2.38066e-05	6.34332e-06	8.82926e-06	4.62875e-06	2.47162e-06		51.1002
		0.0018193	0.00185436	0.000221592	0.000560769	1	2.82148e-06	7.84366e-05	0.000716519	1.54592e-05	1.91399e-05	5.10821e-06	7.41547e-06	7.39681e-06	4.4998e-06		51.098
		0.00176099	0.00185721	0.000221544	0.000544932	1	1.76582e-06	7.28532e-05	0.000763614	1.93476e-05	1.7154e-05	4.03286e-06	2.34656e-06	4.3208e-06	4.09463e-06		51.0957
		0.00170394	0.00167667	0.000192943	0.00052124	1	4.34893e-06	8.40556e-05	0.000637195	1.60415e-05	1.62045e-05	2.51649e-06	8.8226e-06	4.28676e-06	4.15494e-06		51.0934
		0.00192712	0.00195907	0.000210674	0.000611419	1	1.46992e-06	8.7672e-05	0.000733555	1.55072e-05	2.283e-05	6.413e-06	4.46301e-06	4.45128e-06	3.11874e-06		51.0912
		0.00169911	0.00169034	0.000183092	0.000547311	1	8.14965e-07	9.11378e-05	0.000631039	1.92035e-05	1.65042e-05	2.46388e-06	2.15941e-06	4.19714e-06	3.76806e-06		51.0889
		0.00175126	0.00178633	0.000183598	0.000659553	1	1.48188e-06	7.52776e-05	0.000739526	1.6362e-05	1.81081e-05	5.16577e-06	3.7494e-06	4.02718e-06	3.30038e-06		51.0867
		0.00171239	0.00177803	0.000184061	0.000538405	1	1.75502e-06	7.94872e-05	0.000666055	1.69629e-05	1.70491e-05	1.31389e-06	0	3.45924e-06	2.28764e-06		51.0844
		0.00163921	0.00156811	0.000176027	0.000509936	1	1.55864e-06	7.48736e-05	0.000564861	1.82125e-05	1.74539e-05	1.24441e-06	2.20889e-06	4.2933e-06	4.6216e-06		51.0821
		0.00171635	0.00170812	0.000202891	0.000484318	1	1.60732e-06	7.38562e-05	0.000602909	1.6919e-05	1.97991e-05	3.67085e-06	3.55994e-06	4.37003e-06	3.5787e-06		51.0799
		0.00174955	0.00194139	0.000191162	0.000557614	1	8.55741e-07	5.59392e-05	0.000843245	1.57575e-05	1.79167e-05	6.51653e-06	3.02335e-06	3.47918e-06	3.32658e-06		51.0776
		0.00162516	0.00151402	0.000177726	0.000517074	1	8.47821e-07	6.61285e-05	0.000634113	1.2701e-05	1.74187e-05	2.56321e-06	1.49764e-06	4.25143e-06	2.20354e-06		51.0754
		0.00168241	0.00161881	0.000152022	0.000437949	1	1.2583e-06	7.08047e-05	0.000710006	2.77436e-05	1.95752e-05	3.82782e-06	4.45467e-06	3.87325e-06	2.3394e-06		51.0731
		0.00173316	0.00180308	0.000174262	0.000487611	1	1.40935e-06	5.82523e-05	0.000673129	1.60076e-05	1.70091e-05	5.28942e-06	2.30344e-06	3.29874e-06	2.89938e-06		51.0708
		0.00158108	0.00157543	0.000169902	0.000594923	1	1.22972e-06	6.2726e-05	0.00066498	1.44215e-05	1.51076e-05	2.48357e-06	5.80466e-06	3.11719e-06	3.49578e-06		51.0686
		0.00179136	0.00176248	0.000201724	0.000616505	1	1.227e-06	7.35316e-05	0.000802171	1.41577e-05	1.91521e-05	9.54294e-06	4.73698e-06	4.72453e-06	2.81665e-06		51.0663
		0.0016982	0.00169766	0.000191029	0.000549025	1	1.14386e-06	6.15767e-05	0.000593926	1.82046e-05	1.89972e-05	3.79461e-06	5.88805e-06	3.9526e-06	2.6258e-06		51.0641
		0.00161435	0.00180823	0.000196706	0.00057962	1	1.38797e-06	6.08784e-05	0.000760799	2.67875e-05	1.98537e-05	2.58834e-06	4.53714e-06	3.82892e-06	4.27357e-06		51.0618
		0.00179581	0.00165769	0.000175187	0.000608584	1	6.46115e-07	8.03232e-05	0.000612783	1.65689e-05	1.80845e-05	3.91509e-06	3.03746e-06	2.33017e-06	3.18388e-06		51.0595
		0.00169749	0.00181056	0.000195217	0.00054415	1	1.22476e-06	7.413e-05	0.000730089	2.0258e-05	1.89425e-05	2.69743e-06	6.30451e-06	3.50655e-06	3.63258e-06		51.0573
		0.00172715	0.0016984	0.000187587	0.000560216	1	1.92254e-06	8.06632e-05	0.000588463	1.28437e-05	1.96298e-05	2.59201e-06	1.51447e-06	2.0913e-06	3.33282e-06		51.055
		0.0015259	0.00149823	0.000179697	0.000551076	1	8.05337e-07	6.16257e-05	0.000623584	1.48294e-05	1.3628e-05	4.9001e-06	2.84527e-06	3.7109e-06	3.42709e-06		51.0528
		0.00168396	0.00174225	0.000161549	0.000517664	1	7.45556e-07	5.56502e-05	0.000576842	1.71375e-05	1.79909e-05	1.27081e-06	1.50383e-06	2.30736e-06	3.3094e-06		51.0505
		0.00157883	0.00158736	0.000143225	0.000453954	1	1.71935e-06	5.45294e-05	0.000614603	2.2539e-05	2.10102e-05	2.60695e-06	3.04648e-06	3.0383e-06	1.76507e-06		51.0482
		0.00172996	0.00175111	0.000132935	0.000479804	1	2.03765e-06	5.51518e-05	0.000681806	1.2898e-05	1.6677e-05	3.92072e-06	3.80226e-06	3.26705e-06	3.34691e-06		51.046
		0.00174044	0.00172685	0.000141373	0.000479831	1	2.18022e-06	5.60672e-05	0.000739307	1.83706e-05	1.75539e-05	8.00494e-06	3.86537e-06	2.6095e-06	2.91919e-06		51.0437
		0.00162161	0.00159223	0.000159284	0.000450818	1	1.68219e-06	7.77065e-05	0.000680838	1.1162e-05	1.6987e-05	2.7201e-06	5.56276e-06	3.77991e-06	2.33841e-06		51.0414
		0.00156035	0.00141185	0.000153168	0.00050548	1	7.76662e-07	6.01532e-05	0.000733488	2.0136e-05	1.73518e-05	-3.35147e-08	6.26652e-06	3.1248e-06	3.28425e-06		51.0392
		0.00168085	0.00158033	0.000154623	0.000474253	1	1.29073e-06	6.39992e-05	0.000660057	1.95773e-05	1.82215e-05	1.2871e-06	2.28466e-06	3.62244e-06	4.46272e-06		51.0369
		0.00161158	0.00177655	0.000165824	0.000488837	1	1.30461e-06	7.02639e-05	0.000713142	1.75438e-05	1.66251e-05	2.63482e-06	2.30923e-06	3.77954e-06	4.51072e-06		51.0347
		0.00165083	0.00157904	0.00018779	0.00048537	1	1.72541e-06	7.87143e-05	0.000708085	1.74194e-05	1.85411e-05	3.94056e-06	1.52857e-06	1.64168e-06	3.5231e-06		51.0324
		0.00159396	0.00157739	0.000177559	0.000471222	1	1.50031e-06	7.18397e-05	0.00065045	1.73033e-05	1.98489e-05	2.59869e-06	5.31447e-06	5.12592e-06	3.49961e-06		51.0301
		0.00155313	0.00162295	0.000171545	0.000452192	1	1.56814e-06	8.1941e-05	0.000760075	1.76035e-05	2.04358e-05	1.252e-06	5.18562e-06	4.09208e-06	3.56914e-06		51.0279
		0.00158857	0.00154326	0.000180289	0.000460349	1	1.22068e-06	8.47582e-05	0.000559703	2.13146e-05	1.91498e-05	4.96159e-06	6.48232e-06	3.0943e-06	2.11939e-06		51.0256
		0.00156661	0.00152736	0.00016703	0.000427446	1	1.203e-06	6.71655e-05	0.000791895	2.44549e-05	1.34418e-05	4.88971e-06	2.83924e-06	3.5941e-06	3.41983e-06		51.0234
		0.00154672	0.00169744	0.00015414	0.00048941	1	3.12894e-06	6.98943e-05	0.000816135	2.11719e-05	1.50097e-05	1.2941e-06	3.82854e-06	3.75966e-06	3.21049e-06		51.0211
		0.00149982	0.00159892	0.000155275	0.000416592	1	1.72649e-06	6.79626e-05	0.000586702	2.26327e-05	1.88072e-05	2.61778e-06	6.11835e-06	3.28565e-06	3.2066e-06		51.0189
		0.00160136	0.00155131	0.000169283	0.000436746	1	1.61797e-06	6.12512e-05	0.000654848	1.14785e-05	1.77792e-05	-3.27033e-08	3.05736e-06	4.45672e-06	3.52327e-06		51.0166
		0.00150609	0.00159411	0.000147192	0.000444782	1	1.1479e-06	5.61715e-05	0.000706333	1.75512e-05	1.76718e-05	1.24827e-06	3.69297e-06	3.51317e-06	2.63508e-06		51.0143
		0.00149458	0.00152514	0.000159565	0.000397321	1	1.66546e-06	6.18601e-05	0.000683481	1.60972e-05	1.70788e-05	6.36056e-06	2.21318e-06	4.18844e-06	2.78577e-06		51.0121
		0.00157329	0.00160108	0.00016275	0.000433691	1	1.79777e-06	6.67414e-05	0.000620772	1.95792e-05	1.99268e-05	1.19675e-06	2.83244e-06	4.02018e-06	4.29701e-06		51.0098
		0.00149514	0.00153498	0.000173115	0.00041422	1	1.01015e-06	6.69592e-05	0.000590928	1.8371e-05	1.82876e-05	1.20779e-06	2.85859e-06	4.60569e-06	3.59205e-06		51.0076
		0.00159078	0.00152739	0.000162914	0.000421405	1	1.79441e-06	6.78827e-05	0.000857128	3.95967e-05	1.99772e-05	-3.20145e-08	3.7412e-06	3.78871e-06	2.6695e-06		51.0053
		0.00150553	0.00149259	0.00237442	0.000354039	1	1.38621e-06	6.20633e-05	0.000677115	1.20755e-05	2.05824e-05	3.89374e-06	3.7761e-06	3.47636e-06	4.11076e-06		51.003
		0.00158103	0.00155752	0.000196585	0.000454987	1	3.539e-06	7.23824e-05	0.00079759	1.40768e-05	1.76501e-05	2.68692e-06	7.06497e-06	4.33614e-06	3.29129e-06		51.0008
		0.0016746	0.00165013	0.000163995	0.000411832	1	1.27655e-06	6.31565e-05	0.000832811	2.74141e-05	1.76873e-05	1.27297e-06	7.53189e-07	4.8542e-06	1.74558e-06		50.9985
		0.00159537	0.00147474	0.000155925	0.000365189	1	1.78975e-06	6.04191e-05	0.000596944	1.46966e-05	1.92904e-05	6.07778e-06	2.11479e-06	3.89404e-06	3.54329e-06		50.9963
		0.00153708	0.00157894	0.000147441	0.000395917	1	7.09963e-07	6.58919e-05	0.000691886	1.56235e-05	1.80055e-05	2.45092e-06	7.16017e-07	3.62563e-06	3.00221e-06		50.994
		0.00152309	0.00147007	0.000152862	0.00036469	1	8.06622e-07	5.35218e-05	0.000652954	1.96993e-05	1.63352e-05	1.20409e-06	2.1373e-06	3.93549e-06	4.32336e-06		50.9917
		0.00157147	0.0016063	0.000181774	0.000386392	1	1.61733e-06	6.87479e-05	0.000783918	2.55806e-05	1.77722e-05	1.29127e-06	4.58427e-06	4.45496e-06	3.6811e-06		50.9895
		0.00154441	0.0015016	0.000168902	0.000365042	1	1.01207e-06	6.41603e-05	0.000720381	2.32768e-05	1.9752e-05	3.69157e-06	4.2961e-06	4.39469e-06	4.94181e-06		50.9872
		0.00156187	0.00167462	0.000184936	0.00039233	1	1.30949e-06	7.00965e-05	0.00075428	1.46064e-05	2.08858e-05	1.06783e-05	3.86321e-06	5.33522e-06	4.20559e-06		50.9849
		0.00148279	0.0015222	0.000167036	0.000427093	1	1.6345e-06	0.000152038	0.000685197	2.00195e-05	1.79657e-05	6.24234e-06	3.62016e-06	4.2217e-06	1.67797e-06		50.9827
		0.00152806	0.00159174	0.000173256	0.000378629	1	1.85562e-06	7.58169e-05	0.000677132	1.59477e-05	1.97572e-05	3.7683e-06	3.65445e-06	5.1591e-06	6.56782e-06		50.9804
		0.00138575	0.0014903	0.000169164	0.000352511	1	8.26048e-07	8.00249e-05	0.000697738	1.94647e-05	2.1746e-05	3.76168e-06	3.64803e-06	4.36619e-06	3.51523e-06		50.9782
		0.00157181	0.00164898	0.000193851	0.000381882	1	1.36935e-06	7.18413e-05	0.000713449	2.64281e-05	2.23184e-05	3.84639e-06	4.47627e-06	3.89204e-06	8.88097e-06		50.9759
		0.00146288	0.00148941	0.000176286	0.000326692	1	1.76158e-06	6.14014e-05	0.000794822	1.78365e-05	2.1604e-05	4.77978e-06	1.38767e-06	3.83275e-06	5.3673e-06		50.9736
		0.00160255	0.00156176	0.000174773	0.000366448	1	9.26057e-07	6.74927e-05	0.000652307	1.44609e-05	2.41067e-05	6.27269e-06	4.36537e-06	2.9024e-06	3.65692e-06		50.9714
		0.0015252	0.00149049	0.000176254	0.000366255	1	1.07329e-06	7.58735e-05	0.000481659	1.64104e-05	2.07362e-05	2.36382e-06	5.52479e-06	3.07287e-06	3.32723e-06		50.9691
		0.0017782	0.00164199	0.000184421	0.000407162	1	9.77182e-07	6.30903e-05	0.000711251	1.30213e-05	2.1945e-05	6.61899e-06	1.5354e-06	3.76952e-06	3.85881e-06		50.9669
		0.00149287	0.00147724	0.000170787	0.000300351	1	1.58506e-06	5.95946e-05	0.00109291	2.08444e-05	1.87462e-05	2.26236e-06	3.30472e-06	3.0424e-06	2.35805e-06		50.9646
		0.00154632	0.00167392	0.000196492	0.000346131	1	1.11341e-06	6.55265e-05	0.000649443	1.42393e-05	2.08755e-05	1.21076e-06	2.14916e-06	4.17721e-06	2.85446e-06		50.9623
		0.00165185	0.0016517	0.000202454	0.000350547	1	1.50391e-06	8.13597e-05	0.000728942	1.68825e-05	2.05445e-05	2.43183e-06	2.84183e-06	3.16128e-06	3.27489e-06		50.9601
		0.00169115	0.00167941	0.000212663	0.000374706	1	2.4419e-06	6.97277e-05	0.000697758	1.42379e-05	2.00248e-05	2.57798e-06	5.27212e-06	4.39151e-06	3.31479e-06		50.9578
		0.00153103	0.00159216	0.000193786	0.000313299	1	2.1278e-06	6.18597e-05	0.000651471	2.12672e-05	1.79116e-05	3.70513e-06	4.31188e-06	3.63882e-06	2.71363e-06		50.9556
		0.00156232	0.00160229	0.000213071	0.000338816	1	2.32298e-06	6.48679e-05	0.000613843	1.63294e-05	2.17521e-05	1.21089e-06	4.29891e-06	3.40796e-06	2.85476e-06		50.9533
		0.00160377	0.00152163	0.000216818	0.000299744	1	1.46932e-06	0.000269002	0.000614809	2.41714e-05	2.09235e-05	-3.18128e-08	2.23053e-06	3.53662e-06	1.72314e-06		50.951
		0.00172346	0.00149848	0.000208421	0.000320326	1	1.69054e-06	5.27817e-05	0.000596848	1.70674e-05	1.93291e-05	2.56326e-06	7.48875e-06	4.02167e-06	2.98376e-06		50.9488
		0.00165635	0.00148442	0.000248015	0.000342929	1	1.49805e-06	6.66616e-05	0.000649473	3.27483e-05	1.89783e-05	3.9084e-06	4.54844e-06	3.60578e-06	3.02046e-06		50.9465
		0.00145248	0.00162988	0.000256051	0.000326717	1	1.60146e-06	0.000170605	0.000655696	2.60648e-05	2.18771e-05	5.21162e-06	2.26956e-06	3.71462e-06	1.7533e-06		50.9443
		0.00149445	0.00152254	0.000283611	0.00029484	1	1.6669e-06	8.21231e-05	0.000635449	1.94774e-05	2.59165e-05	4.05991e-06	3.93724e-06	3.50388e-06	2.31715e-06		50.942
		0.00169783	0.00152285	0.000435605	0.000325678	1	1.32861e-06	7.66552e-05	0.000671628	1.86283e-05	3.79885e-05	-3.35413e-08	4.70359e-06	2.88669e-06	3.61355e-06		50.9397
		0.00142339	0.00158345	0.000260267	0.000271044	1	1.19719e-06	7.28904e-05	0.000682972	1.68078e-05	1.80035e-05	1.30187e-06	4.62191e-06	3.78224e-06	2.58774e-06		50.9375
		0.00172794	0.0016436	0.00027931	0.000346743	1	1.85666e-06	9.23486e-05	0.000802896	2.67369e-05	2.29618e-05	4.24032e-06	3.28978e-06	4.16443e-06	2.5915e-06		50.9352
		0.00152489	0.00162109	0.000262793	0.00030724	1	1.61327e-06	7.339e-05	0.000645359	2.10726e-05	2.02632e-05	3.92931e-06	1.5242e-06	4.79468e-06	2.56022e-06		50.933
		0.00159064	0.00163499	0.00027713	0.000359228	1	1.5909e-06	8.96469e-05	0.000737821	1.91304e-05	2.56917e-05	2.75562e-06	1.61006e-06	4.57056e-06	4.88528e-06		50.9307
		0.00148384	0.00146744	0.000247506	0.000307074	1	5.1981e-07	7.9189e-05	0.000867582	2.66391e-05	2.08403e-05	5.042e-06	2.92766e-06	4.37999e-06	3.37381e-06		50.9284
		0.00159606	0.00159587	0.000243145	0.000290264	1	1.28571e-06	8.34877e-05	0.00068015	2.02383e-05	2.09271e-05	-3.24581e-08	3.79302e-06	4.19046e-06	2.86455e-06		50.9262
		0.00155206	0.00146914	0.000238557	0.000286221	1	1.13223e-06	8.04468e-05	0.0007112	2.15594e-05	1.92081e-05	-3.11705e-08	2.91406e-06	3.46522e-06	3.05454e-06		50.9239
		0.00148092	0.0014459	0.000242947	0.000318014	1	1.60453e-06	7.34149e-05	0.000823003	1.43293e-05	1.9733e-05	1.28105e-06	6.064e-06	2.44226e-06	4.28378e-06		50.9216
		0.00144009	0.00145197	0.000228237	0.000283608	1	1.22343e-06	8.14577e-05	0.000647206	1.85566e-05	1.84723e-05	3.72176e-06	3.60931e-06	2.10433e-06	3.92919e-06		50.9194
		0.00145474	0.00167375	0.000241196	0.000345757	1	1.30724e-06	8.93333e-05	0.000814426	1.98277e-05	2.14487e-05	5.31341e-06	2.31389e-06	3.19534e-06	2.75181e-06		50.9171
		0.00148075	0.00148717	0.000269584	0.000322664	1	1.08396e-06	8.00003e-05	0.000736437	2.19957e-05	1.75382e-05	2.38732e-06	4.88219e-06	3.31747e-06	2.4883e-06		50.9149
		0.00148801	0.00155072	0.00636585	0.000310728	1	9.93433e-07	8.93779e-05	0.000644128	1.73841e-05	1.64262e-05	4.84158e-06	1.40561e-06	4.85309e-06	2.06812e-06		50.9126
		0.00151877	0.00157301	0.000292332	0.000355987	1	1.24347e-06	8.75687e-05	0.000752777	1.52958e-05	1.99955e-05	2.51134e-06	3.66842e-06	3.8276e-06	2.77045e-06		50.9104
		0.00162302	0.00154118	0.000259823	0.000284616	1	1.37268e-06	8.82859e-05	0.000759868	2.43121e-05	2.15431e-05	6.44773e-06	6.73084e-06	4.70494e-06	2.5123e-06		50.9081
		0.00135978	0.00140958	0.000244538	0.00030423	1	9.37841e-07	7.85734e-05	0.000608083	2.47936e-05	2.06587e-05	1.12134e-06	2.65397e-06	3.97052e-06	2.36713e-06		50.9058
		0.00156165	0.0015263	0.000236562	0.00030577	1	7.02032e-07	9.09635e-05	0.000839276	2.23295e-05	1.99247e-05	2.42354e-06	2.83214e-06	3.80244e-06	4.00146e-06		50.9036
		0.0014615	0.00142935	0.000254111	0.000304345	1	1.36035e-06	9.48472e-05	0.000781703	2.57238e-05	2.02881e-05	4.74212e-06	5.50715e-06	2.85178e-06	3.02971e-06		50.9013
		0.00144595	0.00145685	0.00026543	0.000340859	1	1.28945e-06	0.000116825	0.000776753	1.8059e-05	2.02368e-05	4.83942e-06	2.81004e-06	3.44933e-06	4.55583e-06		50.8991
		0.00138803	0.00151446	0.00026965	0.000278979	1	1.14375e-06	0.000105933	0.000719289	1.80037e-05	1.96646e-05	2.30994e-06	2.6994e-06	4.14206e-06	3.11076e-06		50.8968
		0.00150687	0.00159378	0.000262539	0.000341628	1	1.66703e-06	0.000108898	0.000853258	2.83121e-05	1.99613e-05	5.08698e-06	3.69221e-06	3.85242e-06	4.48109e-06		50.8945
		0.00153344	0.00154256	0.000282777	0.000361783	1	6.84318e-07	0.00010345	0.000694384	1.90832e-05	1.95751e-05	3.55835e-06	2.76068e-06	2.64737e-06	3.18138e-06		50.8923
		0.00153558	0.00159909	0.000275015	0.00034245	1	1.33499e-06	0.000110645	0.000796942	2.22307e-05	2.3776e-05	5.01033e-06	5.09125e-06	3.01308e-06	5.01986e-06		50.89
		0.00147032	0.00149486	0.000254528	0.000307881	1	1.26066e-06	0.000116137	0.000732049	1.63209e-05	1.93277e-05	2.35092e-06	5.49464e-06	2.52912e-06	4.0247e-06		50.8877
		0.00159545	0.00157334	0.000297482	0.000345231	1	2.08601e-06	0.000148687	0.000736822	2.26083e-05	2.27024e-05	5.09543e-06	8.87636e-06	4.08585e-06	4.64268e-06		50.8855
		0.00147757	0.00161689	0.00034094	0.000323459	1	7.3221e-07	0.000105462	0.00064739	2.83131e-05	2.02897e-05	2.52772e-06	7.38454e-07	3.62591e-06	1.86529e-06		50.8832
		0.00142335	0.0014348	0.000290176	0.000347857	1	2.12997e-06	0.000145048	0.000857643	1.9415e-05	2.10023e-05	3.89393e-06	6.04215e-06	4.51968e-06	3.48141e-06		50.881
		0.00144561	0.00135753	0.000280215	0.000337248	1	3.64266e-06	0.000125893	0.000743316	1.971e-05	1.99711e-05	2.52886e-06	2.21637e-06	3.85431e-06	3.86744e-06		50.8787
		0.00156229	0.00133555	0.00101395	0.000353948	1	1.57076e-06	0.000135443	0.000783513	1.33067e-05	1.83302e-05	6.39757e-06	2.96815e-06	4.8961e-06	4.81218e-06		50.8764
		0.00149955	0.00144595	0.00033303	0.00035867	1	1.98915e-06	0.000131622	0.00081342	3.42342e-05	2.08905e-05	6.40032e-06	3.71177e-06	5.01215e-06	3.57664e-06		50.8742
		0.00141054	0.00145837	0.000321956	0.000320258	1	2.11534e-06	0.000137608	0.000782823	1.90598e-05	1.8916e-05	3.68344e-06	7.14415e-07	4.60431e-06	4.48426e-06		50.8719
		0.00149523	0.00143037	0.000315378	0.000356337	1	1.28289e-06	0.000151733	0.000724082	2.0684e-05	2.09868e-05	6.02596e-06	5.59156e-06	4.18263e-06	3.80439e-06		50.8697
		0.00135778	0.00150066	0.000327768	0.000295247	1	1.94263e-06	0.000138694	0.00089548	1.93415e-05	2.2815e-05	1.22528e-06	3.62495e-06	3.67099e-06	4.39947e-06		50.8674
		0.00140331	0.00136859	0.000328413	0.000365846	1	2.2612e-06	0.000124152	0.000798777	2.0374e-05	2.01357e-05	6.58429e-06	2.29103e-06	3.86696e-06	4.31603e-06		50.8651
		0.0014928	0.00143284	0.000312108	0.000363412	1	1.169e-06	0.000124242	0.000726805	1.56811e-05	1.9081e-05	1.27122e-06	3.00869e-06	4.96297e-06	4.09416e-06		50.8629
		0.00156974	0.00153031	0.000874743	0.000369498	1	1.35966e-06	0.000127726	0.00922906	2.2182e-05	2.17749e-05	5.52648e-06	5.61574e-06	4.80086e-06	3.698e-06		50.8606
		0.00144695	0.0015098	0.000381403	0.000332786	1	1.89297e-06	0.000141721	0.000629116	2.10582e-05	2.15998e-05	1.33404e-06	3.15737e-06	4.11795e-06	3.14508e-06		50.8584
		0.00151584	0.00145654	0.000395031	0.000389393	1	2.40846e-06	0.000136838	0.000895329	1.62084e-05	1.99978e-05	2.54268e-06	4.45709e-06	4.33137e-06	5.43663e-06		50.8561
		0.00146224	0.00148515	0.000354913	0.000390836	1	1.22064e-06	0.000147871	0.000789159	1.99139e-05	1.97082e-05	2.46523e-06	5.04153e-06	5.08372e-06	4.22038e-06		50.8538
		0.00141983	0.00146301	0.000352523	0.000390482	1	2.76932e-06	0.000142769	0.000797492	1.02229e-05	1.83825e-05	3.75246e-06	1.45561e-06	4.69059e-06	4.56829e-06		50.8516
		0.00153659	0.00139932	0.000389713	0.000402054	1	1.97773e-06	0.000172937	0.000860205	1.89738e-05	1.73324e-05	3.80544e-06	2.21423e-06	4.19042e-06	3.70991e-06		50.8493
		0.00149558	0.00151093	0.000382105	0.000382283	1	1.96953e-06	0.000168368	0.000724882	2.81813e-05	2.05214e-05	3.78965e-06	2.94014e-06	3.94743e-06	3.69452e-06		50.8471
		0.00156088	0.00154165	0.000368267	0.000377242	1	2.19972e-06	0.000172957	0.000851042	1.54885e-05	2.09891e-05	7.69277e-06	2.22874e-06	4.33188e-06	4.19867e-06		50.8448
		0.00152044	0.00149938	0.000377325	0.000327388	1	2.16243e-06	0.000160599	0.000792978	2.16133e-05	2.08764e-05	7.56238e-06	6.57317e-06	6.05198e-06	5.80176e-06		50.8425
		0.00141123	0.00149792	0.000343283	0.000343438	1	3.13128e-06	0.000169988	0.000849806	2.19129e-05	1.91409e-05	8.66575e-06	3.58458e-06	4.95043e-06	4.05167e-06		50.8403
		0.00168634	0.00158058	0.000522196	0.000378815	1	3.01671e-06	0.000143981	0.000891058	2.26263e-05	2.20245e-05	5.26693e-06	2.29365e-06	2.93274e-06	4.32096e-06		50.838
		0.00141347	0.00131216	0.000309101	0.000387486	1	1.9577e-06	0.000141408	0.000844218	1.3102e-05	1.98309e-05	7.56531e-06	5.84504e-06	4.14799e-06	5.95627e-06		50.8358
		0.00140115	0.00146351	0.000329947	0.000383922	1	2.31127e-06	0.000122935	0.000653334	1.34763e-05	1.99025e-05	2.44007e-06	3.56431e-06	3.71898e-06	2.84036e-06		50.8335
		0.00158175	0.00154051	0.000325208	0.000431624	1	2.07803e-06	0.000125833	0.000866084	1.89416e-05	2.17981e-05	2.52214e-06	4.4211e-06	4.97492e-06	5.23917e-06		50.8312
		0.00149752	0.00147164	0.000351718	0.00043445	1	2.00842e-06	0.000138074	0.000739197	3.31088e-05	2.19245e-05	9.06016e-06	2.24859e-06	5.29078e-06	4.70468e-06		50.829
		0.00159955	0.00154222	0.000290981	0.000387537	1	2.37835e-06	0.000136908	0.000825693	2.31343e-05	2.01546e-05	5.0533e-06	5.13491e-06	5.17789e-06	5.06291e-06		50.8267
		0.0016528	0.00157576	0.000309123	0.000424967	1	2.27401e-06	0.000141494	0.000942114	1.38605e-05	2.12832e-05	1.0133e-05	7.3317e-07	4.61266e-06	3.83803e-06		50.8245
		0.00155643	0.00160472	0.000339678	0.000398702	1	2.26981e-06	0.000158971	0.00092397	1.82167e-05	2.08926e-05	1.29561e-06	4.59966e-06	5.05819e-06	3.69346e-06		50.8222
		0.00146984	0.0014759	0.000300015	0.000437613	1	1.28141e-06	0.00014973	0.000931835	1.79464e-05	1.94911e-05	2.38963e-06	4.18881e-06	3.6421e-06	4.09096e-06		50.8199
		0.00164593	0.00165686	0.000328146	0.000393735	1	2.04466e-06	0.000161805	0.000668958	1.96159e-05	2.07117e-05	7.90135e-06	6.10467e-06	2.34155e-06	5.10762e-06		50.8177
		0.00158925	0.0015837	0.000313429	0.000355577	1	1.89258e-06	0.000164619	0.0011658	2.4234e-05	2.18046e-05	3.84337e-06	3.72725e-06	4.461e-06	5.14502e-06		50.8154
		0.00155081	0.00159202	0.000318857	0.000427254	1	2.17485e-06	0.000160559	0.000768274	3.10177e-05	1.9937e-05	7.60582e-06	4.40724e-06	3.83201e-06	5.37582e-06		50.8132
		0.00156587	0.00149856	0.000299025	0.000433971	1	1.87971e-06	0.00016069	0.000740722	2.34872e-05	2.01302e-05	6.04816e-06	2.80605e-06	4.52104e-06	3.23366e-06		50.8109
		0.00150748	0.00146458	0.000316887	0.00037506	1	1.84495e-06	0.000155142	0.000692743	2.17146e-05	2.04455e-05	-2.94601e-08	6.19698e-06	3.80341e-06	4.03477e-06		50.8086
		0.00147991	0.0016023	0.000337718	0.00040528	1	2.71827e-06	0.000196028	0.000804136	8.64621e-06	2.05002e-05	4.92137e-06	5.71531e-06	3.39809e-06	5.07962e-06		50.8064
		0.0014891	0.00153494	0.000337667	0.000375367	1	2.09561e-06	0.000151269	0.00084601	1.8882e-05	1.55216e-05	1.19617e-06	2.83108e-06	4.34412e-06	4.73744e-06		50.8041
		0.00155418	0.00145936	0.000380034	0.000422398	1	2.32978e-06	0.000181414	0.000823144	1.00931e-05	1.84678e-05	2.45962e-06	9.34183e-06	3.30767e-06	4.21078e-06		50.8019
		0.00163609	0.00171515	0.000377669	0.000416978	1	9.12452e-07	0.000200064	0.000921141	1.98213e-05	1.82649e-05	9.90744e-06	3.58431e-06	3.84986e-06	3.6032e-06		50.7996
		0.00179407	0.0016856	0.000380457	0.000417059	1	1.11434e-06	0.000166654	0.000807064	1.84317e-05	2.04953e-05	4.93929e-06	5.01906e-06	4.95103e-06	3.4545e-06		50.7973
		0.00174776	0.00163877	0.000412434	0.000438653	1	2.13492e-06	0.000167592	0.000746986	1.22296e-05	1.74917e-05	4.96711e-06	4.32631e-06	4.31493e-06	3.3237e-06		50.7951
		0.00167998	0.00168301	0.000431304	0.000418583	1	2.8294e-06	0.000191119	0.000771458	1.91308e-05	1.93047e-05	2.45455e-06	3.58546e-06	3.52095e-06	4.35154e-06		50.7928
		0.00170992	0.00166639	0.000418153	0.000422445	1	2.07011e-06	0.000229111	0.00102363	2.24361e-05	1.86209e-05	3.78451e-06	2.93615e-06	3.94208e-06	4.45434e-06		50.7906
		0.00170448	0.00179504	0.000455065	0.000419796	1	3.25562e-06	0.000273466	0.000905821	2.85783e-05	2.08104e-05	1.25975e-06	1.49074e-06	5.49022e-06	3.59124e-06		50.7883
		0.0016439	0.00163731	0.000457056	0.000396746	1	3.38655e-06	0.0003531	0.000760637	1.95495e-05	1.78576e-05	6.0958e-06	8.48473e-06	4.66516e-06	3.70114e-06		50.786
		0.00165844	0.00161392	0.000482046	0.000419426	1	2.56966e-06	0.000203345	0.000887137	2.21163e-05	1.84899e-05	7.26144e-06	3.50636e-06	4.8424e-06	5.86319e-06		50.7838
		0.00164001	0.00162392	0.000506202	0.000438418	1	2.18356e-06	0.000227815	0.000904643	1.94663e-05	1.91871e-05	3.62978e-06	2.11203e-06	3.34873e-06	6.47314e-06		50.7815
		0.00159041	0.00166653	0.000521398	0.000418484	1	3.04561e-06	0.00021293	0.00081961	2.26687e-05	1.74571e-05	2.38681e-06	4.18386e-06	4.17286e-06	5.82999e-06		50.7792
		0.00164407	0.00161289	0.000528228	0.000385754	1	1.16085e-06	0.000216618	0.000948345	1.96043e-05	1.81352e-05	2.34449e-06	4.79461e-06	4.30912e-06	5.86937e-06		50.777
		0.00177954	0.00169239	0.000536576	0.000404002	1	2.06666e-06	0.00022038	0.000915947	2.36047e-05	1.5869e-05	3.43546e-06	3.99805e-06	4.80569e-06	7.2377e-06		50.7747
		0.00173481	0.00166571	0.000588103	0.000406591	1	2.3399e-06	0.000236051	0.000792341	1.57644e-05	1.78534e-05	5.96345e-06	4.15015e-06	6.26255e-06	7.22469e-06		50.7725
		0.00166915	0.00173247	0.00058769	0.000423783	1	2.29457e-06	0.000265218	0.000993188	1.5459e-05	1.80342e-05	7.02342e-06	4.74803e-06	5.10011e-06	6.80198e-06		50.7702
		0.00177468	0.0016977	0.000646049	0.000405275	1	3.2568e-06	0.000258045	0.000792438	1.61575e-05	1.838e-05	7.04061e-06	7.47965e-06	5.21694e-06	5.40146e-06		50.7679
		0.00186483	0.00180798	0.000688634	0.000432706	1	2.5147e-06	0.000295222	0.00101657	1.62656e-05	1.86586e-05	1.11002e-05	3.56838e-06	5.14713e-06	5.52068e-06		50.7657
		0.00187611	0.00170687	0.00075686	0.000425367	1	3.19543e-06	0.00039517	0.00103077	2.85522e-05	2.09677e-05	8.56729e-06	6.37909e-06	5.98208e-06	4.00564e-06		50.7634
		0.00173779	0.00176935	0.000752696	0.000408565	1	2.57272e-06	0.00038689	0.00095638	1.67244e-05	2.09028e-05	3.48606e-06	6.76168e-06	5.08404e-06	5.3713e-06		50.7612
		0.00185633	0.00184835	0.000766686	0.000494489	1	4.27339e-06	0.000402957	0.00119493	1.12826e-05	2.33022e-05	9.75227e-06	7.76225e-06	6.28055e-06	7.07625e-06		50.7589
		0.00171158	0.00179521	0.000830986	0.000440958	1	3.56175e-06	0.000395482	0.0012593	2.27824e-05	2.11302e-05	4.97642e-06	3.61196e-06	5.87529e-06	5.73867e-06		50.7567
		0.00176033	0.00175927	0.000772815	0.000405543	1	2.64821e-06	0.000413395	0.00119504	2.209e-05	1.66506e-05	8.73578e-06	6.50455e-06	6.09972e-06	6.49431e-06		50.7544
		0.00166409	0.00176229	0.000817023	0.000448351	1	3.29635e-06	0.000372316	0.00114484	1.83601e-05	1.66951e-05	3.54822e-06	4.81746e-06	4.22404e-06	4.03281e-06		50.7521
		0.00176934	0.00188777	0.00187219	0.000391178	1	4.15551e-06	0.000377172	0.00124903	2.25445e-05	1.96108e-05	8.91551e-06	5.1631e-06	5.9988e-06	6.78167e-06		50.7499
		0.00178076	0.00178378	0.000967348	0.000375835	1	3.55245e-06	0.000396434	0.00110949	2.14117e-05	2.01795e-05	8.46753e-06	2.80208e-06	6.88021e-06	8.33912e-06		50.7476
		0.00171859	0.0019205	0.0010425	0.000472539	1	4.08459e-06	0.000506519	0.00117619	1.84215e-05	1.95846e-05	5.95328e-06	3.45252e-06	5.93389e-06	6.78059e-06		50.7454
		0.00183738	0.00173812	0.00113574	0.000376911	1	2.4324e-06	0.000515026	0.00110299	2.26762e-05	1.81605e-05	9.93735e-06	4.31422e-06	6.17901e-06	7.21055e-06		50.7431
		0.00177902	0.00187779	0.00123517	0.000411585	1	4.07391e-06	0.000574366	0.00141846	2.69923e-05	1.97181e-05	7.6792e-06	2.2248e-06	7.51157e-06	6.35507e-06		50.7408
		0.00173149	0.00182965	0.00127234	0.000542109	1	2.86739e-06	0.000567025	0.00136824	1.86815e-05	1.99669e-05	7.52497e-06	9.44777e-06	9.36899e-06	8.04511e-06		50.7386
		0.00188055	0.00184233	0.00135987	0.000416754	1	6.06819e-06	0.00057043	0.00136538	2.36545e-05	1.88629e-05	8.53989e-06	5.65213e-06	7.91516e-06	7.8213e-06		50.7363
		0.00171901	0.00168866	0.0012423	0.000438595	1	3.56976e-06	0.000502541	0.0011028	2.16811e-05	1.83979e-05	1.0373e-05	6.00244e-06	5.83361e-06	8.07822e-06		50.734
		0.00173698	0.00170539	0.00135866	0.000432484	1	5.71304e-06	0.000517134	0.00142498	8.99116e-06	2.21754e-05	9.50428e-06	4.1262e-06	7.07095e-06	7.46969e-06		50.7318
		0.00197549	0.00190765	0.00165552	0.000400495	1	3.72849e-06	0.000545822	0.00153082	1.0327e-05	1.96299e-05	1.27096e-05	9.55839e-06	7.78549e-06	7.5263e-06		50.7295
		0.00184368	0.00169771	0.00153696	0.000392288	1	3.40943e-06	0.000525313	0.00216388	1.44163e-05	1.99197e-05	9.55691e-06	1.10647e-05	9.23344e-06	8.52007e-06		50.7273
		0.00186001	0.00192401	0.00158243	0.000499718	1	3.26275e-06	0.000535457	0.00139862	2.28237e-05	2.30154e-05	1.12562e-05	7.961e-06	6.88574e-06	9.82204e-06		50.725
		0.00196035	0.00174096	0.00166979	0.000475986	1	2.38388e-06	0.000566471	0.00132569	2.03299e-05	2.12618e-05	5.06504e-06	1.25001e-05	8.01153e-06	6.91356e-06		50.7227
		0.00176338	0.00182064	0.00154254	0.000438567	1	2.84442e-06	0.000546955	0.00132854	2.06336e-05	2.13265e-05	6.21535e-06	5.04634e-06	6.85907e-06	7.22933e-06		50.7205
		0.00192256	0.00186557	0.00167629	0.00043213	1	4.49915e-06	0.000607844	0.00125066	1.98196e-05	1.84342e-05	5.11777e-06	8.17231e-06	7.86683e-06	6.36616e-06		50.7182
		0.00192744	0.00194172	0.00171759	0.000489195	1	4.29298e-06	0.000600224	0.00124343	1.23091e-05	2.03423e-05	7.51472e-06	1.01608e-05	8.91053e-06	6.824e-06		50.716
		0.00192281	0.00190965	0.00187161	0.000457347	1	3.27864e-06	0.000669081	0.0015504	1.23345e-05	1.83676e-05	7.5302e-06	1.3091e-05	7.25418e-06	6.98963e-06		50.7137
		0.00204249	0.00191995	0.001829	0.000478491	1	4.74443e-06	0.00066022	0.00132741	1.56073e-05	2.12331e-05	3.85975e-06	7.48648e-06	9.65139e-06	9.22393e-06		50.7114
		0.00190838	0.00192133	0.00186626	0.000476423	1	4.36718e-06	0.00121266	0.00151508	2.11309e-05	1.97111e-05	6.36515e-06	8.85963e-06	9.40459e-06	9.5581e-06		50.7092
		0.00191844	0.00190853	0.00195328	0.000435148	1	4.42134e-06	0.000891654	0.00133815	2.44432e-05	1.77106e-05	1.00899e-05	8.03097e-06	9.18789e-06	7.0169e-06		50.7069
		0.00183817	0.00187727	0.00202639	0.000437189	1	3.6691e-06	0.000707509	0.00143432	1.29747e-05	1.67495e-05	4.98418e-06	8.68257e-06	6.77293e-06	6.19999e-06		50.7047
		0.00191615	0.00178077	0.0020471	0.000468811	1	4.57495e-06	0.000722051	0.00137352	1.85571e-05	1.84729e-05	9.97683e-06	5.77517e-06	9.19579e-06	8.29252e-06		50.7024
		0.00176666	0.00188771	0.00221164	0.000473852	1	4.02087e-06	0.000776484	0.00145835	0.000112767	2.01921e-05	1.01161e-05	9.51588e-06	1.03357e-05	7.79796e-06		50.7001
		0.00202421	0.00186109	0.00227504	0.000454393	1	3.90639e-06	0.000724402	0.00136587	1.45623e-05	1.94558e-05	6.64136e-06	5.39223e-06	9.8127e-06	1.0294e-05		50.6979
		0.00199658	0.00191664	0.00266437	0.00050104	1	4.64621e-06	0.000825758	0.0016672	2.53744e-05	2.00537e-05	1.11198e-05	1.046e-05	1.13611e-05	1.09198e-05		50.6956
		0.0018515	0.00193569	0.00227923	0.000496145	1	6.2183e-06	0.000803812	0.00164991	1.60601e-05	2.07129e-05	5.07045e-06	6.62454e-06	8.02009e-06	9.83607e-06		50.6934
		0.00192279	0.00193986	0.00247662	0.000508316	1	4.2101e-06	0.000866984	0.00159313	1.77573e-05	1.89567e-05	1.03277e-05	1.1957e-05	9.86336e-06	9.83031e-06		50.6911
		0.00192017	0.00191123	0.00257864	0.000512925	1	4.88487e-06	0.000896747	0.00187822	1.71857e-05	1.9714e-05	7.80789e-06	1.05572e-05	9.72124e-06	9.91945e-06		50.6888
		0.00198354	0.00191285	0.00279393	0.000512228	1	4.53658e-06	0.00122673	0.00166559	2.04599e-05	2.16667e-05	6.61205e-06	8.43633e-06	1.08292e-05	1.13678e-05		50.6866
		0.0019307	0.00195582	0.00280338	0.000452117	1	5.6032e-06	0.00135219	0.00210968	2.36774e-05	1.80465e-05	1.03761e-05	1.2764e-05	9.33327e-06	1.08155e-05		50.6843
		0.00212528	0.00203776	0.00296812	0.00052747	1	5.46986e-06	0.00154392	0.00226174	2.62403e-05	1.85608e-05	9.2062e-06	1.21868e-05	1.02868e-05	8.74907e-06		50.6821
		0.00221374	0.00209835	0.00329616	0.000515768	1	4.93704e-06	0.00150912	0.00187327	2.97718e-05	1.88856e-05	9.63024e-06	1.11545e-05	1.28404e-05	1.11451e-05		50.6798
		0.00206457	0.00210421	0.00300002	0.000521924	1	7.50092e-06	0.00146691	0.00208717	2.37256e-05	1.94042e-05	6.29217e-06	8.02819e-06	1.07536e-05	1.02092e-05		50.6775
		0.00201205	0.002039	0.00314564	0.00043014	1	6.42896e-06	0.00167865	0.00238129	1.88226e-05	1.9642e-05	1.05171e-05	1.21764e-05	1.15634e-05	1.03279e-05		50.6753
		0.00207191	0.00203551	0.00311729	0.000464053	1	5.3695e-06	0.00151535	0.00215312	1.5587e-05	2.31134e-05	1.29244e-05	1.19632e-05	1.06721e-05	1.20176e-05		50.673
		0.00219707	0.00220998	0.00308929	0.000486126	1	5.98899e-06	0.00158214	0.00194794	1.70066e-05	1.98396e-05	1.03127e-05	1.2686e-05	1.07657e-05	9.19388e-06		50.6707
		0.00205948	0.001994	0.00322666	0.000423772	1	5.35095e-06	0.00145209	0.00223016	2.2193e-05	1.95687e-05	6.0671e-06	1.126e-05	9.61252e-06	9.55065e-06		50.6685
		0.00212112	0.00210966	0.00311053	0.00045975	1	6.27936e-06	0.0013776	0.00192798	1.77918e-05	2.04015e-05	1.36809e-05	6.4739e-06	1.15929e-05	1.26118e-05		50.6662
		0.00206928	0.00215806	0.0031529	0.000451565	1	5.24234e-06	0.00151746	0.00197835	1.80551e-05	2.11083e-05	1.26183e-05	7.2997e-06	9.74684e-06	1.0059e-05		50.664
		0.00213106	0.00208916	0.003124	0.000490447	1	8.23052e-06	0.00143721	0.00192578	1.30019e-05	1.95834e-05	1.06973e-05	1.44444e-05	1.16128e-05	1.22023e-05		50.6617
		0.0021084	0.00213027	0.00306074	0.000472052	1	5.09146e-06	0.00138422	0.00179415	2.02912e-05	2.30179e-05	9.79794e-06	1.55981e-05	9.68402e-06	1.13953e-05		50.6594
		0.00220656	0.00215902	0.00315768	0.000473853	1	5.02624e-06	0.0014683	0.00201304	2.11254e-05	2.11178e-05	3.68043e-06	1.07083e-05	1.33688e-05	1.25161e-05		50.6572
		0.00228284	0.002185	0.00314565	0.00048048	1	7.84214e-06	0.00173843	0.00212525	2.31137e-05	2.24133e-05	8.85895e-06	1.68583e-05	1.27125e-05	1.23917e-05		50.6549
		0.00203903	0.00206724	0.00286894	0.000475602	1	5.79096e-06	0.00140927	0.00186839	1.38551e-05	2.18591e-05	1.205e-05	9.06229e-06	1.11275e-05	1.32394e-05		50.6527
		0.00208016	0.00187829	0.00274426	0.000450677	1	6.56938e-06	0.00131788	0.00192623	2.94431e-05	1.88315e-05	1.26777e-05	1.26656e-05	8.79806e-06	9.60235e-06		50.6504
		0.0020426	0.00205569	0.00310413	0.000441664	1	6.47597e-06	0.00159637	0.00214878	2.30458e-05	1.97123e-05	1.17271e-05	1.13103e-05	1.21518e-05	1.25909e-05		50.6482
		0.00208433	0.00195997	0.00306645	0.000532655	1	8.24684e-06	0.00163833	0.00215243	2.87843e-05	2.10108e-05	1.39261e-05	1.17159e-05	1.2138e-05	1.28378e-05		50.6459
		0.00226688	0.00214679	0.00301127	0.000560295	1	5.707e-06	0.0015672	0.00216624	3.25499e-05	2.19631e-05	1.14613e-05	6.6322e-06	1.22159e-05	1.19983e-05		50.6436
		0.00227731	0.0021103	0.00296191	0.000472104	1	8.16292e-06	0.00179811	0.00231126	1.88665e-05	2.15487e-05	1.77746e-05	1.02754e-05	1.03633e-05	1.50106e-05		50.6414
		0.00213022	0.00205098	0.00299052	0.000485909	1	7.27246e-06	0.00190834	0.00244353	2.36507e-05	2.33786e-05	8.79376e-06	1.09132e-05	9.82594e-06	1.24522e-05		50.6391
		0.0021288	0.00235328	0.00300041	0.000418015	1	6.8892e-06	0.00309343	0.00202628	2.03959e-05	2.30408e-05	1.32158e-05	1.52915e-05	1.07953e-05	1.35638e-05		50.6369
		0.00204303	0.00211904	0.00304755	0.000501552	1	7.09542e-06	0.0015558	0.00200866	1.99062e-05	2.63315e-05	1.36929e-05	1.29597e-05	1.09397e-05	1.20224e-05		50.6346
		0.00212394	0.00214639	0.00325419	0.000462317	1	7.16885e-06	0.00181472	0.00222641	3.94772e-05	2.67824e-05	6.55194e-06	7.59963e-06	1.32983e-05	1.22151e-05		50.6323
		0.00232826	0.00204689	0.00314083	0.000465106	1	5.70144e-06	0.00150001	0.00223371	3.8263e-05	2.789e-05	1.24989e-05	1.0123e-05	1.1431e-05	1.10189e-05		50.6301
		0.00220745	0.00208281	0.00301636	0.000407569	1	6.38734e-06	0.00142164	0.00182979	3.16082e-05	2.72482e-05	1.13801e-05	9.51214e-06	9.76987e-06	9.01505e-06		50.6278
		0.00208135	0.00211466	0.00319759	0.00044361	1	5.5358e-06	0.00148019	0.0020276	3.10514e-05	2.94759e-05	1.0653e-05	8.47919e-06	1.27781e-05	1.36756e-05		50.6256
		0.00231569	0.00226931	0.00339946	0.000432257	1	7.04458e-06	0.00145695	0.00215775	2.38947e-05	2.70306e-05	1.21591e-05	1.87639e-05	1.10388e-05	1.0284e-05		50.6233
		0.00226429	0.00222128	0.00326611	0.00048964	1	6.44702e-06	0.00146887	0.00206458	2.82453e-05	2.92452e-05	9.38043e-06	6.20844e-06	1.04815e-05	8.91464e-06		50.621
		0.00207466	0.00199636	0.00344543	0.0004803	1	5.73245e-06	0.00158914	0.00180263	2.30426e-05	2.84937e-05	1.17255e-05	8.29294e-06	1.23817e-05	1.36896e-05		50.6188
		0.00214232	0.00222061	0.00332059	0.000479512	1	6.03009e-06	0.00154264	0.00223685	3.26148e-05	3.00389e-05	6.3659e-06	1.77224e-05	1.13331e-05	1.41776e-05		50.6165
		0.00217471	0.00206718	0.00329459	0.000455721	1	6.8942e-06	0.0015097	0.00179123	3.29386e-05	2.442e-05	1.088e-05	1.32918e-05	1.19186e-05	1.25565e-05		50.6142
		0.0021959	0.00207125	0.00333984	0.000434262	1	6.10784e-06	0.00153481	0.00209865	2.6825e-05	2.55899e-05	8.45712e-06	9.79569e-06	1.05241e-05	1.03709e-05		50.612
		0.00218283	0.00230488	0.00348315	0.000449631	1	7.59772e-06	0.00156328	0.00219467	2.79594e-05	2.68339e-05	1.63975e-05	7.29264e-06	1.42172e-05	1.20258e-05		50.6097
		0.00228166	0.00214418	0.00344815	0.00043201	1	6.68926e-06	0.00160756	0.00202275	2.27018e-05	2.61682e-05	1.49386e-05	1.2958e-05	1.17121e-05	1.11203e-05		50.6075
		0.00215879	0.00236389	0.00342239	0.00039303	1	6.86194e-06	0.00170571	0.0023238	2.51033e-05	2.59249e-05	9.06296e-06	1.42468e-05	1.18538e-05	1.09575e-05		50.6052
		0.00220234	0.00221191	0.00334956	0.000393528	1	5.65903e-06	0.00156682	0.00193666	1.02634e-05	2.60764e-05	1.1365e-05	1.02303e-05	1.11033e-05	1.00693e-05		50.6029
		0.00222689	0.00229684	0.0033687	0.000489702	1	8.74711e-06	0.001609	0.00216332	1.80796e-05	2.55169e-05	8.83524e-06	1.38889e-05	1.26785e-05	9.61548e-06		50.6007
		0.00208366	0.00197069	0.00310941	0.0004077	1	9.24236e-06	0.0015365	0.00221597	3.25529e-05	2.24491e-05	9.75587e-06	1.1295e-05	1.38704e-05	1.25239e-05		50.5984
		0.00205707	0.00201636	0.00308436	0.000371394	1	5.26709e-06	0.00146184	0.00220139	2.56865e-05	2.36189e-05	9.75371e-06	1.76453e-05	1.09408e-05	1.75253e-05		50.5962
		0.00203664	0.00201968	0.00313868	0.000424448	1	5.61529e-06	0.00148183	0.0021147	2.52264e-05	2.73104e-05	2.34175e-05	9.25784e-06	1.11489e-05	1.24857e-05		50.5939
		0.00207384	0.00205791	0.0030637	0.00048141	1	7.15115e-06	0.00151927	0.00531998	1.94872e-05	2.83152e-05	6.53576e-06	9.09711e-06	1.09371e-05	1.55044e-05		50.5916
		0.00218141	0.00193219	0.00294454	0.000420691	1	5.76398e-06	0.00150345	0.00205444	2.75895e-05	2.32658e-05	1.179e-05	1.21291e-05	1.08201e-05	1.20262e-05		50.5894
		0.00211914	0.00211698	0.00288535	0.000396011	1	5.42567e-06	0.00141487	0.00228907	2.04875e-05	2.14266e-05	6.38827e-06	1.11149e-05	1.26247e-05	1.42275e-05		50.5871
		0.00202251	0.00211361	0.00264772	0.000416022	1	7.32509e-06	0.0014524	0.00210935	2.3862e-05	2.25865e-05	1.35554e-05	6.41449e-06	1.08298e-05	1.26447e-05		50.5849
		0.0021448	0.00212702	0.00262104	0.00040761	1	5.15229e-06	0.00143938	0.00267689	3.30339e-05	2.22969e-05	8.84502e-06	1.46361e-05	1.08945e-05	1.29825e-05		50.5826
		0.00188228	0.00197275	0.00238399	0.000394604	1	5.42547e-06	0.00135053	0.00186014	2.67619e-05	2.34128e-05	1.72406e-05	9.96546e-06	1.04008e-05	1.2479e-05		50.5803
		0.00202367	0.00201963	0.00247606	0.000433286	1	9.17928e-06	0.00143546	0.00194176	2.56633e-05	2.36822e-05	1.00122e-05	1.23163e-05	9.78458e-06	1.60255e-05		50.5781
		0.00200839	0.00208632	0.00247706	0.000392791	1	5.48497e-06	0.00196982	0.00177932	2.31778e-05	2.19863e-05	7.60999e-06	8.81953e-06	8.79782e-06	1.34988e-05		50.5758
		0.00211091	0.00187867	0.00236619	0.000407997	1	5.46399e-06	0.00132382	0.00170985	2.13574e-05	2.29854e-05	1.03128e-05	1.19398e-05	1.27138e-05	1.61953e-05		50.5736
		0.00179654	0.00199295	0.00227338	0.000323135	1	1.41438e-05	0.00137055	0.00175873	3.30909e-05	2.16258e-05	7.43013e-06	1.21993e-05	1.06833e-05	1.39279e-05		50.5713
		0.00184159	0.00189997	0.0023513	0.000385314	1	4.45044e-06	0.00128362	0.00167432	2.33476e-05	2.26008e-05	8.68107e-06	1.14916e-05	1.03617e-05	1.36404e-05		50.569
		0.0020477	0.00198952	0.0023838	0.000443091	1	6.26536e-06	0.00144429	0.00200272	2.49401e-05	2.96775e-05	1.06027e-05	1.15082e-05	1.29535e-05	1.77707e-05		50.5668
		0.0021129	0.00201724	0.00250366	0.000431795	1	7.26102e-06	0.00183671	0.00197982	2.39178e-05	2.70648e-05	1.17958e-05	1.13766e-05	1.11748e-05	1.74093e-05		50.5645
		0.00183402	0.00192582	0.00238078	0.000356282	1	6.12552e-06	0.00137851	0.00197558	2.73435e-05	2.53719e-05	1.10925e-05	6.41876e-06	1.08371e-05	1.38428e-05		50.5622
		0.00191021	0.0018359	0.00251464	0.00036166	1	4.85372e-06	0.00141233	0.0019819	2.54365e-05	2.65015e-05	7.43511e-06	1.07712e-05	1.37783e-05	1.67825e-05		50.56
		0.00202969	0.00190045	0.00249178	0.000405799	1	6.37059e-06	0.00132407	0.00174862	2.62841e-05	2.49216e-05	1.06627e-05	1.30264e-05	9.25922e-06	1.5451e-05		50.5577
		0.00197925	0.00206838	0.00247401	0.000342011	1	8.44712e-06	0.00132783	0.0019567	2.61408e-05	2.55427e-05	1.41494e-05	1.56831e-05	1.07792e-05	1.80689e-05		50.5555
		0.00183256	0.00197569	0.00259819	0.000422627	1	6.04001e-06	0.00132224	0.00170963	3.53717e-05	2.61894e-05	1.41307e-05	1.15762e-05	1.29611e-05	1.77609e-05		50.5532
		0.00202518	0.00193577	0.00275049	0.00037227	1	7.21434e-06	0.00140377	0.00209846	2.48656e-05	2.84787e-05	1.57833e-05	1.40397e-05	1.3469e-05	1.78699e-05		50.551
		0.00198728	0.00213946	0.00281591	0.000381032	1	6.32405e-06	0.00145986	0.00221671	2.45625e-05	2.95585e-05	8.61757e-06	1.42597e-05	1.37897e-05	1.60682e-05		50.5487
		0.00202234	0.00191069	0.00291737	0.000386178	1	6.38849e-06	0.00146216	0.00202751	3.40717e-05	2.93146e-05	3.65517e-06	1.91437e-05	1.00107e-05	1.65698e-05		50.5464
		0.00196987	0.00192738	0.00300833	0.000382508	1	8.00794e-06	0.00155498	0.00207829	3.03354e-05	2.64628e-05	1.57897e-05	1.40453e-05	1.2288e-05	1.62659e-05		50.5442
		0.00191187	0.00200676	0.00313247	0.000427643	1	8.68695e-06	0.00167768	0.00218788	3.09948e-05	3.12609e-05	1.73764e-05	1.07627e-05	1.12328e-05	1.60209e-05		50.5419
		0.0017978	0.00182821	0.00297227	0.000377523	1	8.00815e-06	0.00151983	0.0021787	2.02809e-05	2.96312e-05	1.18467e-05	1.09656e-05	1.17818e-05	1.88765e-05		50.5397
		0.00204108	0.001928	0.00310371	0.000384299	1	5.78347e-06	0.00159367	0.00211005	2.99044e-05	2.74736e-05	9.78724e-06	7.79009e-06	1.27185e-05	1.61085e-05		50.5374
		0.00191165	0.00190154	0.00304344	0.000376529	1	9.18888e-06	0.00178546	0.00221015	2.96361e-05	3.74417e-05	1.21319e-05	9.82585e-06	1.29278e-05	1.49394e-05		50.5351
		0.0020101	0.00197142	0.00331445	0.000384488	1	6.33665e-06	0.00177314	0.00204613	2.21769e-05	2.91548e-05	1.9468e-05	9.14191e-06	1.04694e-05	1.74621e-05		50.5329
		0.00197108	0.00205313	0.00338191	0.00046375	1	8.45135e-06	0.0019453	0.00258801	3.75706e-05	3.34405e-05	7.4889e-06	1.44659e-05	1.51e-05	2.08264e-05		50.5306
		0.00187888	0.00181578	0.00336964	0.000382169	1	8.0996e-06	0.00188765	0.00232146	3.30361e-05	3.40766e-05	2.30714e-05	1.8945e-05	1.26004e-05	1.77149e-05		50.5284
		0.00192445	0.00194914	0.00355316	0.000427611	1	7.37417e-06	0.00193702	0.00259578	3.77889e-05	3.36348e-05	1.2575e-05	1.67327e-05	1.49643e-05	1.80642e-05		50.5261
		0.00185836	0.00177304	0.00317177	0.000383855	1	7.78336e-06	0.00171102	0.00247308	3.8955e-05	3.33455e-05	1.16545e-05	1.3485e-05	1.17978e-05	1.6742e-05		50.5238
		0.00204288	0.00182255	0.00334551	0.000442659	1	8.43428e-06	0.00181519	0.00232425	3.70484e-05	3.28964e-05	1.48005e-05	9.98511e-06	1.36851e-05	1.69664e-05		50.5216
		0.00198743	0.00199308	0.00363642	0.00043969	1	7.50551e-06	0.00195341	0.00258703	3.50746e-05	3.7266e-05	1.09099e-05	1.05222e-05	1.11973e-05	1.77112e-05		50.5193
		0.00199718	0.0019302	0.0034699	0.000443649	1	1.06775e-05	0.00181515	0.00242756	2.79598e-05	3.33945e-05	1.13425e-05	1.31275e-05	1.09693e-05	2.14561e-05		50.517
		0.00195488	0.00201454	0.00336462	0.000405229	1	8.88193e-06	0.00173491	0.00235784	4.14228e-05	3.63344e-05	1.36353e-05	7.88623e-06	1.32058e-05	1.43636e-05		50.5148
		0.00192335	0.00203211	0.00337397	0.000417016	1	9.62169e-06	0.00175202	0.00241954	4.04418e-05	3.57644e-05	6.13779e-06	9.25513e-06	1.27857e-05	1.90149e-05		50.5125
		0.00197845	0.0019923	0.00345629	0.000384674	1	1.12046e-05	0.00176237	0.00236528	3.37615e-05	3.602e-05	1.36369e-05	1.00384e-05	1.35378e-05	1.88517e-05		50.5103
		0.00204138	0.00193966	0.00337381	0.000382935	1	8.3811e-06	0.00166715	0.00222653	3.63818e-05	0.000128745	1.33205e-05	1.12063e-05	1.12875e-05	1.65151e-05		50.508
		0.00185404	0.00189485	0.00343296	0.000372151	1	7.49661e-06	0.00171977	0.00242706	3.34298e-05	3.71655e-05	4.89068e-06	1.349e-05	1.19873e-05	1.71855e-05		50.5057
		0.00197736	0.00190086	0.00340739	0.00033831	1	7.9917e-06	0.00168987	0.00258547	4.01193e-05	3.56976e-05	1.74018e-05	1.14971e-05	1.35667e-05	1.64939e-05		50.5035
		0.00200668	0.00198671	0.00351947	0.000416573	1	9.20088e-06	0.00176208	0.00219527	3.24357e-05	3.87673e-05	1.14211e-05	9.5464e-06	1.3752e-05	1.60905e-05		50.5012
		0.00183538	0.00175626	0.00331394	0.000382619	1	9.80197e-06	0.00165165	0.0022586	3.48343e-05	3.44277e-05	9.81872e-06	1.20783e-05	1.07955e-05	1.63085e-05		50.499
		0.00181159	0.00176558	0.00325304	0.000410906	1	5.6505e-06	0.00162992	0.00215207	4.57024e-05	3.69777e-05	1.38767e-05	1.31337e-05	1.09745e-05	1.72047e-05		50.4967
		0.00192068	0.00176949	0.00316374	0.000382298	1	6.65003e-06	0.00150826	0.00212523	4.40747e-05	3.75661e-05	1.14781e-05	1.62368e-05	1.12138e-05	1.40162e-05		50.4944
		0.00183898	0.00191368	0.00309471	0.000453188	1	7.91951e-06	0.00150975	0.00199529	3.38577e-05	3.90953e-05	1.16651e-05	1.20007e-05	1.05904e-05	1.47138e-05		50.4922
		0.00179565	0.00176619	0.0032854	0.000376765	1	4.8914e-06	0.00145842	0.00220193	4.12628e-05	3.99189e-05	7.65212e-06	1.25638e-05	1.00947e-05	1.5731e-05		50.4899
		0.00174949	0.00177836	0.00413756	0.000370499	1	6.95647e-06	0.00146095	0.00213598	3.75031e-05	3.88285e-05	1.56477e-05	8.35108e-06	1.00401e-05	1.61197e-05		50.4877
		0.00169366	0.00161861	0.00285576	0.000315171	1	5.49714e-06	0.00149078	0.0020026	3.47439e-05	4.00958e-05	8.73846e-06	9.39851e-06	1.10963e-05	1.70475e-05		50.4854
		0.00172142	0.0017971	0.00284352	0.000329137	1	7.03643e-06	0.00144062	0.00207861	4.32577e-05	5.34706e-05	1.00101e-05	7.24312e-06	1.18957e-05	1.60221e-05		50.4831
		0.00183391	0.0017962	0.0029288	0.000360728	1	8.16436e-06	0.00144364	0.00197047	4.94614e-05	4.24742e-05	1.28518e-05	6.69126e-06	1.34665e-05	1.6291e-05		50.4809
		0.00183085	0.00176698	0.00317794	0.000321332	1	7.93225e-06	0.00149711	0.00196104	4.85163e-05	3.84902e-05	9.08019e-06	1.27713e-05	1.29146e-05	1.27012e-05		50.4786
		0.00167012	0.00170013	0.00308212	0.000382488	1	7.09945e-06	0.0014981	0.00220114	3.4132e-05	3.76525e-05	8.58457e-06	1.56258e-05	1.1119e-05	1.61548e-05		50.4764
		0.00182993	0.00172484	0.00318997	0.000367665	1	7.74763e-06	0.00146616	0.00214298	3.69098e-05	4.29772e-05	6.24266e-06	1.15858e-05	1.22257e-05	1.52621e-05		50.4741
		0.00165961	0.00175112	0.00305909	0.000358736	1	6.14248e-06	0.00145811	0.00208806	4.6188e-05	3.66431e-05	6.1658e-06	1.35889e-05	1.17457e-05	1.50742e-05		50.4718
		0.00193363	0.00181463	0.0031111	0.000391514	1	7.53272e-06	0.00146324	0.00194764	4.53791e-05	4.09932e-05	8.62284e-06	1.14146e-05	1.18259e-05	1.86075e-05		50.4696
		0.00170962	0.0016812	0.00281015	0.00037986	1	7.33592e-06	0.00139535	0.00189676	4.89214e-05	3.6755e-05	8.39757e-06	1.45906e-05	9.1699e-06	1.52233e-05		50.4673
		0.00159583	0.00169099	0.00277309	0.000386927	1	9.0613e-06	0.00140824	0.00193781	3.46059e-05	3.86148e-05	1.55616e-05	1.45346e-05	1.15791e-05	1.41546e-05		50.4651
		0.00171115	0.00163243	0.00289373	0.000398764	1	9.72668e-06	0.00137226	0.0020167	4.16794e-05	3.68433e-05	1.44826e-05	6.97886e-06	9.85422e-06	1.38366e-05		50.4628
		0.0018038	0.00175241	0.00281758	0.000326448	1	9.52434e-06	0.00142879	0.00187095	3.65316e-05	3.62915e-05	9.54061e-06	9.66498e-06	1.05957e-05	1.41189e-05		50.4605
		0.00151416	0.00162462	0.00278719	0.000427507	1	1.21781e-05	0.00132984	0.00200441	3.96661e-05	3.31913e-05	1.66263e-05	1.09847e-05	9.79919e-06	1.61885e-05		50.4583
		0.00175577	0.00171861	0.00274453	0.000314597	1	9.06428e-06	0.00118788	0.00168299	2.45243e-05	3.60874e-05	1.55667e-05	1.45394e-05	1.0626e-05	1.67582e-05		50.456
		0.00168998	0.00176194	0.00270421	0.0003659	1	1.16521e-05	0.00133191	0.0018463	3.87601e-05	3.94825e-05	2.28162e-05	1.46498e-05	1.13546e-05	1.6355e-05		50.4538
		0.00162185	0.00162545	0.00256956	0.000363805	1	1.06636e-05	0.00116454	0.00172794	3.60848e-05	3.5641e-05	1.34637e-05	1.20347e-05	1.15175e-05	1.4921e-05		50.4515
		0.00174572	0.00169703	0.00267254	0.000397844	1	9.43991e-06	0.00126135	0.00181432	4.77285e-05	3.75161e-05	1.44919e-05	8.38167e-06	1.1227e-05	1.57427e-05		50.4492
		0.00174541	0.00177267	0.00246991	0.000362788	1	1.02726e-05	0.0011476	0.00171352	4.59153e-05	3.55014e-05	1.41611e-05	1.04243e-05	1.22285e-05	1.3986e-05		50.447
		0.00157715	0.00149231	0.00212532	0.000341102	1	9.2334e-06	0.000782416	0.00173174	3.85325e-05	3.28026e-05	1.02008e-05	9.18236e-06	9.8652e-06	1.88859e-05		50.4447
		0.00175322	0.00169468	0.00247318	0.000416264	1	8.35519e-06	0.000889636	0.00163327	3.92567e-05	3.36401e-05	5.11022e-06	1.55795e-05	1.08166e-05	1.65645e-05		50.4425
		0.00166358	0.0017572	0.00238168	0.000366193	1	9.32623e-06	0.00120216	0.00184806	3.10816e-05	3.45232e-05	8.89693e-06	1.25135e-05	1.14105e-05	1.35192e-05		50.4402
		0.00181346	0.00169777	0.00252331	0.000323906	1	9.63708e-06	0.00131219	0.00191412	3.39431e-05	3.79588e-05	1.27237e-05	6.62454e-06	1.43497e-05	1.5361e-05		50.4379
		0.00171719	0.00193583	0.00262519	0.000395652	1	1.27956e-05	0.00133801	0.00186432	3.7448e-05	3.66715e-05	7.90839e-06	1.60401e-05	1.39514e-05	2.0559e-05		50.4357
		0.00171708	0.00177735	0.0025194	0.000367187	1	9.14375e-06	0.00136383	0.00189723	3.04486e-05	3.42068e-05	1.02001e-05	1.40238e-05	1.12148e-05	1.69419e-05		50.4334
		0.00181991	0.00176458	0.00252432	0.00037159	1	1.07086e-05	0.00140512	0.00198102	4.20501e-05	5.09856e-05	1.17134e-05	1.50632e-05	1.37569e-05	1.49318e-05		50.4312
		0.00177771	0.00192821	0.00239743	0.000347382	1	7.96387e-06	0.00135113	0.00194296	4.51748e-05	3.52402e-05	1.15762e-05	1.04204e-05	1.24526e-05	1.64642e-05		50.4289
		0.00177693	0.00173319	0.00253529	0.000394632	1	1.0688e-05	0.00127016	0.00189832	3.6501e-05	4.05671e-05	1.51488e-05	1.02201e-05	1.13164e-05	1.72134e-05		50.4266
		0.00177219	0.00176194	0.00247627	0.00035918	1	1.10363e-05	0.00127897	0.00171819	4.31373e-05	3.38561e-05	9.0243e-06	1.11993e-05	1.13446e-05	1.55809e-05		50.4244
		0.00195895	0.00178749	0.00255914	0.000391147	1	1.3673e-05	0.00138348	0.0018876	4.52219e-05	3.88416e-05	1.23814e-05	1.83108e-05	1.07517e-05	1.66134e-05		50.4221
		0.00184723	0.00182966	0.0025028	0.000371857	1	1.55516e-05	0.00141778	0.00201654	3.63477e-05	4.1857e-05	6.39131e-06	8.15469e-06	1.3997e-05	1.77901e-05		50.4198
		0.00190669	0.00171039	0.00269426	0.000452136	1	2.16327e-05	0.00136263	0.00195416	3.87385e-05	3.8458e-05	1.2891e-05	1.34239e-05	9.49944e-06	1.82071e-05		50.4176
		0.00195545	0.00202725	0.00267742	0.000382439	1	1.83346e-05	0.00170105	0.00199247	4.02641e-05	4.29024e-05	6.68255e-06	1.1627e-05	1.17778e-05	1.68225e-05		50.4153
		0.00206495	0.00195184	0.00249588	0.000361547	1	2.29811e-05	0.00126296	0.00188577	4.95737e-05	4.33994e-05	9.00695e-06	1.34135e-05	1.28104e-05	1.6328e-05		50.4131
		0.00167152	0.00159827	0.00213255	0.00036978	1	1.83593e-05	0.00109707	0.00152121	3.96084e-05	3.28579e-05	1.20528e-05	4.18346e-06	9.73824e-06	1.39695e-05		50.4108
		0.00190251	0.0019315	0.00228637	0.000388244	1	2.13822e-05	0.0012092	0.00210771	4.3649e-05	4.31586e-05	9.13134e-06	1.20877e-05	1.17112e-05	1.38754e-05		50.4085
		0.00185321	0.00180929	0.00218936	0.000457706	1	1.61438e-05	0.00110208	0.00151568	3.53237e-05	3.56176e-05	6.33689e-06	2.05824e-05	1.06043e-05	1.35e-05		50.4063
		0.00198017	0.00186455	0.00212942	0.000366554	1	1.32227e-05	0.00117096	0.00160817	3.09844e-05	3.7677e-05	1.52271e-05	1.10067e-05	1.02481e-05	1.25589e-05		50.404
		0.00190483	0.0019159	0.00203263	0.000406728	1	1.01291e-05	0.0011635	0.00163606	3.22635e-05	3.43344e-05	9.45283e-06	1.40775e-05	1.06825e-05	1.12658e-05		50.4018
		0.00181883	0.00172109	0.00195861	0.000298354	1	1.04249e-05	0.000877146	0.00194715	2.92682e-05	3.2922e-05	1.31963e-05	1.14513e-05	8.31797e-06	1.57724e-05		50.3995
		0.00184267	0.00189433	0.00186031	0.000383601	1	8.89815e-06	0.00124112	0.0016791	2.66539e-05	3.46221e-05	1.95265e-05	7.52432e-06	1.24731e-05	1.52319e-05		50.3972
		0.00187668	0.00190321	0.001849	0.000419107	1	6.52966e-06	0.00110303	0.00168675	3.32308e-05	3.41174e-05	6.34648e-06	8.83366e-06	8.58588e-06	1.2753e-05		50.395
		0.00213689	0.00211938	0.00187573	0.0003743	1	7.14511e-06	0.000918904	0.00180559	4.41923e-05	3.51855e-05	8.34061e-06	1.53055e-05	1.05082e-05	1.26114e-05		50.3927
		0.0021746	0.00196257	0.00204256	0.000387875	1	6.69777e-06	0.000883137	0.00166257	3.71797e-05	3.68297e-05	8.3482e-06	9.67507e-06	8.90859e-06	1.0942e-05		50.3905
		0.00190541	0.00181276	0.00165175	0.000333521	1	4.03785e-06	0.000835927	0.00143534	3.55217e-05	3.74788e-05	1.30406e-05	1.13162e-05	8.56727e-06	1.21256e-05		50.3882
		0.00197371	0.001889	0.0016804	0.000469093	1	8.08689e-06	0.000788036	0.00170167	4.80768e-05	3.30976e-05	1.04452e-05	6.80213e-06	8.35111e-06	1.21481e-05		50.386
		0.00205248	0.00194995	0.00169135	0.000434441	1	1.13871e-05	0.000743637	0.00158112	3.07385e-05	3.32464e-05	9.2233e-06	1.22094e-05	1.07746e-05	1.11514e-05		50.3837
		0.00218206	0.00206042	0.00156235	0.000388861	1	1.13998e-05	0.000711442	0.00152054	1.77243e-05	3.32915e-05	7.41987e-06	1.14659e-05	1.06686e-05	1.4357e-05		50.3814
		0.00221161	0.00213154	0.00143012	0.000409147	1	1.44811e-05	0.000747474	0.00158492	3.4843e-05	3.54469e-05	1.02266e-05	9.61986e-06	1.05622e-05	1.0814e-05		50.3792
		0.00199016	0.00196862	0.00167231	0.000462504	1	1.10785e-05	0.000662952	0.00161187	3.53444e-05	3.18798e-05	1.2713e-05	9.56094e-06	1.11751e-05	7.37501e-06		50.3769
		0.00210587	0.00214883	0.001602	0.000446182	1	6.78087e-06	0.000777604	0.00148358	3.27277e-05	3.01429e-05	3.82001e-06	6.66843e-06	1.02346e-05	1.00557e-05		50.3746
		0.00219937	0.00200753	0.00132771	0.000485969	1	6.27458e-06	0.000667278	0.00147503	3.59405e-05	3.19556e-05	9.93362e-06	8.62541e-06	1.09218e-05	1.12534e-05		50.3724
		0.00220935	0.00204907	0.00143444	0.000409139	1	4.30492e-06	0.000675768	0.00148529	2.78575e-05	3.0908e-05	1.25991e-06	8.20057e-06	9.95424e-06	1.12055e-05		50.3701
		0.00194083	0.0020583	0.0013501	0.000428228	1	5.26364e-06	0.000680404	0.0016069	3.12496e-05	3.18526e-05	1.07666e-05	5.53789e-06	1.06249e-05	1.09823e-05		50.3679
		0.00237147	0.00226076	0.00172733	0.000426254	1	4.91988e-06	0.000705493	0.00179959	3.21107e-05	3.10655e-05	8.98472e-06	1.48673e-05	9.92518e-06	9.15837e-06		50.3656
		0.00197725	0.00208139	0.00144906	0.000424943	1	4.73522e-06	0.000665	0.00156086	3.09055e-05	3.26015e-05	6.16799e-06	1.14472e-05	9.11328e-06	8.51635e-06		50.3633
		0.00212572	0.00204778	0.00166569	0.000425688	1	4.29875e-06	0.000749796	0.00141891	2.78622e-05	2.9484e-05	1.00435e-05	7.26728e-06	9.03407e-06	8.80238e-06		50.3611
		0.00191926	0.00205639	0.00148785	0.000388211	1	6.19816e-06	0.000728827	0.00144291	2.92919e-05	2.88852e-05	6.1214e-06	1.06506e-05	7.73636e-06	7.86003e-06		50.3588
		0.0019384	0.00190413	0.00153715	0.000376397	1	6.91941e-06	0.000707485	0.00127424	1.99235e-05	2.73892e-05	6.97111e-06	1.07724e-05	6.40554e-06	6.75132e-06		50.3566
		0.00218139	0.00213278	0.00158985	0.000396119	1	6.04104e-06	0.000727061	0.00155557	3.31188e-05	3.15829e-05	9.72059e-06	6.33024e-06	6.15219e-06	1.05722e-05		50.3543
		0.00216531	0.00209786	0.00161803	0.000423588	1	6.24702e-06	0.000814953	0.00175392	2.46544e-05	2.64113e-05	1.23703e-05	6.44055e-06	8.12692e-06	8.66784e-06		50.352
		0.00232299	0.00211958	0.00164047	0.000434428	1	3.86136e-06	0.000696327	0.00168901	3.11645e-05	2.75865e-05	6.21966e-06	2.88562e-06	1.04081e-05	7.38473e-06		50.3498
		0.0020959	0.00198679	0.00160528	0.000418084	1	6.3645e-06	0.000666104	0.00128545	2.51181e-05	3.07129e-05	5.02233e-06	6.56167e-06	9.17523e-06	7.91901e-06		50.3475
		0.00226476	0.00221238	0.00165831	0.000425306	1	5.04945e-06	0.000766077	0.00165958	3.22703e-05	3.0971e-05	6.44037e-06	9.71139e-06	9.05696e-06	7.17968e-06		50.3453
		0.002218	0.00207171	0.00164694	0.000409421	1	5.56997e-06	0.00070749	0.0014848	1.81582e-05	2.92078e-05	8.53821e-06	1.0596e-05	6.93764e-06	7.52528e-06		50.343
		0.00227951	0.0021947	0.00170916	0.000423615	1	4.17679e-06	0.000751771	0.00388968	4.06736e-05	3.0984e-05	3.82226e-06	8.89661e-06	8.1918e-06	8.67074e-06		50.3407
		0.0021595	0.00213999	0.00180843	0.0003581	1	4.70165e-06	0.000767359	0.00180777	3.20582e-05	2.88009e-05	3.74186e-06	7.98365e-06	8.01948e-06	8.18577e-06		50.3385
		0.002279	0.00221684	0.00195517	0.000400245	1	6.18426e-06	0.000776968	0.00155331	3.09114e-05	2.69358e-05	7.57976e-06	1.02487e-05	7.86381e-06	8.40887e-06		50.3362
		0.00235662	0.00224695	0.00203112	0.000408761	1	4.93624e-06	0.000755384	0.00151797	2.88177e-05	2.87059e-05	1.48456e-05	8.58465e-06	7.68491e-06	8.3667e-06		50.334
		0.00234443	0.00227114	0.00194324	0.000381736	1	5.49955e-06	0.000805742	0.00174731	3.32658e-05	2.95697e-05	1.14612e-05	5.89519e-06	9.04747e-06	7.85043e-06		50.3317
		0.0022798	0.00221143	0.0019321	0.000456831	1	5.74878e-06	0.000821794	0.00148369	2.31083e-05	2.7064e-05	6.51818e-06	7.56047e-06	7.54145e-06	7.73917e-06		50.3294
		0.00210542	0.00214234	0.00172746	0.000423359	1	5.71907e-06	0.000758213	0.00131492	2.56926e-05	2.71709e-05	1.37944e-05	7.97828e-06	5.89871e-06	7.27319e-06		50.3272
		0.0022789	0.00216143	0.00189048	0.000426078	1	5.79493e-06	0.000745229	0.00148041	2.99596e-05	2.75351e-05	9.21183e-06	5.3347e-06	9.82501e-06	9.70759e-06		50.3249
		0.00232864	0.00219293	0.00182293	0.000360958	1	6.05226e-06	0.000688213	0.00147329	2.79318e-05	2.66457e-05	6.28108e-06	8.74262e-06	8.2737e-06	8.82438e-06		50.3227
		0.00229428	0.00222633	0.00179986	0.000364689	1	6.09225e-06	0.000762875	0.00155176	2.27423e-05	3.15801e-05	7.46698e-06	1.08174e-05	6.63979e-06	6.02915e-06		50.3204
		0.00245946	0.00240549	0.0019332	0.000403044	1	6.87576e-06	0.000740944	0.00166595	2.83684e-05	2.88694e-05	7.66152e-06	7.39931e-06	7.15352e-06	7.5742e-06		50.3181
		0.00227963	0.0022604	0.00182946	0.00030196	1	5.7032e-06	0.000751738	0.00153474	2.49184e-05	2.88623e-05	2.00235e-05	1.44664e-05	1.58783e-05	7.10225e-06		50.3159
		0.00218131	0.00221432	0.00179025	0.000337253	1	4.0829e-06	0.000782363	0.00157783	8.82913e-05	2.9314e-05	1.34475e-05	2.33355e-05	1.58479e-05	7.67979e-06		50.3136
		0.00236496	0.00241961	0.00186916	0.000421023	1	5.46849e-06	0.000745476	0.00160057	3.14139e-05	2.80186e-05	5.24539e-06	1.21837e-05	1.18042e-05	6.04884e-06		50.3113
		0.00239727	0.00241932	0.00179543	0.000370918	1	6.45672e-06	0.00076757	0.00140785	3.4667e-05	2.82459e-05	3.8758e-06	1.20286e-05	6.57551e-06	7.22523e-06		50.3091
		0.00242674	0.00210154	0.00170079	0.000350725	1	5.01335e-06	0.000717466	0.00168468	3.42021e-05	2.61381e-05	5.10914e-06	9.64196e-06	7.7397e-06	6.81917e-06		50.3068
		0.00234503	0.00212613	0.00164539	0.00039278	1	5.48675e-06	0.000711619	0.00141075	3.45545e-05	2.84038e-05	6.4602e-06	7.49322e-06	7.70442e-06	8.13888e-06		50.3046
		0.00240068	0.0024761	0.00179351	0.0004343	1	5.16502e-06	0.000694042	0.00163619	3.44428e-05	2.87182e-05	6.87395e-06	9.56783e-06	7.95307e-06	7.49685e-06		50.3023
		0.00198696	0.00218844	0.00154585	0.000300917	1	5.05223e-06	0.000615371	0.00152081	2.69716e-05	2.72917e-05	4.84612e-06	5.62792e-06	6.47733e-06	7.34789e-06		50.3
		0.002409	0.00246406	0.00177426	0.000395144	1	4.39924e-06	0.000723933	0.00152375	2.4478e-05	2.90239e-05	8.29243e-06	1.20132e-05	8.72613e-06	8.19792e-06		50.2978
		0.00247382	0.00243257	0.00153903	0.000352624	1	5.69511e-06	0.000693158	0.00167602	3.17974e-05	2.99425e-05	6.97354e-06	7.27974e-06	6.57837e-06	9.46003e-06		50.2955
		0.00239107	0.0022667	0.00138691	0.000339031	1	4.74964e-06	0.000684444	0.00146331	2.58206e-05	3.24044e-05	1.29554e-05	5.99569e-06	9.43185e-06	5.6412e-06		50.2933
		0.00228357	0.00226441	0.00135752	0.000364976	1	5.53258e-06	0.000703858	0.00155118	3.35534e-05	2.92775e-05	6.27304e-06	1.01868e-05	9.60365e-06	5.77997e-06		50.291
		0.00229646	0.00222968	0.0013615	0.000349983	1	6.98158e-06	0.000660566	0.00143766	2.90946e-05	3.2904e-05	2.53326e-06	6.66096e-06	5.56482e-06	5.41651e-06		50.2888
		0.00222235	0.00220001	0.00134248	0.000358994	1	5.4178e-06	0.000604937	0.00121607	3.19629e-05	2.87862e-05	8.94335e-06	8.13899e-06	7.38043e-06	6.95706e-06		50.2865
		0.00234462	0.00219401	0.00139016	0.000367241	1	6.41942e-06	0.00064209	0.00132523	2.72027e-05	3.20666e-05	6.44379e-06	6.72673e-06	7.68485e-06	9.36458e-06		50.2842
		0.00224442	0.00222161	0.00130868	0.000326821	1	5.92706e-06	0.000626435	0.00141703	3.34683e-05	2.77527e-05	4.99952e-06	6.53188e-06	6.34815e-06	7.88305e-06		50.282
		0.00230689	0.00232063	0.00143988	0.000339626	1	4.73828e-06	0.000642725	0.00134818	2.70869e-05	3.16172e-05	6.59241e-06	6.11718e-06	7.39256e-06	7.66791e-06		50.2797
		0.00235479	0.00240951	0.00134336	0.000327869	1	6.5653e-06	0.000609384	0.00146091	2.59106e-05	3.46059e-05	3.87744e-06	6.01657e-06	6.92464e-06	8.3256e-06		50.2775
		0.00255131	0.00258342	0.00148033	0.000336123	1	5.58971e-06	0.000700711	0.00144987	4.11884e-05	3.13186e-05	6.71038e-06	1.0897e-05	6.33012e-06	7.64289e-06		50.2752
		0.00245001	0.00234612	0.00144698	0.000364066	1	7.20208e-06	0.000840647	0.00151299	4.01149e-05	3.11414e-05	8.14854e-06	5.50865e-06	9.29961e-06	8.05567e-06		50.2729
		0.00241489	0.00256672	0.0015305	0.000346397	1	5.73717e-06	0.000709016	0.00210004	3.53701e-05	2.96132e-05	8.11287e-06	8.61877e-06	6.252e-06	9.0003e-06		50.2707
		0.00239482	0.00224638	0.00138431	0.000302613	1	4.35689e-06	0.000695326	0.00171381	2.81938e-05	2.86002e-05	6.50487e-06	4.52695e-06	6.48369e-06	9.29607e-06		50.2684
		0.00227841	0.00229791	0.00144822	0.000389459	1	6.29547e-06	0.000777447	0.00159292	3.27369e-05	2.65387e-05	7.84677e-06	5.30464e-06	8.14082e-06	7.28348e-06		50.2662
		0.00240485	0.0022891	0.00150951	0.000365473	1	6.17615e-06	0.000812109	0.00142578	2.72595e-05	2.99387e-05	5.30097e-06	9.23442e-06	8.26658e-06	7.2356e-06		50.2639
		0.00237321	0.00238724	0.0014522	0.00032686	1	6.28772e-06	0.000749976	0.00174186	2.75474e-05	2.74303e-05	5.2139e-06	8.32582e-06	8.71179e-06	6.959e-06		50.2616
		0.00243856	0.00238513	0.0014972	0.000336662	1	6.19801e-06	0.000744789	0.00169253	3.71131e-05	3.03877e-05	6.65789e-06	9.2671e-06	6.16208e-06	9.67573e-06		50.2594
		0.00242377	0.00233267	0.00173768	0.00034124	1	5.62566e-06	0.000731722	0.00139287	3.02024e-05	2.79288e-05	6.62374e-06	9.21958e-06	8.60713e-06	5.62275e-06		50.2571
		0.00233638	0.00239247	0.00167653	0.000351165	1	5.88113e-06	0.000771848	0.00152314	2.42462e-05	2.83549e-05	7.72279e-06	1.04421e-05	8.24119e-06	7.47929e-06		50.2548
		0.00239251	0.00243493	0.00186286	0.000348382	1	8.02438e-06	0.00076392	0.00168784	2.614e-05	3.16763e-05	1.07903e-05	1.01501e-05	9.46606e-06	1.02706e-05		50.2526
		0.00269165	0.002588	0.00184615	0.000371008	1	7.70889e-06	0.000796419	0.0018209	3.25648e-05	3.45427e-05	5.31241e-06	1.00256e-05	7.45571e-06	7.41195e-06		50.2503
		0.00259758	0.00257597	0.00194903	0.000355707	1	7.23302e-06	0.000697409	0.00163321	2.52939e-05	3.33361e-05	7.82266e-06	9.82153e-06	8.69572e-06	1.00957e-05		50.2481
		0.00261972	0.00264002	0.00213379	0.000338507	1	7.47292e-06	0.000822016	0.00165527	2.50068e-05	3.60794e-05	1.06311e-05	1.23083e-05	9.9169e-06	1.10813e-05		50.2458
		0.00262967	0.00256684	0.00199454	0.000368815	1	7.45329e-06	0.000758893	0.00175808	3.81943e-05	3.08103e-05	5.06496e-06	6.61737e-06	8.12428e-06	9.21233e-06		50.2435
		0.0026131	0.00263882	0.00218908	0.000374099	1	8.71281e-06	0.000788598	0.00169554	3.54074e-05	3.29187e-05	6.3519e-06	1.17885e-05	1.1987e-05	9.99897e-06		50.2413
		0.00259163	0.00249346	0.00212279	0.000330682	1	8.02748e-06	0.000795724	0.00161672	3.58417e-05	2.94955e-05	1.517e-05	9.50327e-06	9.87299e-06	8.09237e-06		50.239
		0.00257997	0.0026923	0.00204151	0.000347096	1	9.76093e-06	0.000867686	0.00156908	3.9148e-05	3.2333e-05	7.80333e-06	1.20584e-05	1.0757e-05	1.10134e-05		50.2368
		0.00231329	0.00241052	0.00209304	0.000380599	1	8.2368e-06	0.000824965	0.00182248	3.5591e-05	3.15265e-05	6.38484e-06	5.92458e-06	9.09258e-06	1.02052e-05		50.2345
		0.0025054	0.00259621	0.00218107	0.000376339	1	7.51314e-06	0.00118096	0.00189783	2.91363e-05	2.85063e-05	1.15275e-05	9.63533e-06	9.78259e-06	8.8228e-06		50.2322
		0.0024252	0.00244211	0.00226038	0.000359695	1	9.52312e-06	0.00119623	0.00213823	2.22534e-05	2.73148e-05	8.0507e-06	1.01078e-05	1.07398e-05	1.12005e-05		50.23
		0.00260843	0.0026089	0.00236233	0.000418512	1	9.19001e-06	0.00198851	0.00185039	3.13044e-05	2.92847e-05	1.07398e-05	1.39886e-05	1.14502e-05	1.16807e-05		50.2277
		0.00256638	0.00247955	0.00230143	0.000421894	1	8.03327e-06	0.00128379	0.00160836	2.87077e-05	2.87727e-05	1.44406e-05	1.04382e-05	1.23903e-05	1.08946e-05		50.2255
		0.00268247	0.00257621	0.00242658	0.000425405	1	7.92945e-06	0.00123928	0.00195723	3.99937e-05	3.044e-05	1.70505e-05	7.74445e-06	1.25359e-05	9.11457e-06		50.2232
		0.0027345	0.00277483	0.00244213	0.000482045	1	8.3836e-06	0.00136348	0.0019754	2.64308e-05	3.50293e-05	1.25533e-05	1.30723e-05	1.51616e-05	1.37924e-05		50.2209
		0.00291116	0.00254535	0.00263402	0.000480786	1	1.07445e-05	0.0013616	0.00191889	2.59601e-05	3.63873e-05	9.8576e-06	1.14128e-05	1.48916e-05	1.17622e-05		50.2187
		0.00257884	0.00259029	0.00260983	0.000508865	1	8.71547e-06	0.00152651	0.001974	4.0412e-05	3.50142e-05	1.18904e-05	1.03181e-05	1.341e-05	9.76551e-06		50.2164
		0.00256882	0.00249255	0.00279128	0.000491364	1	8.89926e-06	0.00147458	0.0019307	2.96817e-05	3.52809e-05	8.30508e-06	1.23683e-05	1.35007e-05	1.31929e-05		50.2142
		0.00288817	0.00293743	0.00290204	0.000521713	1	1.02968e-05	0.00152391	0.00208839	3.1064e-05	3.19695e-05	1.09381e-05	9.84605e-06	1.30624e-05	1.26236e-05		50.2119
		0.00275688	0.00262322	0.00276255	0.000556303	1	9.32087e-06	0.00162743	0.00219919	2.89189e-05	2.94371e-05	1.14415e-05	1.69208e-05	1.42285e-05	1.51988e-05		50.2096
		0.00283715	0.0026259	0.00296014	0.000513382	1	8.87184e-06	0.00158238	0.00183121	3.53245e-05	3.09365e-05	1.16681e-05	8.25232e-06	1.45103e-05	1.44047e-05		50.2074
		0.00273945	0.00258269	0.00277618	0.000524498	1	1.01026e-05	0.001585	0.00224854	1.97362e-05	2.90288e-05	8.94215e-06	1.3317e-05	1.02189e-05	1.45135e-05		50.2051
		0.00266776	0.00259601	0.00293176	0.000513417	1	9.25022e-06	0.00153597	0.00205539	3.82025e-05	2.96395e-05	1.18828e-05	9.16828e-06	1.466e-05	1.27581e-05		50.2029
		0.00274053	0.00255148	0.00271132	0.000527886	1	1.15306e-05	0.00145193	0.00238936	3.07177e-05	2.9299e-05	8.99993e-06	1.34031e-05	1.23431e-05	1.07261e-05		50.2006
		0.00256975	0.00266096	0.00283953	0.000487403	1	1.01363e-05	0.00152898	0.00231449	3.73544e-05	3.02064e-05	1.34253e-05	1.12946e-05	1.28941e-05	1.26706e-05		50.1983
		0.00270124	0.00260761	0.00265578	0.000498357	1	1.00532e-05	0.00161111	0.00213482	3.46659e-05	2.61728e-05	1.22218e-05	9.1915e-06	1.32407e-05	1.41654e-05		50.1961
		0.00263102	0.00266683	0.00261373	0.00050601	1	1.07203e-05	0.00152393	0.00197134	2.45182e-05	2.91891e-05	1.60018e-05	1.1387e-05	1.12509e-05	1.0697e-05		50.1938
		0.00258224	0.00233857	0.0025689	0.00055668	1	9.80131e-06	0.00142519	0.00188192	2.37482e-05	2.87317e-05	1.0721e-05	1.44764e-05	1.00507e-05	1.12233e-05		50.1915
		0.00242207	0.00258028	0.00260814	0.000491192	1	7.57911e-06	0.00145512	0.00175205	2.68216e-05	2.84037e-05	9.91984e-06	1.36385e-05	1.17885e-05	1.01903e-05		50.1893
		0.00246577	0.00231073	0.00252951	0.000528303	1	7.12357e-06	0.00135989	0.00188719	2.68791e-05	3.01706e-05	1.06345e-05	1.2308e-05	1.20697e-05	8.85197e-06		50.187
		0.00257214	0.00246775	0.00264546	0.000532051	1	9.26197e-06	0.00130667	0.00186078	2.50592e-05	2.44594e-05	1.34544e-05	1.4149e-05	1.12923e-05	1.07805e-05		50.1848
		0.00251911	0.00262524	0.00278749	0.000539349	1	7.79612e-06	0.00131196	0.00191209	2.90824e-05	3.07753e-05	1.31125e-05	1.13786e-05	1.31571e-05	1.10854e-05		50.1825
		0.00251213	0.00243521	0.00276657	0.000625884	1	9.36322e-06	0.0018078	0.00187494	3.48521e-05	2.98233e-05	1.17547e-05	1.36045e-05	1.18322e-05	1.26205e-05		50.1803
		0.00248794	0.00258469	0.00277196	0.000566867	1	8.43803e-06	0.0013824	0.0018373	2.5726e-05	2.81886e-05	1.06194e-05	1.07578e-05	9.19816e-06	1.13895e-05		50.178
		0.00240949	0.00255209	0.0025126	0.000565678	1	7.64787e-06	0.00119255	0.00215057	4.38409e-05	2.79075e-05	7.60091e-06	1.24797e-05	1.00271e-05	9.35045e-06		50.1757
		0.00229	0.00228724	0.00247679	0.000681729	1	8.28459e-06	0.00124163	0.0017368	2.74863e-05	3.53173e-05	8.89095e-06	5.88448e-06	8.91811e-06	9.36944e-06		50.1735
		0.00234131	0.00245311	0.0024483	0.000576144	1	8.84003e-06	0.00118882	0.00171669	2.01878e-05	2.58934e-05	7.56011e-06	1.02221e-05	1.10944e-05	7.62613e-06		50.1712
		0.00240911	0.00258753	0.0024574	0.000650218	1	1.07121e-05	0.00121296	0.00180889	2.96159e-05	2.71356e-05	1.04117e-05	6.78032e-06	1.21416e-05	1.02244e-05		50.169
		0.00245755	0.00251705	0.00263715	0.000632861	1	1.02862e-05	0.00167796	0.00180804	2.93575e-05	2.62052e-05	1.76653e-05	1.1785e-05	9.7665e-06	9.18848e-06		50.1667
		0.00248299	0.00215874	0.00236138	0.000596698	1	8.19631e-06	0.00103192	0.00178308	3.17475e-05	2.2937e-05	1.24244e-05	1.00627e-05	1.00385e-05	1.09533e-05		50.1644
		0.00235616	0.00242168	0.00218331	0.00066634	1	8.3763e-06	0.000813182	0.00153361	3.21274e-05	2.82737e-05	7.70067e-06	8.92462e-06	9.01683e-06	6.68284e-06		50.1622
		0.00226454	0.00237875	0.00212262	0.000641817	1	1.00264e-05	0.000805807	0.0017221	1.97913e-05	2.58155e-05	8.96714e-06	6.67682e-06	8.31116e-06	6.66631e-06		50.1599
		0.00230732	0.0023541	0.00276337	0.000553215	1	6.89159e-06	0.000781329	0.00153135	2.33758e-05	2.67831e-05	1.32204e-05	9.17767e-06	8.568e-06	8.94466e-06		50.1577
		0.00230086	0.00235064	0.00197598	0.000664267	1	6.0282e-06	0.000663127	0.00135053	1.83427e-05	2.25339e-05	7.38848e-06	6.42202e-06	8.65129e-06	7.75047e-06		50.1554
		0.00227514	0.00214283	0.0026011	0.00065214	1	7.3308e-06	0.000700774	0.00145098	2.90287e-05	2.63598e-05	4.84711e-06	7.03644e-06	9.61139e-06	5.44291e-06		50.1531
		0.00226661	0.00231384	0.00177528	0.000626367	1	5.16992e-06	0.000619492	0.00145612	1.71342e-05	2.32601e-05	1.07743e-05	9.00572e-06	7.44168e-06	7.3799e-06		50.1509
		0.00234471	0.00221176	0.0017885	0.000682132	1	7.22888e-06	0.00070588	0.00158496	2.77257e-05	2.41213e-05	3.72838e-06	1.22943e-05	8.21264e-06	7.40261e-06		50.1486
		0.00230396	0.00239062	0.00178408	0.0006427	1	5.97658e-06	0.00061055	0.00143166	2.63787e-05	2.3516e-05	7.71051e-06	5.95723e-06	8.34241e-06	5.44982e-06		50.1463
		0.00213652	0.00203286	0.0016654	0.000692715	1	6.53567e-06	0.000593106	0.00125913	2.59918e-05	2.28694e-05	7.39456e-06	7.14148e-06	8.76805e-06	5.673e-06		50.1441
		0.00205976	0.00203383	0.00148085	0.000672364	1	4.3297e-06	0.000538318	0.00125406	1.95269e-05	2.10034e-05	1.26527e-05	5.85561e-06	6.40231e-06	5.81449e-06		50.1418
		0.00225047	0.00222189	0.00135796	0.000674076	1	5.40885e-06	0.000503165	0.00130086	2.348e-05	2.16175e-05	1.1948e-05	6.91384e-06	8.84208e-06	7.2232e-06		50.1396
		0.00204519	0.00215948	0.00127815	0.000749055	1	5.21789e-06	0.000548308	0.00125792	2.31129e-05	2.15312e-05	2.58833e-06	6.04951e-06	5.80184e-06	5.53425e-06		50.1373
		0.00218365	0.00228035	0.00127782	0.000667932	1	7.68369e-06	0.000516464	0.00134305	1.59514e-05	2.06259e-05	8.31007e-06	8.82827e-06	7.63587e-06	5.53907e-06		50.135
		0.00194092	0.00222413	0.00115469	0.000640827	1	5.07136e-06	0.000436225	0.00125931	2.49083e-05	2.14763e-05	9.26136e-06	9.96089e-06	7.40762e-06	6.0866e-06		50.1328
		0.00233426	0.00233432	0.00124715	0.000756403	1	4.90981e-06	0.00044646	0.0010902	2.24165e-05	2.11958e-05	5.58489e-06	9.72902e-06	7.34033e-06	3.90603e-06		50.1305
		0.00204857	0.00204444	0.00113437	0.000691483	1	4.26965e-06	0.000440273	0.0013211	2.09543e-05	1.7544e-05	7.84718e-06	7.57862e-06	7.32687e-06	4.12502e-06		50.1283
		0.00211506	0.00205232	0.0011354	0.000669736	1	4.38142e-06	0.00290213	0.000914861	6.80525e-06	2.08435e-05	1.02366e-05	4.44415e-06	6.2514e-06	4.18598e-06		50.126
		0.00206194	0.00210131	0.00110779	0.000663941	1	4.24594e-06	0.000514406	0.00104708	1.83672e-05	1.84934e-05	8.00347e-06	6.95656e-06	6.9982e-06	5.49579e-06		50.1237
		0.0021526	0.0019644	0.00111455	0.000675529	1	4.60826e-06	0.000384635	0.00113694	1.73426e-05	2.01472e-05	1.31539e-05	5.32654e-06	7.12312e-06	4.14183e-06		50.1215
		0.00197543	0.00192133	0.00102005	0.000678708	1	4.27616e-06	0.000345954	0.000863014	1.6877e-05	1.82923e-05	5.10117e-06	4.44307e-06	5.79523e-06	3.4134e-06		50.1192
		0.00179837	0.00191374	0.000931013	0.000771688	1	3.31312e-06	0.000328405	0.00092182	1.5077e-05	1.92428e-05	6.53994e-06	5.30989e-06	6.16935e-06	3.18047e-06		50.117
		0.0019363	0.00194637	0.00828121	0.000747738	1	3.33854e-06	0.000328035	0.00102025	1.81637e-05	1.65087e-05	7.91479e-06	7.64392e-06	7.62468e-06	4.31985e-06		50.1147
		0.00195234	0.00194065	0.000915272	0.00071814	1	3.39867e-06	0.000322716	0.0010413	1.95029e-05	1.90314e-05	1.01034e-05	9.5039e-06	5.16015e-06	4.43617e-06		50.1124
		0.00202557	0.00200268	0.000829043	0.000691079	1	3.03632e-06	0.000343349	0.0009505	2.05299e-05	2.4046e-05	3.96755e-06	4.61727e-06	7.67621e-06	4.02831e-06		50.1102
		0.00199607	0.00195958	0.00089256	0.000752816	1	4.33569e-06	0.000294086	0.00101952	1.45481e-05	2.02903e-05	-3.29268e-08	7.69582e-06	6.2589e-06	2.26451e-06		50.1079
		0.00200457	0.00188667	0.000812094	0.000724544	1	3.41442e-06	0.000303312	0.000996722	2.16152e-05	1.84441e-05	5.38526e-06	7.81765e-06	5.1581e-06	3.44061e-06		50.1057
		0.00199594	0.0020864	0.000760327	0.000753117	1	1.01474e-05	0.000334354	0.000997574	1.95036e-05	2.10139e-05	5.22654e-06	6.82848e-06	5.35541e-06	2.86491e-06		50.1034
		0.00199902	0.00194282	0.000746596	0.000747442	1	3.1763e-06	0.000301901	0.000973041	2.29678e-05	2.18128e-05	2.57208e-06	6.01153e-06	6.11143e-06	3.46377e-06		50.1011
		0.00200852	0.00192723	0.00078449	0.000750567	1	4.85667e-06	0.000286209	0.000936819	1.78624e-05	1.78829e-05	2.68267e-06	3.13497e-06	4.9307e-06	2.14292e-06		50.0989
		0.00192107	0.00200946	0.000667218	0.000689721	1	3.34602e-06	0.000263888	0.000843709	2.65029e-05	1.96418e-05	5.45303e-06	8.70767e-06	6.924e-06	2.49425e-06		50.0966
		0.00197218	0.00195682	0.000647277	0.000789178	1	2.58249e-06	0.000249323	0.000646438	1.81405e-05	1.84345e-05	9.22753e-06	8.3976e-06	5.8572e-06	3.04169e-06		50.0944
		0.00191562	0.00194268	0.000633833	0.000792128	1	2.67862e-06	0.000249279	0.000969249	1.88032e-05	1.86944e-05	5.23682e-06	0	6.53279e-06	3.34577e-06		50.0921
		0.00199106	0.00191077	0.000612573	0.000702338	1	5.07145e-06	0.00022498	0.00109081	2.67499e-05	1.90519e-05	5.06296e-06	9.55481e-06	5.075e-06	2.92839e-06		50.0898
		0.00197776	0.00195649	0.000656765	0.000758796	1	2.40372e-06	0.000235026	0.000900954	2.69837e-05	1.99585e-05	1.28159e-05	1.11213e-05	5.8021e-06	4.18992e-06		50.0876
		0.00196358	0.00186317	0.000595215	0.000804182	1	2.9479e-06	0.000232752	0.000791936	2.53827e-05	1.86196e-05	8.42976e-06	7.67159e-06	4.28045e-06	3.21469e-06		50.0853
		0.00181415	0.00173798	0.000600706	0.000612909	1	3.04903e-06	0.000220115	0.000781452	1.60709e-05	1.83565e-05	8.17477e-06	3.38149e-06	4.66995e-06	3.11745e-06		50.0831
		0.00188057	0.00191826	0.000557944	0.000744567	1	3.31979e-06	0.000301823	0.000938855	1.67825e-05	1.97416e-05	7.62473e-06	3.68178e-06	6.44095e-06	1.85995e-06		50.0808
		0.00193319	0.00197987	0.000574154	0.000792768	1	2.5603e-06	0.000222815	0.000869989	1.1172e-05	1.77251e-05	6.02411e-06	3.49359e-06	6.32625e-06	2.34724e-06		50.0785
		0.00196229	0.00183858	0.00055313	0.00081839	1	4.4572e-06	0.000249786	0.000711167	2.10653e-05	1.94867e-05	6.34541e-06	8.83216e-06	4.85619e-06	2.62578e-06		50.0763
		0.00189305	0.00193671	0.000475959	0.000693964	1	2.33439e-06	0.000193242	0.000731562	1.99079e-05	1.80253e-05	7.45531e-06	4.32003e-06	5.08219e-06	3.61894e-06		50.074
		0.00201952	0.0020102	0.000443605	0.000840124	1	3.25774e-06	0.000221177	0.000891554	1.4825e-05	1.81767e-05	6.43062e-06	5.22112e-06	7.09664e-06	3.90443e-06		50.0718
		0.001979	0.001977	0.000429676	0.000769885	1	2.20505e-06	0.000186065	0.00084569	2.49343e-05	1.93053e-05	1.25864e-06	7.44752e-06	5.14249e-06	1.8811e-06		50.0695
		0.00192013	0.00217846	0.000433	0.000889174	1	3.05287e-06	0.000181199	0.000818613	2.28353e-05	1.78752e-05	1.26264e-06	5.22969e-06	5.84682e-06	3.59948e-06		50.0672
		0.00191563	0.00191823	0.000383361	0.000752325	1	2.94715e-06	0.000168972	0.000888952	1.92781e-05	1.77643e-05	2.38652e-06	5.57783e-06	5.02842e-06	3.0686e-06		50.065
		0.00185847	0.00198348	0.000446179	0.00077418	1	2.79416e-06	0.000189658	0.000827945	2.9236e-05	1.75683e-05	6.57435e-06	2.28757e-06	6.55294e-06	2.56164e-06		50.0627
		0.00192536	0.00189133	0.000355744	0.000781054	1	3.02123e-06	0.000233826	0.000780677	1.54139e-05	2.00678e-05	3.81191e-06	2.95741e-06	5.10533e-06	2.02155e-06		50.0605
		0.00195411	0.00187601	0.00036679	0.000785414	1	2.00387e-06	0.00016333	0.000797095	2.50386e-05	2.17088e-05	7.74369e-06	7.47867e-06	5.73792e-06	2.66809e-06		50.0582
		0.0018892	0.001933	0.000339787	0.000746471	1	2.291e-06	0.000141513	0.000879818	1.26715e-05	1.80037e-05	4.86771e-06	4.94633e-06	4.66237e-06	2.07928e-06		50.0559
		0.00200309	0.00187762	0.000333735	0.000808459	1	2.31025e-06	0.000132189	0.000738186	1.55475e-05	1.58635e-05	-3.04874e-08	3.56274e-06	4.2641e-06	2.3937e-06		50.0537
		0.00180917	0.00185684	0.00033575	0.000790258	1	1.4961e-06	0.000124125	0.000774421	1.33609e-05	1.7694e-05	3.6439e-06	4.24063e-06	5.31423e-06	2.52152e-06		50.0514
		0.00196375	0.00180548	0.000300185	0.000741024	1	1.87202e-06	0.000120969	0.000727171	1.53722e-05	1.61704e-05	2.5239e-06	5.89892e-06	4.52571e-06	3.39888e-06		50.0491
		0.00178063	0.00179632	0.000289556	0.000693875	1	2.20694e-06	9.44205e-05	0.000752625	1.35294e-05	1.59843e-05	3.50945e-06	4.76483e-06	3.65557e-06	2.00299e-06		50.0469
		0.00206716	0.00183774	0.000316656	0.000688325	1	1.84459e-06	0.000104977	0.000810569	1.9383e-05	1.80281e-05	2.4869e-06	3.63272e-06	3.56736e-06	2.5921e-06		50.0446
		0.00192926	0.00177503	0.000309609	0.000803436	1	2.48519e-06	0.000105326	0.000702498	1.82145e-05	1.78297e-05	2.62369e-06	3.06604e-06	3.52831e-06	1.45698e-06		50.0424
		0.00186504	0.00200331	0.000276624	0.00076135	1	3.012e-06	0.000100815	0.000733374	1.57339e-05	2.44719e-05	5.45315e-06	1.58316e-06	6.07361e-06	3.15407e-06		50.0401
		0.00189579	0.00181951	0.000240122	0.000758723	1	1.90892e-06	9.07203e-05	0.000674125	1.85977e-05	1.70727e-05	3.87655e-06	3.75942e-06	3.92255e-06	2.83917e-06		50.0378
		0.00174036	0.00175399	0.000240392	0.00074501	1	1.56463e-06	9.67855e-05	0.000911293	1.31023e-05	1.72746e-05	5.9755e-06	5.54474e-06	3.19032e-06	2.3283e-06		50.0356
		0.00175206	0.00187175	0.000227626	0.000739842	1	1.64176e-06	0.000103588	0.000760655	1.44548e-05	1.56263e-05	1.22909e-06	4.36353e-06	3.79401e-06	1.38236e-06		50.0333
		0.00195288	0.00194526	0.00024678	0.000787808	1	1.9425e-06	9.14621e-05	0.000754548	1.74379e-05	1.87305e-05	7.92248e-06	3.82556e-06	3.16966e-06	2.88912e-06		50.0311
		0.0018607	0.00184934	0.000211704	0.000752714	1	1.38041e-06	9.08817e-05	0.000719213	2.07946e-05	1.71601e-05	2.57425e-06	6.0166e-06	3.34642e-06	3.15328e-06		50.0288
		0.00177494	0.00170551	0.000208201	0.000774979	1	1.44971e-06	9.6433e-05	0.000701555	1.5294e-05	1.74709e-05	3.78226e-06	5.13523e-06	4.61525e-06	2.61726e-06		50.0266
		0.00167185	0.001837	0.000260928	0.000792109	1	1.88167e-06	0.000115789	0.00076044	1.68919e-05	1.6829e-05	5.10565e-06	6.67053e-06	4.43528e-06	4.03419e-06		50.0243
		0.00200273	0.00205596	0.000211189	0.000674166	1	1.97979e-06	8.66744e-05	0.000846384	1.82755e-05	1.81698e-05	2.52906e-06	5.91099e-06	4.64836e-06	1.55838e-06		50.022
		0.00174682	0.00176606	0.000247002	0.000722924	1	1.42153e-06	0.00017824	0.000623459	1.42977e-05	1.69719e-05	3.70876e-06	3.5967e-06	3.75277e-06	2.56639e-06		50.0198
		0.00178584	0.0018172	0.000189693	0.000723538	1	1.63534e-06	8.21484e-05	0.000699973	1.29905e-05	1.70109e-05	1.22429e-06	5.07085e-06	4.55739e-06	3.18824e-06		50.0175
		0.00174073	0.0017517	0.000175864	0.000655127	1	9.54766e-07	7.08395e-05	0.000754689	1.49092e-05	1.96942e-05	2.56756e-06	6.75113e-06	4.71912e-06	3.30138e-06		50.0152
		0.00190208	0.00180181	0.000199168	0.000718007	1	1.7789e-06	6.66071e-05	0.000775851	1.61852e-05	1.86528e-05	6.39532e-06	5.19246e-06	4.21133e-06	3.88299e-06		50.013
		0.00174009	0.00186967	0.000187135	0.000727966	1	1.67994e-06	6.82036e-05	0.000830218	1.76834e-05	1.64022e-05	2.54719e-06	0	4.91011e-06	2.34482e-06		50.0107
		0.00178444	0.00181126	0.000196544	0.000695544	1	2.48835e-06	7.69017e-05	0.000642258	1.74919e-05	1.86182e-05	5.28701e-06	6.90748e-06	4.82841e-06	4.33743e-06		50.0085
		0.00187986	0.00181592	0.000193686	0.000720185	1	1.2718e-06	7.5609e-05	0.000807293	1.34568e-05	1.32125e-05	2.56856e-06	5.25285e-06	3.22387e-06	3.45904e-06		50.0062
		0.00173964	0.00166433	0.000264024	0.000655771	1	1.32216e-06	6.36105e-05	0.000595625	1.9217e-05	1.88324e-05	2.46561e-06	7.20309e-07	4.42119e-06	2.11963e-06		50.0039
		0.00177837	0.00173545	0.000168058	0.000724066	1	1.66743e-06	6.82447e-05	0.000735774	9.65698e-06	1.75086e-05	6.3681e-06	2.95448e-06	4.42011e-06	3.25081e-06		50.0017
		0.00183674	0.00176208	0.000163411	0.000700857	1	2.53561e-06	5.89517e-05	0.000627241	2.29099e-05	1.73518e-05	9.06002e-06	2.99815e-06	4.71551e-06	2.20559e-06		49.9994
		0.00195914	0.0017646	0.00016442	0.000701474	1	1.37698e-06	7.36359e-05	0.000724896	1.49109e-05	1.76166e-05	3.86783e-06	6.7519e-06	3.56834e-06	1.58228e-06		49.9972
		0.00173479	0.0018035	0.000158451	0.000710669	1	1.98415e-06	8.78295e-05	0.000759757	1.68767e-05	1.8374e-05	2.53463e-06	6.66454e-06	3.63582e-06	2.02467e-06		49.9949
		0.00179335	0.00179192	0.000153682	0.000667782	1	9.48646e-07	6.91391e-05	0.000720166	1.9159e-05	1.75017e-05	6.4257e-06	5.21713e-06	4.4601e-06	3.59083e-06		49.9926
		0.00176375	0.00160911	0.000126746	0.000617118	1	1.71062e-06	5.8751e-05	0.000675044	1.76434e-05	1.74622e-05	1.20553e-06	3.56651e-06	4.70652e-06	1.80172e-06		49.9904
		0.00167425	0.00163108	0.000141727	0.000710795	1	2.43754e-06	6.37638e-05	0.000703421	1.1521e-05	1.54024e-05	2.46637e-06	3.60272e-06	4.42255e-06	4.82297e-06		49.9881
		0.00166064	0.00169525	0.000143414	0.000764341	1	1.00701e-06	7.85381e-05	0.000532354	1.41603e-05	1.9021e-05	7.37695e-06	3.56214e-06	4.37272e-06	3.58091e-06		49.9859
		0.00176095	0.00173506	0.000309915	0.000664398	1	1.52761e-06	7.44561e-05	0.000496142	2.06551e-05	4.46e-05	6.22182e-06	4.32996e-06	3.65408e-06	1.97317e-06		49.9836
		0.0017369	0.00171592	0.000131646	0.000717894	1	1.62258e-06	5.39951e-05	0.000637259	1.77781e-05	1.64797e-05	1.21473e-06	2.1562e-06	3.9703e-06	2.56428e-06		49.9813
		0.00176192	0.00181269	0.000127587	0.000747278	1	2.15748e-06	5.50102e-05	0.000704089	2.65208e-05	1.9212e-05	7.54505e-06	2.91466e-06	3.80139e-06	2.14416e-06		49.9791
		0.00178106	0.00171954	0.000132947	0.000638557	1	1.15534e-06	5.66736e-05	0.000673902	1.18862e-05	1.99299e-05	6.40918e-06	5.20371e-06	6.27419e-06	3.73649e-06		49.9768
		0.00185047	0.00176296	0.000178149	0.000713207	1	1.42281e-06	6.15748e-05	0.000710047	1.15121e-05	1.71468e-05	7.45524e-06	5.03996e-06	4.52963e-06	4.36911e-06		49.9746
		0.00172972	0.00179343	0.000120791	0.000711399	1	1.47728e-06	5.34634e-05	0.000632649	1.45492e-05	1.68523e-05	1.17946e-06	4.88517e-06	4.06919e-06	3.94406e-06		49.9723
		0.00169658	0.0017456	0.000165	0.000664228	1	1.7956e-06	5.81212e-05	0.000704528	1.47447e-05	1.9432e-05	2.42086e-06	3.53625e-06	3.68969e-06	2.22853e-06		49.97
		0.00177764	0.00183189	0.000127753	0.000660012	1	1.38271e-06	5.71107e-05	0.000634301	1.79868e-05	1.62756e-05	3.60748e-06	6.99718e-06	4.40198e-06	3.66273e-06		49.9678
		0.00175014	0.00164583	0.000131783	0.000623941	1	1.83535e-06	5.32339e-05	0.000669736	1.85834e-05	1.60941e-05	6.23265e-06	1.80745e-05	4.88085e-06	2.12723e-06		49.9655
		0.00176278	0.00175942	0.000116779	0.000636759	1	1.21845e-06	5.26736e-05	0.000608781	2.26729e-05	1.9035e-05	4.95251e-06	2.8757e-06	2.75767e-06	1.9657e-06		49.9633
		0.00167734	0.00173363	0.000125468	0.000697365	1	1.64742e-06	4.83207e-05	0.000581624	2.44328e-05	1.90789e-05	6.29166e-06	5.83811e-06	5.82312e-06	2.7556e-06		49.961
		0.00164157	0.00168255	0.000103207	0.000704072	1	9.08463e-07	4.56707e-05	0.00375186	1.55733e-05	1.6048e-05	3.67982e-06	4.28243e-06	4.27117e-06	3.14127e-06		49.9587
		0.00157941	0.00161634	9.20933e-05	0.000627388	1	6.26461e-06	4.15152e-05	0.000600086	1.82616e-05	1.98702e-05	5.9016e-06	6.8453e-06	3.25591e-06	3.58323e-06		49.9565
		0.00181114	0.00176077	0.000108711	0.000754814	1	1.75295e-06	4.43579e-05	0.000781243	1.24157e-05	2.01288e-05	5.34915e-06	5.43554e-06	4.17014e-06	3.41754e-06		49.9542
		0.00160807	0.00161838	0.000139225	0.000646676	1	1.87103e-06	4.34661e-05	0.000741463	1.53641e-05	2.0657e-05	6.35382e-06	9.5809e-06	4.86263e-06	3.24352e-06		49.9519
		0.00173452	0.00167328	0.000411074	0.000689146	1	1.42532e-06	4.50843e-05	0.000536653	2.45068e-05	1.89481e-05	5.8052e-06	5.38671e-06	4.44276e-06	4.50692e-06		49.9497
		0.00171111	0.00177603	0.000105682	0.000727702	1	1.20745e-06	4.90246e-05	0.000738065	1.41604e-05	1.8231e-05	7.37699e-06	4.98706e-06	3.49806e-06	3.72939e-06		49.9474
		0.00165435	0.00167368	0.000110542	0.000685925	1	1.51291e-06	0.000177091	0.000590978	1.83726e-05	1.91611e-05	6.16193e-06	6.43249e-06	4.60608e-06	2.8477e-06		49.9452
		0.00175571	0.00164071	0.000124983	0.000631351	1	1.13685e-06	3.73232e-05	0.000755031	1.52879e-05	1.70906e-05	8.10802e-06	2.68312e-06	3.91118e-06	3.37155e-06		49.9429
		0.00168871	0.00166452	0.000119619	0.000616616	1	1.37258e-06	4.18676e-05	0.000525923	1.92049e-05	2.06246e-05	4.78474e-06	3.47284e-06	3.73013e-06	4.21485e-06		49.9406
		0.00169285	0.00181975	0.000104191	0.000743491	1	5.81834e-07	4.76899e-05	0.000572243	2.22303e-05	1.6892e-05	9.45069e-06	8.20608e-06	3.04274e-06	4.43461e-06		49.9384
		0.00153559	0.00164105	8.24856e-05	0.000664242	1	1.44955e-06	3.89911e-05	0.000511691	1.95996e-05	1.99539e-05	2.34393e-06	7.53278e-06	4.51828e-06	1.87234e-06		49.9361
		0.00158349	0.00164641	8.92502e-05	0.000688885	1	1.78685e-06	3.79569e-05	0.000624843	1.56717e-05	1.69162e-05	2.16873e-06	2.53438e-06	3.20819e-06	3.44872e-06		49.9339
		0.0018415	0.00165206	8.77413e-05	0.000666639	1	5.62109e-07	3.24714e-05	0.00069098	1.24889e-05	1.3902e-05	4.55095e-06	6.60617e-07	3.64925e-06	4.00891e-06		49.9316
		0.00151198	0.00154323	0.000130436	0.000557094	1	1.39966e-06	3.36029e-05	0.000632323	1.89249e-05	1.55269e-05	2.26325e-06	1.98357e-06	3.44947e-06	3.32344e-06		49.9293
		0.00163318	0.00155512	7.41701e-05	0.00058895	1	6.30059e-07	3.28828e-05	0.000550745	1.07778e-05	1.44288e-05	4.37745e-06	2.54179e-06	3.41261e-06	3.19396e-06		49.9271
		0.00183015	0.00159731	8.99553e-05	0.000596894	1	1.18908e-06	3.18838e-05	0.000775746	2.28083e-05	1.77202e-05	3.61726e-06	3.50797e-06	3.55252e-06	3.52646e-06		49.9248
		0.00182843	0.0016992	8.12548e-05	0.000571118	1	5.73958e-07	3.003e-05	0.000678677	1.93071e-05	1.62144e-05	3.47786e-06	4.72194e-06	3.72618e-06	2.54718e-06		49.9226
		0.00159683	0.00147866	9.33286e-05	0.000569318	1	1.02761e-06	3.26217e-05	0.00060598	1.37845e-05	1.72132e-05	3.40897e-06	4.6284e-06	3.14501e-06	4.01233e-06		49.9203
		0.00159385	0.00169463	9.07418e-05	0.000579409	1	1.35898e-06	4.32388e-05	0.00065765	1.56733e-05	1.79029e-05	4.73734e-06	1.37535e-06	4.43197e-06	3.31326e-06		49.9181
		0.00164115	0.00164622	8.88857e-05	0.000585116	1	7.69365e-07	2.84887e-05	0.000616029	1.08654e-05	1.5204e-05	1.14847e-06	3.39771e-06	3.85801e-06	2.566e-06		49.9158
		0.00157591	0.00160156	8.33002e-05	0.000620609	1	1.0188e-06	3.46254e-05	0.000545757	1.78279e-05	1.74849e-05	6.21416e-06	7.20748e-07	3.98142e-06	4.37381e-06		49.9135
		0.00162368	0.00150318	6.94809e-05	0.000507992	1	1.66523e-06	3.37438e-05	0.000636388	1.44762e-05	1.71528e-05	2.37678e-06	4.86065e-06	5.00792e-06	2.76669e-06		49.9113
		0.00161355	0.00157323	8.14895e-05	0.000611844	1	8.65211e-07	3.1395e-05	0.000751591	1.08687e-05	1.70177e-05	2.32672e-06	4.07854e-06	3.33759e-06	3.98327e-06		49.909
		0.00165116	0.00170594	0.00574277	0.000480306	1	1.08106e-06	3.58662e-05	0.000609799	1.92331e-05	2.53639e-05	7.2026e-06	5.56481e-06	4.26938e-06	3.64123e-06		49.9068
		0.00167146	0.00165739	8.61852e-05	0.000524784	1	1.42154e-06	2.94909e-05	0.000738065	1.15018e-05	1.61743e-05	3.70878e-06	5.03545e-06	3.75279e-06	5.41461e-06		49.9045
		0.00171673	0.00162292	8.632e-05	0.000588813	1	1.29154e-06	3.70324e-05	0.000797054	1.95895e-05	1.79794e-05	6.57009e-06	3.04819e-06	5.61294e-06	7.80079e-06		49.9022
		0.00166429	0.00156929	7.84325e-05	0.000563574	1	1.63355e-06	3.66401e-05	0.000670386	1.78983e-05	1.53074e-05	6.23869e-06	2.89444e-06	4.44134e-06	5.29588e-06		49.9
		0.00176384	0.00167415	8.52276e-05	0.0006526	1	1.17233e-06	4.30905e-05	0.000646261	1.86578e-05	1.58734e-05	2.58196e-06	1.5086e-06	5.44022e-06	5.2062e-06		49.8977
		0.00161006	0.00165237	8.41196e-05	0.000555727	1	1.66801e-06	3.67281e-05	0.000640387	1.68399e-05	1.71869e-05	3.80946e-06	4.43329e-06	3.85467e-06	3.40589e-06		49.8954
		0.00159383	0.00169616	9.13811e-05	0.000533802	1	1.6791e-06	3.72702e-05	0.000578951	1.32361e-05	1.70628e-05	1.18331e-06	4.20101e-06	3.2229e-06	3.95696e-06		49.8932
		0.00164684	0.00160965	7.88476e-05	0.000536756	1	1.55172e-06	3.67165e-05	0.000636806	2.03416e-05	1.7132e-05	2.35278e-06	2.74946e-06	3.69143e-06	3.31169e-06		49.8909
		0.0017964	0.00174512	9.2138e-05	0.000572397	1	1.12442e-06	3.8646e-05	0.000634253	2.49261e-05	1.60267e-05	3.73011e-06	3.61741e-06	3.21925e-06	3.1842e-06		49.8887
		0.00169231	0.00166172	8.54437e-05	0.000513508	1	6.90149e-07	4.00203e-05	0.000603272	1.18057e-05	1.9047e-05	3.58867e-06	2.78421e-06	4.80634e-06	4.22384e-06		49.8864
		0.00164711	0.00167517	9.69919e-05	0.000536454	1	1.25107e-06	3.53973e-05	0.000590743	1.95085e-05	1.72151e-05	5.87646e-06	3.40797e-06	3.13744e-06	3.85204e-06		49.8841
		0.00165426	0.00172186	0.000104597	0.000542184	1	1.30181e-06	3.69647e-05	0.000565277	2.16783e-05	1.87e-05	4.88582e-06	4.96473e-06	3.4824e-06	6.22546e-06		49.8819
		0.00178455	0.00173069	9.22231e-05	0.000536769	1	1.35051e-06	3.65741e-05	0.000740268	2.67797e-05	1.94811e-05	5.0686e-06	2.94311e-06	4.4031e-06	4.00491e-06		49.8796
		0.00162237	0.00180639	9.54641e-05	0.000594692	1	1.83679e-06	3.90481e-05	0.000677467	2.00042e-05	1.65881e-05	1.22272e-06	5.78791e-06	4.77364e-06	3.63644e-06		49.8774
		0.00179344	0.0017686	8.72123e-05	0.000509129	1	1.02096e-06	4.26009e-05	0.000597252	1.50582e-05	1.55198e-05	6.22734e-06	2.16683e-06	3.21395e-06	6.03893e-06		49.8751
		0.0016746	0.00173706	9.20544e-05	0.000474942	1	1.06748e-06	3.99203e-05	0.000586873	1.64782e-05	1.9158e-05	3.89366e-06	6.797e-06	3.01272e-06	6.15671e-06		49.8728
		0.00162162	0.00168127	9.14329e-05	0.000566541	1	4.08907e-07	4.58074e-05	0.000665141	1.91536e-05	1.70982e-05	6.18989e-06	1.43586e-06	3.85569e-06	7.79833e-06		49.8706
		0.00173379	0.00183132	9.17897e-05	0.000528307	1	1.16485e-06	3.8507e-05	0.00068691	1.99954e-05	1.75172e-05	6.46192e-06	5.24654e-06	5.06039e-06	6.57883e-06		49.8683
		0.00170869	0.00194295	9.67275e-05	0.000496331	1	9.51714e-07	3.30094e-05	0.000819288	1.34085e-05	2.51895e-05	2.55935e-06	5.98177e-06	4.93354e-06	6.8748e-06		49.8661
		0.00172738	0.00178352	8.27175e-05	0.000529185	1	1.06725e-06	2.76435e-05	0.000725085	2.16567e-05	1.7344e-05	5.92049e-06	4.12025e-06	3.4771e-06	6.74323e-06		49.8638
		0.00164986	0.00185554	9.51295e-05	0.000516183	1	1.39432e-06	4.00442e-05	0.000822301	1.81377e-05	1.82119e-05	3.63775e-06	4.93902e-06	3.78921e-06	5.45797e-06		49.8615
		0.00175406	0.00185019	9.01839e-05	0.000529111	1	9.41723e-07	3.56799e-05	0.000655976	2.11762e-05	1.70458e-05	3.81455e-06	5.17906e-06	4.65465e-06	3.87297e-06		49.8593
		0.00182102	0.00177303	8.45524e-05	0.000477737	1	8.40841e-07	3.92579e-05	0.000688049	1.11532e-05	1.97462e-05	1.25517e-06	4.4561e-06	5.01431e-06	5.5902e-06		49.857
		0.0017584	0.00173475	7.92981e-05	0.000511011	1	1.6131e-06	3.37971e-05	0.000647766	1.55912e-05	1.74135e-05	2.44585e-06	5.0019e-06	3.17951e-06	5.08068e-06		49.8548
		0.00175474	0.00167658	9.62143e-05	0.00043692	1	8.32799e-07	0.000378099	0.000644849	1.10465e-05	1.62945e-05	2.5178e-06	5.14903e-06	3.27303e-06	4.15709e-06		49.8525
		0.00164553	0.00169704	7.08094e-05	0.000516479	1	1.22752e-06	3.31831e-05	0.000497947	1.7211e-05	1.74096e-05	4.98939e-06	3.62138e-06	3.66737e-06	4.2442e-06		49.8502
		0.00169536	0.00160922	7.3195e-05	0.000440504	1	1.34265e-06	3.58187e-05	0.000590292	1.59608e-05	1.92055e-05	6.30665e-06	2.19443e-06	5.27561e-06	3.5243e-06		49.848
		0.00194007	0.00167737	7.28444e-05	0.00051312	1	9.29278e-07	3.41257e-05	0.000640038	2.01868e-05	1.69824e-05	1.23389e-06	2.92034e-06	3.80881e-06	2.75684e-06		49.8457
		0.00171628	0.00167707	8.18193e-05	0.000468506	1	1.24632e-06	3.54632e-05	0.000622705	1.74745e-05	1.70238e-05	6.34007e-06	2.20605e-06	3.27213e-06	1.85745e-06		49.8435
		0.00166143	0.00163226	7.53254e-05	0.000418975	1	9.13598e-07	3.08892e-05	0.000643532	1.42664e-05	1.60592e-05	1.21307e-06	7.17785e-06	4.51563e-06	1.96254e-06		49.8412
		0.0017227	0.00162608	6.82039e-05	0.000435135	1	1.64242e-06	2.87482e-05	0.000855149	1.58745e-05	1.9021e-05	6.27257e-06	4.36528e-06	4.01884e-06	1.68609e-06		49.8389
		0.00161923	0.00171615	7.01766e-05	0.000384232	1	1.19549e-06	6.4387e-05	0.000597309	1.67618e-05	1.57038e-05	2.41444e-06	4.93766e-06	7.68592e-06	3.39848e-06		49.8367
		0.00179247	0.0017682	0.000197035	0.000443496	1	1.7542e-06	3.06658e-05	0.000648539	2.30687e-05	1.70958e-05	5.03896e-06	4.38889e-06	4.26509e-06	1.39039e-06		49.8344
		0.0017358	0.00178798	7.45802e-05	0.00044039	1	1.16844e-06	3.96013e-05	0.000569264	1.85958e-05	1.89884e-05	1.2706e-06	3.00724e-06	4.03753e-06	2.68222e-06		49.8321
		0.00177935	0.00174157	6.90703e-05	0.000454519	1	1.13811e-06	4.63152e-05	0.000598231	1.88247e-05	2.03637e-05	5.04462e-06	5.1261e-06	3.14608e-06	1.23938e-06		49.8299
		0.00171034	0.00177339	0.000106319	0.000377056	1	8.54529e-07	3.84976e-05	0.00065416	1.50018e-05	1.77239e-05	5.19941e-06	3.01907e-06	3.35844e-06	1.12015e-06		49.8276
		0.00179525	0.00179442	9.73587e-05	0.000387671	1	9.7969e-07	2.74191e-05	0.000598128	1.82901e-05	2.07206e-05	3.96833e-06	3.07877e-06	2.95239e-06	1.94414e-06		49.8254
		0.0016959	0.00170277	5.68077e-05	0.000380753	1	7.14603e-07	2.95469e-05	0.000753821	1.92274e-05	1.64448e-05	3.71582e-06	2.88286e-06	3.20692e-06	1.9706e-06		49.8231
		0.00162607	0.00164873	6.61508e-05	0.000390999	1	1.04209e-06	2.35319e-05	0.000660996	2.25342e-05	1.91929e-05	3.80105e-06	7.37227e-07	2.94106e-06	1.55496e-06		49.8209
		0.00173262	0.00175025	6.08543e-05	0.000415776	1	9.09822e-07	2.21535e-05	0.000640872	1.14291e-05	2.13045e-05	1.20805e-06	3.57398e-06	4.05817e-06	2.99703e-06		49.8186
		0.0017388	0.001722	6.265e-05	0.000426962	1	1.22248e-06	2.19542e-05	0.000653883	2.13459e-05	1.77379e-05	1.21904e-06	3.60649e-06	3.54161e-06	1.9722e-06		49.8163
		0.0017152	0.00168313	5.98458e-05	0.000378004	1	8.25123e-06	3.99473e-05	0.000613057	1.31373e-05	2.02906e-05	3.77704e-06	2.93036e-06	3.03491e-06	1.85043e-06		49.8141
		0.00175868	0.00160152	6.65429e-05	0.00036332	1	3.21154e-07	2.07111e-05	0.000693724	9.7901e-06	1.97429e-05	3.86063e-06	7.48783e-07	4.13628e-06	1.57934e-06		49.8118
		0.00176167	0.00180314	5.89484e-05	0.000395982	1	1.30065e-06	2.87603e-05	0.000688058	1.59992e-05	1.80213e-05	2.62684e-06	3.06972e-06	3.65031e-06	2.57805e-06		49.8096
		0.00159539	0.00164542	6.37693e-05	0.000387646	1	1.45568e-06	1.92831e-05	0.0006091	2.03676e-05	1.885e-05	8.90392e-06	1.47321e-06	3.50378e-06	1.09323e-06		49.8073
		0.00181285	0.00169327	0.000134921	0.000361773	1	1.3628e-06	2.36987e-05	0.000569585	2.34155e-05	1.65296e-05	1.02613e-05	2.96989e-06	3.75949e-06	2.49422e-06		49.805
		0.00157415	0.00177474	5.91772e-05	0.000424355	1	1.45712e-06	1.93022e-05	0.000499596	1.96713e-05	1.42086e-05	1.24617e-06	2.21201e-06	3.05466e-06	1.40157e-06		49.8028
		0.00175834	0.00177253	6.5778e-05	0.0004685	1	1.59782e-06	2.633e-05	0.000759429	1.57364e-05	1.69719e-05	1.27569e-06	5.28377e-06	4.0537e-06	9.62967e-07		49.8005
		0.0016902	0.0017362	6.39633e-05	0.000369008	1	1.31266e-06	2.78612e-05	0.000648309	2.0469e-05	1.99663e-05	-3.05987e-08	2.86061e-06	2.63345e-06	1.65738e-06		49.7983
		0.00169546	0.00176846	6.4323e-05	0.000354848	1	1.11772e-06	1.94921e-05	0.000651955	1.91863e-05	1.67286e-05	3.70788e-06	4.31508e-06	2.86897e-06	1.21717e-06		49.796
		0.00182031	0.00162653	6.46249e-05	0.000392771	1	8.10254e-07	2.29755e-05	0.00059889	2.11789e-05	1.87104e-05	3.68976e-06	0	3.40407e-06	1.21122e-06		49.7937
		0.00172031	0.00173108	5.46885e-05	0.000375729	1	5.19222e-07	2.61793e-05	0.000648195	2.23459e-05	1.733e-05	5.03629e-06	2.92435e-06	2.80431e-06	9.32687e-07		49.7915
		0.00167779	0.00171494	6.12398e-05	0.000371831	1	9.06419e-07	2.4313e-05	0.000716473	1.27703e-05	1.55382e-05	3.67154e-06	3.56061e-06	2.51303e-06	1.79874e-06		49.7892
		0.00176571	0.0017005	6.4653e-05	0.000447229	1	1.22121e-06	2.29991e-05	0.000646029	2.34245e-05	1.72401e-05	2.46638e-06	4.32335e-06	3.42733e-06	2.12029e-06		49.7869
		0.00170734	0.00155807	5.60496e-05	0.000343363	1	8.85761e-07	2.13098e-05	0.000811025	1.92415e-05	1.94287e-05	2.38199e-06	4.17541e-06	3.52365e-06	1.17777e-06		49.7847
		0.00174796	0.00167699	6.09688e-05	0.000358025	1	5.06901e-07	2.62192e-05	0.000668347	1.69605e-05	1.92143e-05	2.44306e-06	1.42744e-06	3.9426e-06	1.50539e-06		49.7824
		0.00162719	0.00168197	5.22701e-05	0.000351372	1	2.56052e-06	2.03578e-05	0.000516248	1.14138e-05	2.63312e-05	1.13732e-06	2.01879e-06	2.78782e-06	2.12043e-06		49.7802
		0.00172969	0.00168788	6.02952e-05	0.000412021	1	1.04177e-07	2.00461e-05	0.000597711	1.47155e-05	1.63405e-05	3.6392e-06	2.82341e-06	2.70752e-06	1.92996e-06		49.7779
		0.00182378	0.00173943	5.47693e-05	0.000349672	1	1.48167e-06	2.19525e-05	0.000564838	2.47954e-05	1.86878e-05	1.18296e-06	2.7998e-06	4.1887e-06	1.76799e-06		49.7756
		0.00184818	0.00170427	7.16664e-05	0.000382787	1	1.31461e-06	2.19321e-05	0.000699194	1.42356e-05	1.68981e-05	2.45154e-06	2.86487e-06	3.18691e-06	9.13717e-07		49.7734
		0.00161757	0.00180165	5.69571e-05	0.000393962	1	1.29339e-06	1.81852e-05	0.000554602	1.3321e-05	1.68597e-05	1.1909e-06	7.04635e-07	4.43313e-06	1.77986e-06		49.7711
		0.00172439	0.00167936	5.38686e-05	0.000403809	1	1.00251e-06	1.44957e-05	0.000635891	2.23676e-05	1.61831e-05	6.11483e-06	4.2555e-06	2.82936e-06	9.04821e-07		49.7689
		0.00176284	0.00172653	5.27013e-05	0.000412419	1	1.08661e-06	1.90791e-05	0.000633809	9.82032e-06	1.75035e-05	3.60468e-06	4.19498e-06	3.21828e-06	1.91165e-06		49.7666
		0.00156597	0.00165164	5.71105e-05	0.000343162	1	1.0461e-06	1.98636e-05	0.000630286	1.33784e-05	1.59553e-05	1.13757e-06	4.71167e-06	3.51149e-06	1.84039e-06		49.7643
		0.00190209	0.00175546	6.08274e-05	0.000372215	1	1.32936e-06	2.71421e-05	0.000692612	1.5099e-05	1.66058e-05	2.47904e-06	5.06977e-06	3.88952e-06	2.28209e-06		49.7621
		0.00173237	0.00175913	6.6891e-05	0.000358298	1	1.56759e-06	1.79205e-05	0.000574183	1.92e-05	1.59213e-05	3.58013e-06	2.77759e-06	3.30293e-06	8.85879e-07		49.7598
		0.00155434	0.00156763	6.05979e-05	0.000385133	1	1.59916e-06	2.05431e-05	0.000657616	1.90858e-05	1.45498e-05	2.28248e-06	2.6673e-06	3.06945e-06	2.10114e-06		49.7576
		0.00169919	0.00150898	5.79848e-05	0.000393374	1	8.66921e-07	1.83339e-05	0.000773424	1.28757e-05	1.70513e-05	5.87213e-06	3.40546e-06	2.29901e-06	1.57845e-06		49.7553
		0.00155802	0.00158285	6.57761e-05	0.000384692	1	5.52968e-07	2.89318e-05	0.000608559	1.16543e-05	1.59098e-05	7.85554e-06	1.94963e-06	2.69232e-06	1.50614e-06		49.753
		0.00164795	0.00170837	7.11715e-05	0.000355189	1	7.98412e-07	0.0016657	0.000555033	1.94988e-05	1.47616e-05	1.19183e-06	4.93642e-06	4.32835e-06	2.36901e-06		49.7508
		0.00154198	0.00153906	6.82912e-05	0.000370872	1	9.27428e-07	0.000193739	0.000555602	1.0491e-05	1.6499e-05	1.10889e-06	4.5929e-06	3.82574e-06	8.37055e-07		49.7485
		0.00166671	0.0016378	7.0883e-05	0.00036907	1	6.84697e-07	0.000182621	0.000516006	1.77517e-05	1.65989e-05	3.56032e-06	5.5245e-06	4.13246e-06	2.03202e-06		49.7463
		0.00155878	0.00158504	6.93673e-05	0.000322893	1	8.50646e-07	2.20743e-05	0.000785528	1.32833e-05	1.51008e-05	2.28756e-06	4.00988e-06	2.87117e-06	1.68806e-06		49.744
		0.00161111	0.00169782	8.862e-05	0.000414809	1	1.46311e-06	0.000121775	0.000612815	1.84395e-05	1.65374e-05	2.36585e-06	4.8383e-06	3.71193e-06	1.74584e-06		49.7417
		0.0014985	0.00152128	5.9023e-05	0.000339943	1	1.5675e-06	2.86134e-05	0.000618564	1.23564e-05	1.50589e-05	3.36992e-06	3.26811e-06	2.30658e-06	9.70047e-07		49.7395
		0.00168805	0.00161278	9.92366e-05	0.000398125	1	6.85913e-07	2.37465e-05	0.000551357	1.64387e-05	1.67051e-05	4.76551e-06	2.76712e-06	2.54738e-06	2.6122e-06		49.7372
		0.00153139	0.00160468	7.22541e-05	0.000354453	1	7.90318e-07	2.46084e-05	0.000611955	1.52311e-05	1.50763e-05	-2.9867e-08	2.0941e-06	2.57047e-06	1.61775e-06		49.735
		0.00172744	0.00174476	7.11179e-05	0.000414331	1	1.41263e-06	2.77165e-05	0.000583969	1.8376e-05	1.639e-05	2.44683e-06	1.42964e-06	2.74199e-06	1.20983e-06		49.7327
		0.00158181	0.00173851	7.04612e-05	0.000352216	1	6.96203e-07	3.37314e-05	0.000699452	1.94146e-05	1.62549e-05	1.18669e-06	4.91512e-06	3.33984e-06	7.49501e-07		49.7304
		0.00174556	0.00166749	7.22695e-05	0.000346458	1	9.08866e-07	1.82954e-05	0.000711297	1.6274e-05	1.66886e-05	4.91891e-06	2.14209e-06	1.86241e-06	1.65483e-06		49.7282
		0.00149694	0.00156276	6.50113e-05	0.000603143	1	9.62548e-07	0.000237778	0.000651224	1.75053e-05	2.06741e-05	7.05121e-06	1.36191e-06	2.92558e-06	4.43125e-07		49.7259
		0.0017703	0.00167047	7.25167e-05	0.000338311	1	9.14569e-07	2.98568e-05	0.000565524	1.84708e-05	1.62356e-05	3.70456e-06	3.59263e-06	2.75615e-06	6.17271e-07		49.7237
		0.00162604	0.00150904	6.76651e-05	0.00036799	1	9.18723e-07	2.67825e-05	0.00053935	1.85547e-05	1.71897e-05	2.47063e-06	1.44355e-06	3.87632e-06	1.52237e-06		49.7214
		0.0016646	0.00158452	6.86744e-05	0.000362825	1	6.94445e-07	2.67668e-05	0.000607026	9.15707e-06	1.56703e-05	2.39735e-06	3.5019e-06	2.79401e-06	1.03944e-06		49.7191
		0.00160774	0.00158246	7.36294e-05	0.000422525	1	1.10554e-06	2.36273e-05	0.00061652	1.34474e-05	1.78085e-05	2.43484e-06	3.55667e-06	2.29195e-06	1.20391e-06		49.7169
		0.00165324	0.00166189	7.70564e-05	0.000355732	1	8.33595e-07	3.29139e-05	0.000601482	1.46342e-05	1.77796e-05	6.34789e-06	3.68136e-06	4.51908e-06	1.39952e-06		49.7146
		0.00171474	0.00164682	7.79818e-05	0.000408544	1	1.16974e-06	2.82954e-05	0.000687528	1.43889e-05	1.75086e-05	2.36245e-06	4.14116e-06	3.17699e-06	1.88713e-06		49.7124
		0.00157881	0.00166071	8.0495e-05	0.000394552	1	9.18482e-07	3.10543e-05	0.000646972	1.43426e-05	1.72652e-05	4.97096e-06	5.7729e-06	2.87866e-06	1.52197e-06		49.7101
		0.0016667	0.00155598	7.98077e-05	0.000410175	1	1.17035e-06	3.67584e-05	0.000571	1.23834e-05	1.64456e-05	2.36367e-06	5.52444e-06	2.86074e-06	1.45647e-06		49.7078
		0.00172157	0.00176962	8.01322e-05	0.000435128	1	7.068e-07	3.27913e-05	0.000695901	1.55539e-05	2.05345e-05	3.67525e-06	4.27711e-06	2.73434e-06	2.39469e-06		49.7056
		0.00172246	0.00166385	8.02776e-05	0.000374738	1	6.15497e-07	2.38933e-05	0.000641362	1.57838e-05	1.64254e-05	6.23671e-06	5.06368e-06	2.21975e-06	1.22429e-06		49.7033
		0.00160529	0.00182174	6.66625e-05	0.000400654	1	1.27782e-06	2.66058e-05	0.000457834	2.2632e-05	1.57304e-05	2.38293e-06	6.96191e-06	3.84557e-06	1.6134e-06		49.7011
		0.00148889	0.00158634	7.02906e-05	0.000307107	1	1.44106e-06	3.62288e-05	0.000661311	1.02067e-05	1.48484e-05	-2.73124e-08	4.46843e-06	3.52613e-06	1.47938e-06		49.6988
		0.00152051	0.00153822	6.87993e-05	0.000290017	1	2.86663e-07	1.82393e-05	0.000639186	1.84808e-05	1.56213e-05	2.28781e-06	3.3419e-06	3.79464e-06	1.27047e-06		49.6965
		0.00156872	0.0015188	7.08791e-05	0.00036452	1	7.60508e-07	3.76248e-05	0.000695888	1.46566e-05	1.72636e-05	2.29924e-06	6.71705e-07	3.29816e-06	2.67643e-06		49.6943
		0.00161679	0.00170338	7.35175e-05	0.00032499	1	1.12567e-06	2.64909e-05	0.00061533	#VALUE!	1.76592e-05	2.27344e-06	6.64168e-07	2.85345e-06	2.09282e-06		49.692
		0.00153111	0.00155862	7.54346e-05	0.000414811	1	9.2031e-07	2.89851e-05	0.000518927	1.80026e-05	1.9189e-05	3.35685e-06	9.76682e-06	3.29678e-06	1.50892e-06		49.6898
		0.00165291	0.00154717	7.46405e-05	0.000365213	1	1.94205e-06	3.76777e-05	0.000836843	1.70329e-05	1.56362e-05	4.74378e-06	4.13179e-06	4.12093e-06	2.31333e-06		49.6875
		0.00161359	0.001671	0.000102046	0.000344851	1	1.04285e-06	3.6838e-05	0.000701828	1.5293e-05	1.76173e-05	3.45953e-06	2.68402e-06	4.73637e-06	1.13564e-06		49.6852
		0.0017419	0.00186091	8.68861e-05	0.000373074	1	1.12371e-06	4.17058e-05	0.000641055	1.99919e-05	1.77003e-05	4.98081e-06	7.23016e-07	3.55011e-06	1.67565e-06		49.683
		0.00163356	0.00162859	8.23022e-05	0.000376277	1	1.84398e-06	3.34427e-05	0.000486829	1.70219e-05	1.84499e-05	3.54808e-06	1.10115e-05	3.59019e-06	1.73826e-06		49.6807
		0.00164236	0.00160914	0.000103652	0.000385371	1	2.13003e-06	3.36285e-05	0.000581548	2.03238e-05	1.90214e-05	2.35073e-06	2.74706e-06	3.26663e-06	2.59327e-06		49.6784
		0.00168528	0.00177672	7.76621e-05	0.000282197	1	6.04837e-07	3.70484e-05	0.000658565	2.24183e-05	1.79539e-05	2.43318e-06	3.55424e-06	2.50853e-06	2.09175e-06		49.6762
		0.00168789	0.00175812	7.30972e-05	0.000337218	1	6.77647e-07	7.7249e-05	0.000565125	1.69047e-05	1.62006e-05	2.33936e-06	1.36685e-06	4.29969e-06	1.44148e-06		49.6739
		0.00157309	0.00162319	7.66813e-05	0.000328997	1	1.72218e-06	2.93274e-05	0.000659447	2.08943e-05	1.46652e-05	3.31372e-06	6.42708e-07	2.85989e-06	1.48953e-06		49.6717
		0.00164691	0.00160613	7.75843e-05	0.000297889	1	1.0539e-06	3.73679e-05	0.000743292	1.90067e-05	1.79819e-05	-2.66061e-08	3.10917e-06	2.00357e-06	1.70024e-06		49.6694
		0.00179453	0.0015571	8.4388e-05	0.000351084	1	9.43009e-07	7.52833e-05	0.000471951	1.715e-05	2.29197e-05	4.59583e-06	5.33725e-06	3.27571e-06	1.40712e-06		49.6671
		0.00172196	0.0017515	7.36099e-05	0.00030493	1	8.46459e-07	4.13199e-05	0.000655834	1.12793e-05	2.01898e-05	3.42867e-06	1.33001e-06	3.16319e-06	2.23402e-06		49.6649
		0.00164069	0.00170709	8.01599e-05	0.000248519	1	6.3439e-06	3.57289e-05	0.000676502	1.42483e-05	2.01874e-05	2.23518e-06	0	3.30649e-06	2.60186e-06		49.6626
		0.00166722	0.00168627	8.03706e-05	0.000275387	1	1.3827e-06	3.73139e-05	0.000650678	2.12348e-05	1.60631e-05	4.49971e-06	2.61278e-06	2.90648e-06	1.5138e-06		49.6604
		0.00162937	0.00154651	7.55073e-05	0.000254784	1	1.37276e-06	4.33014e-05	0.000704122	1.66706e-05	1.85371e-05	6.71498e-06	2.594e-06	2.48753e-06	1.90827e-06		49.6581
		0.00161955	0.00169621	9.0281e-05	0.000194315	1	1.36097e-06	4.35577e-05	0.000665472	2.10503e-05	1.89222e-05	1.16394e-06	2.7548e-06	3.90998e-06	3.31812e-06		49.6559
		0.00149408	0.00146337	7.88167e-05	0.000233274	1	1.44607e-06	3.99194e-05	0.00067637	1.27319e-05	1.93763e-05	-2.74075e-08	0	2.55539e-06	2.15188e-06		49.6536
		0.00184439	0.00163171	0.000101132	0.000240351	1	2.15631e-06	4.03603e-05	0.000616411	1.51697e-05	2.09529e-05	3.58447e-06	3.47617e-06	3.30693e-06	2.19067e-06		49.6513
		0.00160347	0.0016024	9.80287e-05	0.000221389	1	1.56358e-06	4.01475e-05	0.000662462	1.23254e-05	1.76966e-05	3.36149e-06	2.60796e-06	3.90169e-06	1.37515e-06		49.6491
		0.00176203	0.00173497	7.84339e-05	0.000226002	1	2.59517e-06	3.94683e-05	0.000618301	2.74757e-05	1.94205e-05	2.33459e-06	4.09234e-06	3.13953e-06	1.15434e-06		49.6468
		0.00168193	0.00177767	7.96861e-05	0.000224267	1	1.63322e-06	3.09491e-05	0.000597033	1.6845e-05	1.78805e-05	2.3311e-06	4.08621e-06	2.92583e-06	1.4364e-06		49.6445
		0.00172573	0.0016386	8.0914e-05	0.000204274	1	1.14392e-06	3.41762e-05	0.000618585	1.86624e-05	1.65232e-05	3.47988e-06	2.0248e-06	3.31402e-06	1.28295e-06		49.6423
		0.0018372	0.00179957	8.51518e-05	0.000208918	1	1.54785e-06	2.76011e-05	0.000621562	1.6293e-05	1.71653e-05	1.15879e-06	3.42823e-06	3.47177e-06	1.44614e-06		49.64
		0.00168454	0.00168971	8.19648e-05	0.000207955	1	2.34177e-06	3.38985e-05	0.000635568	1.32096e-05	1.71543e-05	-2.84358e-08	1.99375e-06	2.34531e-06	1.26327e-06		49.6378
		0.00176751	0.0017792	8.38659e-05	0.000209219	1	2.43581e-06	4.23109e-05	0.000640441	2.65041e-05	1.77665e-05	2.36622e-06	1.38254e-06	3.71251e-06	1.89014e-06		49.6355
		0.00170443	0.00183854	8.93022e-05	0.000189804	1	2.06689e-06	3.54762e-05	0.000570269	1.86232e-05	1.77085e-05	2.38942e-06	4.18845e-06	2.46342e-06	7.45136e-07		49.6332
		0.00175418	0.00185504	8.37018e-05	0.000193371	1	2.3803e-06	4.13467e-05	0.000713294	1.40834e-05	1.93099e-05	1.1417e-06	6.75519e-07	3.52423e-06	1.14331e-06		49.631
		0.00177943	0.0018018	8.4527e-05	0.000176383	1	2.52543e-06	4.01312e-05	0.000562036	1.51271e-05	1.87513e-05	4.57223e-06	2.65489e-06	2.85147e-06	1.67648e-06		49.6287
		0.00167491	0.00172543	7.76377e-05	0.000173188	1	2.71812e-06	3.3222e-05	0.000727399	1.16843e-05	2.02267e-05	3.55176e-06	3.44445e-06	3.27675e-06	2.45776e-06		49.6265
		0.00180646	0.00178003	7.94125e-05	0.000210414	1	2.23895e-06	4.4316e-05	0.000687899	1.84229e-05	1.7901e-05	1.16709e-06	3.45278e-06	3.28468e-06	1.16874e-06		49.6242
		0.00174529	0.00167289	7.90824e-05	0.000145863	1	1.01792e-06	4.34899e-05	0.000606787	2.06557e-05	1.86492e-05	2.24187e-06	3.2748e-06	2.2108e-06	9.72032e-07		49.6219
		0.00189858	0.0018544	0.000153578	0.000145025	1	1.94143e-06	3.52099e-05	0.000678467	1.86255e-05	1.95856e-05	3.73558e-06	7.24529e-07	3.22397e-06	9.24343e-07		49.6197
		0.0018109	0.00189429	8.20175e-05	0.000145713	1	1.23504e-06	3.29479e-05	0.000676973	1.92587e-05	1.88604e-05	4.63522e-06	3.36431e-06	2.58099e-06	1.83977e-06		49.6174
		0.00174262	0.00173969	9.71367e-05	0.000113881	1	1.62778e-06	3.67448e-05	0.000587608	1.27435e-05	2.02477e-05	1.08358e-06	1.92341e-06	2.55772e-06	9.51535e-07		49.6152
		0.00189373	0.00181296	0.000102777	0.000133767	1	2.30804e-06	4.12525e-05	0.000652464	1.95277e-05	1.76104e-05	2.33534e-06	2.72907e-06	2.61705e-06	2.29197e-06		49.6129
		0.00185593	0.00177811	9.20218e-05	0.000100897	1	1.83485e-06	4.77893e-05	0.000499116	1.73572e-05	1.91028e-05	3.3544e-06	5.85564e-06	1.69696e-06	1.64337e-06		49.6106
		0.00190841	0.00172097	9.22678e-05	9.27364e-05	1	8.51098e-07	3.79495e-05	0.00069272	2.17376e-05	1.83717e-05	2.28877e-06	2.67466e-06	2.77009e-06	7.13748e-07		49.6084
		0.00190602	0.00177851	9.84722e-05	0.000127175	1	1.8139e-06	4.94727e-05	0.000681084	1.67442e-05	1.67224e-05	-2.89643e-08	4.06175e-06	2.18116e-06	2.27411e-06		49.6061
		0.00183759	0.00185903	9.75851e-05	0.000104583	1	1.22169e-06	7.32507e-05	0.00070942	1.71099e-05	1.85088e-05	2.27825e-06	2.66236e-06	2.34881e-06	1.81987e-06		49.6039
		0.00184273	0.00190992	0.000102135	9.57137e-05	1	1.79615e-06	4.46345e-05	0.000627696	1.20208e-05	1.77482e-05	2.29447e-06	0	2.26267e-06	9.94835e-07		49.6016
		0.00174932	0.00204348	0.000133373	0.000102488	1	9.72695e-07	4.56935e-05	0.000651237	1.83586e-05	1.82201e-05	1.16301e-06	1.37627e-06	2.32283e-06	1.88156e-06		49.5993
		0.00178724	0.00202442	0.000132253	8.83042e-05	1	1.74541e-06	5.38157e-05	0.000527401	1.70047e-05	2.07955e-05	8.30994e-06	3.4374e-06	2.74255e-06	1.16353e-06		49.5971
		0.00197566	0.00190436	0.000123436	8.45694e-05	1	1.2085e-06	5.08062e-05	0.00062309	2.14042e-05	1.81629e-05	4.53561e-06	2.63363e-06	3.0307e-06	1.93742e-06		49.5948
		0.00198931	0.00191116	0.000133232	8.72238e-05	1	1.30047e-06	8.13611e-05	0.000629333	1.49985e-05	2.05633e-05	2.25255e-06	3.29039e-06	2.62525e-06	7.02451e-07		49.5926
		0.00201456	0.0018881	0.000145705	9.08389e-05	1	2.06191e-06	6.84669e-05	0.000649001	1.19217e-05	1.65697e-05	3.42756e-06	3.324e-06	2.34603e-06	1.81772e-06		49.5903
		0.00196657	0.00200862	0.000226974	7.44108e-05	1	1.81244e-06	6.04861e-05	0.000660331	1.67308e-05	1.98601e-05	1.14317e-06	2.70564e-06	3.42498e-06	1.56759e-06		49.588
		0.00186292	0.00194314	0.00013718	7.1838e-05	1	2.4393e-06	5.8161e-05	0.00059393	1.27422e-05	1.98899e-05	1.08347e-06	4.48761e-06	3.3445e-06	1.48573e-06		49.5858
		0.00200033	0.00190671	0.000160788	8.2754e-05	1	1.52753e-06	5.89992e-05	0.000653828	1.54217e-05	2.06179e-05	2.3161e-06	2.0299e-06	4.04925e-06	1.9911e-06		49.5835
		0.00215535	0.00208569	0.000157043	7.44212e-05	1	1.58628e-06	6.98855e-05	0.000748946	2.4209e-05	2.06313e-05	1.18756e-06	5.62146e-06	3.12664e-06	1.92127e-06		49.5812
		0.00217014	0.00226774	0.000167187	7.04626e-05	1	1.32354e-06	7.27884e-05	0.000682402	1.85364e-05	2.25319e-05	1.21867e-06	2.16319e-06	2.21269e-06	1.9716e-06		49.579
		0.00226077	0.00218732	0.000160791	9.14067e-05	1	2.07399e-06	8.07368e-05	0.000607098	2.00486e-05	2.04111e-05	3.61143e-06	1.4009e-06	2.90183e-06	8.93623e-07		49.5767
		0.0021174	0.00234874	0.000178158	6.9601e-05	1	1.25998e-06	7.94672e-05	0.000807194	1.69437e-05	2.07558e-05	5.12132e-06	2.97373e-06	2.28128e-06	1.56801e-06		49.5745
		0.00192769	0.00205842	0.000164571	6.8675e-05	1	1.31758e-06	9.27569e-05	0.000765105	2.19409e-05	1.98023e-05	1.21318e-06	3.58916e-06	2.20273e-06	1.6636e-06		49.5722
		0.00197588	0.00197377	0.000168473	6.30073e-05	1	2.09054e-06	7.39593e-05	0.000667985	1.72018e-05	1.59278e-05	1.08973e-06	1.28954e-06	2.37434e-06	9.56932e-07		49.5699
		0.00199928	0.00211768	0.000188885	9.0178e-05	1	3.01576e-06	8.62154e-05	0.000668077	2.18069e-05	1.89692e-05	2.44208e-06	5.70769e-06	2.40823e-06	2.24806e-06		49.5677
		0.00218807	0.00213474	0.000178444	8.76431e-05	1	2.05544e-06	8.482e-05	0.000638941	1.51946e-05	1.81657e-05	-3.11841e-08	3.64416e-06	3.35488e-06	1.53722e-06		49.5654
		0.00219883	0.0022595	0.000197808	6.64356e-05	1	2.6308e-06	8.77559e-05	0.000674018	2.60373e-05	2.05043e-05	1.31432e-06	2.33298e-06	2.74436e-06	1.31618e-06		49.5632
		0.00198686	0.00225895	0.000237015	9.84469e-05	1	2.0537e-06	8.52057e-05	0.000778759	3.23654e-05	2.10584e-05	7.93629e-06	6.13167e-06	3.52803e-06	2.41505e-06		49.5609
		0.00214798	0.00207675	0.000240061	7.87984e-05	1	3.2906e-06	7.00145e-05	0.000698001	1.87627e-05	1.81109e-05	3.7631e-06	2.91954e-06	3.69575e-06	1.69153e-06		49.5587
		0.00193934	0.00217281	0.000140496	5.99376e-05	1	2.22153e-06	6.3817e-05	0.000709837	1.82795e-05	1.99658e-05	7.09485e-06	2.74075e-06	2.73339e-06	1.87345e-06		49.5564
		0.00216154	0.00201782	0.000151847	9.37451e-05	1	2.38172e-06	6.37091e-05	0.000680063	1.73759e-05	2.09712e-05	1.14237e-06	3.37967e-06	2.69649e-06	1.42566e-06		49.5541
		0.00230921	0.00222747	0.000146076	9.60944e-05	1	2.84661e-06	7.85789e-05	0.000708003	2.21399e-05	2.14681e-05	2.56079e-06	2.24434e-06	2.75489e-06	1.73382e-06		49.5519
		0.00209194	0.00200682	0.000123578	6.47356e-05	1	2.78928e-06	6.41346e-05	0.000725323	1.40509e-05	2.02857e-05	2.41975e-06	2.82772e-06	2.16927e-06	1.34373e-06		49.5496
		0.00198428	0.0020284	0.000131612	9.15326e-05	1	2.49198e-06	5.96771e-05	0.000765497	1.68215e-05	1.91379e-05	3.50631e-06	1.36012e-06	2.60865e-06	2.56801e-06		49.5474
		0.00217205	0.00210031	0.000135713	6.52861e-05	1	1.81004e-06	7.42198e-05	0.000752789	1.62488e-05	1.7137e-05	7.38224e-06	4.27768e-06	3.39113e-06	1.8008e-06		49.5451
		0.00233148	0.0021802	0.000150967	0.000100278	1	2.03911e-06	7.78255e-05	0.000813858	2.28027e-05	2.11491e-05	8.73974e-06	2.89217e-06	2.8844e-06	2.88091e-06		49.5428
		0.00207631	0.00225083	0.000130883	0.000113499	1	2.51561e-06	6.25386e-05	0.000670207	2.16511e-05	1.94717e-05	3.53955e-06	1.37302e-06	2.42269e-06	1.30495e-06		49.5406
		0.0020271	0.00210232	0.000139172	0.000108916	1	2.50782e-06	7.01244e-05	0.000602685	2.17542e-05	2.18447e-05	2.43617e-06	2.13513e-06	3.82226e-06	2.39093e-06		49.5383
		0.00218862	0.00207689	0.00015975	8.43805e-05	1	3.31881e-06	7.55103e-05	0.000782199	2.39008e-05	1.96928e-05	-3.05436e-08	1.42769e-06	3.39552e-06	1.20818e-06		49.5361
		0.00198233	0.00214008	0.000154789	0.000104703	1	2.24842e-06	7.15495e-05	0.000718432	1.44576e-05	1.91305e-05	7.18076e-06	4.8544e-06	1.91518e-06	2.96663e-05		49.5338
		0.0020641	0.00211831	0.000151305	9.37142e-05	1	2.7061e-06	9.11769e-05	0.000662715	1.09662e-05	2.06698e-05	1.15912e-06	2.74338e-06	3.157e-06	1.44655e-06		49.5315
		0.00218456	0.0020839	0.000158519	0.000111943	1	2.85139e-06	7.54897e-05	0.00065032	2.2492e-05	1.56923e-05	1.10333e-06	2.61134e-06	2.3038e-06	2.87325e-06		49.5293
		0.00220223	0.00206385	0.000172524	0.000101018	1	2.86707e-06	6.87196e-05	0.000749958	2.40276e-05	2.07427e-05	2.32167e-06	1.35652e-06	3.64261e-06	1.57192e-06		49.527
		0.00219747	0.00215278	0.000181889	0.000115874	1	3.2186e-06	8.1471e-05	0.000793056	2.18335e-05	2.19401e-05	-2.96214e-08	2.07688e-06	3.08053e-06	1.02746e-06		49.5247
		0.00220364	0.00233862	0.000204918	6.72827e-05	1	3.20913e-06	7.81288e-05	0.00071728	1.81736e-05	1.98613e-05	-3.1437e-08	1.46945e-06	3.49484e-06	2.31515e-06		49.5225
		0.00236658	0.00213315	0.000198259	9.17195e-05	1	2.17996e-06	8.41513e-05	0.000686157	3.6512e-05	1.84538e-05	3.62379e-06	2.10854e-06	2.58819e-06	2.06824e-06		49.5202
		0.00232594	0.00221547	0.000214023	9.78163e-05	1	2.70297e-06	7.88327e-05	0.000736986	3.02599e-05	1.98859e-05	2.34487e-06	1.37007e-06	2.83798e-06	1.58763e-06		49.518
		0.00210072	0.00203681	0.000225491	0.000104392	1	2.3719e-06	8.27232e-05	0.000630339	1.92668e-05	1.95404e-05	1.13766e-06	4.71207e-06	2.47878e-06	1.70029e-06		49.5157
		0.00223741	0.0022682	0.000219106	9.39114e-05	1	4.29095e-06	8.8654e-05	0.000719916	1.54599e-05	1.9703e-05	3.65303e-06	2.12556e-06	2.50036e-06	9.03918e-07		49.5134
		0.00207395	0.00215075	0.00021118	0.00011006	1	3.34363e-06	9.41387e-05	0.000766564	2.68754e-05	1.99198e-05	1.2155e-06	5.03444e-06	4.41429e-06	1.21722e-06		49.5112
		0.00238456	0.00235953	0.000231335	0.000124608	1	3.29201e-06	9.92178e-05	0.000713289	1.71782e-05	2.03742e-05	1.27383e-06	7.537e-07	3.46943e-06	1.43267e-06		49.5089
		0.00207455	0.00220072	0.000202703	0.000127897	1	4.45896e-06	0.000103555	0.000555438	1.70249e-05	1.98275e-05	8.31983e-06	1.37657e-06	5.06976e-06	7.34711e-07		49.5067
		0.00211905	0.00211035	0.000207145	0.000140304	1	3.32341e-06	8.96583e-05	0.000829377	1.85108e-05	2.13732e-05	2.375e-06	3.46926e-06	1.80974e-06	8.85189e-07		49.5044
		0.00202838	0.00200949	0.000219294	0.000143934	1	4.31074e-06	0.000113327	0.000602751	1.96814e-05	1.81359e-05	2.43644e-06	7.11822e-06	2.94881e-06	1.2047e-06		49.5021
		0.0020735	0.0021073	0.000194562	0.000130459	1	3.29029e-06	0.000123335	0.000814269	1.89939e-05	1.82643e-05	1.16097e-06	2.06077e-06	2.42415e-06	7.33257e-07		49.4999
		0.00217025	0.00219627	0.00020144	0.000120646	1	3.21631e-06	0.000119309	0.00080265	2.18297e-05	1.81516e-05	3.46206e-06	1.34296e-06	2.47268e-06	7.16771e-07		49.4976
		0.00217363	0.00197792	0.00020969	0.000135476	1	4.43005e-06	0.000127501	0.000817406	1.69145e-05	1.8637e-05	1.15573e-06	4.10307e-06	3.04284e-06	2.01226e-06		49.4954
		0.00211274	0.0020808	0.000213618	0.000152114	1	4.86713e-06	0.000136096	0.000761408	1.57948e-05	1.79674e-05	3.42694e-06	3.98813e-06	3.46761e-06	2.09439e-06		49.4931
		0.00221916	0.00220373	0.000225696	0.000148985	1	3.82792e-06	0.000136843	0.000917803	2.15497e-05	2.14489e-05	2.26898e-06	3.97733e-06	2.03411e-06	1.1219e-06		49.4908
		0.00214521	0.00211771	0.000237638	0.000139837	1	3.30903e-06	0.000117492	0.00076212	1.98614e-05	1.78442e-05	6.94941e-06	3.35568e-06	4.01629e-06	2.67411e-06		49.4886
		0.0020532	0.00205947	0.000230882	0.000152837	1	3.86647e-06	0.000115022	0.000622134	1.76418e-05	1.84751e-05	4.72761e-06	3.43138e-06	3.36964e-06	2.16244e-06		49.4863
		0.00199893	0.00213395	0.000500152	0.000134902	1	4.89584e-06	0.000101114	0.00077574	2.26045e-05	1.949e-05	1.17515e-06	2.78132e-06	3.41408e-06	1.90119e-06		49.4841
		0.00206923	0.00190245	0.00023781	0.000150938	1	7.44045e-06	0.000188813	0.000767437	1.94619e-05	1.98962e-05	4.3863e-06	2.54693e-06	3.32179e-06	3.20042e-06		49.4818
		0.00218969	0.00206676	0.000252721	0.000180284	1	5.32273e-06	0.000110273	0.000669419	2.47971e-05	2.24168e-05	1.18304e-06	2.79999e-06	4.08155e-06	2.20567e-06		49.4795
		0.00191856	0.00210914	0.000260595	0.00018871	1	4.42458e-06	0.000113125	0.000730258	1.61904e-05	2.01628e-05	2.2405e-06	1.96364e-06	3.31436e-06	2.0625e-06		49.4773
		0.00216252	0.00205817	0.000286001	0.000200983	1	4.70998e-06	0.000139122	0.000727522	2.01998e-05	1.98139e-05	2.33638e-06	2.73029e-06	3.35145e-06	1.43965e-06		49.475
		0.00214788	0.00206447	0.000301034	0.000182646	1	5.35113e-06	0.000136513	0.000777018	1.90827e-05	2.23869e-05	4.59286e-06	4.00034e-06	4.09215e-06	2.1008e-06		49.4728
		0.00199878	0.00196841	0.000305888	0.000155421	1	4.47643e-06	0.000151642	0.000757462	1.84458e-05	2.02374e-05	2.13351e-06	4.36315e-06	3.44305e-06	1.57439e-06		49.4705
		0.00208333	0.00219482	0.00036514	0.000192286	1	4.28541e-06	0.000165786	0.000888618	2.65144e-05	2.19162e-05	1.16877e-06	2.76622e-06	4.03233e-06	3.33188e-06		49.4682
		0.00209395	0.00204267	0.000348653	0.00018997	1	4.04812e-06	0.000242591	0.000832284	1.65336e-05	2.4448e-05	5.76302e-06	3.34218e-06	4.10272e-06	2.38478e-06		49.466
		0.00207141	0.00201978	0.000401684	0.000220902	1	4.87499e-06	0.000211552	0.000806912	2.65455e-05	2.67837e-05	1.17014e-06	3.46182e-06	5.31223e-06	1.60458e-06		49.4637
		0.0020578	0.00221927	0.000409623	0.000236155	1	4.87693e-06	0.000212848	0.00092669	2.1416e-05	2.28771e-05	5.85469e-06	2.03716e-06	4.48064e-06	1.85673e-06		49.4614
		0.00215529	0.00206587	0.000426487	0.000276509	1	3.02656e-06	0.000218498	0.000814484	1.84865e-05	2.33444e-05	5.97429e-06	6.92961e-06	4.89122e-06	3.04977e-06		49.4592
		0.00202965	0.00193397	0.000438246	0.000211422	1	4.19957e-06	0.000215176	0.000891086	2.34743e-05	2.34273e-05	1.11993e-06	1.98792e-06	5.49112e-06	2.77839e-06		49.4569
		0.00211494	0.00216454	0.000483364	0.000256494	1	4.18996e-06	0.000208446	0.000762017	1.752e-05	2.45699e-05	3.65192e-06	5.66663e-06	4.56491e-06	2.0843e-06		49.4547
		0.00213261	0.00212388	0.000460337	0.000232287	1	4.63996e-06	0.000247021	0.00093569	2.61958e-05	2.36942e-05	7.25878e-06	5.60821e-06	4.94822e-06	3.9618e-06		49.4524
		0.00225645	0.00210089	0.000725286	0.000251025	1	4.04292e-06	0.00023666	0.000822023	2.2631e-05	2.48918e-05	8.67395e-06	5.74086e-06	7.04794e-06	4.0555e-06		49.4502
		0.00210708	0.00187392	0.000557195	0.00028699	1	4.91298e-06	0.000262742	0.0010295	2.97178e-05	2.65621e-05	4.53484e-06	5.26643e-06	4.34355e-06	2.07426e-06		49.4479
		0.00206885	0.00206777	0.000582899	0.000298666	1	7.21077e-06	0.000248674	0.000943434	2.55351e-05	2.92438e-05	6.04878e-06	4.91111e-06	5.0599e-06	3.0878e-06		49.4456
		0.00204793	0.0021078	0.00050207	0.000293194	1	5.76302e-06	0.000259011	0.000835772	2.81428e-05	2.91915e-05	9.42771e-06	6.82172e-06	6.17625e-06	3.42873e-06		49.4434
		0.00212524	0.00204592	0.000530276	0.000334525	1	6.28327e-06	0.000234041	0.00111473	3.09934e-05	2.79309e-05	1.18681e-05	5.49248e-06	5.89991e-06	2.87859e-06		49.4411
		0.00219526	0.00235667	0.000542106	0.000298979	1	5.91813e-06	0.00025448	0.00085793	3.11056e-05	2.81086e-05	1.16451e-06	7.57963e-06	6.13279e-06	1.74042e-06		49.4389
		0.00199745	0.0020659	0.000569097	0.000337613	1	5.68438e-06	0.000269226	0.000974645	2.68991e-05	2.77611e-05	5.89929e-06	4.78973e-06	7.77079e-06	2.44117e-06		49.4366
		0.00210993	0.00199116	0.000562157	0.000342633	1	5.16112e-06	0.000271445	0.000964373	3.12187e-05	3.02846e-05	3.56542e-06	4.84082e-06	6.47356e-06	2.7554e-06		49.4343
		0.00201251	0.00194791	0.000606413	0.000322044	1	4.8034e-06	0.000288087	0.000998484	2.33064e-05	3.21088e-05	3.58898e-06	7.65747e-06	6.40949e-06	3.93408e-06		49.4321
		0.00223109	0.00202488	0.000758284	0.000342646	1	4.13042e-06	0.00029642	0.00113997	3.36801e-05	3.02908e-05	9.88534e-06	1.07295e-05	6.69565e-06	2.99899e-06		49.4298
		0.00212216	0.00203784	0.000712728	0.000388119	1	6.06019e-06	0.000330107	0.00109257	1.3798e-05	2.55444e-05	7.1882e-06	2.77681e-06	8.52336e-06	3.05531e-06		49.4275
		0.00200466	0.00199228	0.000718065	0.000348338	1	5.4838e-06	0.000327228	0.000945999	2.81879e-05	3.19708e-05	5.89069e-06	1.02492e-05	8.28395e-06	5.57006e-06		49.4253
		0.0020527	0.00201505	0.000875541	0.000372688	1	4.6875e-06	0.000364567	0.00105815	3.40357e-05	3.38467e-05	6.10583e-06	9.20694e-06	8.04285e-06	4.44514e-06		49.423
		0.00213396	0.00205365	0.000903779	0.000392952	1	6.28731e-06	0.000372822	0.00093824	2.60727e-05	3.52844e-05	1.0852e-05	1.1862e-05	9.31648e-06	3.21619e-06		49.4208
		0.00202257	0.00190936	0.000967	0.000417886	1	6.70811e-06	0.000394711	0.00169157	3.42073e-05	2.8642e-05	9.27431e-06	8.05293e-06	8.75434e-06	2.39411e-06		49.4185
		0.00208438	0.00199873	0.000972417	0.000383715	1	7.27385e-06	0.000572246	0.00115965	3.64538e-05	3.16974e-05	4.74536e-06	8.26653e-06	9.30384e-06	3.17532e-06		49.4162
		0.0022187	0.00211136	0.00100391	0.000405149	1	6.88906e-06	0.00039504	0.00124638	3.63112e-05	3.34069e-05	1.4506e-05	1.18836e-05	1.12656e-05	3.80472e-06		49.414
		0.00202145	0.00200129	0.00105066	0.000363132	1	7.562e-06	0.00040718	0.00105073	3.11009e-05	3.34454e-05	5.57933e-06	9.06029e-06	9.43594e-06	5.00591e-06		49.4117
		0.00207146	0.00205463	0.00109938	0.000412239	1	7.75374e-06	0.000431706	0.00100235	3.53202e-05	3.37797e-05	8.21854e-06	8.15934e-06	9.91403e-06	2.56742e-06		49.4095
		0.00201903	0.00198214	0.00110307	0.000412348	1	6.94296e-06	0.000439112	0.00121126	3.57485e-05	3.94948e-05	1.51896e-05	1.01334e-05	9.53874e-06	3.67696e-06		49.4072
		0.00189379	0.00190667	0.00105016	0.000466102	1	6.36745e-06	0.000451042	0.00120814	3.4929e-05	3.8537e-05	5.90764e-06	1.7132e-05	1.03068e-05	3.72969e-06		49.4049
		0.002106	0.00194006	0.00106358	0.000428433	1	6.78789e-06	0.000407301	0.000994284	3.32942e-05	3.75855e-05	1.2915e-05	1.08652e-05	9.58831e-06	5.2527e-06		49.4027
		0.00195249	0.00205279	0.0010321	0.000494604	1	6.16145e-06	0.000426437	0.000871785	4.15012e-05	3.58702e-05	1.06348e-05	9.57302e-06	1.186e-05	2.15449e-06		49.4004
		0.00197516	0.00205383	0.00106162	0.000406383	1	6.32702e-06	0.000465254	0.00126716	4.39773e-05	3.77281e-05	1.43469e-05	1.38277e-05	1.1142e-05	3.18674e-06		49.3982
		0.00199457	0.00204094	0.0010498	0.000419315	1	6.16245e-06	0.000440916	0.00112013	3.43243e-05	3.7121e-05	2.21427e-05	1.01007e-05	1.0025e-05	2.4023e-06		49.3959
		0.0019952	0.00200488	0.00102441	0.000399913	1	6.96337e-06	0.000448675	0.00105016	3.63365e-05	3.6166e-05	1.01219e-05	1.30165e-05	8.78955e-06	1.37259e-06		49.3936
		0.00197174	0.00179109	0.00106676	0.000431564	1	4.64424e-06	0.000450243	0.00117998	4.34684e-05	3.58322e-05	1.63004e-05	1.07693e-05	1.01238e-05	2.6817e-06		49.3914
		0.00199849	0.00198793	0.001063	0.000372325	1	3.91757e-06	0.000452271	0.00276625	3.98576e-05	4.13988e-05	1.17273e-05	8.14115e-06	1.01003e-05	3.26853e-06		49.3891
		0.00215987	0.0020985	0.00102109	0.000478919	1	5.46916e-06	0.000404672	0.00148927	4.30543e-05	4.25183e-05	1.01279e-05	1.02599e-05	1.11354e-05	2.91986e-06		49.3869
		0.00197132	0.00190102	0.000925589	0.000444124	1	5.53254e-06	0.000357185	0.00119512	3.57655e-05	3.86796e-05	1.09127e-05	1.40335e-05	1.20622e-05	3.23417e-06		49.3846
		0.00204254	0.0019291	0.000868474	0.000474815	1	5.35498e-06	0.000370998	0.000929127	4.2853e-05	4.06731e-05	1.36469e-05	1.00457e-05	1.12335e-05	3.30745e-06		49.3823
		0.00197312	0.00206244	0.000878163	0.000473083	1	5.60249e-06	0.00036224	0.000934182	3.34553e-05	3.98007e-05	1.35132e-05	9.23674e-06	1.16691e-05	3.12701e-06		49.3801
		0.00203154	0.00196431	0.000843937	0.000449608	1	4.30375e-06	0.000345265	0.0010723	3.3378e-05	3.88284e-05	1.4413e-05	7.63988e-06	8.74046e-06	2.47781e-06		49.3778
		0.00221397	0.00215697	0.000827179	0.000535091	1	5.88695e-06	0.000319491	0.000971709	4.16671e-05	4.32908e-05	1.26793e-05	8.06849e-06	1.06949e-05	3.53386e-06		49.3756
		0.00191576	0.00188987	0.00072699	0.000432059	1	4.7167e-06	0.000316871	0.00157607	3.5633e-05	4.36447e-05	1.47885e-05	1.14024e-05	1.10473e-05	2.24541e-06		49.3733
		0.00202329	0.00196275	0.000655295	0.000482119	1	5.65178e-06	0.00028941	0.000847888	3.59499e-05	4.34629e-05	1.5561e-05	7.6127e-06	1.22163e-05	3.33423e-06		49.371
		0.00185083	0.00194534	0.000600927	0.00051302	1	4.85882e-06	0.000288939	0.000983903	3.77756e-05	4.29415e-05	7.00542e-06	1.62387e-05	8.92989e-06	1.84984e-06		49.3688
		0.00181952	0.0018685	0.000556089	0.000418593	1	4.78025e-06	0.000227147	0.00107826	4.82166e-05	4.17232e-05	1.10722e-05	1.28112e-05	9.33935e-06	2.28514e-06		49.3665
		0.00206962	0.00195948	0.000522085	0.000484023	1	4.28606e-06	0.000211354	0.000902864	4.46595e-05	4.33923e-05	1.1437e-05	1.32332e-05	8.52956e-06	2.08472e-06		49.3643
		0.00193732	0.00188233	0.000482128	0.000455559	1	4.20267e-06	0.000219084	0.000799705	4.51945e-05	4.20908e-05	1.10503e-05	6.39433e-06	1.16687e-05	1.49849e-06		49.362
		0.00192994	0.0018544	0.00042901	0.000458654	1	4.49002e-06	0.000189141	0.00080086	5.35231e-05	4.66916e-05	1.19812e-05	7.6243e-06	1.02126e-05	2.0395e-06		49.3597
		0.0018336	0.00182569	0.000422833	0.000450183	1	3.23837e-06	0.000166512	0.000875493	5.48399e-05	4.47187e-05	4.65749e-06	8.78962e-06	9.33921e-06	1.56688e-06		49.3575
		0.00188546	0.00171602	0.000404352	0.000429428	1	3.53187e-06	0.000163163	0.00076212	3.71492e-05	4.07371e-05	8.88582e-06	1.4146e-05	8.68379e-06	1.35607e-06		49.3552
		0.00182658	0.00178064	0.000425152	0.000428544	1	3.69566e-06	0.000162936	0.000667161	4.39209e-05	4.52835e-05	1.43285e-05	9.66671e-06	1.01735e-05	1.16855e-06		49.353
		0.00192056	0.00177253	0.000411439	0.000425491	1	3.2083e-06	0.000161819	0.000769899	4.92656e-05	4.00395e-05	1.55172e-05	8.97156e-06	9.42656e-06	2.31826e-06		49.3507
		0.00184099	0.00187945	0.000411237	0.00042693	1	3.46008e-06	0.000163245	0.000810888	4.80528e-05	4.43084e-05	8.4827e-06	1.05272e-05	8.72411e-06	8.95294e-07		49.3484
		0.0018516	0.00188306	0.000400073	0.000446641	1	2.83929e-06	0.000165103	0.000924659	4.29776e-05	4.28722e-05	1.36865e-05	1.00749e-05	7.95141e-06	1.81763e-06		49.3462
		0.00183325	0.00177203	0.000404985	0.000477314	1	2.5816e-06	0.000160014	0.000853875	4.23331e-05	4.52804e-05	6.31674e-06	1.31888e-05	8.65813e-06	1.24e-06		49.3439
		0.0018405	0.00186864	0.000369254	0.000450514	1	3.89802e-06	0.000164226	0.000877746	5.41138e-05	4.37115e-05	1.13269e-05	1.0196e-05	1.07306e-05	2.44645e-06		49.3417
		0.00190443	0.00175614	0.000418818	0.000425557	1	2.70732e-06	0.000173904	0.000765466	4.24951e-05	3.97003e-05	1.35329e-05	1.56549e-05	9.93781e-06	1.64898e-06		49.3394
		0.0016837	0.00176559	0.00036692	0.000450119	1	2.77091e-06	0.000177801	0.000824046	4.11577e-05	3.89662e-05	7.02143e-06	1.08501e-05	7.90917e-06	2.27795e-06		49.3371
		0.00181541	0.001931	0.000415665	0.000460967	1	3.38911e-06	0.000167242	0.000697798	4.91375e-05	4.42019e-05	9.77898e-06	9.90646e-06	1.08605e-05	4.60434e-07		49.3349
		0.00175848	0.00175367	0.000436675	0.000398975	1	3.25549e-06	0.00019716	0.000835278	4.39277e-05	4.22028e-05	9.12541e-06	1.18858e-05	8.30964e-06	1.25506e-06		49.3326
		0.00173146	0.00173739	0.000416823	0.000470674	1	3.42189e-06	0.000200202	0.000822674	3.74023e-05	4.57502e-05	7.18642e-06	8.32864e-06	8.73437e-06	2.33148e-06		49.3304
		0.00184231	0.0018179	0.000424546	0.000413518	1	2.97357e-06	0.000198701	0.000910935	5.02205e-05	4.03461e-05	1.09414e-05	1.75885e-05	9.39324e-06	1.92345e-06		49.3281
		0.00170846	0.00163472	0.000409768	0.000457312	1	2.77475e-06	0.000173598	0.000693125	3.72905e-05	4.22492e-05	9.07226e-06	5.90803e-06	1.0378e-05	2.8891e-06		49.3258
		0.00168332	0.0015871	0.00041528	0.000431261	1	2.28255e-06	0.000165038	0.00064526	4.22655e-05	4.06493e-05	6.98663e-06	7.4223e-06	1.01492e-05	3.67265e-06		49.3236
		0.00172233	0.00182752	0.000462132	0.000370841	1	2.25601e-06	0.000187454	0.000905678	4.62707e-05	4.19604e-05	1.00528e-05	1.38213e-05	7.92572e-06	1.53417e-06		49.3213
		0.0017538	0.00166404	0.000456261	0.000455264	1	2.88285e-06	0.000197419	0.000948684	4.21346e-05	4.36794e-05	1.21955e-05	9.8773e-06	9.8535e-06	2.51696e-06		49.3191
		0.00160309	0.00167524	0.000468332	0.000483883	1	3.9599e-06	0.000211987	0.000770146	5.29106e-05	4.14839e-05	7.27789e-06	4.92006e-06	1.00327e-05	2.2147e-06		49.3168
		0.00174093	0.00175611	0.000470077	0.000504181	1	4.28185e-06	0.000208598	0.000894422	4.15395e-05	4.28311e-05	7.32107e-06	1.0606e-05	1.16123e-05	2.52247e-06		49.3145
		0.00171296	0.00173042	0.000465468	0.000450186	1	2.52233e-06	0.000189846	0.000891306	4.832e-05	4.17722e-05	1.11339e-05	1.07382e-05	9.44852e-06	2.40475e-06		49.3123
		0.00174779	0.00163647	0.00050307	0.000493637	1	6.00394e-06	0.000209271	0.000870712	5.34984e-05	4.13914e-05	6.12714e-06	1.06606e-05	1.09081e-05	3.72016e-06		49.31
		0.0018965	0.00180569	0.000744402	0.00045318	1	4.00751e-06	0.000231778	0.000857329	3.97166e-05	4.34069e-05	9.8307e-06	1.42273e-05	1.06994e-05	4.90939e-06		49.3077
		0.00173417	0.00178847	0.000576589	0.000494728	1	2.28894e-06	0.00023389	0.000864962	4.42226e-05	4.36312e-05	1.70979e-05	1.55328e-05	1.23539e-05	3.98984e-06		49.3055
		0.0016737	0.0015667	0.000565473	0.000472468	1	2.31471e-06	0.000224629	0.00094056	3.48795e-05	4.13743e-05	8.27075e-06	1.16328e-05	1.05024e-05	2.2986e-06		49.3032
		0.00185646	0.00173209	0.000609735	0.000464988	1	3.29746e-06	0.000241119	0.000876062	4.23605e-05	4.01267e-05	6.11507e-06	1.34771e-05	1.04509e-05	2.38268e-06		49.301
		0.00150302	0.00163736	0.000572119	0.000412404	1	2.27788e-06	0.000209537	0.000865228	4.08698e-05	4.04912e-05	1.0473e-05	1.01008e-05	1.04387e-05	3.10386e-06		49.2987
		0.00164198	0.00166273	0.000568179	0.000499577	1	2.0106e-06	0.000218842	0.00087256	4.64973e-05	4.34786e-05	1.29154e-05	4.07439e-06	1.11528e-05	3.41317e-06		49.2965
		0.00172371	0.00178667	0.000599612	0.000474966	1	3.30608e-06	0.00023252	0.000949182	3.90149e-05	4.39493e-05	1.72226e-05	8.5338e-06	9.27709e-06	1.64805e-06		49.2942
		0.00167861	0.00167997	0.000587997	0.000418572	1	3.53819e-06	0.000209852	0.000987281	4.18648e-05	4.43732e-05	1.17353e-05	3.39435e-06	9.79447e-06	4.54402e-06		49.2919
		0.00178514	0.00163006	0.000592676	0.000512326	1	3.83454e-06	0.000233164	0.00097762	5.18396e-05	4.19637e-05	9.9009e-06	1.07464e-05	1.20961e-05	2.10805e-06		49.2897
		0.00162703	0.00140479	0.000580819	0.000491909	1	4.63032e-06	0.000236682	0.000864661	3.28832e-05	3.8594e-05	6.8094e-06	1.18379e-05	8.47807e-06	3.16837e-06		49.2874
		0.00171529	0.00163625	0.000587727	0.000517995	1	3.70234e-06	0.000241047	0.000960023	4.02527e-05	4.31534e-05	5.81079e-06	1.14583e-05	1.01379e-05	3.52809e-06		49.2851
		0.00164519	0.00160643	0.000601287	0.000537441	1	3.33234e-06	0.000252849	0.000759283	4.24394e-05	3.73221e-05	1.59145e-05	6.57132e-06	1.1297e-05	4.94617e-06		49.2829
		0.00163417	0.001612	0.000628217	0.00051011	1	4.57661e-06	0.00025915	0.000916026	3.86073e-05	4.18868e-05	1.55476e-05	1.03722e-05	1.01882e-05	4.62818e-06		49.2806
		0.00173386	0.00165827	0.000673004	0.0005715	1	2.43158e-06	0.000276213	0.000976094	4.05439e-05	4.61048e-05	9.53735e-06	1.51832e-05	1.02742e-05	3.181e-06		49.2784
		0.00170629	0.00162461	0.000727326	0.000569782	1	6.29968e-06	0.000449482	0.000823831	3.98289e-05	4.08411e-05	1.52434e-05	1.01693e-05	1.26959e-05	3.68999e-06		49.2761
		0.00164052	0.00164903	0.000648747	0.000441045	1	4.93209e-06	0.000296557	0.000976907	3.12252e-05	3.86497e-05	9.90508e-06	8.91616e-06	1.08506e-05	3.06826e-06		49.2738
		0.0015502	0.00160546	0.000666423	0.000515261	1	4.80662e-06	0.00030642	0.000939689	4.79276e-05	4.12576e-05	8.57753e-06	9.93078e-06	1.07652e-05	3.76621e-06		49.2716
		0.00166184	0.00172588	0.000672947	0.000492573	1	5.59345e-06	0.000291114	0.000811511	3.23584e-05	4.25854e-05	1.04722e-05	1.01e-05	1.1265e-05	2.54242e-06		49.2693
		0.0016123	0.00153815	0.000861432	0.000597086	1	3.51658e-06	0.00029799	0.00086342	4.00671e-05	4.06967e-05	1.43908e-05	1.17893e-05	1.06437e-05	4.20802e-06		49.2671
		0.00161101	0.00156654	0.00068009	0.000456808	1	4.78832e-06	0.000297296	0.001035	4.43431e-05	3.89881e-05	1.08856e-05	8.81645e-06	1.00523e-05	4.34622e-06		49.2648
		0.0017259	0.00162938	0.000677607	0.000613733	1	3.97375e-06	0.000282577	0.000987044	5.2471e-05	4.21457e-05	1.18955e-05	1.10108e-05	1.01395e-05	2.88523e-06		49.2625
		0.00164102	0.00159461	0.000711583	0.000568041	1	3.92117e-06	0.000298018	0.00114234	4.15229e-05	3.75758e-05	1.26077e-05	7.95481e-06	8.85124e-06	3.05558e-06		49.2603
		0.00157884	0.00154201	0.000743806	0.000492791	1	4.34207e-06	0.000287818	0.000866727	4.35834e-05	4.27245e-05	1.89681e-05	8.90716e-06	9.99013e-06	2.30162e-06		49.258
		0.00162517	0.00154577	0.000759907	0.000587475	1	5.22546e-06	0.000289205	0.000992555	4.30468e-05	4.03305e-05	8.30659e-06	1.09959e-05	1.3292e-05	3.31093e-06		49.2558
		0.00158975	0.00166123	0.000781525	0.000564453	1	4.16619e-06	0.000308513	0.00098918	2.90565e-05	4.50164e-05	7.29276e-06	1.19738e-05	1.07021e-05	3.39328e-06		49.2535
		0.0016072	0.00168262	0.000822839	0.00055861	1	4.98021e-06	0.000322789	0.00105684	3.4001e-05	4.29342e-05	8.38209e-06	9.70879e-06	8.83357e-06	3.48552e-06		49.2512
		0.00161132	0.00152442	0.000893586	0.000556716	1	4.16721e-06	0.000335372	0.00100868	3.99106e-05	4.1516e-05	4.5297e-06	1.05214e-05	1.02946e-05	3.71614e-06		49.249
		0.00158635	0.00156788	0.000876089	0.000597029	1	3.85131e-06	0.000335296	0.000891999	4.08266e-05	4.19432e-05	1.18169e-05	1.57239e-05	1.08073e-05	3.57839e-06		49.2467
		0.00147928	0.00147959	0.000792449	0.000550552	1	4.90067e-06	0.000303045	0.000902627	4.62393e-05	4.03631e-05	1.36271e-05	1.37907e-05	9.67546e-06	3.16369e-06		49.2445
		0.00148933	0.00154091	0.000809288	0.000505559	1	4.22745e-06	0.000302398	0.000871018	3.51677e-05	4.2218e-05	1.80663e-05	8.48366e-06	9.41493e-06	3.82396e-06		49.2422
		0.00146551	0.00154859	0.000800055	0.000521159	1	3.89659e-06	0.000309868	0.00104986	4.31838e-05	4.06374e-05	1.13871e-05	1.25166e-05	1.07177e-05	3.1737e-06		49.2399
		0.00143167	0.00155986	0.000795979	0.000519072	1	3.75488e-06	0.000331704	0.000962608	4.43396e-05	3.99291e-05	1.0366e-05	8.66446e-06	8.69455e-06	4.46102e-06		49.2377
		0.00149315	0.00155659	0.000814763	0.000506575	1	2.72987e-06	0.000317039	0.000924958	3.53529e-05	3.69774e-05	8.07504e-06	1.00212e-05	8.71513e-06	2.80101e-06		49.2354
		0.00139219	0.00155022	0.000767597	0.000489712	1	4.13884e-06	0.000325248	0.000706409	4.31256e-05	3.8703e-05	9.93695e-06	8.94485e-06	8.04041e-06	4.14324e-06		49.2332
		0.00150728	0.001469	0.000806744	0.000504834	1	2.70424e-06	0.000327874	0.000815681	4.25619e-05	4.03924e-05	7.73299e-06	1.21561e-05	1.10968e-05	3.74888e-06		49.2309
		0.00142382	0.00138592	0.00099822	0.00051793	1	3.11736e-06	0.000322049	0.00101035	3.67136e-05	4.14802e-05	1.48878e-05	5.53261e-06	1.13235e-05	3.2179e-06		49.2286
		0.00155628	0.00141761	0.000845471	0.000625566	1	3.88067e-06	0.000348302	0.00106517	4.61962e-05	4.03984e-05	1.02036e-05	1.37778e-05	1.33945e-05	3.70757e-06		49.2264
		0.00149859	0.00141541	0.000823179	0.000539388	1	3.23536e-06	0.000299485	0.000915084	3.79149e-05	4.19418e-05	1.36178e-05	7.21839e-06	1.03742e-05	3.02478e-06		49.2241
		0.00151825	0.0013891	0.000872353	0.000484189	1	3.7192e-06	0.000318231	0.000944161	4.37268e-05	4.22198e-05	1.87441e-05	8.80195e-06	1.12238e-05	4.24961e-06		49.2219
		0.00149692	0.00150499	0.000862383	0.00050581	1	3.17863e-06	0.000317608	0.000858111	4.881e-05	0.000105646	1.53737e-05	1.36753e-05	9.75932e-06	3.72152e-06		49.2196
		0.00155661	0.00146383	0.000813386	0.00047264	1	2.99122e-06	0.000501171	0.00120538	3.19456e-05	4.28681e-05	9.77999e-06	1.34462e-05	1.29265e-05	3.4094e-06		49.2173
		0.00147409	0.0015122	0.000844076	0.000519028	1	3.73451e-06	0.000346454	0.00112589	4.37044e-05	4.45948e-05	9.64263e-06	1.11639e-05	1.08162e-05	4.37927e-06		49.2151
		0.00144424	0.00156854	0.000863647	0.000560097	1	2.40696e-06	0.000305687	0.000877753	3.41574e-05	4.39654e-05	9.44078e-06	1.29798e-05	1.31077e-05	3.00645e-06		49.2128
		0.00159556	0.00140883	0.000823307	0.000524175	1	2.39675e-06	0.000265454	0.000826607	4.12856e-05	4.29463e-05	1.52948e-05	1.90479e-05	1.19029e-05	2.9937e-06		49.2105
		0.00150806	0.00137689	0.000781283	0.000467117	1	2.40724e-06	0.000288641	0.000975032	4.94542e-05	4.41833e-05	1.47719e-05	1.05118e-05	1.42206e-05	3.98655e-06		49.2083
		0.00148954	0.00136083	0.000724029	0.00044827	1	3.05498e-06	0.000264081	0.000997466	5.42151e-05	3.82831e-05	9.92024e-06	1.91367e-05	1.07693e-05	2.27552e-06		49.206
		0.00160495	0.00148059	0.000769231	0.00049001	1	1.95571e-06	0.000267371	0.000934273	3.49545e-05	3.86909e-05	1.02734e-05	5.94481e-06	1.02397e-05	4.14587e-06		49.2038
		0.00148048	0.00143381	0.000763039	0.000532888	1	2.72118e-06	0.00028503	0.00118164	3.58266e-05	4.50022e-05	1.1922e-05	6.89687e-06	1.05857e-05	3.32279e-06		49.2015
		0.00144037	0.00150651	0.000686682	0.000524886	1	1.26368e-06	0.000248563	0.00098066	4.3795e-05	4.75293e-05	1.30943e-05	1.23932e-05	1.12016e-05	3.60393e-06		49.1992
		0.00142695	0.00146646	0.000642616	0.000475282	1	2.29438e-06	0.000245761	0.00103364	3.98472e-05	4.04827e-05	1.28996e-05	9.49566e-06	1.1035e-05	3.26768e-06		49.197
		0.00143326	0.00148497	0.000584708	0.000435342	1	2.66179e-06	0.000260347	0.000833257	4.02908e-05	4.28189e-05	8.15442e-06	9.44508e-06	7.04005e-06	3.53143e-06		49.1947
		0.00128446	0.00148897	0.000584448	0.000467635	1	1.1444e-06	0.000224466	0.000867645	3.63893e-05	4.31585e-05	9.33206e-06	4.05144e-06	6.42455e-06	1.70556e-06		49.1925
		0.0014199	0.00141504	0.000562884	0.000420355	1	1.8147e-06	0.000207951	0.000944446	3.64982e-05	4.09517e-05	7.0127e-06	2.03171e-06	8.21128e-06	2.69846e-06		49.1902
		0.00133836	0.00125078	0.000538918	0.000375829	1	1.65796e-06	0.000179312	0.000878153	4.85249e-05	4.26119e-05	6.76197e-06	9.79605e-06	8.11822e-06	2.0577e-06		49.188
		0.00140216	0.00129476	0.00052545	0.00043729	1	1.46451e-06	0.000397043	0.000840054	3.43306e-05	4.17534e-05	4.46897e-06	3.89243e-06	6.86952e-06	3.26074e-06		49.1857
		0.00142537	0.00135952	0.000524642	0.000426248	1	2.33484e-06	0.000184059	0.000910858	3.50663e-05	4.02889e-05	6.86133e-06	3.97584e-06	6.20295e-06	2.64022e-06		49.1834
		0.00142579	0.0013539	0.000542619	0.000479581	1	2.51459e-06	0.000193545	0.000945438	4.53968e-05	4.49785e-05	4.91615e-06	3.56822e-06	7.22824e-06	2.54607e-06		49.1812
		0.0014654	0.00153094	0.000535821	0.000427483	1	2.26298e-06	0.00018236	0.000813445	4.03287e-05	4.09624e-05	2.3891e-06	9.77208e-06	6.31948e-06	2.19929e-06		49.1789
		0.00139179	0.0015052	0.000556706	0.000433546	1	2.2178e-06	0.000200635	0.000854728	3.85359e-05	4.61022e-05	9.88253e-06	8.58105e-06	6.36445e-06	3.59414e-06		49.1767
		0.00141239	0.00152029	0.000585635	0.00045225	1	2.43272e-06	0.000188155	0.00301128	4.08518e-05	4.37235e-05	3.70762e-06	1.07874e-05	8.27732e-06	3.61455e-06		49.1744
		0.00136756	0.00151524	0.000534901	0.0004114	1	1.49139e-06	0.000173224	0.000737039	3.68872e-05	4.34756e-05	1.02753e-05	4.6245e-06	5.1702e-06	4.55965e-06		49.1721
		0.00145901	0.00139782	0.000531424	0.000427514	1	1.70914e-06	0.000171598	0.000670604	3.75884e-05	4.00325e-05	1.04706e-05	6.73215e-06	8.36884e-06	4.50603e-06		49.1699
		0.00140655	0.00148667	0.000575095	0.000405563	1	1.70214e-06	0.000188634	0.000813053	4.584e-05	4.52079e-05	7.34938e-06	9.93721e-06	7.62479e-06	4.15916e-06		49.1676
		0.00142243	0.00143611	0.000611046	0.000456555	1	1.65971e-06	0.000213412	0.000909964	5.00798e-05	4.24638e-05	7.16616e-06	4.84453e-06	7.11598e-06	3.91125e-06		49.1653
		0.00136375	0.00137266	0.000640775	0.000438873	1	2.25756e-06	0.00021143	0.000830924	4.31003e-05	3.99073e-05	6.91013e-06	8.67583e-06	7.7838e-06	4.88411e-06		49.1631
		0.00143408	0.0014181	0.000677338	0.000386187	1	2.10375e-06	0.000227397	0.000831043	4.24885e-05	4.33542e-05	1.99541e-05	5.42642e-06	5.41249e-06	5.52969e-06		49.1608
		0.00145218	0.00142751	0.000670733	0.000451829	1	1.71749e-06	0.000220175	0.000970332	4.04024e-05	4.09053e-05	5.8324e-06	9.47124e-06	7.68268e-06	4.95099e-06		49.1586
		0.00137969	0.00148213	0.00071318	0.000459918	1	2.76285e-06	0.000233667	0.000787979	4.69535e-05	4.18612e-05	7.00099e-06	7.43756e-06	6.32921e-06	4.1029e-06		49.1563
		0.0015887	0.00140532	0.000696197	0.000384877	1	2.72305e-06	0.000200233	0.000823086	4.3038e-05	3.9479e-05	5.74529e-06	5.33113e-06	8.89802e-06	5.57146e-06		49.154
		0.00136117	0.00143823	0.000655925	0.000442653	1	1.92096e-06	0.000204817	0.000781962	3.62252e-05	4.01685e-05	6.7179e-06	1.29766e-05	8.36415e-06	6.50609e-06		49.1518
		0.00158121	0.0014367	0.000678383	0.00046318	1	2.48946e-06	0.000222777	0.000921914	4.35694e-05	4.63373e-05	7.3157e-06	8.47846e-06	6.39681e-06	1.43027e-05		49.1495
		0.00151846	0.00142202	0.000686723	0.000431521	1	2.62175e-06	0.000204275	0.000939855	5.06662e-05	3.90699e-05	1.26379e-05	1.52841e-05	6.62812e-06	1.98271e-05		49.1473
		0.0014172	0.00159212	0.000615786	0.000463191	1	1.96281e-06	0.000238215	0.000937664	3.37926e-05	4.08962e-05	3.41784e-06	1.98871e-06	4.98455e-06	1.10702e-05		49.145
		0.00140876	0.00148986	0.000901836	0.00044169	1	2.9186e-06	0.000260703	0.000960815	2.92246e-05	4.15217e-05	7.82507e-06	9.71102e-06	8.74355e-06	8.38116e-06		49.1427
		0.00151988	0.00146374	0.000608376	0.000450605	1	1.66173e-06	0.000250372	0.000938833	4.29085e-05	3.81942e-05	7.91157e-06	7.2e-06	7.93573e-06	1.02477e-05		49.1405
		0.00144083	0.00156715	0.000639487	0.00044661	1	3.66192e-06	0.00025613	0.000790184	2.94457e-05	3.66018e-05	3.43693e-06	8.66639e-06	9.00355e-06	8.35246e-06		49.1382
		0.00147952	0.00147589	0.000673074	0.000482764	1	3.61481e-06	0.000271338	0.000806232	3.86613e-05	4.09615e-05	9.09449e-06	1.25037e-05	7.47324e-06	7.28479e-06		49.136
		0.00149593	0.0014018	0.000620122	0.000409605	1	1.66891e-06	0.000272595	0.000874773	4.08314e-05	4.08495e-05	8.60798e-06	9.96603e-06	6.7866e-06	7.67409e-06		49.1337
		0.00162851	0.00160897	0.000683395	0.000439708	1	3.8705e-06	0.000314239	0.00102327	2.95381e-05	3.78179e-05	1.13108e-05	7.19767e-06	9.03827e-06	8.33465e-06		49.1314
		0.00151077	0.00142223	0.000678301	0.000462294	1	3.49979e-06	0.000303039	0.00110368	3.81466e-05	4.20236e-05	5.78945e-06	1.27595e-05	8.24469e-06	7.57378e-06		49.1292
		0.00143062	0.00155751	0.0006801	0.000453529	1	3.10913e-06	0.000305219	0.00105789	5.39261e-05	3.97826e-05	1.19214e-05	8.96556e-06	8.67903e-06	7.34699e-06		49.1269
		0.00155396	0.00145033	0.00067062	0.000480091	1	2.59912e-06	0.000342566	0.00108869	3.81408e-05	4.4725e-05	5.88934e-06	5.46479e-06	9.54066e-06	1.14071e-05		49.1247
		0.00150124	0.00153901	0.000679979	0.000458642	1	4.86372e-06	0.000374499	0.000992437	3.64414e-05	4.23806e-05	1.26331e-05	1.39497e-05	6.4217e-06	7.90696e-06		49.1224
		0.00142744	0.00145381	0.00071486	0.000356933	1	4.28178e-06	0.000346901	0.000996024	2.9187e-05	3.87493e-05	1.05084e-05	7.43213e-06	1.08889e-05	7.62029e-06		49.1201
		0.00156123	0.00144639	0.00068607	0.000431982	1	3.16602e-06	0.000330608	0.000836183	4.59031e-05	3.56316e-05	9.13529e-06	1.05765e-05	8.42013e-06	1.04868e-05		49.1179
		0.0015103	0.00141065	0.000733284	0.000497928	1	3.41319e-06	0.000348266	0.00103917	3.75807e-05	4.12222e-05	1.28013e-05	6.05765e-06	8.57379e-06	1.18009e-05		49.1156
		0.00143807	0.00145788	0.000675491	0.000462162	1	5.24763e-06	0.000330287	0.000908863	3.58775e-05	3.75672e-05	7.76688e-06	7.06833e-06	9.86256e-06	1.03282e-05		49.1134
		0.00155811	0.00158907	0.000742984	0.000489905	1	3.95549e-06	0.000342055	0.00116462	4.2818e-05	3.94213e-05	6.76308e-06	6.53162e-06	7.61816e-06	1.06346e-05		49.1111
		0.00163178	0.00154635	0.000723658	0.000520441	1	4.53218e-06	0.00039099	0.000885025	3.02228e-05	4.09025e-05	4.81942e-06	1.1894e-05	8.26747e-06	1.08076e-05		49.1088
		0.00147567	0.00153377	0.00071181	0.000578561	1	4.26259e-06	0.000392828	0.00117087	5.02479e-05	6.97758e-05	7.28815e-06	1.26702e-05	9.29028e-06	1.20473e-05		49.1066
		0.00155114	0.00146786	0.000689188	0.000446961	1	3.99965e-06	0.000401986	0.000931382	3.73264e-05	4.1804e-05	7.17184e-06	1.10826e-05	7.7596e-06	1.2866e-05		49.1043
		0.00148808	0.00152318	0.000713748	0.000414879	1	3.98034e-06	0.000395658	0.00101879	3.88789e-05	4.0388e-05	1.04657e-05	1.07667e-05	1.15681e-05	9.97396e-06		49.102
		0.00149085	0.00152235	0.000712242	0.000465535	1	6.14852e-06	0.000446789	0.00108066	3.80978e-05	4.18653e-05	1.17949e-05	6.82337e-06	8.79652e-06	1.53782e-05		49.0998
		0.00136613	0.00147724	0.000741384	0.000503971	1	3.97452e-06	0.000426997	0.0011311	4.20878e-05	3.77881e-05	1.04504e-05	9.40701e-06	8.97166e-06	1.47229e-05		49.0975
		0.00153215	0.00143085	0.000815364	0.000461842	1	3.4535e-06	0.000439031	0.00112608	3.93484e-05	3.95122e-05	1.41326e-05	1.02156e-05	8.57048e-06	1.35023e-05		49.0953
		0.00145249	0.00142596	0.000752744	0.00045442	1	4.69473e-06	0.00239199	0.00107079	4.3941e-05	3.81886e-05	1.52984e-05	6.1234e-06	1.21147e-05	1.46246e-05		49.093
		0.00150179	0.00161231	0.000761537	0.00046893	1	4.52191e-06	0.000555555	0.0010548	3.61537e-05	4.05502e-05	1.29938e-05	1.36647e-05	8.28316e-06	1.51127e-05		49.0907
		0.00152364	0.00142622	0.000762241	0.000447328	1	3.44822e-06	0.000359436	0.0010149	3.82276e-05	3.75774e-05	1.02903e-05	1.19097e-05	8.83428e-06	1.38076e-05		49.0885
		0.0014957	0.00141292	0.000771137	0.000466888	1	4.06897e-06	0.000377469	0.00107923	3.73015e-05	3.75865e-05	1.13508e-05	8.53647e-06	8.56612e-06	1.54839e-05		49.0862
		0.00148449	0.00137649	0.000795423	0.000449592	1	4.05406e-06	0.000416921	0.00122351	2.70129e-05	3.56925e-05	5.5152e-06	6.39711e-06	8.83634e-06	1.60186e-05		49.084
		0.001592	0.00162521	0.000820265	0.000474313	1	5.89141e-06	0.000411751	0.00164062	4.09618e-05	3.60792e-05	6.98801e-06	1.21484e-05	8.07875e-06	1.46473e-05		49.0817
		0.00174152	0.00167128	0.000923333	0.000542433	1	4.46093e-06	0.000437385	0.00125511	3.10922e-05	3.97442e-05	7.28858e-06	1.1263e-05	1.12364e-05	1.89477e-05		49.0795
		0.00159594	0.00145812	0.000829442	0.000425195	1	3.72845e-06	0.000435495	0.00120735	4.43106e-05	3.84787e-05	1.20413e-05	9.75247e-06	1.01568e-05	1.4392e-05		49.0772
		0.00159631	0.00167358	0.000813678	0.000454813	1	4.79461e-06	0.000441208	0.00108528	3.53738e-05	3.61774e-05	1.17713e-05	1.2939e-05	1.11839e-05	1.33592e-05		49.0749
		0.0016971	0.00157676	0.000880719	0.000512749	1	4.18846e-06	0.000459282	0.00116322	2.5694e-05	3.8615e-05	1.25382e-05	1.08803e-05	1.28037e-05	1.68011e-05		49.0727
		0.00164136	0.00164804	0.000832537	0.000453869	1	6.3559e-06	0.000463789	0.00107918	3.60769e-05	3.70509e-05	8.3946e-06	9.02867e-06	8.52687e-06	1.42041e-05		49.0704
		0.00169189	0.0017016	0.00122666	0.000500629	1	6.01595e-06	0.000537605	0.00144109	3.60229e-05	3.89052e-05	1.03591e-05	1.42424e-05	8.97275e-06	1.59555e-05		49.0682
		0.00151789	0.00149861	0.000929022	0.000513784	1	3.77953e-06	0.000583919	0.00127792	3.01827e-05	3.20076e-05	1.35826e-05	9.16346e-06	9.34237e-06	1.21579e-05		49.0659
		0.00156916	0.00151782	0.000875364	0.000520481	1	6.07005e-06	0.000517809	0.00120782	3.17187e-05	3.63865e-05	1.16444e-05	8.75728e-06	8.89112e-06	1.462e-05		49.0636
		0.00163103	0.00159932	0.00096878	0.000457539	1	4.18724e-06	0.000523916	0.00108129	2.78528e-05	3.81937e-05	3.56475e-06	6.22283e-06	9.9754e-06	1.18344e-05		49.0614
		0.00164674	0.00159672	0.000933333	0.000465484	1	6.27862e-06	0.000536479	0.00112809	4.29614e-05	3.77617e-05	1.59156e-05	1.34494e-05	1.14076e-05	1.25578e-05		49.0591
		0.00172792	0.00173978	0.00103187	0.000555766	1	4.63498e-06	0.000507265	0.00129001	2.95175e-05	3.49099e-05	1.73279e-05	1.64574e-05	1.01028e-05	1.34397e-05		49.0568
		0.00165062	0.00162127	0.00107807	0.000504713	1	5.02521e-06	0.000520127	0.00136621	2.95475e-05	5.09549e-05	8.45782e-06	1.39954e-05	1.07399e-05	1.11011e-05		49.0546
		0.00167568	0.00160971	0.00105907	0.000485691	1	4.69874e-06	0.000532472	0.00110094	3.0029e-05	3.41485e-05	8.40225e-06	9.73214e-06	7.57416e-06	1.4362e-05		49.0523
		0.00165435	0.00166023	0.00105102	0.000463862	1	3.9361e-06	0.000517635	0.00132049	3.44362e-05	3.4643e-05	8.66107e-06	9.31527e-06	1.01178e-05	1.21149e-05		49.0501
		0.0016577	0.00172093	0.00104048	0.000492343	1	5.17434e-06	0.000559116	0.00123714	4.10327e-05	3.74088e-05	1.65243e-05	1.02888e-05	9.47417e-06	1.82489e-05		49.0478
		0.00172753	0.00169754	0.000987797	0.000495794	1	4.97894e-06	0.00054733	0.00130526	3.46661e-05	3.51366e-05	4.77581e-06	1.17864e-05	1.10669e-05	1.2589e-05		49.0455
		0.00158353	0.00168419	0.00103372	0.000530082	1	3.62402e-06	0.00052465	0.00115662	4.13251e-05	3.79104e-05	6.83117e-06	1.05561e-05	8.40389e-06	1.08793e-05		49.0433
		0.00170386	0.00160606	0.000983813	0.000487966	1	5.98382e-06	0.000518812	0.00127006	3.56984e-05	3.52388e-05	4.64702e-06	1.14685e-05	8.69673e-06	1.15462e-05		49.041
		0.00187095	0.00192273	0.0011286	0.000501145	1	4.64642e-06	0.000552449	0.0012789	3.09845e-05	3.60323e-05	1.11556e-05	1.43459e-05	1.05683e-05	1.06315e-05		49.0388
		0.00168488	0.00171833	0.00106344	0.000532802	1	6.45937e-06	0.00054971	0.0013572	3.13795e-05	4.14125e-05	1.32206e-05	1.45983e-05	9.81518e-06	1.14627e-05		49.0365
		0.00184752	0.0018438	0.00114653	0.000482725	1	3.9407e-06	0.000466957	0.00129645	3.63324e-05	3.2328e-05	1.01207e-05	1.04118e-05	1.00875e-05	8.28865e-06		49.0342
		0.00188539	0.00188337	0.00105622	0.000539668	1	4.50317e-06	0.000528878	0.00124703	3.60039e-05	3.41035e-05	1.4119e-05	1.08862e-05	9.81581e-06	9.80099e-06		49.032
		0.00181098	0.00173077	0.00105403	0.000474619	1	4.63248e-06	0.000482337	0.00118784	3.2936e-05	3.59522e-05	7.09621e-06	1.78201e-05	1.10451e-05	8.87245e-06		49.0297
		0.00173776	0.00175013	0.00112741	0.000545538	1	4.51051e-06	0.000530005	0.00116978	4.18148e-05	3.60714e-05	1.84704e-05	1.20999e-05	1.05963e-05	9.511e-06		49.0275
		0.00181336	0.00177543	0.00110486	0.000513456	1	4.76766e-06	0.000660559	0.00132884	2.99097e-05	3.42428e-05	1.17051e-05	1.08346e-05	1.07051e-05	1.20134e-05		49.0252
		0.00180737	0.0017461	0.00105199	0.000448334	1	4.7192e-06	0.000769209	0.00136816	3.34964e-05	3.35958e-05	7.94279e-06	7.22841e-06	9.8841e-06	1.67288e-05		49.0229
		0.00186261	0.00182111	0.00109049	0.000503035	1	5.11732e-06	0.000785169	0.00157118	3.22867e-05	3.29225e-05	4.72345e-06	9.59989e-06	9.78733e-06	1.33089e-05		49.0207
		0.00186923	0.00184452	0.00113078	0.000536622	1	4.74835e-06	0.000805613	0.00163671	4.49376e-05	3.71564e-05	1.48877e-05	1.14789e-05	1.14519e-05	1.36253e-05		49.0184
		0.00180263	0.00164428	0.00101999	0.000545805	1	4.46915e-06	0.000630169	0.0014295	2.71204e-05	3.2051e-05	7.1434e-06	1.51785e-05	9.52949e-06	1.2815e-05		49.0162
		0.00178259	0.00199424	0.00108387	0.000614084	1	6.38729e-06	0.000683012	0.00134852	3.25062e-05	3.0174e-05	7.45599e-06	8.64105e-06	1.07205e-05	7.97136e-06		49.0139
		0.00175711	0.00186655	0.00100611	0.000508812	1	6.71535e-06	0.000551588	0.00113885	4.25725e-05	3.26646e-05	1.21249e-05	1.12231e-05	1.00119e-05	7.32621e-06		49.0116
		0.00176389	0.00169029	0.000926809	0.000544687	1	5.06272e-06	0.000468747	0.0013764	3.38791e-05	3.41609e-05	1.09643e-05	1.12797e-05	1.01706e-05	6.18769e-06		49.0094
		0.00185988	0.00187005	0.000975097	0.000509789	1	4.0127e-06	0.000525743	0.00125289	3.67728e-05	3.63766e-05	8.39936e-06	1.18137e-05	1.17328e-05	7.11323e-06		49.0071
		0.00186489	0.0019184	0.00100538	0.000549725	1	5.97881e-06	0.000579028	0.00127599	3.81388e-05	3.01274e-05	1.10072e-05	1.0616e-05	1.0645e-05	6.21188e-06		49.0049
		0.00172196	0.00176219	0.00100887	0.000582879	1	4.79329e-06	0.00055055	0.00116548	3.89042e-05	3.50721e-05	8.57132e-06	1.3474e-05	1.05574e-05	8.14571e-06		49.0026
		0.00190711	0.00179183	0.00100643	0.000560895	1	4.99658e-06	0.000532936	0.00127791	3.0141e-05	3.40526e-05	5.88306e-06	1.02359e-05	2.25309e-05	5.27843e-06		49.0003
		0.00192484	0.00191945	0.00105631	0.000511119	1	4.82398e-06	0.000536945	0.00130551	2.49314e-05	3.50921e-05	1.28724e-05	6.70196e-06	1.10865e-05	7.00183e-06		48.9981
		0.00200111	0.00191065	0.000998358	0.000554686	1	5.19712e-06	0.000511539	0.00111729	2.9855e-05	3.41028e-05	4.98509e-06	1.15791e-05	1.1663e-05	3.33573e-06		48.9958
[truncated: 21,676 more rows]
