# Supplementary material for: A 4000-year long Late Holocene climate record from Hermes Cave (Peloponnese, Greece)
Source: Copernicus journal article supplement (doi:10.5194/cp-2020-47), 2020-05-07
Supplement: Supplementary file 1 [file cp-2020-47-supplement.zip › GH1705-IsotopeData.xls]

## Sheet: 1-251
KIT Carbonate Stable Isotope Analysis
Delta V mit Gasbench II
Powdersamples
GH 1705
internal reference material:			Carrara Marble, see folder Std
Analyses in bold are replicate analyses for check of reproducibility
Date	No.	Sample	d 13C/12C	SD	n	Average	SD	n	d 18O/16O	SD	n	Average	SD	n
			VDB						VPDB
11/06/18	1	SGH_1	-6.44	0.07	8				-6.9152	0.09	8
10/17/18	2	SGH_2	-7.5092	0.0586947	10				-7.1002	0.0782671	10
10/17/18	3	SGH_3	-8.1711	0.0624187	10				-7.0055	0.0768942	10
10/17/18	4	SGH_4	-8.2657	0.0469871	10				-7.1982	0.0449093	10
10/17/18	5	SGH_5	-8.6142	0.0264399	10				-7.1998	0.0481705	10
11/06/18	6	SGH_6	-8.5565	0.0305077	10				-7.2223	0.0669959	10
11/12/18	7	SGH_7	-7.9771	0.0401703	10				-7.2232	0.121093	10
10/17/18	8	SGH_8	-7.5268	0.0570551	10	-7.57825	0.0727613	2	-7.2149	0.0513408	10	-7.18865	0.0371231	2
11/15/18		SGH_8	-7.6297	0.0424213	10				-7.1624	0.0353088	10
11/13/18	9	SGH_9	-7.2788	0.0828731	10				-7.0298	0.0815255	10
10/17/18	10	SGH_10	-7.177	0.0531518	10				-7.0968	0.0570746	10
10/17/18	11	SGH_11	-7.0029	0.0489318	10				-7.0173	0.0522346	10
10/17/18	12	SGH_12	-7.0652	0.0438781	10				-6.9856	0.0507416	10
10/17/18	13	SGH_13	-7.8299	0.0255058	10				-6.9453	0.0329007	10
10/17/18	14	SGH_14	-8.1927	0.0400418	10				-6.959	0.0436628	10
10/17/18	15	SGH_15	-8.3417	0.0406941	10				-7.0135	0.0439779	10
10/17/18	16	SGH_16	-8.0738	0.0725133	10				-7.0226	0.0895956	10
10/17/18	17	SGH_17	-9.1085	0.0352491	10				-7.0408	0.0457185	10
10/17/18	18	SGH_18	-9.5025	0.040396	10				-6.8316	0.0505859	10
10/17/18	19	SGH_19	-9.5038	0.0710052	10				-7.0758	0.0808301	10
10/17/18	20	SGH_20	-8.7951	0.0443808	10				-7.0033	0.0555139	10
10/25/18	21	SGH_21	-8.8427	0.0608533	10				-7.0001	0.0461699	10
10/25/18	22	SGH_22	-9.8275	0.0448733	10				-7.0452	0.0624229	10
10/25/18	23	SGH_23	-9.8567	0.0247254	10				-6.9375	0.0497868	10
10/25/18	24	SGH_24	-9.1113	0.0436986	10				-7.0741	0.0355854	10
10/25/18	25	SGH_25	-9.2433	0.0645446	10				-6.8453	0.0736086	10
10/25/18	26	SGH_26	-9.4056	0.051032	10				-6.8937	0.0578255	10
10/25/18	27	SGH_27	-9.2728	0.0459874	10				-6.9638	0.0904873	10
10/25/18	28	SGH_28	-9.1018	0.0452838	10				-7.0776	0.0608974	10
10/25/18	29	SGH_29	-9.0134	0.0441291	10				-6.8849	0.0617386	10
10/25/18	30	SGH_30	-8.9857	0.0578735	10				-6.9737	0.0421823	10
10/25/18	31	SGH_31	-9.2212	0.0477209	10				-6.9537	0.0684691	10
11/06/18	32	SGH_32	-9.0061	0.0482112	10				-6.7983	0.0449099	10
10/25/18	33	SGH_33	-9.107	0.0347115	10				-7.0288	0.0328762	10
10/25/18	34	SGH_34	-9.1174	0.067132	10				-6.8644	0.0588807	10
11/06/18	35	SGH_35	-9.46	0.058258	9	-9.45965	0.000494975	2	-6.86211	0.104303	9	-6.80146	0.0857799	2
11/08/18		SGH_35	-9.4593	0.057608	10				-6.7408	0.0664978	10
11/12/18	36	SGH_36	-9.6128	0.0641886	10				-6.7669	0.0542923	10
11/12/18	37	SGH_37	-9.5629	0.0662712	10				-6.6647	0.0693831	10
11/06/18	38	SGH_38	-9.5496	0.0607531	10				-6.5921	0.0781017	10
10/25/18	39	SGH_39	-9.5191	0.0505491	10				-6.8863	0.049374	10
10/25/18	40	SGH_40	-9.3658	0.0574858	10				-6.984	0.0612155	10
11/06/18	41	SGH_41	-9.08756	0.0450086	9				-6.75978	0.0785776	9
11/06/18	42	SGH_42	-9.4762	0.0188786	10				-7.1875	0.075857	10
10/25/18	43	SGH_43	-9.4231	0.04895	10				-7.0928	0.0574742	10
10/25/18	44	SGH_44	-9.4602	0.0459246	10				-6.9901	0.0676551	10
11/12/18	45	SGH_45	-9.3274	0.0669016	10				-6.9482	0.102439	10
11/06/18	46	SGH_46	-9.2068	0.0393215	10				-6.9525	0.0333275	10
10/25/18	47	SGH_47	-9.1548	0.0242386	10				-7.0187	0.0581187	10
10/25/18	48	SGH_48	-9.2076	0.0431591	10				-6.994	0.0503521	10
10/25/18	49	SGH_49	-9.338	0.0653078	10				-6.824	0.063512	10
10/25/18	50	SGH_50	-9.5646	0.064395	10				-6.7757	0.0347437	10
10/25/18	51	SGH_51	-9.5706	0.0457996	10	-9.617	0.0656195	2	-6.6716	0.0819176	10	-6.6736	0.00282843	2
11/06/18		SGH_51	-9.6634	0.0451201	10				-6.6756	0.0681081	10
11/06/18	52	SGH_52	-9.2893	0.0367637	10				-6.8013	0.054681	10
11/06/18	53	SGH_53	-8.9692	0.0611806	10				-6.8512	0.0727916	10
11/06/18	54	SGH_54	-8.8762	0.0583206	10	-8.87675	0.000777817	2	-6.9335	0.0712496	10	-6.9416	0.0114551	2
11/12/18		SGH_54	-8.8773	0.0739159	10				-6.9497	0.08088	10
11/08/18	55	SGH_55	-9.4077	0.057737	10				-7.1649	0.091732	10
11/06/18	56	SGH_56	-9.5184	0.0433825	10				-6.5723	0.0396514	10
11/06/18	57	SGH_57	-9.6635	0.0713555	10				-6.7843	0.101488	10
10/25/18	58	SGH_58	-9.727	0.0476235	10	-9.70655	0.0289207	2	-6.8539	0.0507531	10	-6.8652	0.0159806	2
11/06/18		SGH_58	-9.6861	0.0558181	10				-6.8765	0.0512494	10
10/25/18	59	SGH_59	-9.62533	0.0519086	9	-9.67872	0.0754954	2	-6.70937	0.0423116	8	-6.79359	0.119094	2
11/06/18		SGH_59	-9.7321	0.0517418	10				-6.8778	0.0891451	10
11/06/18	60	SGH_60	-9.6967	0.0287443	10				-6.735	0.0533521	10
10/30/18	61	SGH_61	-9.5577	0.0368361	10				-6.5414	0.0630048	10
10/30/18	62	SGH_62	-9.4711	0.0348344	10	-9.4795	0.0118794	2	-6.377	0.0403072	10	-6.43465	0.0815294	2
11/15/18		SGH_62	-9.4879	0.0609708	10				-6.4923	0.0719723	10
11/06/18	63	SGH_63	-9.2662	0.0563911	10	-9.31205	0.0648417	2	-6.68333	0.0576411	9	-6.63157	0.0732091	2
11/12/18		SGH_63	-9.3579	0.0598358	10				-6.5798	0.108039	10
11/12/18	64	SGH_64	-9.1007	0.0672476	10	-9.14785	0.0666802	2	-6.5482	0.0638119	10	-6.5784	0.0427092	2
11/15/18		SGH_64	-9.195	0.0513853	10				-6.6086	0.0503018	10
10/30/18	65	SGH_65	-9.0109	0.0607627	10				-6.4387	0.0655812	10
10/30/18	66	SGH_66	-9.0367	0.0421823	10				-6.3233	0.0678922	10
10/30/18	67	SGH_67	-9.1743	0.0519552	10	-9.1687	0.0079196	2	-6.3962	0.0672224	10	-6.37275	0.0331633	2
11/12/18		SGH_67	-9.1631	0.0626213	10				-6.3493	0.0605054	10
10/30/18	68	SGH_68	-8.505	0.0401608	10				-6.8143	0.0373751	10
10/30/18	69	SGH_69	-7.7489	0.0565262	10				-6.8104	0.0759067	10
10/30/18	70	SGH_70	-8.0829	0.0273392	10				-6.8815	0.0532024	10
11/06/18	71	SGH_71	-8.7136	0.0373785	10				-6.9544	0.0257259	10
10/30/18	72	SGH_72	-9.222	0.0679559	10	-9.24895	0.0381131	2	-6.6448	0.0684167	10	-6.6152	0.0418607	2
11/15/18		SGH_72	-9.2759	0.0553021	10				-6.5856	0.0727174	10
11/13/18	73	SGH_73	-9.4357	0.0541316	10				-6.7779	0.0578455	10
10/30/18	74	SGH_74	-9.6415	0.0410183	10				-6.7376	0.0426516	10
10/30/18	75	SGH_75	-9.8256	0.0388078	10				-6.5686	0.0353182	10
11/06/18	76	SGH_76	-9.6978	0.0552747	10				-6.5855	0.0941468	10
11/06/18	77	SGH_77	-9.4886	0.0407464	10				-6.7122	0.0645184	10
10/30/18	78	SGH_78	-9.1472	0.0464251	10				-6.5079	0.0590187	10
10/30/18	79	SGH_79	-8.5943	0.0709006	10				-6.5532	0.077146	10
10/30/18	80	SGH_80	-8.8028	0.046797	10				-6.7332	0.0761399	10
10/30/18	81	SGH_81	-9.0936	0.0326231	10				-6.6069	0.0518383	10
10/30/18	82	SGH_82	-9.1549	0.0440314	10				-6.8806	0.0823842	10
10/30/18	83	SGH_83	-9.1283	0.0464305	10				-6.7026	0.0783357	10
10/30/18	84	SGH_84	-8.9432	0.0681824	10				-6.5574	0.0343485	10
10/30/18	85	SGH_85	-9.1623	0.061808	10				-6.4676	0.0539963	10
10/30/18	86	SGH_86	-9.4728	0.0262331	10				-6.786	0.0278328	10
11/12/18	87	SGH_87	-9.15312	0.057863	8	-9.18506	0.0451664	2	-6.72538	0.104684	8	-6.79454	0.0978105	2
11/13/18		SGH_87	-9.217	0.0501199	8				-6.8637	0.0888307	10
10/30/18	88	SGH_88	-9.1717	0.0704068	10				-6.5435	0.0517628	10
10/30/18	89	SGH_89	-9.3017	0.0625816	10				-6.733	0.0796548	10
10/30/18	90	SGH_90	-9.1111	0.0500099	10				-6.6785	0.0860223	10
10/31/18	91	SGH_91	-9.1528	0.0342079	10				-6.7059	0.0396581	10
10/31/18	92	SGH_92	-9.1064	0.042888	10				-6.7932	0.0500107	10
10/31/18	93	SGH_93	-9.071	0.0500178	10				-6.7954	0.0441241	10
10/31/18	94	SGH_94	-8.9805	0.0295494	10				-6.8612	0.043731	10
10/31/18	95	SGH_95	-8.7466	0.0170242	10				-6.7801	0.0375809	10
10/31/18	96	SGH_96	-9.1291	0.0560425	10				-6.7193	0.0345577	10
10/31/18	97	SGH_97	-9.7964	0.0593412	10				-6.4812	0.0388724	10
10/31/18	98	SGH_98	-9.9353	0.0495245	10	-9.93605	0.00106066	2	-6.4294	0.0380094	10	-6.44725	0.0252437	2
11/08/18		SGH_98	-9.9368	0.0478117	10				-6.4651	0.0898201	10
10/31/18	99	SGH_99	-9.9672	0.0506267	10				-6.4226	0.0522137	10
10/31/18	100	SGH_100	-9.9488	0.0507407	10				-6.7701	0.0483861	10
10/31/18	101	SGH_101	-9.8054	0.0340529	10				-6.8703	0.0537009	10
10/31/18	102	SGH_102	-9.3454	0.0591574	10				-6.9652	0.0451929	10
10/31/18	103	SGH_103	-9.0577	0.0287983	10				-7.0464	0.0282693	10
10/31/18	104	SGH_104	-9.1784	0.0529217	10				-6.8316	0.0330427	10
10/31/18	105	SGH_105	-9.6214	0.0214797	10				-6.8854	0.0326741	10
10/31/18	106	SGH_106	-9.8569	0.0381676	10				-7.0119	0.0435748	10
10/31/18	107	SGH_107	-9.9851	0.0240345	10				-7.0582	0.043698	10
10/31/18	108	SGH_108	-9.7914	0.064722	10	-9.7921	0.000989949	2	-6.7332	0.0789399	10	-6.69916	0.0481461	2
11/13/18		SGH_108	-9.7928	0.0534349	10				-6.66511	0.076535	9
10/31/18	109	SGH_109	-9.5199	0.0310929	10				-6.9583	0.0253993	10
11/08/18	110	SGH_110	-8.5723	0.0468877	10				-6.8954	0.0619179	10
10/31/18	111	SGH_111	-8.925	0.0387212	10				-6.9782	0.0587533	10
10/31/18	112	SGH_112	-9.4853	0.0746087	10				-6.6741	0.0433601	10
10/31/18	113	SGH_113	-9.5943	0.036818	10				-6.5315	0.0371132	10
10/31/18	114	SGH_114	-9.7291	0.0336995	10				-6.5263	0.0377567	10
10/31/18	115	SGH_115	-9.7037	0.0437443	10				-6.6434	0.0575562	10
10/31/18	116	SGH_116	-9.6817	0.0182455	10				-6.7149	0.0357536	10
10/31/18	117	SGH_117	-9.5525	0.0433852	10				-6.6384	0.0521477	10
10/31/18	118	SGH_118	-9.7438	0.031601	10				-6.6569	0.0239325	10
10/31/18	119	SGH_119	-9.7704	0.0177776	10				-6.7994	0.0255699	10
10/31/18	120	SGH_120	-9.6486	0.0501358	10				-6.7415	0.0601503	10
10/31/18	121	SGH_121	-9.6673	0.0314044	10				-6.942	0.0460917	10
10/31/18	122	SGH_122	-9.185	0.0529591	10				-6.8831	0.068221	10
10/31/18	123	SGH_123	-8.3394	0.0359419	10				-6.9218	0.0333327	10
10/31/18	124	SGH_124	-8.8401	0.0587148	10				-6.8697	0.0670175	10
10/31/18	125	SGH_125	-9.5358	0.0533621	10				-6.7637	0.0394745	10
10/31/18	126	SGH_126	-9.7002	0.0542521	10				-6.9616	0.0368124	10
10/31/18	127	SGH_127	-9.6701	0.0340961	10				-6.8959	0.0488932	10
10/31/18	128	SGH_128	-9.9032	0.042418	10				-6.8004	0.038454	10
10/31/18	129	SGH_129	-9.5617	0.0396206	10				-6.7613	0.0455633	10
10/31/18	130	SGH_130	-9.139	0.0288136	10	-9.125	0.019799	2	-6.6812	0.0474969	10	-6.7183	0.0524673	2
11/08/18		SGH_130	-9.111	0.0511295	10				-6.7554	0.0698319	10
11/02/18	131	SGH_131	-8.1649	0.0259805	10	-8.15725	0.0108187	2	-6.9782	0.0328661	10	-6.8785	0.140997	2
11/12/18		SGH_131	-8.1496	0.0365002	10				-6.7788	0.0452126	10
11/02/18	132	SGH_132	-8.3622	0.027864	10				-6.9553	0.0202103	10
11/13/18		SGH_133	-8.3455	0.0577759	10				-6.8729	0.0871416	10
11/02/18	134	SGH_134	-9.6049	0.0625326	10				-6.691	0.0682984	10
11/02/18	135	SGH_135	-9.8865	0.0491195	10				-6.829	0.0536987	10
11/02/18	136	SGH_136	-9.9005	0.0295193	10	-9.8962	0.00608112	2	-6.9555	0.0430458	10	-6.97265	0.0242538	2
11/13/18		SGH_136	-9.8919	0.0446728	10				-6.9898	0.0610788	10
11/02/18	137	SGH_137	-9.9001	0.0340896	10	-9.894	0.0086267	2	-6.6438	0.0426948	10	-6.6089	0.0493561	2
11/15/18		SGH_137	-9.8879	0.0466915	10				-6.574	0.0622504	10
11/02/18	138	SGH_138	-9.7275	0.0454734	10				-6.4624	0.0648626	10
11/02/18	139	SGH_139	-9.7017	0.0488195	10				-6.5926	0.04761	10
11/02/18	140	SGH_140	-9.7069	0.066226	10	-9.68775	0.0270822	2	-6.7622	0.03741	10	-6.7123	0.0705693	2
11/12/18		SGH_140	-9.6686	0.0504782	10				-6.6624	0.043541	10
11/02/18	141	SGH_141	-9.3858	0.0453059	10	-9.3849	0.00127279	2	-6.527	0.0473943	10	-6.48055	0.0656902	2
11/08/18		SGH_141	-9.384	0.0640607	10				-6.4341	0.0420356	10
11/02/18	142	SGH_142	-9.0067	0.0332835	10				-6.7647	0.0341469	10
11/02/18	143	SGH_143	-9.1507	0.0440405	10				-7.0262	0.041055	10
11/02/18	144	SGH_144	-9.5009	0.0522461	10				-7.0483	0.0493425	10
11/02/18	145	SGH_145	-9.5313	0.0302583	10	-9.52515	0.00869741	2	-6.5908	0.0443491	10	-6.5584	0.0458205	2
11/08/18		SGH_145	-9.519	0.0426589	10				-6.526	0.0568135	10
11/02/18	146	SGH_146	-9.5809	0.0411837	10				-6.8616	0.0491872	10
11/08/18	147	SGH_147	-9.5526	0.0456221	10				-6.926	0.0399833	10
11/02/18	148	SGH_148	-9.3978	0.0228074	10				-6.9896	0.042542	10
11/02/18	149	SGH_149	-9.3013	0.0306161	10				-7.0961	0.0393346	10
11/02/18	150	SGH_150	-8.9623	0.0546098	10				-6.9863	0.0626561	10
11/02/18	151	SGH_151	-8.8118	0.0248229	10				-6.9962	0.0415232	10
11/02/18	152	SGH_152	-8.6679	0.0442303	10				-6.9951	0.0412269	10
11/02/18	153	SGH_153	-8.7106	0.0366885	10				-7.157	0.0557813	10
11/02/18	154	SGH_154	-9.1759	0.048082	10				-6.9995	0.0508511	10
11/02/18	155	SGH_155	-9.4798	0.0325365	10				-6.8166	0.0432363	10
11/02/18	156	SGH_156	-9.6253	0.0208116	10				-6.8338	0.0410631	10
11/02/18	157	SGH_157	-9.7075	0.058329	10				-6.7424	0.0769332	10
11/02/18	158	SGH_158	-9.8481	0.0750888	10	-9.88544	0.0528052	2	-6.8324	0.0803329	10	-6.85935	0.0381131	2
11/06/18		SGH_158	-9.92278	0.0490835	9				-6.8863	0.0934547	10
11/02/18	159	SGH_159	-9.9459	0.049843	10				-6.7992	0.0602915	10
11/02/18	160	SGH_160	-9.8513	0.0206508	10				-6.6993	0.0261748	10
11/05/18	161	SGH_161	-9.6463	0.0629304	10	-9.6898	0.0615183	2	-6.7581	0.10195	10	-6.7565	0.00226274	2
11/06/18		SGH_161	-9.7333	0.0361388	10				-6.7549	0.0404597	10
11/06/18	162	SGH_162	-9.5172	0.0529377	10				-6.9444	0.0795043	10
11/05/18	163	SGH_163	-9.3332	0.0664761	10				-6.9236	0.0797373	10
11/05/18	164	SGH_164	-9.0491	0.0806645	10	-9.0516	0.00353553	2	-6.9485	0.109426	10	-7.0045	0.079196	2
11/06/18		SGH_164	-9.0541	0.0510587	10				-7.0605	0.0522436	10
11/05/18	165	SGH_165	-8.9387	0.057608	10				-7.1729	0.0566146	10
11/05/18	166	SGH_166	-8.83511	0.0467666	9	-8.85428	0.0271058	2	-7.17033	0.054254	9	-7.21422	0.0620683	2
11/06/18		SGH_166	-8.87344	0.0416026	9				-7.25811	0.0806682	9
11/05/18	167	SGH_167	-8.8807	0.0457336	10				-7.1421	0.0989876	10
11/05/18	168	SGH_168	-8.8999	0.0592555	10				-7.0104	0.0844514	10
11/05/18	169	SGH_169	-9.4299	0.0628021	10				-7.2674	0.093569	10
11/05/18	170	SGH_170	-9.6957	0.0540063	10				-6.7695	0.0667886	10
11/05/18	171	SGH_171	-9.958	0.0323694	10				-6.9551	0.0518405	10
11/05/18	172	SGH_172	-9.8407	0.0677135	10				-6.8042	0.0832424	10
11/05/18	173	SGH_173	-9.7894	0.0300415	10				-7.0243	0.0586857	10
11/05/18	174	SGH_174	-9.6162	0.0820363	10	-9.6535	0.0527502	2	-7.2222	0.101729	10	-7.19795	0.0342947	2
11/06/18		SGH_174	-9.6908	0.0391516	10				-7.1737	0.0519445	10
11/05/18	175	SGH_175	-9.6248	0.0259135	10				-7.1476	0.103569	10
11/05/18	176	SGH_176	-9.5771	0.0296964	10				-7.1041	0.0390739	10
11/05/18	177	SGH_177	-9.4395	0.0364882	10				-6.9038	0.0606919	10
11/05/18	178	SGH_178	-9.2825	0.0701384	10				-6.6322	0.0893343	10
11/05/18	179	SGH_179	-9.30237	0.0322974	8	-9.29764	0.00669984	2	-6.52612	0.0657646	8	-6.53306	0.00981111	2
11/06/18		SGH_179	-9.2929	0.0497269	10				-6.54	0.0741695	10
11/05/18	180	SGH_180	-9.2871	0.0505051	10				-6.6139	0.0901276	10
11/05/18	181	SGH_181	-9.2067	0.0344546	10				-7.0083	0.049726	10
11/05/18	182	SGH_182	-8.8028	0.0497076	10				-7.092	0.112132	10
11/06/18		SGH_182	-8.8467	0.0454363	10				-7.0842	0.0745532	10
11/06/18	183	SGH_183	-8.4961	0.0625912	10				-7.0031	0.0797962	10
11/06/18	184	SGH_184	-8.375	0.0705518	10				-7.4438	0.0480851	10
11/08/18	185	SGH_185	-8.4169	0.0645109	10				-7.3541	0.0666374	10
11/05/18	186	SGH_186	-8.5941	0.0379604	10	-8.6167	0.0319612	2	-7.4122	0.0430008	10	-7.3723	0.0564271	2
11/08/18		SGH_186	-8.6393	0.0331262	10				-7.3324	0.0504605	10
11/05/18	187	SGH_187	-8.9665	0.0335303	10				-7.0837	0.0395869	10
11/05/18	188	SGH_188	-9.3026	0.073185	10				-7.2042	0.0634924	10
11/05/18	189	SGH_189	-9.4467	0.0227501	10				-6.9721	0.0878224	10
11/05/18	190	SGH_190	-9.4776	0.0658773	10				-6.6299	0.0756534	10
11/05/18	191	SGH_191	-9.6698	0.0378353	10				-6.6527	0.038468	10
11/05/18	192	SGH_192	-10.0233	0.0393984	10				-6.8037	0.0444798	10
11/15/18		SGH_192	-10.1245	0.0352806	10				-6.8469	0.0439582	10
11/05/18	193	SGH_193	-10.1587	0.0656913	10				-6.6866	0.0824651	10
11/05/18	194	SGH_194	-10.2464	0.0269246	10				-6.2312	0.0586	10
11/05/18	195	SGH_195	-10.3193	0.0398052	10				-6.3049	0.051574	10
11/05/18	196	SGH_196	-10.3528	0.0593648	10				-6.3497	0.0968768	10
11/08/18		SGH_196	-10.3937	0.0396766	10				-6.2962	0.0368715	10
11/15/18	197	SGH_197	-10.4166	0.063139	9				-6.37067	0.0812542	9
11/05/18	198	SGH_198	-10.3505	0.0249054	10				-6.8776	0.0258938	10
11/05/18	199	SGH_199	-10.08	0.0567333	10				-6.9062	0.0912735	10
11/05/18	200	SGH_200	-10.0589	0.0721595	10				-6.9758	0.101368	10
11/07/18	201	SGH_201	-10.115	0.0517773	10				-7.006	0.0757819	10
11/07/18	202	SGH_202	-10.1158	0.0283659	10				-6.9559	0.0655294	10
11/07/18	203	SGH_203	-9.8897	0.0434768	10				-6.8971	0.0983706	10
11/07/18	204	SGH_204	-9.8648	0.0363312	10				-6.9069	0.0835137	10
11/07/18	205	SGH_205	-9.8645	0.051117	10				-6.9133	0.0541008	10
11/07/18	206	SGH_206	-9.713	0.0226961	10				-6.8672	0.0361902	10
11/07/18	207	SGH_207	-9.6917	0.0482518	10				-6.8393	0.0400751	10
11/07/18	208	SGH_208	-9.7508	0.0575978	10				-6.899	0.0680898	10
11/07/18	209	SGH_209	-9.7901	0.0430618	10				-7.0422	0.0399578	10
11/07/18	210	SGH_210	-9.643	0.0271825	10				-7.0122	0.0549966	10
11/08/18	211	SGH_211	-9.5532	0.0435043	10				-6.7206	0.0533087	10
11/07/18	212	SGH_212	-9.49578	0.0615849	9	-9.51019	0.0203804	2	-6.92678	0.0858527	9	-6.88349	0.0612197	2
11/08/18		SGH_212	-9.5246	0.0597554	10				-6.8402	0.0709613	10
11/08/18	213	SGH_213	-9.529	0.0407867	10				-6.8637	0.0431072	10
11/07/18	214	SGH_214	-9.523	0.0517709	10				-7.0581	0.063933	10
11/08/18	215	SGH_215	-9.5079	0.0746048	10				-7.1603	0.0695223	10
11/07/18	216	SGH_216	-9.3329	0.0517096	10				-7.0031	0.0426027	10
11/08/18	217	SGH_217	-9.2902	0.0270095	10	-9.27316	0.0240947	2	-6.9563	0.0292006	10	-6.9537	0.00367696	2
11/15/18		SGH_217	-9.25613	0.0716448	8				-6.9511	0.101465	10
11/07/18	218	SGH_218	-9.1849	0.0422964	10				-6.9651	0.0692073	10
11/07/18	219	SGH_219	-9.2865	0.0378484	10				-7.1523	0.0408168	10
11/07/18	220	SGH_220	-9.2702	0.0282481	10				-7.2551	0.0451256	10
11/07/18	221	SGH_221	-9.1749	0.0389885	10				-7.0291	0.0438874	10
11/07/18	222	SGH_222	-9.0721	0.0335607	10				-6.9329	0.0530628	10
11/07/18	223	SGH_223	-9.0954	0.0329788	10				-7.0727	0.0425782	10
11/08/18	224	SGH_224	-9.1977	0.043757	10				-7.1473	0.0542321	10
11/08/18	225	SGH_225	-9.2511	0.0232496	10				-7.0396	0.0339352	10
11/07/18	226	SGH_226	-9.3431	0.0630581	10				-7.0768	0.0577173	10
11/07/18	227	SGH_227	-9.4026	0.0509361	10				-7.0592	0.0645098	10
11/07/18	228	SGH_228	-9.4835	0.0664066	10				-7.05	0.0559027	10
11/07/18	229	SGH_229	-9.6501	0.0335011	10				-6.9351	0.0505491	10
11/07/18	230	SGH_230	-9.6514	0.0351606	10				-7.0182	0.0353673	10
11/07/18	231	SGH_231	-9.7388	0.0304113	10				-7.0023	0.0504668	10
11/07/18	232	SGH_232	-9.7181	0.0333082	10				-6.9161	0.0999271	10
11/07/18	233	SGH_233	-9.6644	0.0435436	10				-6.93	0.0599759	10
11/07/18	234	SGH_234	-9.718	0.0350967	10				-6.8981	0.0498853	10
11/07/18	235	SGH_235	-9.7657	0.0270639	10				-6.8919	0.0327362	10
11/07/18	236	SGH_236	-9.6833	0.0549142	10				-6.7997	0.0590086	10
11/07/18	237	SGH_237	-9.7931	0.0365831	10				-6.9876	0.0479634	10
11/07/18	238	SGH_238	-9.7476	0.0281472	10				-6.9003	0.0500579	10
11/07/18	239	SGH_239	-9.7161	0.0487635	10				-6.9485	0.0386731	10
11/07/18	240	SGH_240	-9.7229	0.062392	10				-7.1103	0.0578101	10
11/12/18	241	SGH_241	-9.6382	0.0402763	10	-9.67045	0.0456084	2	-6.7127	0.0736856	10	-6.74775	0.0495682	2
11/15/18		SGH_241	-9.7027	0.0513875	10				-6.7828	0.0421157	10
11/13/18	242	SGH_242	-9.78222	0.0436027	9				-7.16122	0.0557669	9
11/12/18	243	SGH_243	-9.5891	0.0406925	10	-9.56433	0.0350332	2	-6.8119	0.044097	10	-6.88845	0.108258	2
11/15/18		SGH_243	-9.53956	0.079933	9				-6.965	0.0872683	9
11/15/18	244	SGH_244	-9.5683	0.0833827	10				-6.9871	0.0801061	10
11/12/18	245	SGH_245	-9.4872	0.0700742	10	-9.5036	0.0231931	2	-6.9704	0.0849682	10	-6.958	0.0175362	2
11/15/18		SGH_245	-9.52	0.0501287	10				-6.9456	0.0641824	10
11/12/18	246	SGH_246	-9.4567	0.0459349	10				-6.9695	0.0407819	10
11/12/18	247	SGH_247	-9.3222	0.0403121	10				-6.9633	0.0480302	10
11/12/18	248	SGH_248	-9.1517	0.0181662	10				-7.0057	0.0275118	10
11/12/18	249	SGH_249	-9.1075	0.0521009	10	-9.09305	0.0204354	2	-7.13556	0.0726621	9	-7.14648	0.0154464	2
11/13/18		SGH_249	-9.0786	0.0628529	10				-7.1574	0.0669448	10
11/12/18	250	SGH_250	-8.90556	0.0423855	9	-8.88428	0.0300913	2	-7.03	0.0701855	8	-7.02129	0.0123239	2
11/13/18		SGH_250	-8.863	0.0503256	7				-7.01257	0.0666355	7
11/12/18	251	SGH_251	-8.6595	0.0611941	10				-6.9952	0.0792868	10

## Sheet: Std
Date	No.all	No.		Standard	d 13C/12C	SD	n	d 18O/16O	SD	n
					VDB			VPDB
10/17/18	1	1	intern	Carrara	2.5025	0.0291786	10	-0.8742	0.0423656	10
10/17/18	2	2	intern	Carrara	2.5206	0.0267881	10	-0.8367	0.0358703	10
10/17/18	3	3	intern	Carrara	2.5109	0.0297824	10	-0.8992	0.039296	10
10/17/18	4	4	intern	Carrara	2.5245	0.0451817	10	-0.9145	0.0485094	10
10/17/18	5	5	intern	Carrara	2.5322	0.0310512	10	-0.8873	0.0367455	10
10/17/18	6	6	intern	Carrara	2.4698	0.0152155	10	-0.9034	0.0346993	10
10/17/18	7	7	intern	Carrara	2.5798	0.066866	10	-0.9702	0.0767909	10
10/17/18	8	8	intern	Carrara	2.5433	0.0338725	10	-0.8814	0.0423771	10
					2.52295	0.0319103	8	-0.895863	0.03816	8
10/25/18	9	1	intern	Carrara	2.4928	0.0183775	10	-0.8774	0.0282654	10
10/25/18	10	2	intern	Carrara	2.4806	0.0400949	10	-0.9234	0.0359667	10
10/25/18	11	3	intern	Carrara	2.5258	0.0353955	10	-0.9177	0.0506141	10
10/25/18	12	4	intern	Carrara	2.4979	0.0221332	10	-0.914	0.0445147	10
10/25/18	13	5	intern	Carrara	2.5177	0.0321595	10	-0.8919	0.0566087	10
10/25/18	14	6	intern	Carrara	2.53067	0.0612679	9	-0.9039	0.0559394	10
10/25/18	15	7	intern	Carrara	2.51262	0.0382956	10	-0.8685	0.0783272	8
10/25/18	16	8	intern	Carrara	2.5344	0.0542816	10	-0.9077	0.069335	10
10/25/18	17	9	intern	Carrara	2.5442	0.0570843	10	-0.9124	0.0691009	10
10/25/18	18	10	intern	Carrara	2.5676	0.054443	10	-0.9345	0.0922957	10
10/25/18	19	11	intern	Carrara	2.53778	0.0654767	9	-0.9188	0.0549642	10
10/25/18	20	12	intern	Carrara	2.46062	0.0351159	8	-0.873375	0.0689595	8
					2.51689	0.0298053	12	-0.903631	0.0212091	12
10/30/18	21	1	intern	Carrara	2.5684	0.0511864	10	-1.0953	0.0565883	10
10/30/18	22	2	intern	Carrara	2.4759	0.0386967	10	-0.835	0.0554377	10
10/30/18	23	3	intern	Carrara	2.5217	0.0514696	10	-0.823	0.0804998	10
10/30/18	24	4	intern	Carrara	2.5252	0.0433277	10	-0.7823	0.0581436	10
10/30/18	25	5	intern	Carrara	2.5621	0.0548198	10	-0.8415	0.0538315	10
10/30/18	26	6	intern	Carrara	2.5448	0.0261483	10	-0.8176	0.0461717	10
10/30/18	27	7	intern	Carrara	2.4977	0.0610975	10	-0.947	0.0687168	10
10/30/18	28	8	intern	Carrara	2.5568	0.0503583	10	-0.8144	0.0602443	10
10/30/18	29	9	intern	Carrara	2.5008	0.0451954	10	-1.0941	0.0675318	10
10/30/18	30	10	intern	Carrara	2.5229	0.0366134	10	-0.921	0.0423635	10
10/30/18	31	11	intern	Carrara	2.5169	0.0433088	10	-0.9181	0.0348503	10
10/30/18	32	12	intern	Carrara	2.4894	0.031532	10	-0.9287	0.0550899	10
					2.52355	0.0297384	12	-0.9015	0.104941	12
10/31/18	33	1	intern	Carrara	2.504	0.0481156	10	-0.9	0.0714018	10
10/31/18	34	2	intern	Carrara	2.5494	0.0377983	10	-0.8323	0.0506361	10
10/31/18	35	3	intern	Carrara	2.5092	0.0410279	10	-0.8475	0.0715017	10
10/31/18	36	4	intern	Carrara	2.5232	0.0447705	10	-0.8803	0.0487671	10
10/31/18	37	5	intern	Carrara	2.5266	0.0259452	10	-0.7634	0.02944	10
10/31/18	38	6	intern	Carrara	2.5339	0.0225805	10	-0.8129	0.0341222	10
10/31/18	39	7	intern	Carrara	2.4826	0.0513597	10	-0.9475	0.0313519	10
10/31/18	40	8	intern	Carrara	2.5345	0.045167	10	-1.1476	0.0658773	10
10/31/18	41	9	intern	Carrara	2.4736	0.0205815	10	-0.8833	0.0300483	10
10/31/18	42	10	intern	Carrara	2.5323	0.0267584	10	-0.8894	0.0404947	10
10/31/18	43	11	intern	Carrara	2.5144	0.030119	10	-1.0043	0.0315843	10
10/31/18	44	12	intern	Carrara	2.5573	0.0478633	10	-0.92	0.0670588	10
10/31/18	45	13	intern	Carrara	2.4717	0.0234996	10	-0.8994	0.0376215	10
10/31/18	46	14	intern	Carrara	2.6126	0.0660357	10	-0.823	0.0629885	10
10/31/18	47	15	intern	Carrara	2.5289	0.0443883	10	-0.9074	0.0540025	10
					2.52361	0.0354672	15	-0.89722	0.0906617	15
11/02/18	48	1	intern	Carrara	2.583	0.0583076	10	-0.809	0.0351789	10
11/02/18	49	2	intern	Carrara	2.5122	0.00942573	10	-0.9057	0.0359816	10
11/02/18	50	3	intern	Carrara	2.4911	0.0216972	10	-0.8944	0.0275286	10
11/02/18	51	4	intern	Carrara	2.515	0.0337968	10	-0.808	0.0432024	10
11/02/18	52	5	intern	Carrara	2.5248	0.0274663	10	-0.8584	0.0434286	10
11/02/18	53	6	intern	Carrara	2.5271	0.048301	10	-0.8875	0.0408745	10
11/02/18	54	7	intern	Carrara	2.515	0.0369895	10	-0.9625	0.0332775	10
11/02/18	55	8	intern	Carrara	2.546	0.0760847	10	-0.9582	0.0500062	10
11/02/18	56	9	intern	Carrara	2.5066	0.0392632	10	-0.9612	0.0625634	10
11/02/18	57	10	intern	Carrara	2.4982	0.0223796	10	-0.9432	0.0181341	10
11/02/18	58	11	intern	Carrara	2.5241	0.0214085	10	-0.9512	0.0359221	10
					2.5221	0.0250751	11	-0.903573	0.0583797	11
11/05/18	59	1	intern	Carrara	2.4815	0.0347571	10	-0.8778	0.0337698	10
11/05/18	60	2	intern	Carrara	2.5572	0.0623321	10	-0.8	0.07406	10
11/05/18	61	3	intern	Carrara	2.5048	0.0394428	10	-0.853	0.054152	10
11/05/18	62	4	intern	Carrara	2.5219	0.0456544	10	-0.8291	0.0615945	10
11/05/18	63	5	intern	Carrara	2.4887	0.0262681	10	-0.8438	0.0458204	10
11/05/18	64	6	intern	Carrara	2.4985	0.0472093	10	-1.0236	0.102617	10
11/05/18	65	7	intern	Carrara	2.5982	0.0748774	10	-0.893444	0.0737786	9
11/05/18	66	8	intern	Carrara	2.505	0.0629109	10	-0.963	0.0697089	10
11/05/18	67	9	intern	Carrara	2.471	0.0296236	10	-1.0607	0.0458453	10
11/05/18	68	10	intern	Carrara	2.514	0.0310161	10	-0.8399	0.0384692	10
11/05/18	69	11	intern	Carrara	2.5594	0.0545694	10	-0.8502	0.0869071	10
11/05/18	70	12	intern	Carrara	2.5167	0.0367848	10	-0.9218	0.0446139	10
					2.51808	0.0367284	12	-0.896362	0.0811334	12
11/06/18	71	1	intern	Carrara	2.5451	0.0352403	10	-0.7921	0.0654717	10
11/06/18	72	2	intern	Carrara	2.5244	0.0344777	10	-0.8543	0.0793698	10
11/06/18	73	3	intern	Carrara	2.5761	0.066749	10	-0.7529	0.0637799	10
11/06/18	74	4	intern	Carrara	2.4667	0.071776	10	-0.9716	0.0669049	10
11/06/18	75	5	intern	Carrara	2.4772	0.0231363	10	-0.894	0.0626525	10
11/06/18	76	6	intern	Carrara	2.5667	0.0554097	10	-0.8208	0.0493351	10
11/06/18	77	7	intern	Carrara	2.4771	0.0294296	10	-1.0392	0.0500706	10
11/06/18	78	8	intern	Carrara	2.4977	0.0538806	10	-0.9314	0.0986849	10
11/06/18	79	9	intern	Carrara	2.5444	0.0650115	10	-0.8474	0.0688803	10
11/06/18	80	10	intern	Carrara	2.5853	0.0545935	10	-1.0191	0.106808	10
11/06/18	81	11	intern	Carrara	2.4841	0.0577974	10	-0.9483	0.0927842	10
11/06/18	82	12	intern	Carrara	2.567	0.0598906	10	-0.9132	0.073899	10
11/06/18	83	13	intern	Carrara	2.4698	0.0554533	10	-0.9449	0.132602	10
11/06/18	84	14	intern	Carrara	2.4838	0.0269436	10	-0.8935	0.0471458	10
					2.51896	0.0439934	14	-0.901621	0.0825774	14
11/06/18		1	RM	CO_1	2.4484	0.0567787	10	-2.4151	0.0676863	10
11/07/18	85	1	intern	Carrara	2.4394	0.0252155	10	-0.9756	0.0677253	10
11/07/18	86	2	intern	Carrara	2.5538	0.0499884	10	-0.8849	0.103521	10
11/07/18	87	3	intern	Carrara	2.4949	0.0364462	10	-0.8956	0.0815982	10
11/07/18	88	4	intern	Carrara	2.5035	0.0313519	10	-0.8716	0.0575774	10
11/07/18	89	5	intern	Carrara	2.5322	0.0602325	10	-0.8306	0.071084	10
11/07/18	90	6	intern	Carrara	2.55	0.0462793	10	-0.7948	0.0826731	10
11/07/18	91	7	intern	Carrara	2.4852	0.0383719	10	-1.1033	0.0400418	10
11/07/18	92	8	intern	Carrara	2.5815	0.0523562	10	-0.8321	0.0456252	10
11/07/18	93	9	intern	Carrara	2.5412	0.036098	10	-0.8506	0.0567787	10
11/07/18	94	10	intern	Carrara	2.4824	0.0420508	10	-0.9516	0.0611614	10
11/07/18	95	11	intern	Carrara	2.4945	0.0494823	10	-1.0168	0.0498036	10
11/07/18	96	12	intern	Carrara	2.5255	0.0492798	10	-0.9005	0.0533651	10
11/07/18	97	13	intern	Carrara	2.52525	0.0623258	8	-0.8505	0.0718769	8
11/07/18	98	14	intern	Carrara	2.5181	0.0690176	10	-0.9231	0.0900203	10
11/07/18	99	15	intern	Carrara	2.5249	0.0402615	10	-0.7686	0.0478428	10
					2.51682	0.0348781	15	-0.89668	0.0875964	15
11/12/18	100	1	intern	Carrara	2.5282	0.0518198	10	-0.8591	0.0504126	10
11/12/18	101	2	intern	Carrara	2.55	0.0807697	9	-0.747333	0.0756307	9
11/12/18	102	3	intern	Carrara	2.5101	0.0522312	10	-0.8416	0.0449968	10
11/12/18	103	4	intern	Carrara	2.50762	0.0847651	9	-0.895125	0.0663657	8
11/12/18	104	5	intern	Carrara	2.4595	0.0238059	10	-0.9951	0.0806645	10
11/12/18	105	6	intern	Carrara	2.49444	0.0679598	9	-1.00656	0.124952	10
11/12/18	106	7	intern	Carrara	2.5308	0.0484718	10	-0.987	0.0860145	9
11/12/18	107	8	intern	Carrara	2.4907	0.0252281	10	-0.9541	0.0419853	10
11/12/18	108	9	intern	Carrara	2.5452	0.0827054	10	-0.9549	0.0937081	10
11/12/18	109	10	intern	Carrara	2.5469	0.0607389	10	-0.7615	0.0673123	10
					2.51635	0.0293107	10	-0.900231	0.0951629	10
11/13/18	110	1	intern	Carrara	2.5116	0.0305985	10	-0.9139	0.0438012	10
11/13/18	111	2	intern	Carrara	2.4952	0.0417421	10	-0.9824	0.0493473	10
11/13/18	112	3	intern	Carrara	2.5557	0.0338101	10	-0.8122	0.0865959	10
					2.52083	0.031289	3	-0.902833	0.085638	3
11/15/18	113	1	intern	Carrara	2.542	0.0602698	10	-0.8316	0.0627786	10
11/15/18	114	2	intern	Carrara	2.56933	0.0722201	9	-0.874	0.0749874	10
11/15/18	115	3	intern	Carrara	2.5357	0.0699413	10	-0.8436	0.0767206	10
11/15/18	116	4	intern	Carrara	2.4793	0.0675772	10	-0.8227	0.11929	10
11/15/18	117	5	intern	Carrara	2.509	0.0656963	10	-0.8898	0.0843482	10
11/15/18	118	6	intern	Carrara	2.4633	0.0297809	10	-1.0762	0.0458689	10
11/15/18	119	7	intern	Carrara	2.5253	0.0444498	10	-0.9769	0.0808228	10
					2.5177	0.0368507	7	-0.902114	0.0926855	7
