# Supplementary material for: A 4000-year long Late Holocene climate record from Hermes Cave (Peloponnese, Greece)
Source: Copernicus journal article supplement (doi:10.5194/cp-2020-47), 2020-05-07
Supplement: Supplementary file 1 [file GH1705-ClumpedIsotopeData.xlsx]

## Sheet: Tabelle1
Clumped Isotope Analysis																					using an acid-fractionation correction of 0.069 permil
Heidelberg University
Thermo Fisher MAT 253 Plus
		EG: equilibrated gas, ETH: ETH carbonate stds.	raw	raw	raw	raw	raw	raw	raw	VPDB	raw	VPDB	mV	mV
lab code	Date	Sample/Standard	D47	d47	D48	d48	D49	49/44	d13C	d13C cal	d18O	d18O cal	47.5 sample	47.5 ref	M_18 [mV]	M_40 [mV]	M_30 [mV]	M_14 [mV]	M_30/M_44	D47 abs	D47abs-carb	Evaluation interval		ETF for Interval
20013	16.11.2018	Marble-Richter-131118	-0.460883	11.7053	0.44329	12.0248	14.5635	0.752428	2.03986	2.2061	37.2349	-1.77232	-170.571	-171.969	347.79	15.52	106.58	74.99	0.0184227	0.328805	0.397805	1		1: slope: 1.1222; intercept: 0.8460
20021	19.11.2018	EG-IX-12112018	0.198251	-25.2432	0.564835	9.88763	103.308	2.32824	-35.437	-35.2708	36.1567	-4.86136	-101.595	-103.479	426.34	15.66	105.94	75.07	0.0181981	1.06848		1
20029	19.11.2018	ETH2-191118	-0.600378	-17.497	-0.141312	-22.3417	-7.92556	-0.902273	-10.1994	-10.0332	19.7787	-18.705	-101.54	-103.023	351.08	10.99	107.51	67.56	0.0183682	0.172266	0.241266	1
20061	20.11.2018	ETH3-161118	-0.238593	11.5018	-0.538315	11.0616	-18.581	0.00524686	1.58416	1.7504	37.2512	-1.75653	-103.762	-103.03	343.52	1.89	111.32	54.91	0.0188963	0.578256	0.647256	1
20101	20.11.2018	ETH-2-201118	-0.58688	-17.8868	-0.547791	-23.1275	-12.2939	-1.21664	-10.4128	-10.2466	19.5763	-18.9013	-103	-103.285	440.83	2.52	116.83	59.05	0.0199827	0.187413	0.256413	1
20109	21.11.2018	ETH3-161118	-0.212249	11.5599	-0.904754	10.7325	-20.9296	-0.0919791	1.59465	1.7609	37.2725	-1.73586	-102.856	-103.247	315.85	2.32	109.61	54.5	0.0188361	0.607819	0.676819	1
20125	21.11.2018	ETH4	-0.329533	-17.8418	-0.152243	-23.0693	0.244319	-0.859379	-10.4543	-10.2881	19.4049	-19.0676	-101.801	-101.436	432.92	3.78	114.89	58.46	0.0197135	0.476203	0.545203	1
20157	22.11.2018	ETH1	-0.566556	10.6395	117.289	128.67	37.153	1.7274	1.78248	1.94873	36.5218	-2.4641	-103.755	-103.646	489.74	6.49	113.05	63.98	0.0191782	0.21022	0.27922	1
20197	22.11.2018	ETH3	-0.211409	11.3304	-0.899909	10.5176	-39.9873	-0.692273	1.47314	1.63939	37.1599	-1.84508	-102.8	-102.874	329.6	2.37	109.75	55.35	0.0185611	0.608761	0.677761	1
20205	23.11.2018	Marble_Richter-131118	-0.488332	11.5583	0.621328	12.0057	-4.38747	0.36747	2.02161	2.18786	37.1328	-1.8714	-102.775	-103.688	296.79	7.15	104.82	59.85	0.0181659	0.298002	0.367002	1
20245	24.11.2018	ETH3-161118	-0.192177	11.6731	-0.513802	11.2513	-4.88105	0.332308	1.62553	1.79178	37.3358	-1.67451	-103.737	-105.146	301.33	3.32	109.47	55.42	0.0187842	0.630343	0.699343	1
20253	24.11.2018	ETH3-161118 II	-0.198666	11.7164	-0.488785	11.3459	-11.4503	0.118698	1.64046	1.8067	37.3713	-1.64002	-101.314	-103.809	285.72	2.67	107.23	54.1	0.018686	0.62306	0.69206	1
20261	26.11.2018	ETH2-191118	-0.570024	-17.5501	0.0309998	-22.2785	14.0405	-0.436545	-10.2297	-10.0635	19.7238	-18.7583	-104.888	-106.042	309.57	7.19	105.29	60.78	0.0183633	0.206328	0.275328	1
20309	27.11.2018	Marble-Richter-131118	-0.452506	11.5628	0.900215	12.2624	13.0378	1.0099	2.00218	2.16843	37.1199	-1.88394	-102.685	-103.947	353.75	12.64	103.93	66.8	0.0181926	0.338206	0.407206	1
20358	28.11.2018	ETH1	-0.579292	10.5324	64.596	75.3071	0.658948	0.542726	1.75103	1.91728	36.4577	-2.52626	-98.1823	-97.8607	321.92	2.02	117.03	56.78	0.0199761	0.195928	0.264928	1
20366	28.11.2018	ETH1 II	-0.53968	10.5546	42.0685	52.5261	-8.1673	0.192621	1.74627	1.91252	36.4444	-2.53914	-96.8315	-96.8607	323.96	2.1	113.91	55.32	0.0199146	0.24038	0.30938	1
20374	29.11.2018	ETH3-161118	-0.193323	11.762	2.19538	14.1256	41.0157	2.08429	1.64852	1.81477	37.4039	-1.6084	-97.2404	-99.6283	510.88	7.05	109.33	61.91	0.0191162	0.629057	0.698057	1
20422	30.11.2018	ETH2-191118	-0.640135	-17.7363	1.42577	-21.004	74.1351	1.60804	-10.3047	-10.1384	19.6774	-18.8032	-100.902	-101.617	354.04	32.05	122.92	143.25	0.0417882	0.127651	0.196651	1
20460	1.12.2018	ETH3-161118	-0.20598	11.6612	-0.252917	11.5184	-13.49	0.094006	1.62597	1.79222	37.3374	-1.67295	-100.839	-101.398	281.08	1.53	113.48	53.02	0.0193853	0.614853	0.683853	1
20468	1.12.2018	ETH3-161118 rerun	-0.199071	11.703	-0.422804	11.3924	-14.2074	0.0835973	1.63774	1.80399	37.3609	-1.65012	-99.5232	-100.719	274.52	1.51	112.4	52.57	0.0192628	0.622606	0.691606	1
20476	3.12.2018	GH 1705-0,4	-0.151437	-3.47262	-0.227115	-0.234521	4.72684	0.0712606	-7.84686	-7.68061	31.2946	-7.53449	-102.442	-103.56	405.83	2.54	126.82	60.68	0.0216324	0.67606	0.74506	1
20525	4.12.2018	Marble Richter 131118	-0.476774	11.4935	1.51838	12.8052	29.7953	1.36225	1.9993	2.16555	37.0776	-1.9249	-155.214	-158.692	371.5	14.06	116.55	82.61	0.0205807	0.310972	0.379972	1
20533	4.12.2018	GH 1705-0,9	-0.172983	-5.2845	-0.519771	-0.466307	-18.3219	-0.550032	-9.72824	-9.56199	31.3301	-7.50003	-171.74	-171.043	376.92	6.45	132.48	76.21	0.022787	0.651882	0.720882	1
20558	4.12.2018	EG5-181204	0.187586	-27.8123	-0.223702	4.34279	12.2742	-0.607398	-35.6612	-35.495	33.7138	-7.20706	-122.4	-123.687	317.62	3.07	117.71	64.45	0.0199201	1.05651		1
20566	4.12.2018	EG5-181204 II	0.152056	-27.8274	-0.320421	4.27875	13.7292	-0.70181	-35.6581	-35.4918	33.7309	-7.19069	-119.53	-121.327	306.51	2.55	122.08	69.06	0.0214353	1.01664		1
20574	5.12.2018	ETH2-191118	-0.592819	-17.5218	0.201284	-22.004	20.069	-0.0739678	-10.2346	-10.0683	19.7802	-18.7035	-118.239	-117.498	362.16	7.62	120.83	73.54	0.0205017	0.180748	0.249748	1
20583	5.12.2018	GH 1705 1,4	-0.126178	-4.48914	-0.493807	0.359314	-17.1896	-0.831014	-9.37368	-9.20743	31.7422	-7.1003	-116.187	-116.975	361.15	1.98	127.4	59.33	0.0216473	0.704405	0.773405	1
20599	5.12.2018	ETH2-181205	-0.591383	-17.5014	-0.261871	-22.4945	2.5839	-0.916849	-10.1946	-10.0283	19.7604	-18.7227	-116.373	-116.451	323.62	6.77	108.04	60.9	0.0183042	0.18236	0.25136	1
20615	6.12.2018	EG5-181204	0.165002	-27.9402	0.110708	4.53805	36.1795	0.620572	-35.6989	-35.5327	33.6415	-7.27655	-117.823	-117.783	537	7.03	118.55	62.29	0.0203301	1.03116		1
20623	6.12.2018	GH1705-1,6	-0.154585	-5.235	-0.555523	-0.0434966	-11.2099	-0.648139	-9.93613	-9.76988	31.5674	-7.26991	-116.559	-117.418	414.47	10.28	140.06	88.75	0.0237607	0.672528	0.741528	1
20663	7.12.2018	ETH2-181205	-0.638323	-17.6982	0.250565	-22.1851	25.2973	-0.0156658	-10.2495	-10.0833	19.6605	-18.8196	-117.049	-115.495	563.03	27.3	134.66	93.83	0.0229484	0.187315	0.256315	2		2: slope: 0.9782; intercept: 0.8118
20671	7.12.2018	GH1705-2,1	-0.153353	-4.8343	-0.752638	-0.309936	-15.2411	-0.862733	-9.48733	-9.32109	31.5306	-7.30553	-117.02	-117.444	433.16	2	140.83	59.45	0.0237704	0.661735	0.730735	2
20703	10.12.2018	ETH4-101218	-0.345055	-17.6655	3.05335	-19.8061	23.2391	-0.258808	-10.324	-10.1578	19.4728	-19.0017	-119.725	-119.428	350.6	7.74	116.33	63.08	0.0196609	0.474203	0.543203	2
20735	11.12.2018	EG5 181204	0.22571	-27.7325	0.920572	5.54625	42.2374	0.79125	-35.6447	-35.4784	33.7416	-7.18044	-116.145	-118.337	466.31	8.45	107.1	63.11	0.018523	1.03255		2
20743	11.12.2018	GH 17-05 0,4	-0.124815	-3.62052	-0.312747	-0.108903	-4.89846	-0.350657	-8.13784	-7.97159	31.4043	-7.42808	-115.82	-115.947	438.02	7.18	132.08	67.2	0.0224071	0.689653	0.758653	2
20751	11.12.2018	GH 17-05 0,9	-0.121476	-5.12472	-0.369739	-0.161191	-7.04453	-0.355674	-9.69734	-9.5311	31.4101	-7.42243	-116.123	-116.304	474.81	5.08	130.44	64.27	0.0221896	0.692919	0.761919	2
20759	11.12.2018	GH 17-05 1,4	-0.163062	-4.78473	0.690712	1.23408	12.9626	0.862815	-9.47848	-9.31223	31.5822	-7.25552	-120.594	-119.924	480.48	215.12	145.15	819.77	0.0246496	0.652238	0.721238	2
20767	11.12.2018	GH 17-05 1,6	-0.134339	-5.17113	-0.34127	0.185341	-13.2154	-0.652242	-9.89855	-9.7323	31.5748	-7.26274	-120.644	-122.292	393.66	3.38	136.11	61.46	0.0233354	0.680336	0.749336	2
20775	11.12.2018	GH 17-05 1,6 II	-0.129362	-5.13143	-0.391392	0.186068	-12.472	-0.645631	-9.88929	-9.72304	31.601	-7.23728	-120.213	-122.222	400.79	3.9	133.89	60.75	0.023217	0.685205	0.754205	2
20783	12.12.2018	eth4-181210	-0.312393	-17.4824	3.54259	-19.1543	50.6307	1.08473	-10.2589	-10.0926	19.5631	-18.9141	-124.675	-125.948	454.69	41.61	111.4	111.1	0.0192275	0.49658	0.56558	3		3: slope: 1.1089; intercept: 0.8430
20791	12.12.2018	GH 17-05 2,1	-0.152338	-4.83252	-0.230169	0.329808	-0.845538	-0.137699	-9.54781	-9.38156	31.5912	-7.2468	-122.126	-122.805	425.68	8.69	133.46	68.66	0.0228107	0.674072	0.743072	3
20799	12.12.2018	GH 17-05 2,7	-0.153306	-5.15226	-0.355382	-0.44398	-3.98198	-0.28339	-9.53745	-9.3712	31.2563	-7.57159	-122.739	-122.682	423.3	12.33	124.18	87.04	0.0214543	0.672999	0.741999	3
20807	12.12.2018	GH 17-05 3,2	-0.145671	-5.18451	-0.23519	-0.0291004	1.05077	-0.122279	-9.73293	-9.56669	31.4089	-7.4236	-122.21	-121.56	447.56	9.73	136.87	71.47	0.0234141	0.681465	0.750465	3
20815	13.12.2018	ETH2-181209	-0.597239	-17.4204	0.118048	-22.01	20.7218	-0.293082	-10.1643	-9.99808	19.8194	-18.6655	-123.493	-125.024	287.79	8.55	107.51	61.58	0.018539	0.180701	0.249701	3
20823	13.12.2018	ETH3-181213	-0.216165	11.5902	-0.690666	10.9422	-7.73919	0.353179	1.63339	1.79964	37.2689	-1.73933	-122.099	-122.161	272.48	5.1	113.16	57.78	0.0190401	0.603292	0.672292	3
20863	14.12.2018	EG5-181204	0.173845	-27.7878	0.57462	5.19663	17.4335	-0.283799	-35.6487	-35.4824	33.7405	-7.18145	-118.971	-120.941	255.49	2.59	106.47	51.78	0.0184922	1.03579		3
20903	17.12.2018	ETH3-131218	-0.176119	11.4841	-0.589547	10.8529	9.78967	1.23492	1.58311	1.74935	37.1707	-1.83465	-121.99	-122.14	345.97	8.91	110.9	64.36	0.0190257	0.6477	0.7167	3
20911	17.12.2018	GH 17-05 3,2	-0.203277	-4.85829	-0.323809	0.421212	-3.50918	-0.304283	-9.61895	-9.4527	31.6869	-7.15398	-118.308	-119.254	479.28	4.29	145.17	59.94	0.024693	0.617584	0.686584	3
20919	17.12.2018	GH 17-05 2,7	-0.135204	-5.08409	-0.421994	-0.446209	-5.85668	-0.450318	-9.51936	-9.35311	31.2896	-7.53938	-117.39	-117.833	433.46	7.01	148.88	69.04	0.0252772	0.693073	0.762073	3
20927	17.12.2018	GH 17-05 3,7	-0.126205	-4.9961	-0.281574	-0.114121	-5.14198	-0.431454	-9.53811	-9.37186	31.3886	-7.44336	-117.109	-117.512	468.49	4.86	152.26	67.07	0.0258116	0.703052	0.772052	3
20935	17.12.2018	GH 17-05 1,4	-0.127266	-4.66163	-0.0681607	0.555982	-0.267962	-0.0280426	-9.43065	-9.2644	31.624	-7.21498	-117.108	-117.114	514.78	61.23	145.05	264.64	0.0248564	0.701875	0.770875	3
20959	18.12.2018	ETH4-181210	-0.335278	-17.4645	1.90058	-20.6991	32.4182	0.239892	-10.2487	-10.0824	19.5944	-18.8838	-116.363	-118.265	372.17	15.62	111.01	72.11	0.0192897	0.471202	0.540202	3
20967	18.12.2018	GH 17-05 3,7	-0.120622	-5.16382	-0.331684	-0.423645	-5.01182	-0.333739	-9.58123	-9.41498	31.2547	-7.57318	-116.682	-116.551	416.87	26.75	144.33	140.69	0.0244745	0.709243	0.778243	3
20975	18.12.2018	GM 17-02 1,5	-0.170602	-0.511161	0.64187	3.71569	0.0922841	0.570821	-6.38396	-6.21772	32.8796	-5.99704	-117.035	-116.751	413.3	259.18	154.2	995.37	0.0262974	0.653818	0.722818	3
21007	19.12.2018	ETH2-181209	-0.570223	-17.4625	0.0981147	-22.1139	17.6009	-0.35548	-10.1909	-10.0246	19.7754	-18.7082	-116.034	-117.961	291.25	10	108.06	63.61	0.0187313	0.210661	0.279661	3
21047	20.12.2018	ETH3-131218	-0.223452	11.5368	-0.681077	10.8852	3.65226	0.921214	1.62112	1.78737	37.2347	-1.77254	-118.286	-119.387	303.9	7.45	111.8	62	0.0190579	0.59521	0.66421	3
21071	20.12.2018	GH 17-05 3,2	-0.147608	-4.84987	0.146775	0.513373	-2.5822	-0.245247	-9.46928	-9.30303	31.4911	-7.34386	-117.582	-118.844	454.69	4.14	134.53	63.1	0.0229156	0.679317	0.748317	3
21087	21.12.2018	ETH4-181209	-0.342414	-17.5847	0.992338	-21.7318	10.3207	-0.725813	-10.2895	-10.1233	19.5188	-18.9571	-120.503	-121.168	304.62	4.86	108.7	56.7	0.0187303	0.463289	0.532289	3
21103	21.12.2018	EG5-181221	0.184982	-27.9164	-0.814393	4.57621	-2.58313	-1.18842	-36.1861	-36.0198	34.141	-6.79685	-120.252	-120.391	346.11	1.41	108.13	52.2	0.0182574	1.04814		3
